# Supplementary material
Source: publisher figshare collection journal article supplement (https://gsajournals.figshare.com/ndownloader/files/12708842)
Supplement: Supplementary file 1 [file 12708842]

## Sheet: Genotyping Data
0=BB; 2=AA; Missing value=-1
Marker Name\Accession Name	3	4	5	6	7	8	9	10	11	12	13	14	16	17	18	19	20	21	22	24	25	26	27	28	29	31	32	33	34	35	36	37	38	39	40	41	42	43	44	46	47	48	49	50	51	52	53	54	55
Kukri_c13513_759	2	0	0	0	0	0	0	2	2	0	0	0	0	0	2	2	0	0	2	0	2	2	0	0	0	0	0	2	2	0	2	0	2	0	0	2	2	0	2	0	2	2	0	0	0	2	2	0	0
RAC875_c50463_808	2	0	0	0	2	0	0	2	2	2	0	0	0	2	2	2	0	0	2	0	2	2	2	0	0	0	0	2	2	0	2	0	2	2	0	2	2	0	2	0	2	2	0	0	2	2	2	0	0
Jagger_rep_c10343_173	2	0	0	0	2	0	0	2	-1	2	0	0	0	-1	2	2	0	0	2	0	2	2	2	0	0	0	0	2	2	-1	2	0	2	2	0	2	2	0	2	0	2	2	-1	-1	2	2	2	0	0
Ex_c28368_426	2	0	0	0	2	0	0	2	2	2	0	0	0	-1	2	2	0	0	2	0	2	2	2	0	0	0	0	2	2	-1	2	0	2	2	0	2	2	0	2	0	2	2	-1	0	2	2	2	0	0
BS00103478_51	2	0	0	0	2	0	0	2	2	2	0	0	0	2	2	2	0	0	2	0	2	2	2	0	0	0	0	2	2	0	2	0	2	2	0	2	2	0	2	0	2	2	0	0	2	2	2	0	0
BS00081680_51	2	0	0	0	2	0	0	2	2	2	0	0	0	-1	2	2	0	0	2	0	2	2	2	0	0	0	0	2	2	0	2	0	2	2	0	2	2	0	2	0	2	2	0	0	2	2	2	0	0
wsnp_JD_c7522_8606553	2	0	0	0	2	0	0	2	2	2	0	0	0	-1	2	2	0	0	2	0	2	2	2	0	0	0	0	2	2	0	2	0	2	2	0	2	2	0	2	0	2	2	-1	-1	2	2	2	0	0
wsnp_Ex_c7965_13520238	2	0	0	0	2	0	0	2	2	2	0	0	0	-1	2	2	0	0	2	0	2	2	2	0	0	0	0	2	2	0	2	0	2	2	0	2	2	0	2	0	2	2	-1	-1	2	2	2	0	0
Tdurum_contig42479_3800	2	0	0	0	2	0	0	2	2	2	0	0	0	-1	2	2	0	0	2	0	2	2	2	0	0	0	0	2	2	0	2	0	2	2	0	2	2	0	2	0	2	2	0	-1	2	2	2	0	0
Kukri_c2121_2345	2	0	0	0	2	0	0	2	2	2	0	0	0	2	2	2	0	0	2	0	2	2	2	0	0	0	0	2	2	0	2	0	2	2	0	2	2	0	2	0	2	2	0	-1	2	2	2	0	0
Kukri_c2121_1334	2	0	0	0	2	0	0	2	2	2	0	0	0	-1	2	2	0	0	2	0	2	2	2	0	0	0	0	2	2	0	2	0	2	2	0	2	2	0	2	0	2	2	-1	-1	2	2	2	0	0
Excalibur_c25175_512	2	0	0	0	2	0	0	2	2	2	0	0	0	2	2	2	0	0	2	0	2	2	2	0	0	0	0	2	2	0	2	0	2	2	0	2	2	0	2	0	2	2	0	0	2	2	2	0	0
Ex_c4876_1221	2	0	0	0	2	0	0	2	2	2	0	0	0	-1	2	2	0	0	2	0	2	2	2	0	0	0	0	2	2	0	2	0	2	2	0	2	2	0	2	0	2	2	-1	-1	2	2	2	0	0
wsnp_Ex_c19717_28713417	2	0	0	0	2	0	0	2	2	2	0	0	0	2	2	2	0	0	2	0	2	2	2	0	0	0	0	2	2	2	2	0	2	2	0	2	2	0	2	0	2	2	0	0	2	2	2	0	0
Excalibur_c22240_938	2	0	0	0	2	0	0	2	2	2	0	0	0	2	2	2	0	0	2	0	2	2	2	0	0	0	0	2	2	2	2	0	2	2	0	2	2	0	2	0	2	2	0	0	2	2	2	0	0
RAC875_c23587_271	2	0	0	0	2	0	0	2	2	2	0	0	0	2	2	2	0	0	2	0	2	2	2	0	0	0	0	2	2	2	2	0	2	2	0	2	2	0	2	0	2	2	0	0	2	2	2	0	0
BS00081682_51	2	0	0	0	2	0	0	2	2	2	0	0	0	-1	2	2	0	-1	2	0	2	2	2	0	0	0	0	2	2	2	2	0	2	2	0	2	2	0	2	0	2	2	0	-1	2	2	2	0	0
BS00079071_51	2	0	0	0	2	0	0	2	2	2	0	0	0	-1	2	2	0	0	2	0	2	2	2	0	0	0	0	2	2	2	2	0	2	2	0	2	2	0	2	0	2	2	-1	-1	2	2	2	0	0
wsnp_Ex_c7252_12453079	2	0	0	0	2	0	0	2	2	2	0	0	0	-1	2	2	0	0	2	0	2	2	2	0	0	0	0	2	2	2	2	0	2	2	0	2	2	0	2	0	2	2	-1	-1	2	2	2	0	0
wsnp_Ex_c1137_2182795	2	0	0	0	2	0	0	2	2	2	0	0	0	-1	2	2	0	0	2	0	2	2	2	0	0	0	0	2	2	2	2	0	2	2	0	2	2	0	2	0	2	2	0	0	2	2	2	0	0
BS00022288_51	0	0	0	2	2	0	0	2	0	2	0	0	0	2	2	2	0	0	2	0	2	2	2	0	0	0	0	2	2	2	2	0	2	2	2	2	2	0	2	0	2	2	0	0	2	2	2	0	0
RAC875_c97040_104	0	0	0	2	2	0	0	2	-1	2	0	0	0	-1	2	2	0	0	2	0	2	2	2	0	0	0	0	2	2	2	2	0	2	2	2	2	2	0	2	0	2	2	-1	-1	2	2	2	0	0
Kukri_c7393_851	0	0	0	2	2	0	0	2	2	2	-1	0	0	2	2	2	2	0	2	0	2	2	2	0	0	0	0	2	2	-1	2	0	2	2	2	2	2	0	2	0	2	2	-1	-1	2	2	2	0	0
RAC875_c5831_1486	0	0	0	2	2	0	0	2	2	2	0	0	0	2	2	2	2	0	2	0	2	2	2	0	0	0	0	2	2	2	2	0	2	2	2	2	2	0	2	0	2	2	2	2	2	2	2	0	0
Excalibur_c97691_225	0	0	0	2	2	0	0	2	-1	2	0	0	0	-1	2	2	2	0	2	0	2	2	2	0	0	0	0	2	2	2	2	0	2	2	2	2	2	0	2	0	2	2	-1	-1	2	2	2	0	0
IAAV8085	0	0	0	2	2	0	0	2	-1	2	0	0	0	0	2	2	2	0	2	0	2	2	2	0	0	0	0	2	2	-1	2	0	2	2	2	2	2	0	2	0	2	2	0	2	2	2	2	0	0
Excalibur_c5139_198	0	0	0	2	2	0	0	2	0	2	0	0	0	-1	2	2	2	0	2	0	2	2	2	0	0	0	0	2	2	0	2	0	2	2	2	2	2	0	2	0	2	2	0	0	2	2	2	0	0
wsnp_Ex_c1358_2601510	0	0	0	2	2	0	0	2	-1	2	0	0	0	-1	2	2	2	0	2	0	2	2	2	0	0	0	0	2	2	-1	2	0	2	2	2	2	2	0	2	0	2	2	-1	-1	2	2	2	0	0
RAC875_c75971_349	0	0	0	2	2	0	0	2	0	2	0	0	0	2	2	2	2	0	2	0	2	2	2	0	0	0	0	2	2	-1	2	0	2	2	2	2	2	0	2	0	2	2	0	0	2	2	2	0	0
Excalibur_c1358_794	0	0	0	2	2	0	0	2	0	2	0	0	0	-1	2	2	2	0	2	0	2	2	2	0	0	0	0	2	2	-1	2	0	2	2	2	2	2	0	2	0	2	2	0	0	2	2	2	0	0
BS00010039_51	0	0	0	2	2	0	0	2	0	2	0	0	0	-1	2	2	2	0	2	0	2	2	2	0	0	0	0	2	2	0	2	0	2	2	2	2	2	0	2	0	2	2	-1	-1	2	2	2	0	0
wsnp_Ex_c57982_59470152	0	0	0	2	2	0	0	2	0	2	0	0	0	-1	2	2	2	0	2	0	2	2	2	0	0	0	0	2	2	0	2	0	2	2	2	2	2	0	2	0	2	2	-1	-1	2	2	2	0	0
Tdurum_contig46413_779	0	0	0	2	2	0	0	2	-1	2	0	0	0	-1	2	2	2	0	2	0	2	2	2	0	0	0	0	2	2	-1	2	0	2	2	2	2	2	0	2	0	2	2	0	0	2	2	2	0	0
RAC875_c18640_821	0	0	0	2	2	0	0	2	0	2	0	0	0	-1	2	2	2	0	2	0	2	2	2	0	0	0	0	2	2	0	2	0	2	2	2	2	2	0	2	0	2	2	-1	-1	2	2	2	0	0
Excalibur_c82557_201	0	0	0	2	2	0	0	2	0	2	0	0	0	-1	2	2	2	0	2	0	2	2	2	0	0	0	0	2	2	0	2	0	2	2	2	2	2	0	2	0	2	2	0	-1	2	2	2	0	0
Excalibur_c71158_54	0	0	0	2	2	0	0	2	0	2	0	0	0	-1	2	2	2	0	2	0	2	2	2	0	0	0	0	2	2	0	2	0	2	2	2	2	2	0	2	0	2	2	-1	-1	2	2	2	0	0
CAP8_c2448_355	0	0	0	2	2	0	0	2	0	2	0	0	0	2	2	2	2	0	2	0	2	2	2	0	0	0	0	2	2	0	2	0	2	2	2	2	2	0	2	0	2	2	0	0	2	2	2	0	0
BS00076278_51	0	0	0	2	2	0	0	2	0	2	0	0	0	-1	2	2	2	0	2	0	2	2	2	0	0	0	0	2	2	0	2	0	2	2	2	2	2	0	2	0	2	2	-1	-1	2	2	2	0	0
BS00069278_51	0	0	0	2	2	0	-1	2	-1	2	0	0	0	2	2	2	2	-1	2	0	2	2	2	-1	0	0	0	2	2	0	2	0	2	2	2	2	2	0	2	0	2	2	-1	-1	2	2	2	0	0
wsnp_Ku_c183_358844	0	0	0	2	2	0	0	2	0	2	0	0	0	-1	2	2	2	0	2	0	2	2	2	0	0	0	0	2	2	0	2	0	2	2	2	2	2	0	2	0	2	2	-1	-1	2	2	2	0	0
tplb0053o08_2004	0	0	0	2	2	0	0	2	0	2	0	0	0	-1	2	2	2	0	2	0	2	2	2	0	0	0	0	2	2	0	2	0	2	2	2	2	2	0	2	0	2	2	-1	-1	2	2	2	0	0
Kukri_c32052_171	0	0	0	2	2	0	0	2	0	2	0	0	0	2	2	2	2	0	2	0	2	2	2	0	0	0	0	2	2	0	2	0	2	2	2	2	2	0	2	0	2	2	0	0	2	2	2	0	0
Kukri_c29655_239	0	0	0	2	2	0	0	2	0	2	0	0	0	-1	2	2	2	-1	2	0	2	2	2	0	0	0	0	2	2	0	2	0	2	2	2	2	2	0	2	0	2	2	0	0	2	2	2	0	0
Kukri_c24962_123	0	0	0	2	2	0	0	2	0	2	0	0	0	2	2	2	2	0	2	0	2	2	2	0	0	0	0	2	2	0	2	0	2	2	2	2	2	0	2	0	2	2	0	0	2	2	2	0	0
IAAV8297	0	0	0	2	2	0	0	2	0	2	0	0	0	-1	2	2	2	0	2	0	2	2	2	0	0	0	0	2	2	0	2	0	2	2	2	2	2	0	2	0	2	2	-1	0	2	2	2	0	0
GENE-4120_155	0	0	0	2	2	0	0	2	0	2	0	0	0	2	2	2	2	0	2	0	2	2	2	0	0	0	0	2	2	0	2	0	2	2	2	2	2	0	2	0	2	2	-1	-1	2	2	2	0	0
BS00010128_51	0	0	0	2	2	0	0	2	0	2	0	0	0	2	2	2	2	0	2	0	2	2	2	0	0	0	0	2	2	0	2	0	2	2	2	2	2	0	2	0	2	2	0	0	2	2	2	0	0
BS00108351_51	0	0	0	2	2	0	0	2	0	2	0	0	0	2	2	2	2	0	2	0	2	2	2	0	0	0	0	2	2	0	2	0	2	2	2	2	2	0	2	0	2	2	0	0	2	2	2	0	0
Kukri_rep_c102231_265	2	0	0	2	2	2	0	0	0	2	0	0	0	2	0	2	2	0	2	0	2	2	2	0	0	0	0	2	2	2	2	0	2	2	2	2	2	0	2	0	2	2	0	0	2	2	2	2	2
Tdurum_contig43475_155	2	0	0	2	2	2	0	0	0	2	0	0	0	2	-1	2	2	0	2	0	2	2	2	0	0	0	0	2	2	2	2	0	2	2	2	2	2	0	2	0	2	2	-1	-1	2	2	2	2	2
wsnp_Ex_c10657_17376448	2	0	0	2	2	2	0	0	-1	2	0	0	0	-1	0	2	2	0	2	0	2	2	2	0	0	0	0	2	2	2	2	0	2	2	2	2	2	0	2	0	2	2	0	0	2	2	2	2	2
BS00026456_51	2	0	0	2	2	2	0	0	-1	2	0	0	0	-1	-1	2	2	0	2	0	2	2	2	0	0	0	0	2	2	2	2	0	2	2	2	2	2	0	2	0	2	2	-1	-1	2	2	2	2	2
tplb0062i18_102	2	0	0	2	2	2	0	0	0	2	0	0	0	-1	0	2	2	0	2	0	2	2	2	0	0	0	0	2	2	2	2	0	2	2	2	2	2	0	2	0	2	2	0	0	2	2	2	2	2
BS00014831_51	2	0	0	2	2	2	0	0	0	2	0	0	0	-1	0	2	2	0	2	0	2	2	2	0	0	0	0	2	2	2	2	0	2	2	2	2	2	0	2	0	2	2	0	0	2	2	2	2	2
BS00082567_51	2	0	0	2	2	2	0	0	0	2	0	0	0	-1	-1	2	2	0	2	0	2	2	2	0	0	0	0	2	2	2	2	0	2	2	2	2	2	0	2	0	2	2	-1	-1	2	2	2	2	2
Kukri_c22349_754	2	0	0	2	2	2	0	0	0	2	0	0	0	0	0	2	2	0	2	0	2	2	2	0	0	0	0	2	2	2	2	0	2	2	2	2	2	0	2	0	2	2	0	0	2	2	2	2	2
CAP12_c3074_192	2	0	0	2	2	2	0	0	0	2	0	0	0	-1	0	2	2	0	2	0	2	2	2	0	0	0	0	2	2	2	2	0	2	2	2	2	2	0	2	0	2	2	0	0	2	2	2	2	2
RAC875_c9457_507	2	0	0	2	2	2	0	0	-1	2	0	0	0	-1	-1	2	2	0	2	0	2	2	2	0	0	0	0	2	2	2	2	0	2	2	2	2	2	0	2	0	2	2	-1	-1	2	2	2	2	2
BS00108242_51	2	0	0	2	2	2	0	0	-1	2	0	0	0	-1	-1	2	2	0	2	0	2	2	2	0	0	0	0	2	2	2	2	0	2	2	2	2	2	0	2	0	2	2	-1	-1	2	2	2	2	2
Kukri_c7192_1077	2	0	0	2	2	2	0	0	0	2	0	0	0	2	0	2	2	0	2	0	2	2	2	0	0	0	0	2	2	2	2	0	2	2	2	2	2	0	2	0	2	2	0	0	2	2	2	2	2
Tdurum_contig42405_197	2	0	0	2	2	2	0	0	-1	2	0	0	0	-1	0	2	2	0	2	0	2	2	2	0	0	0	0	2	2	0	2	0	2	2	2	2	2	0	2	0	2	2	0	-1	2	2	2	2	2
Excalibur_c35316_154	2	0	0	2	2	2	0	0	0	2	0	0	0	-1	0	2	2	0	2	0	2	2	2	0	0	0	0	2	2	0	2	0	2	2	2	2	2	0	2	0	2	2	0	0	2	2	2	2	2
BS00000713_51	2	0	0	2	2	2	0	0	0	2	0	0	0	2	0	2	2	0	2	0	2	2	2	0	0	0	0	2	2	0	2	0	2	2	2	2	2	0	2	0	2	2	0	2	2	2	2	2	2
RAC875_rep_c110533_92	2	0	0	2	2	2	0	0	-1	2	0	0	0	-1	0	2	2	0	2	0	2	2	2	0	0	0	0	2	2	0	2	0	2	2	2	2	2	0	2	0	2	2	-1	-1	2	2	2	2	2
Kukri_c1818_2671	2	0	0	2	2	2	0	0	0	2	0	0	0	2	-1	2	2	0	2	0	2	2	2	0	0	0	0	2	2	0	2	0	2	2	2	2	2	0	2	0	2	2	-1	-1	2	2	2	2	2
GENE-0014_317	2	0	0	2	2	2	0	0	0	2	0	0	0	2	2	2	2	0	2	0	2	2	2	0	0	0	0	2	2	0	2	0	2	2	2	2	2	0	2	0	2	2	-1	2	2	2	2	2	2
wsnp_Ra_c11211_18227610	2	0	0	2	2	2	0	0	0	2	0	0	0	-1	0	2	2	0	2	0	2	2	2	0	0	0	0	2	2	0	2	0	2	2	2	2	2	0	2	0	2	2	0	-1	2	2	2	2	2
wsnp_Ex_c10657_17376086	2	0	0	2	2	2	0	0	0	2	0	0	0	2	0	2	2	0	2	0	2	2	2	0	0	0	0	2	2	0	2	0	2	2	2	2	2	0	2	0	2	2	0	0	2	2	2	2	2
tplb0025b13_372	2	0	0	2	2	2	0	0	0	2	0	0	0	2	0	2	2	0	2	0	2	2	2	0	0	0	0	2	2	0	2	0	2	2	2	2	2	0	2	0	2	2	0	0	2	2	2	2	2
tplb0025b13_2879	2	0	0	2	2	2	0	0	0	2	0	0	0	-1	0	2	2	0	2	0	2	2	2	0	0	0	0	2	2	0	2	0	2	2	2	2	2	0	2	0	2	2	-1	-1	2	2	2	2	2
tplb0025b13_2372	2	0	0	2	2	2	0	0	0	2	0	0	0	-1	-1	2	2	0	2	0	2	2	2	0	0	0	0	2	2	0	2	0	2	2	2	2	2	0	2	0	2	2	0	-1	2	2	2	2	2
tplb0025b13_2054	2	0	0	2	2	2	0	0	0	2	0	0	0	-1	0	2	2	0	2	0	2	2	2	0	0	0	0	2	2	0	2	0	2	2	2	2	2	0	2	0	2	2	-1	-1	2	2	2	2	2
tplb0025b13_1721	2	0	0	2	2	2	0	0	0	2	0	0	0	-1	0	2	2	0	2	0	2	2	2	0	0	0	0	2	2	0	2	0	2	2	2	2	2	0	2	0	2	2	-1	0	2	2	2	2	2
Kukri_rep_c68121_997	2	0	0	2	2	2	0	0	0	2	0	0	0	2	0	2	2	0	2	0	2	2	2	0	0	0	0	2	2	0	2	0	2	2	2	2	2	0	2	0	2	2	0	0	2	2	2	2	2
Kukri_rep_c108573_60	2	0	0	2	2	2	0	0	0	2	0	0	0	2	-1	2	2	0	2	0	2	2	2	0	0	0	0	2	2	0	2	0	2	2	2	2	2	0	2	0	2	2	0	0	2	2	2	2	2
Kukri_c7192_1128	2	0	0	2	2	2	0	0	0	2	0	0	0	-1	-1	2	2	0	2	0	2	2	2	0	0	0	0	2	2	0	2	0	2	2	2	2	2	0	2	0	2	2	-1	-1	2	2	2	2	2
Kukri_c2408_857	2	0	0	2	2	2	0	0	0	2	0	0	0	-1	-1	2	2	0	2	0	2	2	2	0	0	0	0	2	2	0	2	0	2	2	2	2	2	0	2	0	2	2	-1	-1	2	2	2	2	2
Kukri_c1818_2380	2	0	0	2	2	2	0	0	0	2	0	0	0	-1	-1	2	2	0	2	0	2	2	2	0	0	0	0	2	2	0	2	0	2	2	2	2	2	0	2	0	2	2	-1	-1	2	2	2	2	2
IACX2941	2	0	0	2	2	2	0	0	0	2	0	0	0	-1	0	2	2	0	2	0	2	2	2	0	0	0	0	2	2	0	2	0	2	2	2	2	2	0	2	0	2	2	-1	-1	2	2	2	2	2
IAAV5306	2	0	0	2	2	2	0	0	0	2	0	0	0	-1	0	2	2	0	2	0	2	2	2	0	0	0	0	2	2	0	2	0	2	2	2	2	2	0	2	0	2	2	0	0	2	2	2	2	2
GENE-3954_370	2	0	0	2	2	2	0	0	0	2	0	0	0	2	0	2	2	0	2	0	2	2	2	0	0	0	0	2	2	0	2	0	2	2	2	2	2	0	2	0	2	2	0	0	2	2	2	2	2
Excalibur_rep_c70751_58	2	0	0	2	2	2	0	0	0	2	0	0	0	-1	0	2	2	0	2	0	2	2	2	0	0	0	0	2	2	0	2	0	2	2	2	2	2	0	2	0	2	2	0	0	2	2	2	2	2
Excalibur_c94139_55	2	0	0	2	2	2	0	0	0	2	0	0	0	-1	0	2	2	0	2	0	2	2	2	0	0	0	0	2	2	0	2	0	2	2	2	2	2	0	2	0	2	2	-1	-1	2	2	2	2	2
Excalibur_c44612_474	2	0	0	2	2	2	0	0	0	2	0	0	0	-1	-1	2	2	0	2	0	2	2	2	0	0	0	0	2	2	0	2	0	2	2	2	2	2	0	2	0	2	2	0	-1	2	2	2	2	2
Excalibur_c21898_153	2	0	0	2	2	2	0	0	0	2	0	0	0	2	0	2	2	0	2	0	2	2	2	0	0	0	0	2	2	0	2	0	2	2	2	2	2	0	2	0	2	2	0	0	2	2	2	2	2
Excalibur_c15165_367	2	0	0	2	2	2	0	0	0	2	0	0	0	-1	0	2	2	0	2	0	2	2	2	0	0	0	0	2	2	0	2	0	2	2	2	2	2	0	2	0	2	2	0	-1	2	2	2	2	2
CAP12_c8501_370	2	0	0	2	2	2	0	0	0	2	0	0	0	-1	-1	2	2	0	2	0	2	2	2	0	0	0	0	2	2	0	2	0	2	2	2	2	2	0	2	0	2	2	-1	-1	2	2	2	2	2
BS00093327_51	2	0	0	2	2	2	0	0	0	2	0	0	0	2	-1	2	2	0	2	0	2	2	2	0	0	0	0	2	2	0	2	0	2	2	2	2	2	0	2	0	2	2	0	-1	2	2	2	2	2
BS00068351_51	2	0	0	2	2	2	0	0	0	2	0	0	0	2	-1	2	2	0	2	0	2	2	2	0	0	0	0	2	2	0	2	0	2	2	2	2	2	0	2	0	2	2	-1	-1	2	2	2	2	2
BobWhite_c21669_430	2	0	0	2	2	2	0	0	0	2	0	0	0	2	0	2	2	0	2	0	2	2	2	0	0	0	0	2	2	0	2	0	2	2	2	2	2	0	2	0	2	2	0	0	2	2	2	2	2
tplb0028p02_562	2	0	0	2	2	2	0	0	0	2	0	0	0	-1	0	2	2	0	2	0	2	2	2	0	0	0	0	2	2	0	2	0	2	2	2	2	2	0	2	0	2	2	0	-1	2	2	2	2	2
BS00090003_51	2	0	0	2	2	2	0	0	0	2	0	0	0	-1	-1	2	2	0	2	0	2	2	2	0	0	0	0	2	2	0	2	0	2	2	2	2	2	0	2	0	2	2	-1	-1	2	2	2	2	2
BS00082566_51	2	0	0	2	2	2	0	0	0	2	0	0	0	-1	-1	2	2	0	2	0	2	2	2	0	0	0	0	2	2	0	2	0	2	2	2	2	2	0	2	0	2	2	-1	-1	2	2	2	2	2
RFL_Contig2831_1012	2	0	0	2	2	2	0	0	0	2	0	0	0	-1	0	2	2	0	2	0	2	2	2	0	0	0	0	2	2	0	2	0	2	2	2	2	2	0	2	0	2	2	0	0	2	2	2	2	2
Tdurum_contig44888_837	2	0	0	2	2	2	0	0	-1	2	0	0	0	-1	-1	2	2	0	2	0	2	2	2	0	0	0	0	2	2	0	2	0	2	2	2	2	2	0	2	0	2	2	-1	-1	2	2	2	2	2
IAAV3919	2	0	0	2	2	2	0	0	-1	2	0	0	0	-1	-1	2	2	0	2	0	2	2	2	0	0	0	0	2	2	0	2	0	2	2	2	2	2	0	2	0	2	2	-1	-1	2	2	2	2	2
BS00100774_51	2	0	0	2	2	2	0	0	0	2	0	0	0	-1	0	2	2	0	2	0	2	2	2	0	0	0	0	2	2	0	2	0	2	2	2	2	2	0	2	0	2	2	0	0	2	2	2	2	2
BS00033750_51	2	0	0	2	2	2	0	0	0	2	0	0	0	-1	-1	2	2	0	2	0	2	2	2	0	0	0	0	2	2	0	2	0	2	2	2	2	2	0	2	0	2	2	0	-1	2	2	2	2	2
BS00033749_51	2	0	0	2	2	2	0	0	-1	2	0	0	0	-1	-1	2	2	0	2	0	2	2	2	0	0	0	0	2	2	0	2	0	2	2	2	2	2	0	2	0	2	2	-1	-1	2	2	2	2	-1
BS00023130_51	2	0	0	2	2	2	0	0	0	2	0	0	0	-1	-1	2	2	0	2	0	2	2	2	0	0	0	0	2	2	0	2	0	2	2	2	2	2	0	2	0	2	2	-1	-1	2	2	2	2	2
BS00022677_51	2	0	0	2	2	2	0	0	0	2	0	0	0	-1	-1	2	2	0	2	0	2	2	2	0	0	0	0	2	2	0	2	0	2	2	2	2	2	0	2	0	2	2	-1	0	2	2	2	2	2
RAC875_c42700_264	2	0	0	2	2	2	0	0	-1	2	0	0	0	-1	-1	2	2	0	2	0	2	2	2	0	0	0	0	2	2	0	2	0	2	2	2	2	2	0	2	0	2	2	-1	-1	2	2	2	2	2
Ku_c28007_1398	2	0	0	2	2	2	0	0	0	2	0	0	0	2	-1	2	2	0	2	0	2	2	2	0	0	0	0	2	2	0	2	0	2	2	2	2	2	0	2	0	2	2	0	-1	2	2	2	2	2
GENE-1118_58	2	0	0	2	2	2	0	0	0	2	0	0	0	-1	-1	2	2	0	2	0	2	2	2	0	0	0	0	2	2	-1	2	0	2	2	2	2	2	0	2	0	2	2	-1	-1	2	2	2	2	2
BobWhite_c1361_1187	2	0	0	2	2	2	0	0	0	2	0	0	0	-1	-1	2	2	0	2	0	2	2	2	0	0	0	0	2	2	0	2	0	2	2	2	2	2	0	2	0	2	2	-1	-1	2	2	2	2	2
RAC875_c22821_542	2	0	0	0	2	0	0	2	0	2	0	0	0	-1	2	2	0	0	2	0	2	2	2	0	0	0	0	2	2	-1	2	0	2	2	2	2	2	0	2	0	2	2	-1	-1	2	2	2	0	0
Kukri_c5715_141	2	0	0	0	2	0	0	2	0	2	0	0	0	-1	2	2	0	0	2	0	2	2	2	0	0	0	0	2	2	0	2	0	2	2	2	2	2	0	2	0	2	2	0	0	2	2	2	0	0
BS00110709_51	2	0	0	0	2	0	0	2	0	2	0	0	0	2	2	2	0	0	2	0	2	2	2	0	0	0	0	2	2	0	2	0	2	2	2	2	2	0	2	0	2	2	0	0	2	2	2	0	0
BS00022270_51	2	0	0	0	2	0	0	2	0	2	0	0	0	-1	2	2	0	0	2	0	2	2	2	0	0	0	0	2	2	0	2	0	2	2	2	2	2	0	2	0	2	2	0	0	2	2	2	0	0
RFL_Contig1703_695	2	0	0	0	2	0	0	2	-1	2	0	0	0	2	2	2	0	0	2	0	2	2	2	0	0	0	0	2	2	0	2	0	2	2	0	2	2	0	2	0	2	2	0	0	2	2	2	0	0
Excalibur_rep_c92985_618	2	0	0	0	2	0	0	2	0	2	2	0	0	0	2	2	0	0	2	2	2	2	2	0	2	0	0	0	2	0	0	0	2	2	0	2	2	0	2	2	0	2	0	0	2	0	0	2	0
RAC875_c13012_1598	2	0	0	0	2	0	0	2	0	2	2	0	0	0	2	2	0	0	2	2	2	2	2	0	2	0	0	0	2	0	0	0	2	2	0	2	2	0	2	2	0	2	0	0	2	0	0	2	0
wsnp_Ex_c10783_17554146	2	0	0	0	2	0	0	0	0	2	2	0	0	0	2	2	0	0	2	2	2	2	2	0	0	0	2	0	2	2	0	0	2	2	0	2	2	0	2	2	0	2	0	0	2	0	0	2	0
BS00078982_51	2	0	0	0	2	0	0	0	-1	2	2	0	0	-1	2	2	0	0	2	2	2	2	2	0	0	0	2	0	2	2	0	0	2	2	0	2	2	0	2	2	0	2	-1	0	2	0	0	2	0
wsnp_Ku_c42878_50516167	2	0	0	0	2	0	0	0	-1	2	2	0	0	-1	2	2	0	0	2	2	2	2	2	0	0	0	2	0	2	2	0	0	2	2	0	2	2	0	2	2	0	2	-1	-1	2	0	0	2	0
wsnp_Ex_c5323_9408829	2	0	0	0	2	0	0	0	-1	2	2	0	0	-1	2	2	0	0	2	2	2	2	2	0	0	0	2	0	2	2	0	0	2	2	0	2	2	0	2	2	0	2	-1	-1	2	0	0	2	0
wsnp_Ex_c48087_53105842	2	0	0	0	2	0	0	0	-1	2	2	-1	0	-1	2	2	0	-1	2	2	2	2	2	0	0	0	2	0	2	2	0	0	2	2	0	2	2	0	2	2	0	2	-1	-1	2	0	0	2	0
wsnp_Ex_c10783_17555091	2	0	0	0	2	0	0	0	-1	2	2	0	0	-1	2	2	0	0	2	2	2	2	2	0	0	0	2	0	2	2	0	0	2	2	0	2	2	0	2	2	0	2	-1	0	2	0	0	2	0
RAC875_c8245_272	2	0	0	0	2	0	0	0	-1	2	2	0	0	-1	2	2	0	0	2	2	2	2	2	0	0	0	2	0	2	2	0	0	2	2	0	2	2	0	2	2	0	2	0	-1	2	0	0	2	0
Kukri_c7436_2259	2	0	0	0	2	0	0	0	-1	2	2	0	0	-1	2	2	0	0	2	2	2	2	2	0	0	0	2	0	2	2	0	0	2	2	0	2	2	0	2	2	0	2	-1	-1	2	0	0	2	0
Kukri_c16098_95	2	0	0	0	2	0	0	0	-1	2	2	0	0	-1	2	2	0	0	2	2	2	2	2	0	0	0	2	0	2	2	0	0	2	2	0	2	2	0	2	2	0	2	0	-1	2	0	0	2	0
CAP7_c4833_141	2	0	0	0	2	0	0	0	-1	2	2	0	0	-1	2	2	0	0	2	2	2	2	2	0	0	0	2	0	2	2	0	0	2	2	0	2	2	0	2	2	0	2	-1	-1	2	0	0	2	0
BS00105601_51	2	0	0	0	2	0	0	0	-1	2	2	0	0	-1	2	2	0	0	2	2	2	2	2	0	0	0	2	0	2	2	0	0	2	2	0	2	2	0	2	2	0	2	-1	-1	2	0	0	2	0
wsnp_Ku_rep_c101175_88380491	2	0	0	0	2	0	0	0	0	2	2	0	0	-1	2	2	0	0	2	2	2	2	2	0	0	0	2	0	2	2	0	0	2	2	0	2	2	0	2	2	0	2	0	0	2	0	0	2	0
wsnp_Ex_c5323_9409407	2	0	0	0	2	0	0	0	-1	2	2	0	0	-1	2	2	0	0	2	2	2	2	2	0	0	0	2	0	2	2	0	0	2	2	0	2	2	0	2	2	0	2	0	0	2	0	0	2	0
RAC875_c1825_188	2	0	0	0	2	0	0	0	0	2	2	0	0	2	2	2	0	0	2	2	2	2	2	0	0	0	2	0	2	2	0	0	2	2	0	2	2	0	2	2	0	2	0	0	2	0	0	2	0
wsnp_Ku_c11896_19337444	2	0	2	0	2	0	0	0	0	2	2	0	0	-1	2	2	2	0	2	2	2	2	2	0	0	0	2	0	2	2	0	0	2	2	0	2	2	0	2	2	0	2	0	0	2	0	0	2	0
Kukri_c13136_1363	2	0	2	0	2	0	0	0	0	2	2	0	0	-1	2	2	2	0	2	2	2	2	2	0	0	0	2	0	2	2	0	0	2	2	0	2	2	0	2	2	0	2	0	-1	2	0	0	2	0
GENE-0509_639	2	0	2	0	2	0	0	0	0	2	2	0	0	-1	2	2	2	0	2	2	2	2	2	0	0	0	2	0	2	2	0	0	2	2	0	2	2	0	2	2	0	2	-1	-1	2	0	0	2	0
Excalibur_c7026_2635	2	0	2	0	2	0	0	0	0	2	2	0	0	-1	2	2	2	0	2	2	2	2	2	0	0	0	2	0	2	2	0	0	2	2	0	2	2	0	2	2	0	2	0	0	2	0	0	2	0
BobWhite_c48591_394	2	0	2	0	2	0	0	0	0	2	2	0	0	0	2	2	2	0	2	2	2	2	2	0	0	0	2	0	2	2	0	0	2	2	0	2	2	0	2	2	0	2	0	0	2	0	0	2	0
wsnp_Ra_c26191_35761997	2	0	2	0	2	0	0	0	0	2	2	0	0	-1	2	2	2	0	2	2	2	2	2	0	0	0	2	0	2	2	0	0	2	2	0	2	2	0	2	2	0	2	0	-1	2	0	0	2	0
Tdurum_contig13937_2280	2	0	2	0	2	0	0	0	0	2	2	0	0	-1	2	2	2	0	2	2	2	2	2	0	0	0	2	0	2	2	0	0	2	2	0	2	2	0	2	2	0	2	-1	-1	2	0	0	2	0
IAAV5252	2	0	2	0	2	0	0	0	0	2	2	0	0	-1	2	2	2	0	2	2	2	2	2	0	0	0	2	0	2	2	0	0	2	2	0	2	2	0	2	2	0	2	-1	-1	2	0	0	2	0
RFL_Contig2160_524	2	0	2	-1	2	0	0	0	0	2	2	0	0	-1	2	2	2	0	2	2	2	2	2	0	0	0	2	0	2	2	0	0	2	2	0	2	2	0	2	2	0	2	0	-1	2	0	0	2	0
Tdurum_contig8382_300	2	0	2	0	2	0	0	0	0	2	2	0	0	-1	2	2	2	0	2	2	2	2	2	0	0	0	2	0	2	2	0	0	2	2	0	2	2	0	2	2	0	2	-1	-1	2	0	0	2	0
Kukri_c31964_56	2	0	2	0	2	0	0	0	0	2	2	0	0	-1	2	2	2	0	2	2	2	2	2	0	0	0	2	0	2	2	0	0	2	2	0	2	2	0	2	2	0	2	0	0	2	0	0	2	0
Kukri_c31964_109	2	0	2	0	2	0	0	0	0	2	2	0	0	-1	2	2	2	0	2	2	2	2	2	0	0	0	2	0	2	2	0	0	2	2	0	2	2	0	2	2	0	2	0	0	2	0	0	2	0
BS00084022_51	0	0	2	0	2	0	0	0	0	2	2	0	0	0	2	2	2	0	2	2	2	2	2	0	0	0	2	0	2	0	0	0	2	2	0	2	2	0	2	2	0	2	0	0	2	0	0	2	0
wsnp_Ex_c1309_2503093	0	0	2	0	2	0	0	0	0	2	2	0	0	-1	2	2	2	0	2	2	2	2	2	0	0	0	2	0	2	-1	0	0	2	2	0	2	2	0	2	2	0	2	0	0	2	0	0	2	0
BobWhite_c149_1839	0	0	2	0	2	0	0	0	0	2	2	0	0	-1	2	2	2	0	2	2	2	2	2	0	0	0	2	0	2	-1	0	0	2	2	0	2	2	0	2	2	0	2	0	0	2	0	0	2	0
Excalibur_c1014_371	0	0	2	0	2	0	0	0	0	2	2	0	0	-1	2	2	2	0	2	2	2	2	2	0	0	0	2	0	2	-1	0	0	2	2	0	2	2	0	2	2	0	2	0	-1	2	0	0	2	0
wsnp_BE586140A_Ta_2_1	0	-1	2	0	2	0	0	0	0	2	2	0	0	-1	2	2	2	0	2	2	2	2	2	0	0	0	2	0	2	0	0	0	2	2	0	2	2	0	2	2	0	2	-1	-1	2	0	0	2	0
BobWhite_c4499_153	0	0	2	0	2	0	0	0	0	2	2	0	0	0	2	2	2	0	2	2	2	2	2	0	0	0	2	0	2	0	0	0	2	2	0	2	2	0	2	2	0	2	0	0	2	0	0	2	0
RAC875_c9700_989	0	0	2	0	2	0	0	0	0	2	2	0	0	0	2	2	2	0	2	2	2	2	2	0	0	0	2	0	2	2	0	0	2	2	0	2	2	0	2	2	0	2	0	0	2	0	0	2	0
Excalibur_rep_c100567_692	0	0	2	0	2	0	0	0	0	2	2	0	0	-1	2	2	2	0	2	2	2	2	2	0	0	0	2	0	2	2	0	0	2	2	0	2	2	0	2	2	0	2	0	0	2	0	0	2	0
wsnp_Ex_c11047_17915225	0	0	2	0	2	0	0	0	0	2	2	0	0	-1	2	2	2	0	2	2	2	2	2	0	0	0	2	0	2	2	0	0	2	2	0	2	2	0	2	2	0	2	0	0	2	0	0	2	0
wsnp_Ex_c11047_17915103	0	0	2	-1	2	0	0	0	0	2	2	0	0	0	2	2	2	0	2	2	2	2	2	0	0	0	2	0	2	2	0	0	2	2	0	2	2	0	2	2	0	2	0	0	2	0	0	2	0
Kukri_c46010_872	0	0	2	0	2	0	0	0	0	2	2	0	0	-1	2	2	2	0	0	2	2	2	2	0	0	0	2	0	2	2	0	0	2	2	0	2	2	0	2	2	0	2	-1	2	2	0	0	2	0
RAC875_c14066_452	0	0	2	0	2	0	0	0	-1	2	2	0	0	-1	2	2	2	0	0	2	2	2	2	0	0	0	2	0	2	2	0	0	2	2	0	2	2	0	2	2	0	2	0	2	0	0	0	2	0
RAC875_rep_c111911_116	0	0	2	0	2	0	0	0	0	2	2	0	0	0	2	2	2	0	0	2	2	2	2	0	0	0	2	0	2	2	0	0	2	2	0	2	2	0	2	2	0	2	0	2	0	0	0	2	0
RAC875_c10090_963	0	-1	2	0	2	0	0	0	-1	2	2	0	0	-1	2	2	2	0	0	2	2	2	2	0	0	0	2	0	2	2	0	0	2	2	0	2	2	0	2	2	0	2	-1	-1	0	0	0	2	0
Excalibur_c7237_1208	0	0	2	0	2	0	0	0	0	2	2	0	0	0	2	2	2	0	0	2	2	2	2	0	0	0	2	0	2	2	0	0	2	2	0	2	2	0	2	2	0	2	0	2	0	0	0	2	0
Excalibur_c7237_1084	0	0	2	0	2	0	0	0	-1	2	2	0	0	-1	2	2	2	0	0	2	2	2	2	0	0	0	2	0	2	2	0	0	2	2	0	2	2	0	2	2	0	2	0	2	0	0	0	2	0
Tdurum_contig13946_329	0	-1	2	0	2	0	0	0	0	2	2	0	0	-1	2	2	2	0	0	2	2	2	2	0	0	0	2	0	2	0	0	0	2	2	0	2	2	0	2	2	0	2	-1	-1	0	0	0	2	0
Tdurum_contig13946_241	0	-1	2	0	2	0	0	0	0	2	2	0	0	-1	2	2	2	0	0	2	2	2	2	0	0	0	2	0	2	0	0	0	2	2	0	2	2	0	2	2	0	2	-1	-1	0	0	0	2	0
IACX1465	0	0	2	0	2	0	0	0	0	2	2	0	0	0	2	2	2	0	0	2	2	2	2	0	0	0	2	0	2	0	0	0	2	2	0	2	2	0	2	2	0	2	0	-1	0	0	0	2	0
IACX1592	0	-1	2	0	2	0	0	0	-1	2	2	0	0	-1	2	2	2	0	0	2	2	2	2	0	0	0	2	0	2	0	0	0	2	2	0	2	2	0	2	2	0	2	0	2	0	0	0	2	0
BS00029346_51	0	0	2	0	2	0	0	0	-1	2	2	0	0	0	2	2	2	0	0	2	2	2	2	0	0	0	2	0	2	0	0	0	2	2	0	2	2	0	2	2	0	2	-1	-1	0	0	0	2	0
wsnp_CAP12_c2438_1180601	0	0	2	0	2	0	0	0	0	2	2	0	0	0	2	2	2	0	0	2	2	2	2	0	0	0	2	0	2	0	0	0	2	2	0	2	2	0	2	2	0	2	0	2	0	0	0	2	0
IAAV5652	0	0	2	0	2	0	0	0	-1	2	2	0	0	0	2	2	2	0	0	2	2	2	2	0	0	0	2	0	2	0	0	0	2	2	0	2	2	0	2	2	0	2	0	-1	0	0	0	2	0
RAC875_c826_2186	0	0	2	0	2	0	0	0	0	2	2	0	0	0	2	2	2	0	0	2	2	2	2	0	0	0	2	0	2	0	0	0	2	2	0	2	2	0	2	2	0	2	0	-1	0	0	0	2	0
BS00012210_51	0	-1	2	0	2	0	0	0	-1	2	2	0	0	-1	2	2	2	0	0	2	2	2	2	0	0	0	2	0	2	-1	0	0	2	2	0	2	2	0	2	2	0	2	-1	-1	0	0	0	2	0
wsnp_Ex_c2181_4089788	0	0	2	0	0	0	0	0	0	2	2	0	0	0	2	0	2	0	0	2	2	2	2	0	0	0	2	0	2	0	0	0	2	2	0	2	2	0	2	2	0	2	0	2	0	2	0	2	0
wsnp_Ex_c3253_5994376	0	0	2	0	0	0	0	0	0	2	2	0	0	0	2	0	2	0	0	2	2	2	2	0	0	0	2	0	2	0	0	0	2	2	0	2	2	0	2	2	0	2	0	2	0	2	0	2	0
Ra_c30689_939	0	0	2	0	0	0	0	0	0	2	2	0	0	0	-1	0	2	0	0	2	2	2	2	0	0	0	2	0	2	0	0	0	2	2	0	2	2	0	2	2	0	2	0	2	0	2	0	2	0
wsnp_CAP11_c23_61357	0	-1	2	0	0	0	-1	0	0	2	2	0	0	0	-1	0	2	0	0	2	2	2	2	0	0	0	2	0	2	0	0	0	2	2	0	2	2	0	2	2	0	2	-1	-1	0	2	0	2	0
wsnp_Ex_c24686_33942264	0	-1	2	0	0	0	-1	0	0	2	2	0	0	0	-1	0	2	0	0	2	2	2	2	0	0	0	2	0	2	0	0	0	2	2	0	2	2	0	2	2	0	2	-1	-1	0	2	0	2	0
wsnp_Ex_c24686_33941368	0	0	2	0	0	0	0	0	0	2	2	0	0	0	2	0	2	0	0	2	2	2	2	0	0	0	2	0	2	0	0	0	2	2	0	2	2	0	2	2	0	2	0	2	0	2	0	2	0
wsnp_Ex_c2181_4089639	0	-1	2	0	0	0	-1	0	0	2	2	0	0	0	2	0	2	0	0	2	2	2	2	0	0	0	2	0	2	0	0	0	2	2	0	2	2	0	2	2	0	2	-1	2	0	2	0	2	0
RAC875_c37183_331	0	0	2	0	0	0	0	0	0	2	2	0	0	0	2	0	2	0	0	2	2	2	2	0	0	0	2	0	2	0	0	0	2	2	0	2	2	0	2	2	0	2	0	2	0	2	0	2	0
IAAV4243	0	-1	2	0	0	0	-1	0	0	2	2	0	0	0	2	0	2	0	0	2	2	2	2	0	0	0	2	0	2	0	0	0	2	2	0	2	2	0	2	2	0	2	-1	-1	0	2	0	2	0
BS00087437_51	0	0	2	0	0	0	0	0	0	2	2	0	0	0	2	0	2	0	0	2	2	2	2	0	0	0	2	0	2	0	0	0	2	2	0	2	2	0	2	2	0	2	0	2	0	2	0	2	0
RAC875_c19509_174	0	0	2	0	0	0	0	0	0	2	2	0	0	0	-1	0	2	0	0	2	2	2	2	0	0	0	2	0	2	0	0	0	2	2	0	2	2	0	2	2	0	2	0	-1	0	2	0	2	0
GENE-0431_573	0	0	2	0	0	0	0	0	0	2	2	0	0	0	2	0	2	0	0	2	2	2	2	0	0	0	2	0	2	0	0	0	2	2	0	2	2	0	2	2	0	2	0	2	0	2	0	2	0
GENE-0431_601	0	0	2	0	0	0	0	0	0	2	2	0	0	0	-1	0	2	0	0	2	2	2	2	0	0	0	2	0	2	0	0	0	2	2	0	2	2	0	2	2	0	2	0	2	0	2	0	2	0
Kukri_rep_c69903_1525	0	0	2	0	0	0	0	0	0	2	2	0	0	0	2	0	2	0	0	2	2	2	2	0	0	0	2	0	2	0	0	0	2	2	0	2	0	0	2	2	0	0	0	2	0	2	0	2	0
Kukri_c8422_642	0	0	2	0	0	0	0	0	0	2	2	0	0	-1	2	0	2	0	0	2	2	2	2	0	0	0	2	0	2	0	0	0	2	2	0	2	0	0	2	2	0	0	0	-1	0	2	0	2	0
Kukri_c8332_120	0	0	2	0	0	0	0	0	0	2	2	0	0	2	2	0	2	0	0	2	2	2	2	0	0	0	2	0	2	0	0	0	2	2	0	2	0	0	2	2	0	0	0	2	0	2	0	2	0
Excalibur_c16292_1338	0	-1	2	0	0	0	0	0	0	2	2	0	0	-1	-1	0	2	0	0	2	2	2	2	0	0	0	2	0	2	0	0	0	2	2	0	2	0	0	2	2	0	0	0	-1	0	2	0	2	0
Excalibur_rep_c84731_611	0	0	2	0	0	0	0	0	0	2	2	0	0	-1	2	0	2	0	0	2	2	2	2	0	0	0	2	0	2	0	0	0	2	2	0	2	0	0	2	2	0	0	0	2	0	2	0	2	0
GENE-0491_632	0	-1	2	0	0	0	0	0	0	2	2	0	0	-1	-1	0	2	0	0	2	2	2	2	0	0	0	2	0	2	0	0	0	2	2	0	2	0	0	2	2	0	0	0	-1	0	2	0	2	0
IAAV9050	0	-1	2	0	2	0	0	0	0	2	2	0	0	-1	2	0	2	0	0	2	2	2	2	0	2	0	2	0	2	0	2	0	2	2	0	2	0	0	0	2	0	0	0	-1	0	2	0	2	0
BS00021719_51	0	-1	2	0	2	0	0	0	0	2	2	0	0	-1	-1	0	2	0	0	2	2	2	2	0	2	0	2	0	2	0	2	0	2	2	0	2	0	0	0	2	0	0	0	-1	0	2	0	2	0
wsnp_Ra_c32175_41221223	0	-1	2	0	2	0	0	0	0	2	2	0	0	-1	2	0	2	0	0	2	2	2	2	0	2	0	2	0	2	0	2	0	2	2	0	2	0	0	0	2	0	0	0	-1	0	2	0	2	0
wsnp_Ex_c4310_7770452	0	-1	2	0	2	0	0	0	0	2	2	0	0	2	2	0	2	0	0	2	2	2	2	0	2	0	2	0	2	0	2	0	2	2	0	2	0	0	0	2	0	0	0	2	0	2	0	2	0
Excalibur_c59894_97	0	-1	2	0	2	0	0	0	0	2	2	0	0	-1	-1	0	2	0	0	2	2	2	2	0	2	0	2	0	2	0	2	0	2	2	0	2	0	0	0	2	0	0	0	-1	0	2	0	2	0
BobWhite_c37935_124	0	-1	2	0	2	0	0	0	0	2	2	0	0	-1	2	0	2	0	0	2	2	2	2	0	2	0	2	0	2	0	2	0	2	2	0	2	0	0	0	2	0	0	0	-1	0	2	0	2	0
IACX18883	0	-1	2	0	2	0	0	0	0	2	2	0	0	-1	-1	0	2	0	0	2	2	2	2	0	2	0	2	0	2	0	2	0	2	2	0	2	0	0	0	2	0	0	0	-1	0	2	0	2	0
Excalibur_c13489_867	0	2	2	0	2	0	0	0	0	2	2	0	0	2	2	0	2	0	0	2	2	2	2	0	2	0	2	0	2	0	2	0	2	2	0	2	0	0	0	2	0	0	0	2	0	2	0	2	0
tplb0059e14_515	0	-1	2	0	2	0	0	0	0	2	2	0	0	-1	-1	0	2	0	0	2	2	2	2	0	2	0	2	0	2	0	2	0	2	2	0	2	0	0	0	2	0	0	0	-1	0	2	0	2	0
Kukri_c35200_895	0	0	2	0	2	0	0	0	0	2	2	0	0	-1	-1	0	2	0	0	2	2	2	2	0	2	0	2	0	2	0	2	0	2	2	0	2	0	0	0	2	0	0	0	-1	0	2	0	2	0
Kukri_c20672_360	0	-1	2	0	2	0	0	0	0	2	2	0	0	-1	-1	0	2	0	0	2	2	2	2	0	2	0	2	0	2	0	2	0	2	2	0	2	0	0	0	2	0	0	0	2	0	2	0	2	0
RAC875_c86680_391	0	0	2	0	2	0	0	0	0	2	2	0	0	-1	-1	0	2	0	0	2	2	2	2	0	2	0	2	0	2	0	2	0	2	2	0	2	0	0	0	2	0	0	0	-1	0	2	0	2	0
Kukri_c88698_296	0	0	2	0	2	0	0	0	0	2	2	0	0	-1	-1	0	2	0	0	2	2	2	2	0	2	0	2	0	2	0	2	0	2	2	0	2	0	0	0	2	0	0	0	-1	0	2	0	2	0
BobWhite_c38865_319	0	0	2	0	2	0	0	0	0	2	2	0	0	0	2	0	2	0	0	2	2	2	2	0	2	0	2	0	2	0	2	0	2	2	0	2	0	0	0	2	0	0	0	2	0	2	0	2	0
RAC875_c21625_246	0	0	2	0	2	0	0	0	0	2	2	0	0	-1	-1	0	2	0	0	2	2	2	2	0	2	0	2	0	2	0	2	0	2	2	0	2	0	0	0	2	0	0	0	-1	0	2	0	2	0
Excalibur_c13183_128	0	-1	2	0	2	0	0	0	0	2	2	0	0	-1	-1	0	2	-1	0	2	2	2	2	0	2	0	2	0	2	0	2	0	2	2	0	2	0	0	0	2	0	0	0	-1	0	2	0	2	0
Ra_c58315_265	0	-1	2	0	2	0	0	0	0	2	2	0	0	-1	-1	0	2	0	0	2	2	2	2	0	2	0	2	0	2	0	2	0	2	2	0	2	0	0	0	2	0	0	0	-1	0	2	0	2	0
IACX3496	0	-1	2	0	2	0	0	0	0	2	2	0	0	-1	-1	0	2	0	0	2	2	2	2	0	2	0	2	0	2	0	2	0	2	2	0	2	0	0	0	2	0	0	0	-1	0	2	0	2	0
BS00033469_51	0	0	2	0	2	0	0	0	0	2	2	0	0	0	2	0	2	0	0	2	2	2	2	0	2	0	2	0	2	0	2	0	2	2	0	2	0	0	0	2	0	0	0	-1	0	2	0	2	0
wsnp_Ex_c56097_58352130	0	0	2	0	2	0	0	0	0	2	2	0	0	-1	2	0	2	0	0	2	2	2	2	0	2	0	2	0	2	0	2	0	2	2	0	2	0	0	0	2	0	0	0	2	0	2	0	2	0
RAC875_c41275_131	0	-1	2	0	2	0	0	0	0	2	2	0	0	-1	-1	0	2	0	0	2	2	2	2	0	2	0	2	0	2	0	2	0	2	2	0	2	0	0	0	2	0	0	0	-1	0	2	0	2	0
RAC875_c23158_301	0	0	2	0	2	0	0	0	0	2	2	0	0	-1	2	0	2	0	0	2	2	2	2	0	2	0	2	0	2	0	2	0	2	2	0	2	0	0	0	2	0	0	0	2	0	2	0	2	0
Kukri_c10453_875	0	0	2	0	2	0	0	0	0	2	2	0	0	0	2	0	2	0	0	2	2	2	2	0	2	0	2	0	2	0	2	0	2	2	0	2	0	0	0	2	0	0	0	2	0	2	0	2	0
Excalibur_c56097_168	0	-1	2	0	2	0	0	0	0	2	2	0	0	2	2	0	2	0	0	2	2	2	2	0	2	0	2	0	2	0	2	0	2	2	0	2	0	0	0	2	0	0	0	-1	0	2	0	2	0
wsnp_Ra_c12148_19539667	0	-1	2	0	2	0	0	0	0	2	2	0	0	-1	2	0	2	2	0	2	2	2	2	0	2	0	2	0	2	0	2	0	2	2	0	2	0	0	0	2	0	0	0	2	0	2	0	2	0
wsnp_Ku_c24239_34199356	0	-1	2	0	2	0	0	0	0	2	2	0	0	-1	-1	0	2	2	0	2	2	2	2	0	2	0	2	0	2	0	2	0	2	2	0	2	0	0	0	2	0	0	0	-1	0	2	0	2	0
wsnp_Ku_c21356_31093507	0	-1	2	0	2	0	0	0	0	2	2	0	0	-1	-1	0	2	2	0	2	2	2	2	0	2	0	2	0	2	-1	2	0	2	2	0	2	0	0	0	2	0	0	0	-1	0	2	0	2	0
wsnp_Ex_c5192_9203682	0	-1	2	0	2	0	0	0	0	2	2	0	0	-1	-1	0	2	2	0	2	2	2	2	0	2	0	2	0	2	0	2	0	2	2	0	2	0	0	0	2	0	0	0	-1	0	2	0	2	0
wsnp_Ex_c5192_9203100	0	-1	2	0	2	0	0	0	0	2	2	0	0	-1	2	0	2	2	0	2	2	2	2	0	2	0	2	0	2	0	2	0	2	2	0	2	0	0	0	2	0	0	0	2	0	2	0	2	0
wsnp_Ex_c12336_19686808	0	-1	2	0	2	0	0	0	0	2	2	0	0	-1	-1	0	2	2	0	2	2	2	2	0	2	0	2	0	2	0	2	0	2	2	0	2	0	0	0	2	0	0	0	-1	0	2	0	2	0
wsnp_BE495786A_Ta_2_1	0	-1	2	0	2	0	0	0	0	2	2	0	0	-1	-1	0	2	2	0	2	2	2	2	0	2	0	2	0	2	0	2	0	2	2	0	2	0	0	0	2	0	0	0	-1	0	2	0	2	0
RFL_Contig3203_1971	0	-1	2	0	2	0	0	0	0	2	2	0	0	-1	-1	0	2	2	0	2	2	2	2	0	2	0	2	0	2	0	2	0	2	2	0	2	0	0	0	2	0	0	0	-1	0	2	0	2	0
RAC875_c53185_802	0	-1	2	0	2	0	0	0	0	2	2	0	0	-1	2	0	2	2	0	2	2	2	2	0	2	0	2	0	2	0	2	0	2	2	0	2	0	0	0	2	0	0	0	-1	0	2	0	2	0
IACX662	0	-1	2	0	2	0	0	0	0	2	2	0	0	-1	-1	0	2	2	0	2	2	2	2	0	2	0	2	0	2	0	2	0	2	2	0	2	0	0	0	2	0	0	0	-1	0	2	0	2	0
IACX4378	0	-1	2	0	2	0	0	0	0	2	2	0	0	-1	2	0	2	2	0	2	2	2	2	0	2	0	2	0	2	0	2	0	2	2	0	2	0	0	0	2	0	0	0	2	0	2	0	2	0
Excalibur_rep_c112145_271	0	-1	2	0	2	0	0	0	0	2	2	0	0	-1	-1	0	2	2	0	2	2	2	2	0	2	0	2	0	2	0	2	0	2	2	0	2	0	0	0	2	0	0	0	-1	0	2	0	2	0
Excalibur_c30591_637	0	-1	2	0	2	0	0	0	0	2	2	0	0	-1	2	0	2	2	0	2	2	2	2	0	2	0	2	0	2	0	2	0	2	2	0	2	0	0	0	2	0	0	0	-1	0	2	0	2	0
Ex_c5192_943	0	-1	2	0	2	0	0	0	0	2	2	0	0	-1	-1	0	2	2	0	2	2	2	2	0	2	0	2	0	2	0	2	0	2	2	0	2	0	0	0	2	0	0	0	-1	0	2	0	2	0
BS00087600_51	0	-1	2	0	2	0	0	0	0	2	2	0	0	-1	2	0	2	2	0	2	2	2	2	0	2	0	2	0	2	0	2	0	2	2	0	2	0	0	0	2	0	0	0	-1	0	2	0	2	0
BS00067421_51	0	-1	2	0	2	0	0	0	0	2	2	0	0	-1	-1	0	2	2	0	2	2	2	2	0	2	0	2	0	2	0	2	0	2	2	0	2	0	0	0	2	0	0	0	-1	0	2	0	2	0
BS00022698_51	0	-1	2	0	2	0	0	0	0	2	2	0	0	-1	-1	0	2	2	0	2	2	2	2	0	2	0	2	0	2	0	2	0	2	2	0	2	0	0	0	2	0	0	0	-1	0	2	0	2	0
RAC875_c31276_1128	0	-1	2	0	2	0	0	0	0	2	2	0	0	2	2	0	2	2	0	2	2	2	2	0	2	0	2	0	2	0	2	0	2	2	0	2	0	0	0	2	0	0	0	2	0	2	0	2	0
GENE-0004_635	0	-1	2	0	2	0	0	0	0	2	2	0	0	-1	2	0	2	2	0	2	2	2	2	0	2	0	2	0	2	0	2	0	2	2	0	2	0	0	0	2	0	0	0	2	0	2	0	2	0
CAP11_c1972_285	0	-1	2	0	2	0	0	0	0	2	2	0	0	-1	-1	0	2	2	0	2	2	2	2	0	2	0	2	0	2	0	2	0	2	2	0	2	0	0	0	2	0	0	0	-1	0	2	0	2	0
BS00021889_51	0	2	2	0	2	0	0	0	0	2	2	0	0	2	2	0	2	2	0	2	2	2	2	0	2	0	2	0	2	0	2	0	2	2	0	2	0	0	0	2	0	0	0	-1	0	2	0	2	0
wsnp_Ex_c534_1058778	0	0	2	0	2	0	0	0	0	2	2	0	0	-1	2	0	2	2	0	2	2	2	2	0	2	0	2	0	2	0	2	0	2	2	0	2	0	0	0	2	0	0	0	2	0	2	0	2	0
wsnp_Ex_c27940_37101775	0	0	2	0	2	0	0	0	0	2	2	0	0	-1	-1	0	2	2	0	2	2	2	2	0	2	0	2	0	2	0	2	0	2	2	0	2	0	0	0	2	0	0	0	-1	0	2	0	2	0
Kukri_c3582_87	0	0	2	0	2	0	0	0	0	2	2	0	0	0	-1	0	2	2	0	2	2	2	2	0	2	0	2	0	2	0	2	0	2	2	0	2	0	0	0	2	0	0	0	-1	0	2	0	2	0
Kukri_c27785_400	0	0	2	0	2	0	0	0	0	2	2	0	0	0	-1	0	2	2	0	2	2	2	2	0	2	0	2	0	2	0	2	0	2	2	0	2	0	0	0	2	0	0	0	2	0	2	0	2	0
BS00033262_51	0	0	2	0	2	0	0	0	0	2	2	0	0	0	-1	0	2	2	0	2	2	2	2	0	2	0	2	0	2	0	2	0	2	2	0	2	0	0	0	2	0	0	0	-1	0	2	0	2	0
BS00023101_51	0	0	2	0	2	0	0	0	0	2	2	0	0	-1	-1	0	2	2	0	2	2	2	2	0	2	0	2	0	2	0	2	0	2	2	0	2	0	0	0	2	0	0	0	-1	0	2	0	2	0
wsnp_Ex_c5216_9235964	0	0	2	0	2	0	0	0	0	2	2	0	0	0	-1	0	2	2	0	2	2	2	2	0	2	0	2	0	2	0	2	0	2	2	0	2	0	0	0	2	0	0	0	-1	0	2	0	2	0
IAAV3049	0	0	2	0	2	0	0	0	0	2	2	0	0	-1	-1	0	2	2	0	2	2	2	2	0	2	0	2	0	2	0	2	0	2	2	0	2	0	0	0	2	0	0	0	-1	0	2	0	2	0
GENE-0112_64	0	0	2	0	2	0	0	0	0	2	2	0	0	0	-1	0	2	2	0	2	2	2	2	0	2	0	2	0	2	0	2	0	2	2	0	2	0	0	0	2	0	0	0	-1	0	2	0	2	0
Excalibur_c7033_159	0	0	2	0	2	0	0	0	0	2	2	0	0	0	2	0	2	2	0	2	2	2	2	0	2	0	2	0	2	0	2	0	2	2	0	2	0	0	0	2	0	0	0	2	0	2	0	2	0
wsnp_Ex_c21336_30465618	0	0	2	0	2	0	0	0	0	2	2	0	0	0	2	0	2	2	0	2	2	2	2	0	2	0	2	0	2	0	2	0	2	2	0	2	0	0	0	2	0	0	2	2	0	2	0	0	0
RAC875_c23081_141	0	-1	2	0	2	0	0	0	0	2	2	0	0	-1	-1	0	2	2	0	2	2	2	2	0	2	0	2	0	2	0	2	0	2	2	0	2	0	0	0	2	0	0	2	-1	0	2	0	0	0
wsnp_Ex_c21193_30320134	0	0	2	0	2	0	0	0	0	2	2	0	0	2	2	0	2	2	0	2	2	2	2	0	2	0	2	0	2	0	2	0	2	2	0	2	0	0	0	2	0	0	2	2	0	2	0	0	0
Excalibur_c34697_831	0	0	2	0	2	0	0	0	0	2	2	0	0	0	2	0	2	2	0	2	2	2	2	0	2	0	2	0	2	0	2	0	2	2	0	2	0	0	0	2	0	0	2	2	0	2	0	0	0
BobWhite_c12568_900	0	-1	2	0	2	0	0	0	0	2	2	0	0	-1	-1	0	2	2	0	2	2	2	2	0	2	0	2	0	2	0	2	0	2	2	0	2	0	0	0	2	0	0	2	-1	0	2	0	0	0
BS00065843_51	0	0	2	0	2	0	0	0	0	2	2	0	0	2	0	0	2	2	0	2	2	2	2	0	2	0	2	0	2	0	2	0	2	2	0	2	0	0	0	2	0	0	0	2	0	2	0	0	0
BS00092585_51	0	0	2	0	2	0	0	0	0	2	2	0	0	-1	-1	0	2	2	0	2	2	2	2	0	2	0	2	0	2	0	2	0	2	2	0	2	0	0	0	2	0	0	0	-1	0	2	0	0	0
wsnp_Ra_c4664_8410628	0	-1	2	0	2	0	0	0	0	2	2	0	0	-1	-1	0	2	2	0	2	2	2	2	0	2	0	2	0	2	0	2	0	2	2	0	2	0	0	0	2	0	0	0	-1	0	2	0	0	0
wsnp_Ku_c16913_25885872	0	0	2	0	2	0	0	0	0	2	2	0	0	0	-1	0	2	2	0	2	2	2	2	0	2	0	2	0	2	0	2	0	2	2	0	2	0	0	0	2	0	0	0	-1	0	2	0	0	0
wsnp_Ex_rep_c105443_89868548	0	-1	2	0	2	0	0	0	0	2	2	0	0	2	2	0	2	2	0	2	2	2	2	0	2	0	2	0	2	0	2	0	2	2	0	2	0	0	0	2	0	0	0	2	0	2	0	0	0
wsnp_Ex_c35821_43892960	0	-1	2	0	2	0	0	0	0	2	2	0	0	-1	2	0	2	2	0	2	2	2	2	0	2	0	2	0	2	0	2	0	2	2	0	2	0	0	0	2	0	0	0	2	0	2	0	0	0
wsnp_Ex_c19294_28225846	0	-1	2	0	2	0	0	0	0	2	2	0	0	-1	-1	0	2	2	0	2	2	2	2	0	2	0	2	0	2	0	2	0	2	2	0	2	0	0	0	2	0	0	0	-1	0	2	0	0	0
RAC875_c19579_377	0	-1	2	0	2	0	0	0	0	2	2	0	0	-1	2	0	2	2	0	2	2	2	2	0	2	0	2	0	2	0	2	0	2	2	0	2	0	0	0	2	0	0	0	-1	0	2	0	0	0
Ra_c9876_373	0	0	2	0	2	0	0	0	0	2	2	0	0	-1	-1	0	2	2	0	2	2	2	2	0	2	0	2	0	2	0	2	0	2	2	0	2	0	0	0	2	0	0	0	-1	0	2	0	0	0
IACX11338	0	-1	2	0	2	0	0	0	0	2	2	0	0	-1	-1	0	2	2	0	2	2	2	2	0	2	0	2	0	2	0	2	0	2	2	0	2	0	0	0	2	0	0	0	-1	0	2	0	0	0
IAAV8429	0	-1	2	0	2	0	0	0	0	2	2	0	0	-1	2	0	2	2	0	2	2	2	2	0	2	0	2	0	2	0	2	0	2	2	0	2	0	0	0	2	0	0	0	-1	0	2	0	0	0
Ex_c4051_1826	0	-1	2	0	2	0	0	0	0	2	2	0	0	-1	-1	0	2	2	0	2	2	2	2	0	2	0	2	0	2	0	2	0	2	2	0	2	0	0	0	2	0	0	0	-1	0	2	0	0	0
Ex_c16529_304	0	0	2	0	2	0	0	0	0	2	2	0	0	0	-1	0	2	2	0	2	2	2	2	0	2	0	2	0	2	0	2	0	2	2	0	2	0	0	0	2	0	0	0	-1	0	2	0	0	0
BS00032112_51	0	0	2	0	2	0	0	0	0	2	2	0	0	-1	-1	0	2	2	0	2	2	2	2	0	2	0	2	0	2	0	2	0	2	2	0	2	0	0	0	2	0	0	0	-1	0	2	0	0	0
BS00021714_51	0	0	2	0	2	0	0	0	0	2	2	0	0	-1	-1	0	2	2	0	2	2	2	2	0	2	0	2	0	2	0	2	0	2	2	0	2	0	0	0	2	0	0	0	-1	0	2	0	0	0
Kukri_c16913_422	0	-1	2	0	2	0	0	0	0	2	2	0	0	-1	2	0	2	2	0	2	2	2	2	0	2	0	2	0	2	0	2	0	2	2	0	2	0	0	0	2	0	0	0	-1	0	2	0	0	0
GENE-0410_71	0	0	2	0	2	0	0	0	0	2	2	0	0	-1	-1	0	2	2	0	2	2	2	2	0	2	0	2	0	2	0	2	0	2	2	0	2	0	0	0	2	0	0	0	-1	0	2	0	0	0
Excalibur_c35821_61	0	0	2	0	2	0	0	0	0	2	2	0	0	-1	-1	0	2	2	0	2	2	2	2	0	2	0	2	0	2	0	2	0	2	2	0	2	0	0	0	2	0	0	0	-1	0	2	0	0	0
Ex_c105443_895	0	-1	2	0	2	0	0	0	0	2	2	0	0	-1	-1	0	2	2	0	2	2	2	2	0	2	0	2	0	2	0	2	0	2	2	0	2	0	0	0	2	0	0	0	-1	0	2	0	0	0
BobWhite_c38987_641	0	-1	2	2	2	0	0	0	0	2	2	0	-1	0	-1	0	2	2	0	2	2	2	2	0	2	0	2	0	2	0	2	0	2	2	0	2	0	0	0	2	0	0	0	2	2	2	0	0	0
Kukri_rep_c111676_103	0	0	2	2	2	0	0	0	0	2	2	0	0	0	2	0	2	2	0	2	2	2	2	0	2	0	2	0	2	0	2	0	2	2	0	2	0	0	0	2	0	0	0	2	2	2	0	0	0
wsnp_Ra_c3270_6136601	0	0	2	2	2	0	0	0	0	2	2	0	0	0	-1	0	2	2	0	2	2	2	2	0	2	0	2	0	2	0	2	0	2	2	0	2	0	0	0	2	0	0	0	2	2	2	0	0	0
wsnp_Ra_c3270_6136110	0	0	2	2	2	0	0	0	0	2	2	0	0	0	2	0	2	2	0	2	2	2	2	0	2	0	2	0	2	0	2	0	2	2	0	2	0	0	0	2	0	0	0	2	2	2	0	0	0
wsnp_BE445113A_Ta_2_2	0	0	2	2	2	0	0	0	0	2	2	0	0	0	2	0	2	2	0	2	2	2	2	0	2	0	2	0	2	0	2	0	2	2	0	2	0	0	0	2	0	0	0	2	2	2	0	0	0
Kukri_rep_c117029_125	0	0	2	2	2	0	0	0	0	2	2	0	0	0	2	0	2	2	0	2	2	2	2	0	2	0	2	0	2	0	2	0	2	2	0	2	0	0	0	2	0	0	0	2	2	2	0	0	0
IACX5960	0	0	2	2	2	0	0	0	0	2	2	0	0	0	-1	0	2	2	0	2	2	2	2	0	2	0	2	0	2	0	2	0	2	2	0	2	0	0	0	2	0	0	0	2	2	2	0	0	0
IAAV8804	0	0	2	2	2	0	0	0	0	2	2	0	0	0	2	0	2	2	0	2	2	2	2	0	2	0	2	0	2	0	2	0	2	2	0	2	0	0	0	2	0	0	0	2	2	2	0	0	0
TA003955-1138	0	0	2	2	2	0	0	0	0	2	2	0	0	0	-1	0	2	2	0	2	2	2	2	0	2	0	2	0	2	0	2	0	2	2	0	2	0	0	0	2	0	0	0	2	2	2	0	0	0
BobWhite_c29908_113	0	0	2	2	2	0	0	0	0	2	2	0	0	0	-1	0	2	2	0	2	2	2	2	0	2	0	2	0	2	0	2	0	2	2	0	2	0	0	0	2	0	0	0	2	2	2	0	0	0
RAC875_c29540_1109	0	-1	2	2	2	0	0	0	0	2	2	0	0	0	2	0	2	2	0	2	2	2	2	0	2	0	2	0	2	0	2	0	2	2	0	2	0	0	0	2	0	0	0	2	2	2	0	0	2
Kukri_c18413_168	0	0	2	2	2	0	0	0	0	2	2	0	0	0	2	0	2	2	0	2	2	2	2	0	2	0	2	0	2	0	2	0	2	2	0	2	0	0	0	2	0	0	0	2	2	2	0	0	2
Excalibur_c65437_104	0	0	2	2	2	0	0	0	0	2	2	0	0	0	0	0	2	2	0	2	2	2	2	0	2	0	2	0	2	0	2	0	2	2	0	2	0	0	0	2	0	0	0	2	2	2	0	0	2
Excalibur_c3475_903	0	0	2	2	2	0	0	0	0	2	2	0	0	0	-1	0	2	2	0	2	2	2	2	0	2	0	2	0	2	0	2	0	2	2	0	2	0	0	0	2	0	0	0	2	2	2	0	0	2
wsnp_Ra_c11877_19161832	0	-1	2	2	2	0	0	0	0	2	2	0	-1	0	-1	0	2	2	0	2	2	2	2	0	2	0	2	0	2	0	2	0	2	2	0	2	0	0	0	2	0	0	0	2	2	2	0	0	2
wsnp_BG314157A_Ta_2_1	0	-1	2	2	2	0	0	0	0	2	2	0	-1	0	-1	0	2	2	0	2	2	2	2	0	2	0	2	0	2	0	2	0	2	2	0	2	0	0	0	2	0	0	0	2	2	2	0	0	2
RFL_Contig22_617	0	-1	2	2	2	0	0	0	0	2	2	0	0	0	-1	0	2	2	0	2	2	2	2	0	2	0	2	0	2	0	2	0	2	2	0	2	0	0	0	2	0	0	0	2	2	2	0	0	2
RAC875_c60514_90	0	0	2	2	2	0	0	0	0	2	2	0	0	0	-1	0	2	2	0	2	2	2	2	0	2	0	2	0	2	0	2	0	2	2	0	2	0	0	0	2	0	0	0	2	2	2	0	0	2
RAC875_c49074_374	0	-1	2	2	2	0	0	0	0	2	2	0	-1	0	-1	0	2	2	0	2	2	2	2	0	2	0	2	0	2	0	2	0	2	2	0	2	0	0	0	2	0	0	0	2	2	2	0	0	2
RAC875_c27417_150	0	-1	2	2	2	0	0	0	0	2	2	0	-1	0	-1	0	2	2	0	2	2	2	2	0	2	0	2	0	2	0	2	0	2	2	0	2	0	0	0	2	0	0	0	2	2	2	0	0	2
Kukri_c53153_92	0	-1	2	2	2	0	0	0	0	2	2	-1	-1	0	-1	0	2	2	0	2	2	2	2	0	2	0	2	0	2	0	2	0	2	2	0	2	0	0	0	2	0	-1	-1	2	2	2	0	0	2
Kukri_c43410_348	0	-1	2	2	2	0	0	0	0	2	2	0	-1	0	-1	0	2	2	0	2	2	2	2	0	2	0	2	0	2	0	2	0	2	2	0	2	0	0	0	2	0	0	0	2	2	2	0	0	2
BS00065324_51	0	-1	2	2	2	0	0	0	0	2	2	0	-1	0	-1	0	2	2	0	2	2	2	2	0	2	0	2	0	2	0	2	0	2	2	0	2	0	0	0	2	0	0	0	2	2	2	0	0	2
BS00021728_51	0	-1	2	2	2	0	0	0	0	2	2	0	-1	0	-1	0	2	2	0	2	2	2	2	0	2	0	2	0	2	0	2	0	2	2	0	2	0	0	0	2	0	0	0	2	2	2	0	0	2
Kukri_c58155_786	0	0	2	2	2	0	0	0	0	2	2	0	0	0	-1	0	2	2	0	2	2	2	2	0	2	0	2	0	2	0	2	0	2	2	0	2	0	0	0	2	0	0	0	2	2	2	0	0	2
GENE-0511_403	0	-1	2	2	2	0	0	0	0	2	2	0	-1	0	-1	0	2	2	0	2	2	2	2	0	2	0	2	0	2	0	2	0	2	2	0	2	0	0	0	2	0	0	0	2	2	2	0	0	2
BS00067742_51	0	0	2	2	2	0	0	0	0	2	2	0	0	0	0	0	2	2	0	2	2	2	2	0	2	0	2	0	2	0	2	0	2	2	0	2	0	0	0	2	0	0	0	2	2	2	0	0	2
wsnp_Ex_c6452_11213329	0	-1	2	2	2	0	0	0	0	2	2	0	-1	0	-1	0	2	2	0	2	2	2	2	0	2	0	2	0	2	2	2	0	2	2	0	2	0	0	0	2	0	0	0	2	2	2	0	0	2
wsnp_Ex_c20489_29564938	0	-1	2	2	2	0	0	0	0	2	2	0	-1	0	-1	0	2	2	0	2	2	2	2	0	2	0	2	0	2	2	2	0	2	2	0	2	0	0	0	2	0	0	0	2	2	2	0	0	2
Kukri_c31891_1355	0	-1	2	2	2	0	0	0	0	2	2	0	-1	0	-1	0	2	2	0	2	2	2	2	0	2	0	2	0	2	2	2	0	2	2	0	2	0	0	0	2	0	0	0	2	2	2	0	0	2
Excalibur_c3475_113	0	0	2	2	2	0	0	0	0	2	2	0	0	0	-1	0	2	2	0	2	2	2	2	0	2	0	2	0	2	2	2	0	2	2	0	2	0	0	0	2	0	0	0	2	2	2	0	0	2
BS00030036_51	0	-1	2	2	2	0	0	0	0	2	2	0	-1	0	-1	0	2	2	0	2	2	2	2	0	2	0	2	0	2	2	2	0	2	2	0	2	0	0	0	2	0	0	0	2	2	2	0	0	2
TA003063-0097	0	0	2	2	2	0	0	0	0	2	2	0	0	0	0	0	2	2	0	2	2	2	2	0	2	0	2	0	2	2	2	0	2	2	0	2	0	0	0	2	0	0	0	2	2	2	0	0	2
RAC875_c46551_339	0	0	2	2	2	0	0	0	0	2	2	0	0	0	0	0	2	2	0	2	2	2	2	0	2	0	2	0	2	2	2	0	2	2	0	2	0	0	0	2	0	0	0	2	2	2	0	0	2
Excalibur_c3429_652	0	0	2	2	2	0	0	0	0	2	2	0	0	0	0	0	2	2	0	2	2	2	2	0	2	0	2	0	2	2	2	0	2	2	0	2	0	0	0	2	0	0	0	2	2	2	0	0	2
Tdurum_contig64955_285	0	-1	2	-1	2	0	0	0	0	2	2	0	0	0	-1	0	2	0	0	2	2	2	2	0	2	0	2	0	2	0	2	0	2	2	0	2	0	0	0	2	0	0	0	2	2	0	0	0	2
Tdurum_contig29616_817	0	2	2	2	2	0	0	0	0	2	2	0	0	0	0	0	2	0	0	2	2	2	2	0	2	0	2	0	2	0	2	0	2	2	0	2	0	0	0	2	0	0	0	2	2	0	0	0	2
Tdurum_contig29616_55	0	-1	2	2	2	0	0	0	0	2	2	0	0	0	-1	0	2	0	0	2	2	2	2	0	2	0	2	0	2	0	2	0	2	2	0	2	0	0	0	2	0	0	0	2	2	0	0	0	2
Ku_c103409_52	0	0	2	2	2	0	0	0	0	2	2	0	0	0	0	0	2	0	0	2	2	2	2	0	2	0	2	0	2	0	2	0	2	2	0	2	0	0	0	2	0	0	0	2	2	0	0	0	2
Ex_c30016_192	0	2	2	2	2	0	0	0	0	2	2	0	0	0	0	0	2	0	0	2	2	2	2	0	2	0	2	0	2	0	2	0	2	2	0	2	0	0	0	2	0	0	0	2	2	0	0	0	2
BobWhite_c7337_717	0	-1	2	2	2	0	0	0	0	2	2	0	-1	0	-1	0	2	0	0	2	2	2	2	0	2	0	2	0	2	0	2	0	2	2	0	2	0	0	0	2	0	0	0	2	2	0	0	0	2
BobWhite_c46007_582	0	-1	2	2	2	0	0	0	0	2	2	0	-1	0	-1	0	2	0	0	2	2	2	2	0	2	0	2	0	2	-1	2	0	2	2	0	2	0	0	0	2	0	0	0	2	2	0	0	0	2
Excalibur_c50394_199	0	-1	2	2	2	0	0	0	0	2	2	0	-1	0	-1	0	2	0	0	2	2	2	2	0	2	0	2	0	2	0	2	0	2	2	0	2	0	0	0	2	0	0	0	2	2	0	0	0	2
RAC875_c32979_440	0	0	2	2	2	0	0	0	0	2	2	0	0	0	0	0	2	0	0	2	2	2	2	0	2	0	2	0	2	0	2	0	2	2	0	2	0	0	0	2	0	0	0	2	2	0	0	0	2
wsnp_Ex_c22284_31478675	0	-1	2	2	2	0	0	0	0	2	2	0	0	0	0	0	2	0	0	2	2	2	2	0	2	0	2	0	2	0	2	0	2	2	0	2	0	0	0	2	0	0	0	2	2	0	0	0	2
BS00012525_51	0	-1	2	2	2	0	-1	0	0	2	2	0	0	0	-1	0	2	0	0	2	0	0	2	0	2	0	2	0	2	0	2	0	2	2	0	2	0	0	0	2	0	0	0	2	2	0	0	0	2
wsnp_Ku_c23012_32893918	0	-1	2	2	2	0	-1	0	-1	2	2	0	-1	0	-1	0	2	0	0	2	0	0	2	0	2	0	2	0	2	0	2	0	2	2	0	2	0	0	0	2	0	0	0	2	2	0	0	0	2
RAC875_c80876_67	0	0	2	2	2	0	0	0	0	2	2	0	0	0	0	0	2	0	0	2	0	0	2	0	2	0	2	0	2	0	2	0	2	2	0	2	0	0	0	2	0	0	0	2	2	0	0	0	2
Kukri_c12984_465	0	0	2	2	2	0	0	0	0	2	2	0	0	0	0	0	2	0	0	2	0	0	2	0	2	0	2	0	2	0	2	0	2	2	0	2	0	0	0	2	0	0	0	2	2	0	0	0	2
IAAV6234	0	-1	2	2	2	0	0	0	0	2	2	0	-1	0	-1	0	2	0	0	2	0	0	2	0	2	0	2	0	2	0	2	0	2	2	0	2	0	0	0	2	0	0	0	2	2	0	0	0	2
Excalibur_c44668_382	0	-1	2	2	2	0	-1	0	0	2	2	0	-1	0	-1	0	2	0	0	2	0	0	2	0	2	0	2	0	2	0	2	0	2	2	0	2	0	0	0	2	0	0	0	2	2	0	0	0	2
wsnp_Ex_c1997_3757508	0	0	2	2	2	0	0	0	0	2	2	0	0	0	0	0	2	0	0	2	0	0	2	0	2	0	2	0	2	2	2	0	2	2	0	2	0	0	0	2	0	0	0	2	2	0	0	0	2
wsnp_Ex_c1997_3757415	0	0	2	2	2	0	-1	0	0	2	2	0	0	0	-1	0	2	0	0	2	0	0	2	0	2	0	2	0	2	2	2	0	2	2	0	2	0	0	0	2	0	0	0	2	2	0	0	0	2
wsnp_JD_c6544_7697578	0	-1	2	2	2	0	-1	0	0	2	2	0	-1	0	-1	0	2	0	0	2	0	0	2	0	2	0	2	0	2	2	2	0	2	2	0	2	0	0	0	2	0	0	0	2	2	0	0	0	2
wsnp_JD_c6544_7697412	0	-1	2	2	2	0	-1	0	0	2	2	0	-1	0	-1	0	2	0	0	2	0	0	2	0	2	0	2	0	2	2	2	0	2	2	0	2	0	0	0	2	0	0	0	2	2	0	0	0	2
wsnp_JD_c6544_7697235	0	-1	2	2	2	0	-1	0	0	2	2	0	-1	0	-1	0	2	0	0	2	0	0	2	0	2	0	2	0	2	2	2	0	2	2	0	2	0	0	0	2	0	0	0	2	2	0	0	0	2
wsnp_Ex_c1997_3757721	0	0	2	2	2	0	0	0	0	2	2	0	0	0	0	0	2	0	0	2	0	0	2	0	2	0	2	0	2	2	2	0	2	2	0	2	0	0	0	2	0	0	0	2	2	0	0	0	2
wsnp_Ex_c1997_3757496	0	0	2	2	2	0	0	0	0	2	2	0	0	0	0	0	2	0	0	2	0	0	2	0	2	0	2	0	2	2	2	0	2	2	0	2	0	0	0	2	0	0	0	2	2	0	0	0	2
wsnp_Ex_c1997_3756118	0	0	2	2	2	0	0	0	0	2	2	0	0	0	0	0	2	0	0	2	0	0	2	0	2	0	2	0	2	2	2	0	2	2	0	2	0	0	0	2	0	0	0	2	2	0	0	0	2
wsnp_Ex_c1997_3755945	0	0	2	2	2	0	0	0	0	2	2	0	0	0	0	0	2	0	0	2	0	0	2	0	2	0	2	0	2	2	2	0	2	2	0	2	0	0	0	2	0	0	0	2	2	0	0	0	2
Kukri_rep_c109473_80	0	-1	2	2	2	0	-1	0	0	2	2	0	-1	0	-1	0	2	0	0	2	0	0	2	0	2	0	2	0	2	2	2	0	2	2	0	2	0	0	0	2	0	0	0	2	2	0	0	0	2
Ku_c809_2419	0	0	2	2	2	0	0	0	0	2	2	0	0	0	0	0	2	0	0	2	0	0	2	0	2	0	2	0	2	2	2	0	2	2	0	2	0	0	0	2	0	0	0	2	2	0	0	0	2
Jagger_c5280_407	0	-1	2	2	2	0	-1	0	0	2	2	0	-1	0	-1	0	2	0	0	2	0	0	2	0	2	0	2	0	2	2	2	0	2	2	0	2	0	0	0	2	0	0	0	2	2	0	0	0	2
IAAV2694	0	-1	2	2	2	0	2	0	-1	0	2	0	-1	-1	-1	0	2	0	0	2	0	0	2	0	2	0	2	0	0	2	2	0	2	2	2	0	0	0	0	2	0	0	0	2	2	0	0	0	2
BobWhite_c104_89	0	-1	2	2	2	0	2	0	-1	0	2	0	0	-1	-1	0	2	0	0	2	0	0	2	0	2	0	2	0	0	2	2	0	2	2	2	0	0	0	0	2	0	0	0	2	2	0	0	0	2
Excalibur_c49946_169	0	-1	2	2	2	0	2	0	-1	0	2	0	-1	-1	2	2	2	0	0	2	0	0	2	0	2	0	2	-1	0	2	2	0	2	2	2	0	0	0	0	2	0	0	0	2	2	0	0	0	2
Excalibur_c29605_535	0	-1	2	2	2	0	2	0	-1	0	2	0	0	-1	2	2	2	0	0	2	0	0	2	0	2	0	2	0	0	2	2	0	2	2	2	0	0	0	0	2	0	0	0	2	2	0	0	0	2
BobWhite_c26212_208	0	0	2	2	2	0	2	0	0	0	2	0	0	-1	2	2	2	0	0	2	0	0	2	0	2	0	2	-1	0	2	2	0	2	2	2	0	0	0	0	2	0	0	0	2	2	0	0	0	2
wsnp_BE517729A_Ta_2_1	0	-1	2	2	2	0	2	0	-1	0	2	0	-1	-1	2	2	2	0	0	2	0	0	2	0	2	0	2	2	0	2	2	0	2	2	2	0	0	0	0	2	2	0	0	2	2	0	0	0	2
tplb0031d22_1107	0	0	2	2	2	0	2	0	2	0	2	0	0	2	2	2	2	0	0	2	0	0	2	0	2	0	2	2	0	2	2	0	2	2	2	0	0	0	0	2	2	0	0	2	2	0	0	0	2
BS00009808_51	0	0	2	2	2	0	2	0	-1	0	2	0	-1	-1	2	2	2	0	0	2	0	0	2	0	2	0	2	0	0	2	2	0	2	2	2	0	0	0	0	2	0	0	0	2	2	0	0	0	2
Excalibur_rep_c69456_172	0	0	2	2	2	0	2	0	0	0	2	0	0	0	2	2	2	0	0	2	0	0	2	0	2	0	2	0	0	0	2	0	2	2	2	0	0	0	0	2	0	0	0	2	2	0	0	0	2
wsnp_Ra_c15564_23999084	0	-1	2	2	2	0	2	0	0	0	2	0	-1	-1	2	2	2	0	0	2	0	0	2	0	2	0	2	0	0	-1	2	0	2	2	2	0	0	0	0	2	0	0	0	2	2	0	0	0	2
Excalibur_c7370_179	0	-1	2	2	2	0	2	0	0	0	2	0	-1	0	2	2	2	0	0	2	0	0	2	0	2	0	2	0	0	-1	2	0	2	2	2	0	0	0	0	2	0	0	0	2	2	0	0	0	2
wsnp_BG263358A_Ta_2_3	0	0	2	2	2	0	2	2	0	0	2	0	0	0	2	2	2	0	0	2	0	0	2	0	2	0	2	0	0	0	2	0	2	2	2	0	0	0	0	2	0	0	0	2	2	0	0	0	2
CAP8_c2578_452	0	-1	2	2	2	0	2	2	0	0	2	0	-1	-1	2	2	2	0	0	2	0	0	2	0	2	0	2	0	0	0	2	0	2	2	2	0	0	0	0	2	0	0	0	2	2	0	0	0	2
wsnp_BG263358A_Ta_2_1	0	0	2	2	2	0	2	2	0	0	2	0	0	0	2	2	2	0	0	2	0	0	2	0	2	0	2	0	0	0	2	0	2	2	2	0	0	0	0	2	0	0	0	2	2	0	0	0	2
Kukri_c10405_1277	0	0	2	2	2	0	2	2	0	0	2	0	2	2	2	2	2	0	0	2	0	0	2	0	2	0	2	0	0	0	2	0	2	2	2	0	0	0	0	2	0	0	2	2	2	0	0	0	2
RAC875_rep_c95460_302	0	-1	2	2	2	0	2	2	0	0	2	0	-1	2	2	2	2	0	0	2	0	0	2	0	2	0	2	0	0	0	2	0	2	2	2	0	0	0	0	2	0	0	2	2	2	0	0	0	2
BS00087588_51	0	-1	2	2	2	0	2	2	-1	0	2	0	-1	2	2	2	2	0	0	2	0	0	2	0	2	0	2	0	0	2	2	0	2	2	2	0	0	0	0	2	0	0	-1	2	2	0	0	0	2
IAAV8743	0	0	2	2	2	0	2	2	-1	0	2	0	2	2	2	2	2	0	0	2	0	0	2	0	2	0	2	0	0	2	2	0	2	2	2	0	2	0	0	2	0	0	2	2	2	0	0	0	2
Kukri_c38868_427	0	2	0	2	2	0	2	2	2	0	2	0	2	2	0	2	0	0	2	0	2	2	2	0	0	0	2	0	2	2	0	2	2	2	2	0	0	0	2	2	0	2	2	-1	0	0	2	0	0
BobWhite_c27541_67	0	-1	0	2	2	0	2	2	-1	0	2	0	2	-1	0	2	0	0	2	0	2	2	2	0	0	0	2	0	2	2	0	2	2	2	2	0	0	0	2	2	0	2	2	-1	0	0	2	0	0
IAAV2729	2	2	0	2	2	2	0	2	2	0	2	0	2	2	-1	2	2	0	2	0	2	2	0	0	0	0	2	2	2	2	0	2	2	0	2	2	0	0	2	2	2	2	2	0	0	0	0	0	0
Tdurum_contig56662_54	2	0	2	0	0	2	2	2	-1	0	0	2	2	2	-1	0	0	2	0	2	2	2	0	2	2	2	2	0	0	2	2	2	2	0	0	2	0	2	0	0	0	0	-1	-1	0	-1	2	0	0
Kukri_c44895_139	2	-1	2	0	0	2	2	2	0	0	0	2	2	2	0	0	0	2	0	2	2	2	0	2	2	2	2	0	0	2	2	2	2	0	0	2	0	2	0	0	0	0	2	0	0	0	2	0	-1
Kukri_c44895_88	2	-1	2	0	0	2	2	2	0	0	0	2	2	2	0	0	0	2	0	2	2	2	0	2	2	2	2	0	0	2	2	2	2	0	0	2	0	2	0	0	0	0	2	0	0	0	0	0	0
wsnp_CAP11_rep_c7847_3468669	2	2	2	-1	0	2	2	2	-1	0	0	2	2	2	2	0	0	2	0	2	2	2	0	2	2	2	2	0	0	2	2	2	2	0	0	2	0	2	0	-1	0	0	2	2	0	-1	2	0	0
wsnp_Ku_rep_c109724_94227136	2	-1	2	0	0	2	2	2	-1	0	0	2	2	2	2	0	0	2	0	2	2	2	0	2	2	2	2	0	0	2	2	2	2	0	0	2	0	2	0	0	0	0	2	-1	0	-1	2	0	0
wsnp_Ku_c816_1684613	2	2	2	0	0	2	2	2	-1	0	0	2	2	2	2	0	0	2	0	2	2	2	0	2	2	2	2	0	0	2	2	2	2	0	0	2	0	2	0	0	0	0	2	2	0	0	2	0	0
wsnp_JD_rep_c49006_33254974	2	-1	2	0	0	2	2	2	-1	0	0	2	2	2	-1	0	0	2	0	2	2	2	0	2	2	2	2	0	0	2	2	2	2	0	0	2	0	2	-1	0	0	0	-1	-1	0	-1	2	0	0
wsnp_Ex_c7684_13109335	2	-1	2	0	0	2	2	2	-1	0	0	2	2	2	-1	0	0	2	0	2	2	2	0	2	2	2	2	0	0	2	2	2	2	0	0	2	0	2	0	0	0	0	-1	-1	0	-1	2	0	0
wsnp_Ex_c3264_6017750	2	-1	2	0	0	2	2	2	-1	0	0	2	2	2	-1	0	0	2	0	2	2	2	0	2	2	2	2	0	0	2	2	2	2	0	0	2	0	2	0	0	0	0	-1	-1	0	-1	2	0	0
wsnp_Ex_c28149_37293173	2	2	2	0	0	2	2	2	0	0	0	2	2	2	2	0	0	2	0	2	2	2	0	2	2	2	2	0	0	2	2	2	2	0	0	2	0	2	0	0	0	0	-1	-1	0	-1	2	0	0
wsnp_Ex_c28149_37293117	2	2	2	0	0	2	2	2	0	0	0	2	2	2	-1	0	0	2	0	2	2	2	0	2	2	2	2	0	0	2	2	2	2	0	0	2	0	2	0	0	0	0	2	2	0	0	2	0	0
wsnp_Ex_c23143_32376622	2	2	2	0	0	2	2	2	0	0	0	2	2	2	2	0	0	2	0	2	2	2	0	2	2	2	2	0	0	2	2	2	2	0	0	2	0	2	0	0	0	0	2	2	0	0	2	0	0
wsnp_Ex_c13955_21833712	2	2	2	0	0	2	2	2	-1	0	0	2	2	2	-1	0	0	2	0	2	2	2	0	2	2	2	2	0	0	2	2	2	2	0	0	2	0	2	0	0	0	0	-1	-1	0	-1	2	0	0
Tdurum_contig62584_770	2	2	2	0	0	2	2	2	-1	0	0	2	2	2	-1	0	0	2	0	2	2	2	0	2	2	2	2	0	0	2	2	2	2	0	0	2	0	2	0	0	0	0	-1	-1	0	0	2	0	0
Tdurum_contig51167_915	2	-1	2	0	0	2	2	2	-1	0	0	2	2	2	-1	0	0	2	0	2	2	2	0	2	2	2	2	0	0	2	2	2	2	0	0	2	0	2	0	0	0	0	-1	-1	0	-1	2	0	0
Tdurum_contig51167_810	2	2	2	0	0	2	2	2	2	0	0	2	2	2	2	0	0	2	0	2	2	2	0	2	2	2	2	0	0	2	2	2	2	0	0	2	0	2	0	0	0	0	-1	2	0	-1	2	0	0
Tdurum_contig51167_534	2	-1	2	0	0	2	2	2	-1	0	0	-1	2	2	-1	0	0	-1	0	2	2	2	0	2	2	2	2	0	0	2	2	2	2	0	0	2	0	2	0	0	0	0	-1	-1	0	-1	2	0	0
Tdurum_contig51167_390	2	-1	2	0	0	2	2	2	-1	0	0	2	2	2	-1	0	0	2	0	2	2	2	0	2	2	2	2	0	0	2	2	2	2	0	0	2	0	2	0	0	0	0	-1	-1	0	-1	2	0	0
Tdurum_contig18174_283	2	-1	2	0	0	2	2	2	-1	0	0	2	2	2	2	0	0	2	0	2	2	2	0	2	2	2	2	0	0	2	2	2	2	0	0	2	0	2	0	0	0	0	2	-1	0	-1	2	0	0
RFL_Contig399_1148	2	2	2	0	0	2	2	2	-1	0	0	2	2	2	2	0	0	2	0	2	2	2	0	2	2	2	2	0	0	2	2	2	2	0	0	2	0	2	0	0	0	0	-1	-1	0	-1	2	0	0
RAC875_rep_c71093_1070	2	2	2	0	0	2	2	2	-1	0	0	2	2	2	-1	0	0	2	0	2	2	2	0	2	2	2	2	0	0	2	2	2	2	0	0	2	0	2	0	0	0	0	-1	-1	0	-1	2	0	0
RAC875_c49433_308	2	2	2	0	0	2	2	2	2	0	0	2	2	2	2	0	0	2	0	2	2	2	0	2	2	2	2	0	0	2	2	2	2	0	0	2	0	2	0	0	0	0	2	2	0	0	2	0	0
Ra_c8027_1021	2	2	2	0	0	2	2	2	-1	0	0	2	2	2	2	0	0	2	0	2	2	2	0	2	2	2	2	0	0	2	2	2	2	0	0	2	0	2	0	0	0	0	2	2	0	-1	2	0	0
Kukri_c51781_199	2	-1	2	0	0	2	2	2	-1	0	0	2	2	2	-1	0	0	2	0	2	2	2	0	2	2	2	2	0	0	2	2	2	2	0	0	2	0	2	0	0	0	0	-1	-1	0	0	2	0	0
Kukri_c35030_266	2	-1	2	0	0	2	2	2	0	0	0	2	2	2	-1	0	0	2	0	2	2	2	0	2	2	2	2	0	0	2	2	2	2	0	0	2	0	2	0	0	0	0	-1	-1	0	0	2	0	0
Kukri_c2338_533	2	-1	2	0	0	2	2	2	-1	0	0	2	2	2	-1	0	0	2	0	2	2	2	0	2	2	2	2	0	0	2	2	2	2	0	0	2	0	2	0	0	0	0	-1	-1	0	-1	2	0	0
Kukri_c16271_544	2	2	2	0	0	2	2	2	0	0	0	2	2	2	2	0	0	2	0	2	2	2	0	2	2	2	2	0	0	2	2	2	2	0	0	2	0	2	0	0	0	0	2	2	0	0	2	0	0
Ku_c3523_1959	2	2	2	0	0	2	2	2	0	0	0	2	2	2	2	0	0	2	0	2	2	2	0	2	2	2	2	0	0	2	2	2	2	0	0	2	0	2	0	0	0	0	2	2	0	-1	2	0	0
IAAV5567	2	-1	2	0	0	2	2	2	-1	0	0	2	2	-1	-1	0	0	2	0	2	2	2	0	2	2	2	2	0	0	2	2	2	2	0	0	2	0	2	0	0	0	0	-1	-1	0	-1	2	0	0
CAP12_c8163_118	2	-1	2	0	0	2	2	2	-1	0	0	2	2	2	-1	0	0	2	0	2	2	2	0	2	2	2	2	0	0	2	2	2	2	0	0	2	0	2	0	0	0	0	-1	-1	0	-1	2	0	0
CAP12_c6629_301	2	2	2	0	0	2	2	2	-1	0	0	2	2	2	-1	0	0	2	0	2	2	2	0	2	2	2	2	0	0	2	2	2	2	0	0	2	0	2	0	0	0	0	-1	-1	0	-1	2	0	0
BS00067119_51	2	2	2	0	0	2	2	2	0	0	0	2	2	2	2	0	0	2	0	2	2	2	0	2	2	2	2	0	0	2	2	2	2	0	0	2	0	2	0	0	0	0	2	-1	0	-1	2	0	0
BobWhite_c6820_199	2	-1	2	0	0	2	2	2	-1	0	0	2	2	2	-1	0	0	2	0	2	2	2	0	2	2	2	2	0	0	2	2	2	2	0	0	2	0	2	0	0	0	0	-1	-1	0	-1	2	0	0
BobWhite_c39092_629	2	-1	2	0	0	2	2	2	0	0	0	2	2	2	2	0	0	2	0	2	2	2	0	2	2	2	2	0	0	2	2	2	2	0	0	2	0	2	0	0	0	0	2	-1	0	0	2	0	0
BobWhite_c37358_208	2	-1	2	0	0	2	2	2	-1	0	0	2	2	2	2	0	0	2	0	2	2	2	0	2	2	2	2	0	0	2	2	2	2	0	0	2	0	2	0	0	0	0	-1	-1	0	-1	2	0	0
wsnp_Ex_c10903_17717179	2	2	2	0	0	2	2	2	0	0	0	2	2	2	2	0	0	2	0	2	2	2	0	2	2	2	2	0	0	2	2	2	2	0	0	2	0	2	0	0	0	0	2	2	0	0	2	0	0
TA001430-0733	2	2	2	0	0	2	2	2	-1	0	0	2	2	2	2	0	0	2	0	2	2	2	0	2	2	2	2	0	0	2	2	2	2	0	0	2	0	2	0	0	0	0	2	2	0	-1	2	0	0
RAC875_c48804_590	2	-1	2	0	0	2	2	2	-1	0	0	2	2	2	2	0	0	2	0	2	2	2	0	2	2	2	2	0	0	2	2	2	2	0	0	2	0	2	0	0	0	0	2	2	0	-1	2	0	0
RAC875_c36980_161	2	-1	2	0	0	2	2	2	-1	0	0	2	2	2	2	0	0	2	0	2	2	2	0	2	2	2	2	0	0	2	2	2	2	0	0	2	0	2	0	0	0	0	2	2	0	-1	2	0	0
Kukri_c82086_387	2	2	2	0	0	2	2	2	0	0	0	2	2	2	2	0	0	2	0	2	2	2	0	2	2	2	2	0	0	2	2	2	2	0	0	2	0	2	0	0	0	0	2	2	0	-1	2	0	0
Excalibur_c21534_1436	2	2	2	0	0	2	2	2	-1	0	0	2	2	2	-1	0	0	2	0	2	2	2	0	2	2	2	2	0	0	2	2	2	2	0	0	2	0	2	-1	0	0	0	-1	-1	0	-1	2	0	0
BobWhite_c19182_280	2	2	2	0	0	2	2	2	-1	0	0	2	2	2	-1	0	0	2	0	2	2	2	0	2	2	2	2	0	0	2	2	2	2	0	0	2	0	2	0	0	0	0	-1	-1	0	0	2	0	0
Tdurum_contig8224_378	2	0	2	0	0	2	2	2	0	0	0	2	2	2	2	0	0	2	0	2	2	2	0	2	2	2	2	0	0	2	2	2	2	0	0	2	0	2	0	0	0	0	2	-1	0	0	2	0	0
CAP12_c3758_112	2	0	2	0	0	2	2	2	0	0	0	2	2	2	2	0	0	2	0	2	2	2	0	2	2	2	2	0	0	2	2	2	2	0	0	2	0	2	0	0	0	0	-1	-1	0	0	2	0	0
wsnp_Ex_c30552_39457767	2	0	2	0	0	2	2	2	0	0	0	2	2	2	-1	0	0	2	0	2	2	2	0	2	2	2	2	0	0	2	2	2	2	0	0	2	0	2	0	0	0	0	-1	-1	0	0	2	0	0
BobWhite_c5242_400	2	0	2	0	0	2	2	2	0	0	0	2	2	2	-1	0	0	2	0	2	2	2	0	2	2	2	2	0	0	2	2	2	2	0	0	2	0	2	0	0	0	0	-1	-1	0	-1	2	0	0
wsnp_BF474340A_Ta_2_1	2	0	2	0	0	2	2	2	0	0	0	2	2	2	-1	0	0	2	0	2	2	2	0	2	2	2	2	0	0	2	2	2	2	0	0	2	0	2	0	0	0	0	-1	-1	0	-1	2	0	0
TA002362-0785	2	0	2	0	0	2	2	2	0	0	0	2	2	2	-1	0	0	2	0	2	2	2	0	2	2	2	2	0	0	2	2	2	2	0	0	2	0	2	0	0	0	0	-1	-1	0	0	2	0	0
Excalibur_rep_c96187_541	2	0	2	0	0	2	2	2	0	0	0	2	2	2	2	0	0	2	0	2	2	2	0	2	2	2	2	0	0	2	2	2	2	0	0	2	0	2	0	0	0	0	2	0	0	0	2	0	0
wsnp_Ex_rep_c68171_66944702	2	0	2	0	0	2	2	2	0	0	0	2	2	2	2	0	0	2	0	2	2	2	0	2	2	2	2	0	0	2	2	2	2	0	0	2	0	2	0	0	0	0	2	2	0	0	2	0	0
RAC875_c3057_2297	2	0	2	0	0	2	2	2	2	0	0	2	2	2	2	0	0	2	0	2	2	2	0	2	2	2	2	0	0	2	2	2	2	0	0	2	0	2	0	0	0	0	2	2	0	-1	2	0	0
Tdurum_contig51167_1029	2	0	2	0	0	2	2	2	-1	0	0	2	2	2	-1	0	0	2	0	2	2	2	0	2	2	2	2	0	0	2	2	2	2	0	0	2	0	2	0	0	0	0	-1	-1	0	-1	2	0	0
Excalibur_c16947_81	2	0	2	0	0	2	2	2	2	0	0	2	2	2	2	0	0	2	0	2	2	2	0	2	2	2	2	0	0	2	2	2	2	0	0	2	0	2	0	0	0	0	2	2	0	-1	2	0	0
RAC875_c23586_541	2	0	2	0	0	2	2	2	-1	0	0	2	2	2	2	0	0	2	0	2	2	2	0	2	2	2	2	0	0	2	2	2	2	0	0	2	0	2	0	0	0	0	2	2	0	-1	2	0	0
Ra_c364_50	2	0	2	0	0	2	2	2	2	0	0	2	2	2	2	0	0	2	0	2	2	2	0	2	2	2	2	0	0	2	2	2	2	0	0	2	0	2	0	0	0	0	2	2	0	0	2	0	0
wsnp_Ra_c19637_28840370	2	0	2	0	0	2	2	2	2	0	0	2	2	2	2	0	0	2	0	2	2	2	0	2	2	2	2	0	0	2	2	2	2	0	0	2	0	2	0	0	0	0	2	2	0	2	2	0	0
Tdurum_contig85466_170	2	-1	2	0	0	2	2	2	2	0	0	2	2	2	2	0	0	2	0	2	2	2	0	2	2	2	2	0	0	2	2	2	2	0	0	2	0	2	0	0	0	0	2	-1	0	2	2	0	0
Excalibur_c73970_243	2	0	2	0	0	2	2	2	2	0	0	2	2	2	2	0	0	2	0	2	2	2	0	2	2	2	2	0	0	2	2	2	2	0	0	2	0	2	0	0	0	0	2	2	0	2	2	0	0
RAC875_c16675_580	2	-1	2	0	0	2	2	2	2	0	0	2	2	2	2	0	0	2	0	2	2	2	0	2	2	2	2	0	0	-1	2	2	2	0	2	2	0	2	0	0	0	0	2	2	0	2	2	0	0
wsnp_Ex_c10631_17340809	2	0	2	0	0	2	2	2	-1	0	0	2	2	2	2	0	0	2	0	2	2	2	0	2	2	2	2	0	0	2	2	2	2	0	2	2	0	2	0	0	0	0	2	2	0	-1	2	0	0
GENE-3098_53	2	0	2	0	0	2	2	2	2	0	0	2	2	2	2	0	0	2	0	2	2	2	0	2	2	2	2	0	0	2	2	2	2	0	2	2	0	2	0	0	0	0	2	2	0	0	2	0	0
wsnp_Ra_c36089_44508724	2	-1	2	0	0	2	2	2	-1	0	0	2	2	2	-1	0	0	2	0	2	2	2	0	2	2	2	2	0	0	2	2	2	2	0	2	2	0	2	0	0	0	0	-1	-1	0	-1	2	0	0
wsnp_CAP11_c146_160903	2	-1	2	0	0	2	2	2	-1	0	0	2	2	2	-1	0	0	2	0	2	2	2	0	2	2	2	2	0	0	2	2	2	2	0	2	2	0	2	0	0	0	0	-1	-1	0	-1	2	0	0
Tdurum_contig81011_244	2	-1	2	0	0	2	2	2	-1	0	0	2	2	2	-1	0	0	2	0	2	2	2	0	2	2	2	2	0	0	2	2	2	2	0	2	2	0	2	0	0	0	0	-1	-1	0	-1	2	0	0
RFL_Contig3683_1784	2	-1	2	0	0	2	2	2	-1	0	0	2	2	2	2	0	0	2	0	2	2	2	0	2	2	2	2	0	0	2	2	2	2	0	2	2	0	2	0	0	0	0	2	-1	0	-1	2	0	0
Excalibur_c88792_93	2	-1	2	0	0	2	2	2	-1	0	0	2	2	2	2	0	0	2	0	2	2	2	0	2	2	2	2	0	0	2	2	2	2	0	2	2	0	2	0	0	0	0	2	2	0	-1	2	0	0
Excalibur_c66_147	2	-1	2	0	0	2	2	2	-1	0	0	2	2	2	-1	0	0	2	0	2	2	2	0	2	2	2	2	0	0	2	2	2	2	0	2	2	0	2	0	0	0	0	-1	-1	0	-1	2	0	0
BobWhite_c44164_402	2	-1	2	0	0	2	2	2	-1	0	0	2	2	2	-1	0	0	2	0	2	2	2	0	2	2	2	2	0	0	2	2	2	2	0	2	2	0	2	0	0	0	0	-1	-1	0	-1	2	0	0
BobWhite_c44164_151	2	2	2	0	0	2	2	2	0	0	0	2	2	2	2	0	0	2	0	2	2	2	0	2	2	2	2	0	0	2	2	2	2	0	2	2	0	2	0	0	0	0	2	2	0	0	2	0	0
wsnp_Ex_c9918_16332583	2	-1	2	0	0	2	2	2	0	0	0	2	2	-1	-1	0	0	2	0	2	2	2	0	2	2	2	2	0	0	2	2	2	2	0	2	2	0	2	0	0	0	0	2	-1	0	0	2	0	0
wsnp_Ex_rep_c68058_66805898	2	2	2	0	0	2	2	2	2	0	0	2	2	2	2	0	0	2	0	2	2	2	0	2	2	2	2	0	0	2	2	2	2	0	2	2	0	2	0	0	0	0	2	2	0	0	2	0	0
wsnp_Ex_c9343_15514687	2	-1	2	0	0	2	2	2	0	0	0	2	2	-1	-1	0	0	2	0	2	2	2	0	2	2	2	2	0	0	2	2	2	2	0	2	2	0	2	0	0	0	0	-1	-1	0	0	2	0	0
wsnp_Ex_c9343_15514531	2	-1	2	0	0	2	2	2	0	0	0	2	2	-1	-1	0	0	2	0	2	2	2	0	2	2	2	2	0	0	2	2	2	2	0	2	2	0	2	0	0	0	0	-1	-1	0	0	2	0	0
wsnp_Ex_c25730_34991010	2	-1	2	0	0	2	2	2	-1	0	0	2	2	-1	-1	0	0	2	0	2	2	2	0	2	2	2	2	0	0	2	2	2	2	0	2	2	0	2	0	0	0	0	-1	-1	0	0	2	0	0
RAC875_c52947_338	2	2	2	0	0	2	2	2	-1	0	2	2	2	-1	0	0	0	2	0	2	2	2	0	2	2	2	2	0	2	2	2	2	2	0	2	2	0	2	2	0	0	0	0	-1	0	0	2	0	0
Tdurum_contig84252_155	2	-1	2	0	0	2	2	2	0	0	2	2	2	2	0	0	0	2	0	2	2	2	0	2	2	2	2	0	2	2	2	2	2	0	2	2	0	2	2	0	0	0	0	2	0	0	2	0	0
RAC875_c52947_84	2	0	2	0	0	2	2	2	0	0	2	2	2	2	0	0	0	2	0	2	2	2	0	2	2	2	2	0	2	2	2	2	2	0	2	2	0	2	2	0	0	0	0	-1	0	0	2	0	0
Kukri_c65610_572	2	-1	2	0	0	2	2	2	0	0	2	2	2	2	0	0	0	2	0	2	2	2	0	2	2	2	2	0	2	2	2	2	2	0	2	2	0	2	2	0	0	0	0	2	0	0	2	0	0
Ku_c20664_262	2	-1	2	0	0	2	2	2	0	0	2	2	2	2	0	0	0	2	0	2	2	2	0	2	2	2	2	0	2	2	2	2	2	0	2	2	0	2	2	0	0	0	0	-1	0	0	2	0	0
RAC875_rep_c71278_345	2	-1	2	2	0	0	2	2	0	2	2	2	2	-1	0	0	0	2	0	2	2	2	0	2	2	2	2	0	2	2	2	2	2	0	2	2	0	2	2	0	0	0	-1	2	0	0	0	0	0
wsnp_Ex_c36911_44767554	2	2	2	2	0	0	2	2	-1	2	2	2	2	2	0	0	0	2	0	2	2	2	0	2	2	2	2	0	2	2	2	2	2	0	2	2	0	2	2	0	0	0	2	2	0	0	0	0	0
wsnp_Ex_rep_c103474_88421290	2	2	2	2	0	0	2	2	-1	2	2	2	2	2	0	0	0	2	0	2	2	2	0	2	2	2	2	0	2	2	2	2	2	0	2	2	0	2	2	0	0	0	2	2	0	0	0	0	0
IAAV6100	2	2	2	2	0	0	2	2	2	2	2	2	2	2	0	0	0	2	0	2	2	2	0	2	2	2	2	0	2	2	2	2	2	0	2	2	0	2	2	0	0	0	2	2	0	0	0	0	0
wsnp_Ex_c15377_23637176	2	2	2	2	0	0	2	2	-1	2	2	2	2	2	0	0	0	2	0	2	2	2	0	2	2	2	2	0	2	2	2	2	2	0	2	2	0	2	2	0	0	0	2	2	0	0	0	0	0
Kukri_c17412_1249	2	2	2	2	0	0	2	2	2	2	2	2	2	2	0	0	0	2	0	2	2	2	0	2	2	2	2	0	2	0	2	2	2	0	2	2	0	2	2	0	0	0	2	2	0	0	0	0	0
RAC875_c62550_470	2	-1	2	2	0	0	2	2	0	2	2	2	2	2	0	0	0	2	0	2	2	2	0	2	2	2	2	0	2	0	2	2	2	0	2	2	0	2	2	0	0	0	2	2	0	0	0	0	0
Tdurum_contig52086_129	2	-1	2	2	0	0	2	2	0	2	2	2	2	2	0	0	0	2	0	2	2	2	0	2	0	0	2	0	2	0	0	2	2	0	2	2	0	0	2	0	0	0	2	2	0	0	0	0	0
Excalibur_c10736_1051	2	0	2	2	0	0	2	2	-1	2	2	2	2	-1	0	0	0	2	0	2	2	2	0	2	0	0	2	0	2	-1	0	2	2	0	2	2	0	0	2	0	0	0	2	2	0	0	0	0	0
BS00062759_51	2	-1	2	2	0	0	2	2	0	2	2	2	2	-1	0	0	0	2	0	2	2	2	0	2	0	0	2	0	2	2	0	2	2	0	2	2	0	0	2	0	0	0	-1	-1	0	0	0	0	0
IAAV4435	2	-1	2	0	0	0	2	2	-1	2	2	2	2	-1	0	0	0	2	0	2	2	2	0	2	0	0	2	0	2	2	0	2	2	0	2	2	0	0	2	0	0	0	2	2	2	0	2	0	0
wsnp_Ex_c3887_7051325	2	0	2	0	0	0	2	0	-1	2	2	2	2	2	0	0	0	2	0	0	2	2	0	2	0	0	2	0	2	2	0	2	2	0	2	2	0	0	2	0	0	0	2	2	2	0	2	0	0
BobWhite_c66315_505	2	0	2	0	0	0	2	0	0	2	2	2	2	2	0	0	0	2	0	0	2	2	0	2	0	0	2	0	2	2	0	2	2	0	2	2	0	0	2	0	0	0	2	2	2	0	2	0	0
RAC875_rep_c71921_672	2	0	2	0	0	0	2	0	0	2	2	2	2	2	0	0	0	2	0	0	2	2	0	2	0	0	2	0	2	2	0	2	2	0	2	2	0	0	2	0	0	0	2	2	2	0	2	0	0
CAP11_c1115_150	2	-1	2	0	0	0	2	0	-1	2	2	2	2	2	0	0	0	2	0	0	2	2	0	2	0	0	2	0	2	2	0	2	2	0	2	2	0	0	2	0	0	0	-1	2	2	0	2	0	0
wsnp_Ex_c750_1474300	2	2	2	0	0	0	2	0	0	2	2	2	2	2	0	0	0	2	0	0	2	2	0	2	0	0	2	0	2	2	0	2	2	0	2	2	0	0	2	0	0	0	-1	2	2	0	2	0	0
wsnp_Ex_c46670_52108070	2	-1	2	0	0	0	2	0	0	2	2	2	2	2	0	0	0	2	0	0	2	2	0	2	0	0	2	0	2	2	0	2	2	0	2	2	0	0	2	0	0	0	-1	2	2	0	2	0	0
RFL_Contig858_2219	2	-1	2	0	0	0	2	0	-1	2	2	2	2	2	0	0	0	2	0	0	2	2	0	2	0	0	2	0	2	2	0	2	2	0	2	2	0	0	2	0	0	0	-1	2	2	0	2	0	0
RAC875_c85550_73	2	-1	2	0	0	0	2	0	0	2	2	2	2	-1	0	0	0	2	0	0	2	2	0	2	0	0	2	0	2	2	0	2	2	0	2	2	0	0	2	0	0	0	-1	2	2	0	2	0	0
RAC875_c85550_52	2	-1	2	0	0	0	2	0	-1	2	2	2	2	-1	0	0	0	2	0	0	2	2	0	2	0	0	2	0	2	2	0	2	2	0	2	2	0	0	2	0	0	0	-1	2	2	0	2	0	0
RAC875_c43389_105	2	-1	2	0	0	0	2	0	-1	2	2	2	2	2	0	0	0	2	0	0	2	2	0	2	0	0	2	0	2	2	0	2	2	0	2	2	0	0	2	0	0	0	-1	2	2	0	2	0	0
RAC875_c29059_648	2	-1	2	0	0	0	2	0	0	2	2	2	2	2	0	0	0	2	0	0	2	2	0	2	0	0	2	0	2	2	0	2	2	0	2	2	0	0	2	0	0	0	2	2	2	0	2	0	0
Kukri_c22011_1447	2	-1	2	0	0	0	2	0	-1	2	2	2	2	2	0	0	0	2	0	0	2	2	0	2	0	0	2	0	2	2	0	2	2	0	2	2	0	0	2	0	0	0	2	2	2	0	2	0	0
CAP7_c1295_62	2	-1	2	0	0	0	2	0	-1	2	2	2	2	2	0	0	0	2	0	0	2	2	0	2	0	0	2	0	2	2	0	2	2	0	2	2	0	0	2	0	0	0	-1	2	2	0	2	0	0
CAP11_c5573_163	2	-1	2	0	0	0	2	0	-1	2	2	2	2	2	0	0	0	2	0	0	2	2	0	2	0	0	2	0	2	2	0	2	2	0	2	2	0	0	2	0	0	0	-1	2	2	0	2	0	0
BS00021780_51	2	-1	2	0	0	0	2	0	-1	2	2	2	2	2	0	0	0	2	0	0	2	2	0	2	0	0	2	0	2	2	0	2	2	0	2	2	0	0	2	0	0	0	2	2	2	0	2	0	0
wsnp_Ex_c52086_55808126	2	-1	2	0	0	0	2	0	-1	2	2	2	2	2	0	0	0	2	0	0	2	2	0	2	0	0	2	0	2	2	0	2	2	0	2	2	0	0	2	0	0	0	-1	2	2	0	2	0	0
RFL_Contig2961_1806	2	-1	2	0	0	0	2	0	-1	2	2	2	2	2	0	0	0	2	0	0	2	2	0	2	0	0	2	0	2	2	0	2	2	0	2	2	0	0	2	0	0	0	-1	2	2	0	2	0	0
RAC875_c20823_707	2	2	2	0	0	0	2	0	-1	2	2	2	2	2	0	0	0	2	0	0	2	2	0	2	0	0	2	0	2	2	0	2	2	0	2	2	0	0	2	0	0	0	2	2	2	0	2	0	0
wsnp_Ex_c5412_9565527	2	2	2	2	2	0	2	2	2	0	2	2	2	2	2	0	2	2	0	0	2	2	0	2	0	0	0	2	2	2	0	0	2	2	2	2	2	0	0	2	2	0	2	0	0	2	0	2	0
wsnp_Ex_c5412_9564478	2	2	2	2	2	0	2	2	2	0	2	2	2	2	-1	0	2	2	0	0	2	2	0	2	0	0	0	2	2	2	0	0	2	2	2	2	2	0	0	2	2	0	2	0	0	2	0	2	0
Ra_c58279_702	2	2	2	2	2	0	2	2	2	0	2	2	2	2	2	0	2	2	0	0	2	2	0	2	0	0	0	2	2	2	0	0	2	2	2	2	2	0	0	2	2	0	2	0	0	2	0	2	0
Ra_c58279_684	2	2	2	2	2	0	2	2	2	0	2	2	2	2	2	0	2	2	0	0	2	2	0	2	0	0	0	2	2	2	0	0	2	2	2	2	2	0	0	2	2	0	2	0	0	2	0	2	0
wsnp_Ex_c5412_9564550	2	2	2	2	2	0	2	2	2	0	2	2	2	2	-1	0	2	2	0	0	2	2	0	2	0	0	0	2	2	2	0	0	2	2	2	2	2	0	0	2	2	0	2	0	0	2	0	2	0
wsnp_Ex_c5412_9564346	2	2	2	2	2	0	2	2	2	0	2	2	2	2	2	0	2	2	0	0	2	2	0	2	0	0	0	2	2	2	0	0	2	2	2	2	2	0	0	2	2	0	2	0	0	2	0	2	0
wsnp_Ex_c5412_9564046	2	2	2	2	2	0	2	2	2	0	2	2	2	2	-1	0	2	2	0	0	2	2	0	2	0	0	0	2	2	2	0	0	2	2	2	2	2	0	0	2	2	0	-1	0	0	2	0	2	0
Ra_c10616_265	2	2	2	2	2	0	2	2	2	2	2	2	2	2	-1	0	2	2	0	0	2	2	0	2	0	0	0	2	2	2	0	0	2	2	2	2	2	0	0	2	2	0	2	0	0	2	0	2	0
IAAV7468	2	2	2	2	2	0	2	2	2	2	2	2	2	2	-1	0	2	2	0	0	2	2	0	2	0	0	0	2	2	2	0	0	2	2	2	2	2	0	0	2	2	0	2	0	0	2	0	2	0
Tdurum_contig62138_414	2	2	2	0	2	0	2	2	2	2	2	2	2	2	2	0	2	2	0	0	2	2	0	2	0	0	0	2	2	2	0	0	2	2	2	2	2	0	0	2	2	0	2	0	0	2	0	2	0
Tdurum_contig62138_385	2	2	2	0	2	0	2	2	2	2	2	2	2	2	-1	0	2	2	0	0	2	2	0	2	0	0	0	2	2	2	0	0	2	2	2	2	2	0	0	2	2	0	2	0	0	2	0	2	0
wsnp_Ex_c59373_60260876	2	2	2	0	2	0	2	2	2	2	2	2	2	2	2	0	2	2	0	0	2	2	0	2	0	0	0	2	2	2	0	0	2	2	2	2	2	0	0	2	2	0	2	0	0	2	0	2	0
Excalibur_c51876_189	2	2	2	0	2	0	2	2	2	2	2	2	2	2	2	0	2	2	0	0	2	2	0	2	0	0	0	2	2	2	0	0	2	2	2	2	2	0	0	2	2	0	2	0	0	2	0	2	0
wsnp_Ku_c10302_17079851	2	2	2	0	2	0	2	2	2	2	2	2	2	2	2	0	2	2	0	0	2	2	0	2	0	0	0	2	2	2	0	0	2	2	2	2	2	0	0	2	2	0	2	0	0	2	0	2	0
Excalibur_c25235_1178	2	2	2	0	2	0	2	2	2	2	2	2	2	2	2	0	2	2	0	0	2	2	0	2	0	0	0	2	2	2	0	0	2	2	2	2	2	0	0	2	2	0	2	0	0	2	0	2	0
Excalibur_rep_c105284_131	2	2	2	0	2	0	2	2	2	2	2	2	2	2	2	0	2	2	0	0	2	2	0	2	0	0	0	2	2	2	0	0	2	2	2	2	2	0	0	2	2	0	2	0	0	2	0	2	0
Excalibur_rep_c105284_110	2	2	2	0	2	0	2	2	2	2	2	2	2	2	2	0	2	2	0	0	2	2	0	2	0	0	0	2	2	2	0	0	2	2	2	2	2	0	0	2	2	0	2	0	0	2	0	2	0
BS00066186_51	2	2	2	0	2	0	2	2	2	2	2	2	2	2	-1	0	2	2	0	0	2	2	0	2	0	0	0	2	2	2	0	0	2	2	2	2	2	0	0	2	2	0	2	0	0	2	0	2	0
Excalibur_c61806_213	2	2	2	0	2	0	2	2	2	2	2	2	2	2	2	0	2	2	0	0	2	2	0	2	0	0	0	2	2	2	0	0	2	2	2	2	2	0	0	2	2	0	2	0	0	2	0	2	0
wsnp_JD_rep_c48914_33168544	2	2	2	0	2	0	2	2	2	2	2	2	2	2	2	0	2	2	0	0	2	2	2	2	0	0	0	2	2	2	0	0	2	2	2	2	2	0	0	2	2	0	2	0	0	2	0	2	0
wsnp_Ex_rep_c102538_87682273	2	2	2	2	2	0	2	2	2	2	2	0	0	2	2	0	2	2	2	0	0	0	0	2	0	0	0	0	0	2	0	0	0	0	2	2	2	0	0	2	0	0	2	0	0	2	0	2	0
tplb0041i03_438	2	2	2	2	2	0	2	2	2	2	2	0	0	2	2	0	2	2	2	0	0	0	0	2	0	0	0	0	0	2	0	0	0	0	2	2	2	0	0	2	0	0	2	0	0	2	0	2	0
RAC875_c15213_1942	2	2	2	2	2	0	2	2	2	2	2	0	0	-1	2	0	2	2	2	0	0	0	0	2	0	0	0	0	0	2	0	0	0	0	2	2	2	0	0	2	0	0	2	0	0	2	0	2	0
wsnp_Ex_c28204_37349164	2	2	2	2	2	0	2	2	2	2	2	0	0	-1	-1	0	2	2	2	0	0	0	0	2	0	0	0	0	0	0	0	0	0	0	2	2	2	0	0	2	0	0	2	0	0	0	0	2	0
Kukri_c77188_798	2	2	2	2	2	0	2	2	2	2	2	0	0	2	2	0	2	2	2	0	0	0	0	2	0	0	0	0	0	0	0	0	0	0	2	2	2	0	0	2	0	0	2	0	0	2	0	2	0
BS00022903_51	2	2	2	2	2	0	2	2	-1	2	2	0	0	2	0	0	2	2	2	0	0	0	0	2	0	0	0	0	0	0	0	0	0	0	2	2	2	0	0	2	0	0	2	0	0	2	0	2	0
Ra_c34214_1320	2	2	2	2	2	0	2	2	2	2	2	0	0	2	0	0	2	2	2	0	0	0	0	2	0	0	0	0	0	2	0	0	0	0	2	2	2	0	0	2	0	0	2	0	0	2	0	2	0
GENE-0685_571	2	2	2	2	2	0	2	2	2	2	2	0	0	2	0	0	2	2	2	0	0	0	0	2	0	0	0	0	0	2	0	0	0	0	2	2	2	0	0	2	0	0	2	0	0	2	0	2	0
BS00041816_51	2	2	2	2	2	0	2	2	2	2	2	0	0	2	0	0	2	2	2	0	0	0	0	2	0	0	0	0	0	2	0	0	0	0	2	2	2	0	0	2	0	0	2	0	0	2	0	2	0
CAP12_rep_c7918_56	2	2	2	2	2	0	2	2	2	0	2	0	0	2	0	0	2	2	2	0	0	0	0	2	0	0	0	0	0	2	0	0	0	0	2	2	2	0	0	2	0	0	2	0	0	2	0	2	0
IAAV2718	2	2	2	2	2	0	2	2	2	0	2	0	0	-1	0	0	0	2	2	0	0	0	0	2	0	0	2	0	0	2	0	0	0	0	2	2	2	0	2	2	0	0	-1	0	0	0	0	2	0
BS00093447_51	2	2	2	2	2	0	2	2	2	0	2	0	0	-1	0	0	0	2	2	0	0	0	0	2	0	0	2	0	0	2	0	0	0	0	2	2	2	0	2	2	0	0	2	0	0	0	0	2	0
Kukri_rep_c72243_148	2	2	2	2	2	0	2	2	2	0	2	0	0	0	0	0	0	2	2	0	2	2	0	2	0	0	2	0	0	2	0	0	0	0	2	2	2	0	2	2	0	0	2	0	0	0	0	2	0
wsnp_Ex_rep_c66465_64708722	2	2	2	2	2	0	2	2	2	0	2	0	0	2	0	0	0	2	2	0	2	2	0	2	0	0	2	0	0	2	0	0	0	0	2	2	2	0	2	2	0	0	2	0	0	0	0	2	0
Ra_c5443_527	2	2	2	2	2	0	2	2	2	0	2	0	0	2	0	0	0	2	2	0	2	2	0	2	0	0	2	0	0	2	0	0	0	0	2	2	2	0	2	2	0	0	2	0	0	0	0	2	0
Kukri_rep_c75317_375	2	2	2	2	2	0	2	2	2	0	2	0	0	-1	0	0	0	2	2	0	2	2	0	2	0	0	2	0	0	2	0	0	0	0	2	2	2	0	2	2	0	0	-1	0	0	0	0	2	0
Kukri_rep_c107630_127	2	2	2	2	2	0	2	2	2	0	2	0	0	-1	0	0	0	2	2	0	2	2	0	2	0	0	2	0	0	2	0	0	0	0	2	2	2	0	2	2	0	0	2	0	0	0	0	2	0
BS00065259_51	2	2	2	2	2	0	2	2	2	0	2	0	0	-1	0	0	0	2	2	0	2	2	0	2	0	0	2	0	0	2	0	0	0	0	2	2	2	0	2	2	0	0	2	0	0	0	0	2	0
Excalibur_c27279_699	2	2	2	2	0	0	2	2	2	0	2	0	0	-1	0	0	0	2	2	0	2	2	0	2	0	0	2	0	0	2	0	0	0	0	2	2	2	0	2	2	0	0	-1	0	0	0	0	2	0
Kukri_c44255_832	2	2	2	2	0	0	2	2	2	0	2	0	0	2	0	0	2	2	2	0	2	2	0	2	0	0	2	0	0	0	0	0	0	0	2	2	2	0	2	2	0	0	2	0	0	0	0	0	0
BS00083497_51	2	2	2	2	0	0	2	2	2	0	2	0	0	2	0	0	2	2	2	0	2	2	0	2	0	0	2	0	0	0	0	0	0	0	2	2	2	0	2	2	0	0	2	0	0	0	0	0	0
GENE-3975_114	2	2	2	2	0	0	2	2	2	0	2	0	0	2	0	0	2	2	2	0	2	2	0	2	0	0	2	0	0	0	0	0	0	0	2	2	2	0	2	2	0	0	-1	0	0	0	0	0	0
BS00098423_51	2	2	2	2	0	0	2	2	2	0	2	0	0	2	0	0	2	2	2	0	2	2	0	2	0	0	2	0	0	0	0	0	0	0	2	2	2	0	2	2	0	0	-1	0	0	0	0	0	0
RAC875_c13861_1248	2	2	2	2	0	0	2	2	2	0	2	0	0	2	0	0	2	2	2	0	2	2	0	2	0	0	2	0	0	0	0	0	0	0	2	2	2	0	2	2	0	0	-1	0	0	0	0	0	0
BobWhite_c20952_105	2	2	2	2	0	0	2	2	2	0	2	0	0	-1	0	0	2	2	2	0	2	2	0	2	0	0	2	0	0	0	0	0	0	0	2	2	2	0	2	2	0	0	-1	0	0	0	0	0	0
Excalibur_c40617_983	2	2	2	2	0	0	2	2	2	0	2	0	0	2	0	0	2	2	2	0	2	2	0	2	0	0	2	0	0	0	0	0	0	0	2	2	2	0	2	2	0	0	-1	0	0	0	0	0	0
Tdurum_contig30325_334	2	2	2	2	0	0	2	2	2	0	2	0	0	2	0	0	2	2	2	0	2	2	0	2	0	0	2	0	0	0	0	0	0	0	2	2	2	0	2	2	0	0	2	0	0	0	0	0	0
wsnp_JD_c15127_14676522	2	2	2	2	0	0	2	2	2	0	2	0	0	2	0	0	2	2	2	0	2	2	0	2	0	0	2	0	0	0	0	0	0	0	2	2	2	0	2	2	0	0	-1	0	0	0	0	0	0
Excalibur_c65910_246	2	2	2	-1	0	0	2	2	2	0	2	0	0	2	0	0	2	2	2	0	2	2	0	2	0	2	2	0	2	0	0	0	0	0	2	2	2	2	2	2	0	0	2	0	0	0	0	0	0
wsnp_JD_c169_270144	2	2	2	2	0	0	2	2	2	0	2	0	0	2	0	0	2	2	2	0	2	2	0	2	0	2	2	0	2	0	0	0	0	0	2	2	2	2	2	2	0	0	2	0	0	0	0	0	0
wsnp_BG605368A_Ta_2_4	2	2	2	2	0	0	2	2	2	0	2	0	0	2	0	0	2	2	2	0	2	2	0	2	0	2	2	0	2	0	0	0	0	0	2	2	2	2	2	2	0	0	2	0	0	0	0	0	0
RAC875_rep_c119619_54	2	2	2	2	0	0	2	2	2	0	2	0	0	2	0	0	2	2	2	0	2	2	0	2	0	2	2	0	2	0	0	0	0	0	2	2	2	2	2	2	0	0	2	0	0	0	0	0	0
RAC875_c81899_216	2	2	2	2	0	0	2	2	2	0	2	0	2	2	-1	0	2	2	2	0	2	2	2	2	0	2	2	0	2	2	0	0	0	2	2	2	2	2	2	2	0	0	-1	0	0	0	0	0	0
BobWhite_rep_c64440_83	2	2	2	2	0	0	2	2	2	0	2	0	2	2	2	0	2	2	2	0	2	2	2	2	0	2	2	0	2	2	0	0	0	2	2	2	2	2	2	2	0	0	0	0	0	0	0	0	0
Kukri_c4027_151	2	2	2	2	0	0	2	2	2	0	2	0	2	2	-1	0	2	2	2	0	2	2	2	2	0	2	2	0	2	2	0	0	0	2	2	2	2	2	2	2	0	0	-1	0	0	0	0	0	0
BS00080752_51	2	2	2	2	0	0	2	2	2	0	2	0	2	2	0	0	2	2	2	0	2	2	2	0	0	2	2	0	2	-1	0	0	0	2	2	2	2	2	2	2	0	0	0	0	0	0	0	0	0
BS00094574_51	2	2	2	2	0	0	2	2	2	0	2	0	2	2	0	0	2	2	2	0	2	2	2	0	0	2	2	0	2	2	0	0	0	2	2	2	2	2	2	2	0	0	0	0	0	0	0	0	0
BS00108778_51	2	2	2	2	0	0	2	2	2	0	2	0	2	2	2	0	2	2	2	0	2	2	2	0	0	2	2	0	2	-1	0	0	0	2	2	2	2	2	2	2	0	0	0	0	0	0	0	0	0
BS00080751_51	2	2	2	2	0	0	2	2	2	0	2	0	2	-1	-1	0	2	2	2	0	2	2	2	0	0	2	2	0	2	-1	0	0	0	2	2	2	2	2	2	2	0	0	-1	0	0	0	0	0	0
Kukri_c47259_416	2	2	2	2	0	0	2	2	2	0	2	0	2	2	-1	0	2	2	2	0	2	2	2	0	0	2	2	0	2	2	0	0	0	2	2	2	2	2	2	2	0	0	-1	0	0	0	0	0	0
Tdurum_contig33398_106	2	2	2	2	0	0	2	2	2	0	2	0	2	2	-1	0	2	2	2	0	2	2	2	0	0	2	2	0	2	2	0	0	0	2	2	2	2	2	2	2	0	0	-1	0	0	0	0	0	0
BS00093201_51	2	2	2	2	0	0	2	2	2	0	2	0	2	2	2	0	2	2	2	0	2	2	2	0	0	2	2	0	2	2	0	0	0	2	2	2	2	2	2	2	0	0	-1	0	0	0	0	0	0
BS00081506_51	2	2	2	2	0	0	2	2	2	0	2	0	2	2	2	0	2	2	2	0	2	2	2	0	0	2	2	0	2	-1	0	0	0	2	2	2	2	2	2	2	0	0	-1	0	0	0	0	0	0
RAC875_c16333_340	2	2	2	2	0	0	2	2	2	0	2	0	2	2	-1	0	2	2	2	0	2	2	2	0	0	2	0	0	2	2	0	0	0	2	2	2	2	-1	2	2	0	0	-1	0	0	0	0	0	0
RAC875_rep_c107961_348	2	2	2	2	0	0	0	2	2	0	2	0	2	2	-1	0	2	0	2	0	0	0	2	0	0	0	0	0	2	2	0	0	0	2	2	2	2	0	2	2	0	0	-1	0	0	0	0	0	0
GENE-1908_331	2	2	2	2	0	2	0	2	2	0	2	0	2	2	2	0	2	0	2	0	0	0	2	0	0	0	0	0	2	2	0	0	0	2	2	2	2	0	2	2	0	0	0	0	0	0	2	0	0
Kukri_c25901_348	2	2	2	2	0	0	0	2	2	0	2	0	2	-1	2	0	2	0	2	0	0	0	2	0	0	0	2	2	2	-1	0	2	0	2	2	2	2	0	2	2	2	0	-1	0	0	0	2	0	0
Tdurum_contig4976_1138	2	2	2	2	0	2	0	2	2	2	2	2	2	-1	0	0	2	-1	2	0	0	0	2	0	0	0	2	2	2	2	0	2	0	2	2	2	2	0	2	2	2	0	-1	0	0	0	2	0	0
Tdurum_contig93508_295	2	2	2	2	0	2	0	2	2	2	2	2	2	-1	0	0	2	0	2	0	0	0	2	0	0	0	2	2	2	2	0	2	0	2	2	2	2	0	2	2	2	0	-1	0	0	0	2	0	0
BS00011478_51	2	2	2	2	0	2	0	2	2	2	2	2	2	-1	0	0	2	0	2	0	0	0	2	0	0	0	2	2	2	2	0	2	0	2	2	2	2	0	2	2	2	0	2	0	0	0	2	0	0
BS00022265_51	2	2	2	2	0	2	0	2	2	2	2	2	2	-1	0	0	2	0	2	0	0	0	2	0	0	0	2	2	2	2	0	2	0	2	2	2	2	0	2	2	2	0	-1	0	0	0	2	0	0
Kukri_c65380_351	2	2	2	2	0	0	0	2	2	2	2	2	2	0	0	0	2	0	2	0	0	0	2	0	0	0	2	2	2	0	0	2	0	2	2	2	2	0	2	2	2	0	-1	0	0	0	0	0	0
Excalibur_c33040_447	2	2	2	2	0	0	0	2	2	2	2	2	2	0	0	0	2	0	2	0	0	0	2	0	0	0	2	2	2	-1	0	2	0	2	2	2	2	0	2	2	2	0	2	0	0	0	0	0	0
RFL_Contig741_1380	2	2	2	2	0	0	0	2	2	2	2	2	2	0	0	0	2	0	2	0	0	0	2	0	0	0	2	2	2	-1	0	2	0	2	2	2	2	0	2	2	2	0	2	0	0	0	0	0	0
Kukri_rep_c93878_374	2	2	2	2	0	0	0	2	2	2	2	2	2	0	0	0	2	0	2	0	0	0	2	0	0	0	2	2	2	0	0	2	0	2	2	2	2	0	2	2	2	0	2	0	0	0	0	0	0
Jagger_c4182_117	2	2	2	2	0	0	0	2	2	2	2	2	2	0	0	0	2	0	2	0	0	0	2	0	0	0	2	2	2	0	0	2	0	2	2	2	2	0	2	2	2	0	2	0	0	0	0	0	0
IAAV6905	2	2	2	2	0	0	0	2	2	2	2	2	2	0	0	0	2	0	2	0	0	0	2	0	0	0	2	2	2	0	0	2	0	2	2	2	2	0	2	2	2	0	2	0	0	0	0	0	0
Kukri_c43875_671	2	2	2	2	0	0	0	2	2	2	2	2	2	0	0	0	2	0	2	0	0	-1	2	0	0	0	2	2	2	0	0	2	0	2	2	2	2	0	2	2	2	0	2	0	0	0	0	0	0
wsnp_Ex_c24964_34219020	2	2	2	2	0	0	0	2	2	2	2	2	2	0	2	0	2	0	2	0	0	0	2	0	0	0	2	2	2	-1	0	2	0	2	2	2	2	0	2	2	2	0	2	0	0	0	0	0	0
wsnp_JD_c2578_3489735	2	2	2	2	0	0	0	2	2	2	2	2	2	0	2	0	2	0	2	0	0	0	2	0	0	0	2	2	2	2	0	2	0	2	2	2	2	0	2	2	2	0	2	0	0	0	0	0	0
RAC875_c19904_308	2	2	2	2	0	0	0	2	-1	2	2	2	2	0	2	0	2	0	2	0	0	0	2	0	0	0	2	2	2	2	0	2	0	2	2	2	2	0	2	2	2	0	-1	0	0	0	0	0	0
RAC875_c104160_61	2	2	2	2	0	0	0	2	2	2	2	2	2	0	2	0	2	0	2	0	0	0	2	0	0	0	2	2	2	2	0	2	0	2	2	2	2	0	2	2	2	0	2	0	0	0	0	0	0
Ku_c33884_267	2	2	2	2	0	0	0	2	2	2	2	0	2	0	2	0	2	0	2	0	0	0	2	0	0	0	2	2	2	0	0	2	0	2	2	2	2	0	2	2	2	0	2	0	0	0	0	0	0
RAC875_rep_c69619_145	2	2	2	2	0	0	0	2	2	2	2	0	2	0	2	0	2	0	2	0	0	0	2	0	0	0	2	2	2	2	0	2	0	2	2	2	2	0	2	2	2	0	2	0	0	0	0	0	0
wsnp_Ex_rep_c102390_87572532	2	2	2	2	0	0	0	2	2	2	2	0	2	-1	2	0	2	0	2	0	0	0	2	0	0	0	2	2	2	2	0	2	0	2	2	2	2	0	2	2	2	0	-1	0	0	0	0	0	0
wsnp_Ex_c41007_47932833	2	2	2	2	0	0	0	2	2	2	2	0	2	-1	2	0	2	0	2	0	0	0	2	0	0	0	2	2	2	2	0	2	0	2	2	2	2	0	2	2	2	0	-1	0	0	0	0	0	0
wsnp_CAP11_c1711_934478	2	2	2	2	0	0	0	2	2	2	2	0	2	-1	2	0	2	0	2	0	0	0	2	0	0	0	2	2	2	2	0	2	0	2	2	2	2	0	2	2	2	0	-1	0	0	0	0	0	0
Excalibur_c26462_452	2	2	2	2	0	0	0	2	2	2	2	0	2	-1	2	0	2	0	2	0	0	0	2	0	0	0	2	2	2	-1	0	2	0	2	2	2	2	0	2	2	2	0	-1	0	0	0	0	0	0
wsnp_Ku_c33884_43306422	2	2	2	2	0	0	0	2	2	2	2	0	2	2	2	0	2	0	2	0	0	0	2	0	0	0	2	2	2	2	0	2	0	2	2	2	2	0	2	2	2	0	2	0	0	0	0	0	0
Kukri_c22047_313	2	2	2	2	0	0	0	2	2	2	2	0	2	-1	2	0	2	0	2	0	0	0	2	0	0	0	2	2	2	2	0	2	0	2	2	2	2	0	2	2	2	0	-1	0	0	0	0	0	0
BS00023048_51	2	2	2	2	0	0	0	2	2	2	2	0	2	-1	2	0	2	0	2	0	0	0	2	0	0	0	2	2	2	2	0	2	0	2	2	2	2	0	2	2	2	0	-1	0	0	0	0	0	0
GENE-0342_452	2	2	2	2	0	0	0	2	2	0	2	0	2	2	2	0	2	0	2	0	0	0	2	0	0	0	2	2	2	-1	0	2	0	2	2	2	2	0	2	2	2	0	0	0	0	0	0	0	0
Excalibur_rep_c66618_87	2	2	2	2	0	0	0	2	2	0	2	0	2	0	2	0	2	0	2	0	0	0	2	0	0	0	2	2	2	-1	0	2	0	2	2	2	2	0	2	2	2	0	-1	0	0	0	0	0	0
CAP7_c1527_136	2	-1	2	0	0	2	0	0	-1	0	2	0	2	-1	2	0	2	2	0	2	0	0	2	0	2	0	2	2	2	2	2	2	0	2	2	2	2	0	0	0	2	0	-1	-1	2	0	0	0	0
Kukri_c209_999	2	0	2	0	0	2	0	0	2	0	2	0	2	-1	2	0	2	2	0	2	0	0	2	0	2	0	2	2	2	2	2	2	0	2	2	2	2	0	0	0	2	0	2	0	2	0	0	0	0
Excalibur_c7241_284	2	-1	2	0	0	2	0	0	2	0	2	0	2	-1	2	0	2	2	0	2	0	0	2	0	2	0	2	2	2	-1	2	2	0	2	2	2	2	0	0	0	2	0	2	-1	2	0	0	0	0
BobWhite_c47555_106	2	0	2	0	0	2	0	0	-1	0	2	0	2	-1	2	0	2	2	0	2	0	0	2	0	2	0	2	2	2	2	2	2	0	2	2	2	2	0	0	0	2	0	2	-1	2	0	0	0	0
BS00022446_51	2	0	2	0	0	2	0	0	-1	0	2	0	2	0	2	0	2	2	0	2	0	0	2	0	2	0	2	2	2	-1	2	2	0	2	2	2	2	0	0	0	2	0	-1	-1	2	0	0	0	0
Excalibur_c29496_799	2	-1	2	0	0	2	0	0	2	0	2	0	2	0	2	0	2	2	0	2	0	0	2	0	2	0	2	2	2	-1	2	2	0	2	2	2	2	0	0	0	2	0	-1	-1	2	0	0	0	0
Excalibur_c37727_66	2	0	2	0	0	2	0	0	-1	0	2	0	2	-1	2	0	2	2	0	2	0	0	2	0	2	0	2	2	2	-1	2	2	0	2	2	2	2	0	0	0	2	0	-1	0	2	0	0	0	0
Kukri_c209_477	2	0	2	0	0	2	0	0	-1	0	2	0	2	-1	2	0	2	2	0	2	0	0	2	0	2	0	2	2	2	0	2	2	0	2	2	2	2	0	0	0	2	0	-1	0	2	0	0	0	0
BS00053835_51	2	0	2	0	0	2	0	0	2	0	2	0	2	-1	2	0	2	2	0	2	0	0	2	0	2	0	2	2	2	0	2	2	0	2	2	2	2	0	0	0	2	0	2	-1	2	0	0	0	0
BS00053834_51	2	0	2	0	0	2	0	0	2	0	2	0	2	-1	2	0	2	2	0	2	0	0	2	0	2	0	2	2	2	0	2	2	0	2	2	2	2	0	0	0	2	0	2	-1	2	0	0	0	0
IACX987	2	0	2	0	0	2	0	0	-1	0	2	0	2	-1	2	0	2	2	0	2	0	0	2	0	2	0	2	2	2	0	2	2	0	2	2	2	2	0	0	0	2	0	-1	0	2	0	0	0	0
IAAV2576	2	0	2	0	0	2	0	0	2	0	2	0	2	2	2	0	2	2	0	2	0	0	2	0	2	0	2	2	2	0	2	2	0	2	2	2	2	0	0	0	2	0	2	0	2	0	0	0	0
BobWhite_c5178_188	2	0	2	0	0	2	0	0	2	0	2	0	2	-1	2	0	2	2	0	2	0	0	2	0	2	0	2	2	2	-1	2	2	0	2	2	2	2	0	0	0	2	0	2	-1	2	0	0	2	0
BobWhite_c15773_166	2	0	2	0	0	2	0	0	2	0	2	0	2	-1	2	0	2	2	0	2	0	0	2	0	2	0	2	2	2	2	2	2	0	2	2	2	2	0	0	0	2	0	2	0	2	0	0	2	0
BS00066409_51	2	0	2	0	0	2	0	0	2	0	2	0	2	0	2	0	2	2	0	2	0	0	2	0	2	0	2	2	2	2	2	2	0	2	2	2	2	0	0	0	2	0	2	0	2	0	0	2	0
BobWhite_rep_c50285_616	2	0	2	0	0	2	0	0	2	0	2	0	2	2	2	0	2	2	0	2	0	0	2	0	2	0	2	2	2	2	2	2	0	2	2	2	2	0	0	0	2	0	2	0	2	0	0	2	0
Tdurum_contig67827_98	2	0	2	0	0	2	0	0	2	0	2	0	2	-1	2	0	2	2	0	2	0	0	2	0	2	0	2	2	2	2	2	2	0	2	2	2	2	0	0	0	2	0	-1	0	2	0	0	2	0
CAP7_c4056_108	2	-1	2	0	0	-1	0	0	2	0	2	0	2	-1	2	0	2	2	0	2	0	0	2	0	2	0	2	2	2	2	2	2	0	2	2	2	2	0	0	0	2	0	2	-1	2	0	0	2	0
BS00025880_51	2	-1	2	0	0	2	0	0	-1	0	2	0	2	-1	2	0	2	2	0	2	0	0	2	0	2	0	2	2	2	-1	2	2	0	2	2	2	2	0	0	0	2	0	-1	-1	2	0	0	2	0
BobWhite_c4517_120	2	-1	2	0	0	2	0	0	2	0	2	0	2	2	2	0	2	2	0	2	0	0	2	0	2	0	2	2	2	-1	2	2	0	2	2	2	2	0	0	0	2	0	2	-1	2	0	0	2	0
BS00102709_51	2	0	2	0	0	2	0	0	2	0	2	0	2	-1	0	0	2	2	0	2	0	0	2	0	2	0	2	2	2	0	2	2	0	2	2	2	2	0	0	0	2	0	-1	0	2	0	0	2	0
BS00063368_51	2	0	2	0	0	2	0	0	2	0	2	0	2	-1	0	0	2	2	0	2	0	0	2	0	2	0	2	2	2	-1	2	2	0	2	2	2	2	0	0	0	2	0	-1	-1	2	0	0	2	0
Kukri_c27894_369	2	0	2	0	0	2	0	0	2	0	2	0	2	0	0	0	2	2	0	2	0	0	2	0	2	0	2	2	2	0	2	2	0	2	2	2	2	0	0	0	2	0	2	0	-1	0	0	2	0
Tdurum_contig94203_610	2	0	2	0	0	2	0	0	-1	0	2	0	2	0	0	0	2	2	2	2	0	0	2	0	2	0	2	2	2	0	2	2	0	2	2	2	2	0	0	0	2	0	-1	0	2	0	0	2	0
Tdurum_contig61938_424	-1	2	2	0	0	2	0	2	2	0	2	0	2	0	0	0	2	2	2	2	0	0	2	0	2	0	2	0	2	2	2	2	0	2	2	0	2	0	0	0	0	0	2	-1	2	0	0	2	0
IAAV880	-1	2	2	0	0	2	0	2	2	0	2	0	2	-1	0	0	2	2	2	2	0	0	2	0	2	0	2	0	2	2	2	2	0	2	2	0	2	0	0	0	0	0	2	-1	2	0	0	2	0
CAP12_c575_105	-1	2	2	0	0	2	0	2	2	0	2	0	2	-1	0	0	2	2	2	2	0	0	2	0	2	0	2	0	2	0	2	2	0	2	2	0	2	0	0	0	0	0	-1	-1	2	0	0	2	0
BS00096927_51	0	2	2	0	0	2	0	2	2	0	2	0	2	0	0	0	2	2	2	2	0	0	2	0	2	0	2	0	2	0	2	2	0	2	2	0	2	0	0	0	0	0	2	0	2	0	0	2	0
wsnp_Ra_c6586_11477949	-1	2	2	0	0	2	0	2	2	0	2	0	2	-1	0	0	2	2	2	2	0	0	2	0	2	0	2	0	2	0	2	2	0	2	2	0	2	0	0	0	0	0	-1	-1	2	0	0	2	0
BS00065245_51	2	2	2	0	0	2	0	2	2	0	2	0	2	-1	0	0	2	2	0	0	0	0	2	0	2	0	2	0	0	2	2	2	0	2	2	0	2	0	0	0	0	0	0	0	2	0	0	2	0
Kukri_c24081_1386	2	2	2	0	-1	2	0	2	2	0	-1	-1	2	0	0	0	2	2	0	0	0	0	2	0	2	0	2	0	0	2	2	2	0	2	2	0	2	0	0	0	0	0	0	0	2	0	2	2	0
RAC875_rep_c83950_222	2	2	2	0	0	2	0	2	2	0	2	0	2	0	0	0	2	2	0	0	0	0	2	0	2	0	2	0	0	0	2	2	0	2	2	0	2	0	0	0	0	0	2	0	2	0	2	2	0
IAAV8933	2	2	2	0	0	2	0	2	2	0	2	0	2	-1	0	0	2	2	0	0	0	0	2	0	2	0	2	0	0	2	2	2	0	2	2	0	2	0	0	0	0	0	-1	0	2	0	2	2	0
Excalibur_c20448_318	2	2	2	0	0	2	0	2	2	0	2	0	2	0	0	0	2	2	0	0	0	0	2	0	2	0	2	0	0	-1	2	2	0	2	2	0	2	0	0	0	0	0	2	0	2	0	2	2	0
wsnp_Ku_c16547_25454123	2	2	2	0	0	2	0	2	2	0	2	0	2	-1	0	0	2	2	0	0	0	0	2	0	2	0	2	0	0	2	2	2	0	2	2	0	2	0	0	0	0	0	-1	-1	2	0	2	2	0
Tdurum_contig52350_902	2	2	2	0	0	2	0	2	2	0	2	0	2	-1	0	0	2	2	0	0	0	0	2	0	2	0	2	0	0	2	2	2	0	2	2	0	2	0	0	0	0	0	-1	-1	2	0	2	2	0
Tdurum_contig16904_167	2	2	2	0	0	2	0	2	2	0	2	0	2	-1	0	0	2	2	0	0	0	0	2	0	2	0	2	0	0	2	2	2	0	2	2	0	2	0	0	0	0	0	-1	-1	2	0	2	2	0
Kukri_c25632_86	2	2	2	0	0	2	0	2	2	0	2	0	2	2	0	0	2	2	0	0	0	0	2	0	2	0	2	0	0	2	2	2	0	2	2	0	2	0	0	0	0	0	2	0	2	0	2	2	0
IAAV5232	2	2	2	0	0	2	0	2	2	0	2	0	2	-1	0	0	2	2	0	0	0	0	2	0	2	0	2	0	0	2	2	2	0	2	2	0	2	0	0	0	0	0	2	-1	2	0	2	2	0
BS00097473_51	2	2	2	0	0	2	0	2	2	0	2	0	2	-1	0	0	2	2	0	0	0	0	2	0	2	0	2	0	0	2	2	2	0	2	2	0	2	0	0	0	0	0	-1	-1	2	0	2	2	0
Tdurum_contig42282_11463	2	2	2	0	0	2	0	2	2	0	2	0	2	-1	0	0	2	2	0	0	0	0	2	0	2	0	2	0	0	2	2	2	0	2	2	0	2	0	0	0	0	0	2	-1	2	0	2	2	0
Tdurum_contig42282_10323	2	2	2	0	0	2	0	2	2	0	2	0	2	-1	0	0	2	2	0	0	0	0	2	0	2	0	2	0	0	2	2	2	0	2	2	0	2	0	0	0	0	0	-1	-1	2	0	2	2	0
RAC875_c22328_490	2	2	2	0	0	2	0	2	2	0	-1	0	2	-1	0	0	2	2	0	0	0	0	2	0	2	0	2	0	0	2	2	2	0	2	2	0	2	0	0	0	0	0	2	-1	2	0	2	2	0
RAC875_c22328_1356	2	2	2	0	0	2	0	2	2	0	2	0	2	0	0	0	2	2	0	0	0	0	2	0	2	0	2	0	0	2	2	2	0	2	2	0	2	0	0	0	0	0	-1	0	2	0	2	2	0
Kukri_c44231_1576	2	2	2	0	0	2	0	2	2	0	2	0	2	-1	0	0	2	2	0	0	0	0	2	0	2	0	2	0	0	2	2	2	0	2	2	0	2	0	0	0	0	0	2	0	2	0	2	2	0
Excalibur_c7971_712	2	2	2	0	0	2	0	2	2	0	2	0	2	-1	0	0	2	2	0	0	0	0	2	0	2	0	2	0	0	2	2	2	0	2	2	0	2	0	0	0	0	0	2	-1	2	0	2	2	0
BS00010477_51	2	2	2	0	0	2	0	2	2	0	2	0	2	-1	0	0	2	2	0	0	0	0	2	0	2	0	2	0	0	2	2	2	0	2	2	0	2	0	0	0	0	0	-1	-1	2	0	2	2	0
wsnp_Ex_c10555_17236072	2	2	2	0	0	2	0	2	2	0	2	0	2	-1	0	0	2	2	0	0	0	0	2	0	2	0	2	0	0	0	2	2	0	2	2	0	2	0	0	0	0	0	2	0	2	0	2	2	0
Tdurum_contig12556_183	2	2	2	0	0	2	0	2	2	0	2	0	2	-1	0	0	2	2	0	0	0	0	2	0	2	0	2	0	0	0	2	2	0	2	2	0	2	0	0	0	0	0	-1	-1	2	0	2	2	0
Excalibur_c91176_326	2	2	2	0	0	2	0	2	2	0	2	0	2	-1	0	0	2	2	0	0	0	0	2	0	2	0	2	0	0	0	2	2	0	2	2	0	2	0	0	0	0	0	2	0	2	0	2	2	0
RAC875_c27530_860	2	2	2	0	0	2	0	2	2	0	2	0	2	0	0	0	2	2	0	0	0	0	2	0	2	0	2	0	0	0	2	2	0	2	2	0	2	0	0	0	0	0	2	0	2	0	2	2	0
Excalibur_rep_c106377_80	2	2	2	0	0	2	0	2	2	0	2	0	2	0	0	0	2	2	0	0	0	0	2	0	2	0	2	0	0	0	2	0	0	2	2	0	2	0	0	0	0	0	0	0	2	0	2	2	0
Excalibur_c49875_479	2	2	2	0	0	2	0	2	2	0	2	0	2	0	0	0	2	2	0	0	0	0	2	0	2	0	2	0	0	0	2	0	0	2	2	0	2	0	0	0	0	0	2	0	2	0	2	2	0
GENE-1294_120	2	2	2	0	0	2	0	2	2	0	2	0	2	0	0	0	2	2	0	0	0	0	2	0	2	0	2	0	0	0	2	0	0	2	2	0	2	0	0	0	0	0	2	-1	2	0	2	2	0
RAC875_c51459_311	2	2	2	0	0	2	0	2	2	0	2	0	2	0	0	0	2	2	0	0	0	0	2	0	2	0	2	0	0	2	2	0	0	2	2	0	2	0	0	0	0	0	-1	0	2	0	2	2	0
RAC875_c35688_178	2	2	2	0	0	2	0	2	2	0	2	0	2	2	0	0	2	2	0	0	0	0	2	0	2	0	2	0	0	2	2	0	0	2	2	0	2	0	0	0	0	0	2	2	2	0	2	2	0
Kukri_c706_702	2	2	2	0	0	2	0	2	2	0	2	0	2	-1	0	0	2	2	0	0	0	0	2	0	2	0	2	0	0	2	2	0	0	2	2	0	2	0	0	0	0	0	-1	-1	2	0	2	2	0
Kukri_c26697_366	2	2	2	0	0	2	0	2	2	0	2	0	2	-1	0	0	2	2	0	0	0	0	2	0	2	0	2	0	0	2	2	0	0	2	2	0	2	0	0	0	0	0	-1	-1	2	0	2	2	0
Excalibur_c16329_493	2	2	2	0	0	2	0	2	2	0	2	0	2	0	0	0	2	2	0	0	0	0	2	0	2	0	2	0	0	2	2	0	0	2	2	0	2	0	0	0	0	0	2	0	2	0	2	2	0
BS00027799_51	2	2	2	0	0	2	0	2	2	0	2	0	2	-1	0	0	2	2	0	0	0	0	2	0	2	0	2	0	0	2	2	0	0	2	2	0	2	0	0	0	0	0	-1	-1	2	0	2	2	0
BS00024643_51	2	2	2	0	0	2	0	2	2	0	2	0	2	-1	0	0	2	2	0	0	0	0	2	0	2	0	2	0	0	2	2	0	0	2	2	0	2	0	0	0	0	0	2	-1	2	0	2	2	0
CAP8_c3129_381	2	2	2	0	0	2	0	2	2	0	2	0	2	-1	0	0	2	2	0	0	0	0	2	0	2	0	2	0	0	2	2	0	0	2	2	0	2	0	0	0	0	0	2	-1	2	0	2	2	0
Tdurum_contig92425_3144	2	2	2	0	0	2	0	2	2	0	2	0	2	-1	0	0	2	2	0	0	0	0	2	0	2	0	2	0	0	2	2	0	0	2	2	0	2	0	0	0	0	0	2	0	2	0	2	2	0
Tdurum_contig92425_296	2	2	2	0	0	2	0	2	2	0	2	0	2	0	0	0	2	2	0	0	0	0	2	0	2	0	2	0	0	2	2	0	0	2	2	0	2	0	0	0	0	0	2	0	2	0	2	2	0
BS00065001_51	2	2	2	0	0	2	0	2	2	0	2	0	2	-1	0	0	2	2	0	0	0	0	2	0	2	0	2	0	0	2	2	0	0	2	2	0	2	0	0	0	0	0	2	-1	2	0	2	2	0
wsnp_Ku_c2838_5354231	2	2	2	0	0	2	0	2	2	0	2	0	2	-1	0	0	2	2	0	0	0	0	2	0	2	0	2	0	0	2	2	0	0	2	2	0	2	0	0	0	0	0	-1	-1	2	0	2	2	0
wsnp_BE498892A_Ta_2_25	2	2	2	0	0	2	0	2	2	0	2	0	2	-1	0	0	2	2	0	0	0	0	2	0	2	0	2	0	0	2	2	0	0	2	2	0	2	0	0	0	0	0	2	-1	2	0	2	2	0
tplb0025l18_1788	2	2	2	0	0	2	0	2	2	0	2	0	2	-1	0	0	2	2	0	0	0	0	2	0	2	0	2	0	0	2	2	0	0	2	2	0	2	0	0	0	0	0	2	0	2	0	2	2	0
Tdurum_contig8350_350	2	2	2	0	0	2	0	2	2	0	2	0	2	0	0	0	2	2	0	0	0	0	2	0	2	0	2	0	0	2	2	0	0	2	2	0	2	0	0	0	0	0	-1	-1	2	0	2	2	0
Tdurum_contig50720_482	2	2	2	0	0	2	0	2	2	0	2	0	2	-1	0	0	2	2	0	0	0	0	2	0	2	0	2	0	0	2	2	0	0	2	2	0	2	0	0	0	0	0	-1	-1	2	0	2	2	0
RAC875_c35688_382	2	2	2	0	0	2	0	2	2	0	2	0	2	0	0	0	2	2	0	0	0	0	2	0	2	0	2	0	0	2	2	0	0	2	2	0	2	0	0	0	0	0	2	0	2	0	2	2	0
Kukri_c21008_657	2	2	2	0	0	2	0	2	2	0	2	0	2	0	0	0	2	2	0	0	0	0	2	0	2	0	2	0	0	2	2	0	0	2	2	0	2	0	0	0	0	0	2	-1	2	0	2	2	0
IAAV4880	2	2	2	0	0	2	0	2	2	0	2	0	2	-1	0	0	2	2	0	0	0	0	2	0	2	0	2	0	0	2	2	0	0	2	2	0	2	0	0	0	0	0	2	-1	2	0	2	2	0
Excalibur_rep_c69149_1588	2	2	2	0	0	2	0	2	2	0	2	0	2	-1	0	0	2	2	0	0	0	0	2	0	2	0	2	0	0	2	2	0	0	2	2	0	2	0	0	0	0	0	2	-1	2	0	2	2	0
Excalibur_c62106_387	2	2	2	0	0	2	0	2	2	0	2	0	2	-1	0	0	2	2	0	0	0	0	2	0	2	0	2	0	0	2	2	0	0	2	2	0	2	0	0	0	0	0	-1	0	2	0	2	2	0
BS00087932_51	2	2	2	0	0	2	0	2	2	0	2	0	2	-1	0	0	2	2	0	0	0	0	2	0	2	0	2	0	0	2	2	0	0	2	2	0	2	0	0	0	0	0	2	-1	2	0	2	2	0
BS00087929_51	2	2	2	0	0	2	0	2	2	0	2	0	2	-1	0	0	2	2	0	0	0	0	2	0	2	0	2	0	0	2	2	0	0	2	2	0	-1	0	0	0	0	0	-1	-1	2	0	2	2	0
Tdurum_contig8350_243	2	2	2	0	0	2	0	2	2	0	2	0	2	-1	0	0	2	2	0	0	0	0	2	0	2	0	2	0	0	2	2	0	0	2	2	0	2	0	0	0	0	0	-1	0	2	0	2	2	0
Tdurum_contig14482_1073	2	2	2	0	0	2	0	2	2	0	2	0	2	2	0	0	2	2	0	0	0	0	2	0	2	0	2	0	0	2	2	0	0	2	2	0	2	0	0	0	0	0	2	-1	2	0	2	2	0
RFL_Contig5122_974	2	2	2	0	0	2	0	2	2	0	2	0	2	-1	0	0	2	2	0	0	0	0	2	0	2	0	2	0	0	2	2	0	0	2	2	0	2	0	0	0	0	0	-1	-1	2	0	2	2	0
RAC875_rep_c108389_937	2	2	2	0	0	2	0	2	2	0	2	0	2	-1	0	0	2	2	0	0	0	0	2	0	2	0	2	0	0	2	2	0	0	2	2	0	2	0	0	0	0	0	2	-1	2	0	2	2	0
RAC875_c35200_302	2	2	2	0	0	2	0	2	2	0	2	0	2	-1	0	0	2	2	0	0	0	0	2	0	2	0	2	0	0	2	2	0	0	2	2	0	2	0	0	0	0	0	2	0	2	0	2	2	0
RAC875_c35200_230	2	2	2	0	0	2	0	2	2	0	2	0	2	2	0	0	2	2	0	0	0	0	2	0	2	0	2	0	0	2	2	0	0	2	2	0	2	0	0	0	0	0	2	0	2	0	2	2	0
IAAV7086	2	2	2	0	0	2	0	2	2	0	2	0	2	-1	0	0	2	2	0	0	0	0	2	0	2	0	2	0	0	2	2	0	0	2	2	0	2	0	0	0	0	0	2	-1	2	0	2	2	0
BS00064813_51	2	2	2	0	0	2	0	2	2	0	2	0	2	0	0	0	2	2	0	0	0	0	2	0	2	0	2	0	0	2	2	0	0	2	2	0	2	0	0	0	0	0	2	0	2	0	2	2	0
BS00049816_51	2	2	2	0	0	2	0	2	2	0	2	0	2	-1	0	0	2	2	0	0	0	0	2	0	2	0	2	0	0	2	2	0	0	2	2	0	2	0	0	0	0	0	-1	-1	2	0	2	2	0
BobWhite_c7751_424	2	2	2	0	0	2	0	2	2	0	2	0	2	-1	0	0	2	2	0	0	0	0	2	0	2	0	2	0	0	2	2	0	0	2	2	0	2	0	0	0	0	0	2	0	2	0	2	2	0
tplb0021g21_595	2	2	2	0	0	2	0	2	2	0	2	0	2	0	0	0	2	2	0	0	0	0	2	0	2	0	2	0	0	2	2	0	0	2	2	0	2	0	0	0	0	0	2	0	2	0	2	2	0
wsnp_BE499251A_Ta_2_1	0	2	2	0	0	2	0	2	2	0	2	0	2	-1	0	0	2	2	0	0	0	0	2	0	2	0	2	0	0	2	2	0	0	2	2	0	2	0	0	0	0	0	-1	-1	2	0	2	2	0
Kukri_c53501_305	0	2	2	0	0	2	0	2	2	0	2	0	2	0	0	0	2	2	0	0	0	0	2	0	2	0	2	0	0	0	2	0	0	2	2	0	2	0	0	0	0	0	-1	-1	2	0	2	2	0
IAAV881	0	2	2	0	0	2	0	2	2	0	2	0	2	0	0	0	2	2	0	0	0	0	2	0	2	0	2	0	0	0	2	0	0	2	2	0	2	0	0	0	0	0	2	0	2	0	2	2	0
Tdurum_contig28437_135	0	2	2	0	0	2	0	2	2	0	2	0	2	0	0	0	2	2	0	0	0	0	2	0	2	0	2	0	0	0	2	0	0	2	2	0	2	0	0	0	0	0	2	0	2	0	2	2	0
BobWhite_c923_208	0	2	2	0	0	2	0	2	-1	0	2	0	2	0	0	0	2	2	0	0	0	0	2	0	2	0	2	0	0	0	2	0	0	2	2	0	2	0	0	0	0	0	2	0	2	0	2	2	0
BS00031097_51	0	2	2	0	0	2	0	2	-1	0	2	0	2	0	0	0	2	2	0	0	0	0	2	0	2	0	2	0	0	0	2	0	0	2	2	0	2	0	0	0	0	0	-1	-1	2	0	2	2	0
Kukri_c16094_289	0	2	2	0	0	2	0	2	2	0	2	0	2	0	0	0	2	2	0	0	0	0	2	0	2	0	2	0	0	0	2	0	0	2	2	0	2	0	0	0	0	0	2	2	2	0	2	2	2
Tdurum_contig64286_182	0	2	2	0	0	2	0	2	-1	0	2	0	2	-1	0	0	2	2	0	0	0	0	2	0	2	0	2	0	0	0	2	0	0	2	2	0	2	0	0	0	0	0	-1	0	2	0	2	2	2
Kukri_c16094_799	0	2	2	0	0	2	0	2	2	0	2	0	2	0	0	0	2	2	0	0	0	0	2	0	2	0	2	0	0	0	2	0	0	2	2	0	2	0	0	0	0	0	-1	-1	2	0	2	2	2
BS00007689_51	0	2	2	0	0	2	0	2	2	0	2	0	2	0	0	0	2	2	0	0	0	0	2	0	2	0	2	0	0	0	2	0	0	2	2	0	2	0	0	0	0	0	2	-1	2	0	2	2	2
BS00021937_51	0	2	2	0	0	2	0	2	2	0	2	0	2	0	0	0	2	2	0	0	0	0	2	0	2	0	2	0	0	0	2	0	0	2	2	0	2	0	0	0	0	0	2	0	2	0	2	2	2
Kukri_c7605_181	0	2	2	0	0	2	0	2	-1	0	2	0	2	0	0	0	2	2	0	0	0	0	2	0	2	0	2	0	0	2	2	0	0	2	2	0	2	0	0	0	0	0	-1	-1	2	0	2	2	2
BS00010664_51	0	2	2	0	0	2	0	2	-1	0	2	0	2	0	0	0	2	2	0	0	0	0	2	0	2	0	2	0	0	2	2	0	0	2	2	0	2	0	0	0	0	0	-1	0	2	0	2	2	2
Tdurum_contig50839_593	0	2	2	0	0	2	0	2	2	0	2	0	2	0	0	0	2	2	0	0	0	0	2	0	2	0	2	0	0	2	2	0	0	2	2	0	2	0	0	0	0	0	-1	-1	2	0	2	2	2
RAC875_c46265_501	0	2	2	0	0	2	0	2	2	0	2	0	2	0	0	0	2	2	0	0	0	0	2	0	2	0	2	0	0	0	2	0	0	2	2	0	2	0	0	0	0	0	0	0	2	0	2	2	2
BS00067284_51	0	2	0	0	0	2	0	2	2	0	2	0	2	-1	0	2	2	0	0	0	0	0	2	0	2	0	2	2	0	-1	0	0	0	2	2	0	0	0	0	0	2	2	0	-1	2	0	2	2	2
Ku_c7283_915	0	2	0	0	0	2	0	2	-1	0	2	0	2	-1	0	2	2	0	0	0	0	0	2	0	2	0	2	2	2	2	0	0	0	2	2	0	0	0	0	0	2	2	-1	-1	2	0	2	2	2
Ra_c19051_1446	0	2	0	0	0	2	0	2	2	0	2	0	2	0	0	2	2	0	0	0	0	0	2	0	2	0	2	2	2	2	0	0	0	2	2	-1	0	0	0	0	2	2	0	0	2	0	2	2	2
Excalibur_c28885_363	0	2	0	0	0	2	0	2	2	0	2	0	2	0	0	2	2	0	0	0	0	0	2	0	2	0	2	2	2	2	0	0	0	2	2	-1	0	0	0	0	2	2	-1	-1	2	0	2	2	2
wsnp_Ex_c63909_62932669	0	2	0	0	0	2	0	2	2	0	2	0	2	0	0	2	2	0	0	0	0	0	2	0	2	0	2	2	2	0	0	0	0	2	2	0	0	0	0	0	2	2	0	0	2	0	2	2	2
BS00101944_51	0	2	0	0	0	2	0	2	2	0	2	0	2	0	0	2	2	0	0	0	0	0	2	0	2	0	2	2	2	0	0	0	0	2	2	-1	0	0	0	0	2	2	-1	-1	2	0	2	2	2
BS00024506_51	0	2	0	0	-1	2	0	2	2	0	2	-1	2	0	0	2	2	-1	-1	-1	-1	0	2	0	2	0	2	2	2	0	0	0	0	2	2	0	-1	0	0	0	2	2	-1	-1	2	0	2	2	2
Excalibur_rep_c71146_319	0	2	0	0	0	2	0	2	2	0	2	0	2	0	0	2	2	0	0	0	0	0	2	0	2	0	2	2	2	0	0	0	0	2	2	-1	0	0	0	0	2	2	0	0	2	0	2	2	2
wsnp_Ex_c63909_62932893	0	2	0	0	0	2	0	2	2	0	2	0	2	0	0	2	2	0	0	0	0	0	2	0	2	0	2	2	2	0	0	0	0	2	2	0	0	0	0	0	2	2	0	0	2	0	2	2	2
Kukri_c81100_105	0	2	0	0	0	2	0	2	2	0	2	0	2	0	0	2	2	0	0	0	0	0	2	0	2	0	2	2	2	0	0	0	0	2	2	-1	0	0	0	0	2	2	0	0	2	0	2	2	2
Ex_c6937_1992	0	2	0	0	0	2	0	2	2	0	-1	0	2	0	0	2	2	0	0	0	0	0	2	0	2	0	2	2	2	0	0	0	0	2	2	-1	0	0	0	0	2	2	-1	-1	2	0	2	2	2
wsnp_Ex_c63909_62932437	0	2	0	0	0	2	0	2	2	0	2	0	2	0	0	2	2	0	0	0	0	0	2	0	2	0	2	2	2	0	0	0	0	2	2	0	0	0	0	0	2	2	-1	-1	2	0	2	2	2
Kukri_c12849_1392	0	2	0	0	0	2	0	2	2	0	2	0	2	0	0	2	2	0	0	0	0	0	2	0	2	0	2	2	2	0	0	0	0	2	2	0	0	0	0	0	2	2	-1	-1	2	0	2	2	2
Excalibur_c1999_1130	0	2	0	0	0	2	0	2	2	0	2	0	2	0	0	2	2	0	0	0	0	0	2	0	2	0	2	2	2	0	0	0	0	2	2	0	0	0	0	0	2	2	0	0	2	0	2	2	2
RAC875_c24364_526	0	2	0	0	0	2	0	2	-1	0	2	2	2	-1	0	2	2	0	0	0	0	0	2	0	2	0	2	2	2	0	0	0	0	2	2	0	0	0	0	0	2	2	0	0	2	0	2	2	2
wsnp_Ra_c15518_23944753	0	2	0	0	0	2	0	2	2	0	2	2	2	-1	0	2	2	0	0	0	0	0	2	0	2	0	2	2	2	0	0	0	0	2	2	-1	0	0	0	0	2	2	-1	-1	2	0	2	2	2
wsnp_JD_c30_50478	0	2	0	0	0	2	0	2	2	0	2	2	2	0	0	2	2	0	0	0	0	0	2	0	2	0	2	2	2	0	0	0	0	2	2	-1	0	0	0	0	2	2	0	0	2	0	2	2	2
RAC875_c24364_307	0	2	0	0	0	2	0	2	2	0	2	2	2	0	0	2	2	0	0	0	0	0	2	0	2	0	2	2	2	0	0	0	0	2	2	0	0	0	0	0	2	2	0	0	2	0	2	2	2
GENE-4937_1435	0	2	0	0	0	2	0	2	2	0	2	2	2	-1	0	2	2	0	0	0	0	0	2	0	2	0	2	2	2	0	0	0	0	2	2	-1	0	0	0	0	2	2	0	-1	2	0	2	2	2
Excalibur_c29231_932	0	0	0	2	2	-1	0	0	-1	2	2	2	2	2	-1	2	0	2	2	0	0	-1	0	2	2	0	0	2	0	-1	2	2	2	0	0	0	2	0	2	2	2	2	2	0	0	0	-1	2	0
wsnp_Ex_c342_670415	0	0	0	2	2	-1	0	0	-1	2	2	2	2	2	-1	2	0	2	2	0	0	-1	0	2	2	0	0	2	0	2	2	2	2	0	0	0	2	0	2	2	2	2	2	0	0	0	-1	2	0
wsnp_Ex_c342_670243	0	0	0	2	2	-1	0	0	-1	2	2	2	2	2	-1	2	0	2	2	0	0	-1	0	2	2	0	0	2	0	2	2	2	2	0	0	0	2	0	2	2	2	2	2	0	0	0	-1	2	0
tplb0032i02_1388	0	0	0	2	2	0	0	0	2	2	2	2	2	2	-1	2	0	2	2	0	0	2	0	2	2	0	0	2	0	2	2	2	2	0	0	0	2	0	2	2	2	2	2	0	0	0	2	2	0
RAC875_c63018_348	0	0	0	2	2	0	0	0	2	2	2	2	2	2	-1	2	0	2	2	0	0	-1	0	2	2	0	0	2	0	2	2	2	2	0	0	0	2	0	2	2	2	2	2	0	0	0	-1	2	0
wsnp_Ex_c322_624793	0	0	0	2	2	-1	0	0	2	2	2	2	2	2	-1	2	0	2	2	0	0	-1	0	2	2	0	0	2	0	2	2	2	2	0	0	0	2	0	2	2	2	2	2	0	0	0	-1	2	0
RAC875_c63018_441	0	0	0	2	2	0	0	0	2	2	2	2	2	2	-1	2	0	2	2	0	0	-1	0	2	2	0	0	2	0	2	2	2	2	0	0	0	2	0	2	2	2	2	2	0	0	0	-1	2	0
BS00022393_51	0	0	0	2	2	-1	0	0	2	2	2	2	2	2	-1	2	0	2	2	0	0	-1	0	2	2	0	0	2	0	2	2	2	2	0	0	0	2	0	2	2	2	2	2	0	0	0	-1	2	0
RAC875_c8069_1709	0	0	0	2	2	2	0	0	2	2	2	2	2	2	2	2	0	2	2	0	0	2	0	2	2	0	0	2	0	2	2	2	2	0	0	0	2	0	2	2	2	2	2	0	0	0	2	2	0
wsnp_Ku_c23598_33524490	0	-1	0	2	2	2	0	0	2	2	2	2	2	2	2	2	0	2	2	0	0	2	0	2	2	0	0	2	0	-1	2	2	2	0	0	0	2	0	2	2	2	2	2	0	-1	0	2	2	0
wsnp_Ex_c19516_28483751	0	0	0	2	2	2	0	0	2	2	2	2	2	2	2	2	0	2	2	0	0	2	0	2	2	0	0	2	0	2	2	2	2	0	0	0	2	0	2	2	2	2	2	0	0	0	2	2	0
wsnp_Ex_c19516_28481857	0	0	0	2	2	2	0	0	2	2	2	2	2	2	2	2	0	2	2	0	0	2	0	2	2	0	0	2	0	2	2	2	2	0	0	0	2	0	2	2	2	2	2	0	0	0	2	2	0
wsnp_Ex_c11560_18632698	0	0	0	2	2	2	0	0	2	2	2	2	2	2	-1	2	0	2	2	0	0	-1	0	2	2	0	0	2	0	2	2	2	2	0	0	0	2	0	2	2	2	2	2	0	0	0	-1	2	0
RFL_Contig174_406	0	0	0	2	2	2	0	0	2	2	2	2	2	2	2	2	0	2	2	0	0	2	0	2	2	0	0	2	0	-1	2	2	2	0	0	0	2	0	2	2	2	2	2	0	0	0	2	2	0
Excalibur_c15379_1305	0	0	0	2	2	2	0	0	2	2	2	2	2	2	-1	2	0	2	2	0	0	2	0	2	2	0	0	2	0	2	2	2	2	0	0	0	2	0	2	2	2	2	2	0	0	0	-1	2	0
Ex_c19516_3687	0	0	0	2	2	2	0	0	2	2	2	2	2	2	2	2	0	2	2	0	0	2	0	2	2	0	0	2	0	2	2	2	2	0	0	0	2	0	2	2	2	2	2	0	0	0	-1	2	0
Ex_c19516_1184	0	0	0	2	2	2	0	0	2	2	2	2	2	2	2	2	0	2	2	0	0	2	0	2	2	0	0	2	0	2	2	2	2	0	0	0	2	0	2	2	2	2	2	0	0	0	2	2	0
BS00105593_51	0	0	0	2	2	2	0	0	2	2	2	2	2	2	2	2	0	2	2	0	0	2	0	2	2	0	0	2	0	-1	2	2	2	0	0	0	2	0	2	2	2	2	2	0	0	0	2	2	0
BS00023052_51	0	0	0	2	2	2	0	0	2	2	2	2	2	2	-1	2	0	2	2	0	0	-1	0	2	2	0	0	2	0	2	2	2	2	0	0	0	2	0	2	2	2	2	2	0	0	0	-1	2	0
BobWhite_c13373_250	0	0	0	2	2	2	0	0	-1	2	2	2	2	2	2	2	0	2	2	0	0	2	0	2	2	0	0	2	0	-1	2	2	2	0	0	0	2	0	2	2	2	2	2	0	0	0	-1	2	0
wsnp_Ex_c19516_28483050	0	0	0	2	2	2	0	0	2	2	2	2	2	2	-1	2	0	2	2	0	0	2	0	2	2	0	0	2	0	2	2	2	2	0	0	0	2	0	2	2	2	2	2	0	0	0	-1	2	0
wsnp_Ex_c11560_18632777	0	0	0	2	2	2	0	0	2	2	2	2	2	2	-1	2	0	2	2	0	0	2	0	2	2	0	0	2	0	2	2	2	2	0	0	0	2	0	2	2	2	2	2	0	0	0	-1	2	0
Tdurum_contig56157_1595	0	0	0	2	2	2	0	0	2	2	2	2	2	2	-1	2	0	2	2	0	0	-1	0	2	2	0	0	2	0	2	2	2	2	0	0	0	2	0	2	2	2	2	2	0	0	0	-1	2	0
TA012412-0412	0	0	0	2	2	2	0	0	2	2	2	2	2	2	2	2	0	2	2	0	0	2	0	2	2	0	0	2	0	2	2	2	2	0	0	0	2	0	2	2	2	2	2	0	0	0	2	2	0
Excalibur_rep_c66982_126	0	0	0	2	2	2	0	0	2	2	2	2	2	2	-1	2	0	2	2	0	0	-1	0	2	2	0	0	2	0	2	2	2	2	0	0	0	2	0	2	2	2	2	2	0	0	0	-1	2	0
wsnp_Ex_c11950_19164191	0	0	0	2	2	2	0	0	2	2	2	2	2	2	2	2	0	2	2	0	0	2	0	2	2	0	0	2	0	0	2	2	2	0	0	0	2	0	2	2	2	2	2	0	0	0	0	2	0
wsnp_Ex_c11950_19164041	0	0	0	2	2	2	0	0	2	2	2	2	2	2	2	2	0	2	2	0	0	2	0	2	2	0	0	2	0	0	2	2	2	0	0	0	2	0	2	2	2	2	2	0	0	0	2	2	0
RFL_Contig4030_493	0	0	0	2	2	2	0	0	2	2	2	-1	2	2	2	2	0	-1	2	0	0	2	0	2	2	0	0	2	0	0	2	2	2	0	0	0	2	0	2	2	2	2	2	0	0	0	-1	2	0
Kukri_c22152_730	0	0	0	2	2	2	0	0	2	2	2	2	2	2	2	2	0	2	2	0	0	2	0	2	2	0	0	2	0	0	2	2	2	0	0	0	2	0	2	2	2	2	2	0	0	0	2	2	0
CAP8_c2783_336	0	0	0	2	2	2	0	0	2	2	2	2	2	2	-1	2	0	2	2	0	0	-1	0	2	2	0	0	2	0	0	2	2	2	0	0	0	2	0	2	2	2	2	2	0	0	0	-1	2	0
wsnp_Ku_c33374_42877546	0	0	0	2	2	-1	0	0	2	2	2	2	2	2	-1	2	0	2	2	0	0	2	0	2	2	0	0	2	0	0	2	2	2	0	0	0	2	0	2	2	2	2	2	0	0	0	-1	2	0
Kukri_c33374_1048	0	0	0	2	2	0	0	0	2	2	2	2	2	2	2	2	0	2	2	0	0	2	0	2	2	0	0	2	0	0	2	2	2	0	0	0	2	0	2	2	2	2	2	0	0	0	-1	2	0
BS00064392_51	0	0	0	2	2	-1	0	0	2	2	2	2	2	2	-1	2	0	2	2	0	0	2	0	2	2	0	0	2	0	-1	2	2	2	0	0	0	2	0	2	2	2	2	2	0	0	0	-1	2	0
Excalibur_rep_c66783_540	0	0	0	2	2	0	0	0	2	2	2	2	2	2	2	2	0	2	2	0	0	2	0	2	2	0	0	2	0	0	2	2	2	0	0	0	2	0	2	2	2	2	2	0	0	0	2	2	0
TA002095-0637	0	0	0	2	2	0	0	0	2	2	2	2	2	2	-1	2	0	2	2	0	0	2	0	2	2	0	0	2	0	0	2	2	2	0	0	0	2	0	2	2	2	2	2	0	0	0	-1	2	0
RAC875_c16881_1400	0	0	0	2	2	0	0	0	-1	2	2	2	2	2	0	0	0	2	2	0	0	2	0	2	2	0	0	2	0	0	2	2	2	0	0	0	2	0	2	2	2	2	2	0	0	0	0	2	0
Kukri_c12804_620	0	0	0	2	2	0	0	0	0	2	2	2	2	2	0	0	0	2	2	0	0	2	0	2	2	0	0	2	0	0	2	2	2	0	0	0	2	0	2	2	2	2	2	0	0	0	2	2	0
Tdurum_contig48835_437	0	0	0	2	2	-1	0	0	-1	2	2	2	2	2	0	0	0	2	2	0	0	-1	0	2	2	0	0	2	0	2	2	2	2	0	0	0	2	0	2	2	2	2	2	0	0	0	-1	2	0
BobWhite_c10673_330	0	0	0	2	2	-1	0	0	2	2	2	2	2	2	0	0	0	2	2	0	0	2	0	2	2	0	0	2	0	2	2	2	2	0	0	0	2	0	2	2	2	2	2	0	0	0	2	2	0
BobWhite_c10673_138	0	0	0	2	2	0	0	0	2	2	2	2	2	2	0	0	0	2	2	0	0	2	0	2	2	0	0	2	0	2	2	2	2	0	0	0	2	0	2	2	2	2	2	0	0	0	2	2	0
BobWhite_c48552_673	0	0	2	2	2	-1	0	0	2	2	2	2	2	2	0	0	0	2	0	0	0	0	0	2	2	0	0	0	2	2	2	2	2	0	0	0	2	0	2	2	0	2	2	0	0	0	-1	2	0
Ra_c18597_329	0	0	2	2	2	-1	0	2	2	2	2	2	2	2	0	0	0	2	0	0	0	0	0	2	2	0	0	0	2	2	2	2	2	0	0	0	2	0	2	2	0	2	2	0	0	0	-1	2	-1
BS00063251_51	0	0	2	2	2	2	0	2	2	2	2	2	2	2	0	0	0	2	0	0	0	0	0	2	2	0	0	0	2	2	2	2	2	0	0	0	2	0	2	2	0	2	2	0	0	0	2	2	0
wsnp_Ku_c9883_16462146	0	0	2	2	2	-1	0	2	2	2	2	2	2	2	0	0	0	2	0	0	0	0	0	2	2	0	0	0	2	-1	2	2	2	0	0	0	2	0	2	2	0	2	2	0	0	0	2	2	0
Ex_c19038_1581	0	0	2	2	2	2	0	2	2	2	2	2	2	2	0	0	0	2	0	0	0	0	0	2	2	0	0	0	2	-1	2	2	2	0	0	0	2	0	2	2	0	2	2	0	0	0	2	2	0
Tdurum_contig10785_1428	0	0	2	2	2	2	0	2	2	2	2	2	2	2	0	0	0	2	0	0	0	0	0	2	2	0	0	0	2	2	2	2	2	0	0	0	2	0	2	2	0	2	2	0	0	0	2	2	0
Tdurum_contig10785_816	0	0	2	2	2	-1	0	2	2	2	2	2	2	2	0	0	0	2	0	0	0	0	0	2	2	0	0	0	2	2	2	2	2	0	0	0	2	0	2	2	0	2	2	0	0	0	-1	2	0
Tdurum_contig10785_1409	0	0	2	2	2	-1	0	2	2	2	2	2	2	2	0	0	0	2	0	0	0	0	0	2	2	0	0	0	2	2	2	2	2	0	0	0	2	0	2	2	0	2	2	0	0	0	2	2	0
Tdurum_contig10785_103	0	0	2	2	2	-1	0	2	2	2	2	2	2	2	0	0	0	2	0	0	0	0	0	2	2	0	0	0	2	2	2	2	2	0	0	0	2	0	2	2	0	2	2	0	0	0	-1	2	0
Kukri_c9883_407	0	0	2	2	2	-1	0	2	2	2	2	2	2	2	0	0	0	2	0	0	0	0	0	2	2	0	0	0	2	-1	2	2	2	0	0	0	2	0	2	2	0	2	2	0	0	0	2	2	0
BS00022322_51	0	0	2	2	2	2	0	2	2	2	2	2	2	2	0	0	0	2	0	0	0	0	0	2	2	0	0	0	2	2	2	2	2	0	0	0	2	0	2	2	0	2	2	0	0	0	2	2	0
Tdurum_contig10785_2433	0	0	2	2	2	0	0	2	2	2	2	2	2	2	0	0	0	2	0	0	0	0	0	2	2	0	0	0	2	2	2	2	2	0	0	0	2	0	2	2	0	2	2	0	0	0	2	2	0
Tdurum_contig74920_757	0	2	0	2	0	2	0	0	0	0	0	0	0	0	0	0	0	0	0	0	0	0	0	2	2	2	2	2	2	2	2	0	0	0	2	0	0	2	0	2	2	2	0	0	0	2	2	0	2
BobWhite_c11997_246	0	2	0	2	0	2	0	0	0	0	0	0	0	0	0	0	0	0	0	0	0	0	0	2	2	2	2	2	2	2	2	0	0	0	2	0	0	2	0	2	2	2	0	0	0	2	2	0	2
RAC875_c64107_404	0	2	0	2	0	2	0	0	0	0	0	0	0	0	0	0	0	0	0	0	0	0	0	2	2	2	2	2	2	2	2	0	0	0	2	0	0	2	0	2	2	2	0	0	0	2	2	0	2
Tdurum_contig59358_392	0	2	0	2	0	2	0	0	0	0	0	0	0	0	0	0	0	0	0	0	0	0	0	2	2	2	2	2	2	2	2	0	0	0	2	0	0	2	0	2	2	2	0	0	0	2	2	0	2
CAP8_rep_c3652_80	0	2	0	2	0	2	0	0	0	0	0	0	0	0	0	0	0	0	0	0	0	0	0	2	2	2	2	2	2	2	2	0	0	0	2	0	0	2	0	2	2	2	0	0	0	2	2	0	2
CAP8_rep_c6382_237	0	2	0	2	0	2	0	0	0	0	0	0	0	0	0	0	0	0	0	0	0	0	0	2	2	2	2	2	2	2	2	0	0	0	2	0	0	2	0	2	2	2	0	0	0	2	2	0	2
Excalibur_c6264_1054	0	2	0	2	0	2	0	0	0	0	0	0	0	0	0	0	0	0	0	0	0	0	0	2	2	2	2	2	2	2	2	0	0	0	2	0	0	2	0	2	2	2	0	0	0	2	2	0	2
Kukri_c62467_362	0	-1	0	2	0	2	0	0	0	0	0	0	0	0	0	0	0	0	0	0	0	0	0	2	2	2	2	2	2	2	2	0	0	0	2	0	0	2	0	2	2	2	0	0	0	2	2	0	2
GENE-1674_631	0	2	0	2	0	2	0	0	0	0	0	0	0	0	0	0	0	0	0	0	0	0	0	2	2	2	2	2	2	2	2	0	0	0	2	0	0	2	0	2	2	2	0	0	0	2	2	0	2
Excalibur_c6264_249	0	2	0	2	0	2	0	0	0	0	0	0	0	0	0	0	0	0	0	0	0	0	0	2	2	2	2	2	2	2	2	0	0	0	2	0	0	2	0	2	2	2	0	0	0	2	2	0	2
Kukri_c10511_94	0	2	0	2	0	2	0	0	0	0	0	0	0	0	0	0	0	0	0	0	0	0	0	2	2	2	2	2	2	2	2	0	0	0	2	0	0	2	0	2	2	2	0	0	0	2	2	0	2
Kukri_c14029_117	0	2	0	2	0	2	0	0	0	0	0	0	0	0	0	0	0	0	0	0	0	0	0	2	2	2	2	2	2	2	2	0	0	0	2	0	0	2	0	2	2	2	0	0	0	2	2	0	2
IAAV4190	0	2	0	2	0	2	0	0	0	0	0	0	0	-1	0	0	0	0	0	0	0	0	0	2	2	2	2	2	2	2	2	0	0	0	2	0	0	2	0	2	2	2	0	0	0	2	2	0	2
Kukri_c34845_242	0	2	0	2	0	2	0	0	0	0	0	0	0	0	0	0	0	0	0	0	0	0	0	2	2	2	2	2	2	2	2	0	0	0	2	0	0	2	0	2	2	2	0	0	0	2	2	0	2
Kukri_c3673_2442	0	2	0	2	0	2	0	0	0	0	0	0	0	0	0	0	0	0	0	0	0	0	0	2	2	2	2	2	2	2	2	0	0	0	2	0	0	2	0	2	2	2	0	0	0	2	2	0	2
Kukri_rep_c73936_154	0	2	0	2	0	2	0	0	0	0	0	0	0	0	0	0	0	0	0	0	0	0	0	2	2	2	2	2	2	2	2	0	0	0	2	0	0	2	0	2	2	2	0	0	0	2	2	0	2
RAC875_c45016_79	0	2	0	2	0	2	0	0	0	0	0	0	0	0	0	0	0	0	0	0	0	0	0	2	2	2	2	2	2	2	2	0	0	0	2	0	0	2	0	2	2	2	0	0	0	2	2	0	2
RAC875_c66845_466	0	2	0	2	0	2	0	0	-1	0	0	0	0	0	0	0	0	0	0	0	0	0	0	2	2	2	2	2	2	2	2	0	0	0	2	0	0	2	0	2	2	2	0	0	0	2	2	0	2
GENE-1300_770	0	2	0	2	0	2	0	0	0	0	0	0	0	0	0	0	0	0	0	0	0	0	0	2	2	2	2	2	2	2	2	0	0	0	2	0	0	2	0	2	2	2	0	0	0	2	2	0	2
BobWhite_c9704_273	0	2	0	2	0	2	0	0	0	0	0	0	0	0	0	0	0	0	0	0	0	0	0	2	2	2	2	2	2	2	2	0	0	0	2	0	0	2	0	2	2	2	0	0	0	2	2	0	2
JG_c3077_225	0	2	0	2	0	2	0	0	0	0	0	0	0	0	0	0	0	0	0	0	0	0	0	2	2	2	2	2	2	2	2	0	0	0	2	0	0	2	0	2	2	2	0	0	0	2	2	0	2
Excalibur_c1905_1117	0	2	0	2	0	2	0	0	0	0	0	0	0	0	0	0	0	0	0	0	0	0	0	2	2	2	2	2	2	2	2	0	0	0	2	0	0	2	0	2	2	2	0	0	0	2	2	0	2
Excalibur_c9000_209	0	2	0	2	0	2	0	0	0	0	0	0	0	0	0	0	0	0	0	0	0	0	0	2	2	2	2	2	2	2	2	0	0	0	2	0	0	2	0	2	2	2	0	0	0	2	2	0	2
RAC875_c10286_1247	0	2	0	2	0	2	0	0	0	0	0	0	0	0	0	0	0	0	0	0	0	0	0	2	2	2	2	2	2	2	2	0	0	0	2	0	0	2	0	2	2	2	0	0	0	2	2	0	2
BobWhite_c17852_511	0	-1	0	2	0	2	0	0	0	0	0	0	0	0	0	0	0	0	0	0	0	0	0	2	2	2	2	2	2	2	2	0	0	0	2	0	0	2	0	2	2	2	0	0	0	2	2	0	2
CAP7_c9672_181	0	2	0	2	0	2	0	0	0	0	0	0	0	0	0	0	0	0	0	0	0	0	0	2	2	2	2	2	2	2	2	0	0	0	2	0	0	2	0	2	2	2	0	0	0	2	2	0	2
wsnp_Ex_c21950_31124594	0	2	0	2	0	2	0	0	0	0	0	0	0	0	0	0	0	0	0	0	0	0	0	2	2	2	2	2	2	2	2	0	0	0	2	0	0	2	0	2	2	2	0	0	0	2	2	0	2
IAAV902	0	2	0	2	0	2	0	0	-1	2	0	0	0	-1	2	2	2	0	0	0	0	0	0	2	2	2	2	0	2	2	2	0	0	0	2	0	2	2	0	0	0	0	0	-1	2	2	2	0	2
BobWhite_c18408_199	0	-1	0	2	0	2	0	0	-1	2	0	0	0	-1	2	2	2	0	0	0	0	0	0	2	2	2	2	0	2	2	2	0	0	0	0	0	2	2	0	0	0	0	0	-1	2	2	2	0	2
BobWhite_c43681_334	0	2	0	2	0	2	0	0	-1	2	0	0	0	-1	2	2	2	0	0	0	0	0	0	2	2	2	2	0	2	2	2	0	0	0	0	0	2	2	0	0	0	0	0	-1	2	2	2	0	2
BS00010854_51	0	2	0	2	0	2	0	0	-1	2	0	0	0	2	2	2	2	0	0	0	0	0	0	2	2	2	2	0	2	2	2	0	0	0	0	0	2	2	0	0	0	0	0	-1	2	2	2	0	2
BS00011612_51	0	2	0	2	0	2	0	0	0	2	0	0	0	-1	2	2	2	0	0	0	0	0	0	2	2	2	2	0	2	2	2	0	0	0	0	0	2	2	0	0	0	0	0	0	2	2	2	0	2
BS00037537_51	0	2	0	2	0	2	0	0	-1	2	0	0	0	-1	2	2	2	0	0	0	0	0	0	2	2	2	2	0	2	2	2	0	0	0	0	0	2	2	0	0	0	0	0	0	2	2	2	0	2
BS00076631_51	0	2	0	2	0	2	0	0	-1	2	0	0	0	-1	2	2	-1	0	0	0	0	0	0	2	2	2	2	0	2	2	2	0	0	0	0	0	2	2	0	0	0	0	-1	0	2	2	2	0	2
Ex_c104581_457	0	2	0	2	0	2	0	0	-1	2	0	0	0	-1	2	2	2	0	0	0	0	0	0	2	2	2	2	0	2	2	2	0	0	0	0	0	2	2	0	0	0	0	0	-1	2	2	2	0	2
Ex_c9685_1264	0	2	0	2	0	2	0	0	-1	2	0	0	0	-1	2	2	2	0	0	0	0	0	0	2	2	2	2	0	2	2	2	0	0	0	0	0	2	2	0	0	0	0	0	0	2	2	2	0	2
Excalibur_rep_c67269_496	0	2	0	2	0	2	0	0	-1	2	0	0	0	2	2	2	2	0	0	0	0	0	0	2	2	2	2	0	2	2	2	0	0	0	0	0	2	2	0	0	0	0	0	-1	2	2	2	0	2
IAAV1334	0	-1	0	2	0	2	0	0	-1	2	0	0	0	-1	2	2	2	0	0	0	0	0	0	2	2	2	2	0	2	2	2	0	0	0	0	0	2	2	0	0	0	0	0	-1	2	2	2	0	2
IAAV8924	0	2	0	2	0	2	0	0	-1	2	0	0	0	-1	2	2	2	0	0	0	0	0	0	2	2	2	2	0	2	2	2	0	0	0	0	0	2	2	0	0	0	0	0	-1	2	2	2	0	2
Ra_c20211_1415	0	2	0	2	0	2	0	0	0	2	0	0	0	2	2	2	2	0	0	0	0	0	0	2	2	2	2	0	2	2	2	0	0	0	0	0	2	2	0	0	0	0	0	0	2	2	2	0	2
RFL_Contig1175_354	0	-1	0	2	0	2	0	0	-1	2	0	0	0	-1	2	2	2	0	0	0	0	0	0	2	2	2	2	0	2	2	2	0	0	0	0	0	2	2	0	0	0	0	0	-1	2	2	2	0	2
Tdurum_contig11121_739	0	2	0	2	0	2	0	0	-1	2	0	0	0	-1	2	2	2	0	0	0	0	0	0	2	2	2	2	0	2	2	2	0	0	0	0	0	2	2	0	0	0	0	0	0	2	2	2	0	2
wsnp_Ex_c15100_23284023	0	2	0	2	0	2	0	0	-1	2	0	0	0	-1	2	2	2	0	0	0	0	0	0	2	2	2	2	0	2	2	2	0	0	0	0	0	2	2	0	0	0	0	0	-1	2	2	2	0	2
wsnp_Ex_c41283_48141201	0	2	0	2	0	2	0	0	-1	2	0	0	0	-1	2	2	2	0	0	0	0	0	0	2	2	2	2	0	2	2	2	0	0	0	0	0	2	2	0	0	0	0	0	0	2	2	2	0	2
wsnp_Ex_c47763_52874806	0	2	0	2	0	2	0	0	-1	2	0	0	0	-1	2	2	2	0	0	0	0	0	0	2	2	2	2	0	2	2	2	0	0	0	0	0	2	2	0	0	0	0	0	-1	2	2	2	0	2
wsnp_Ex_c51776_55603135	0	-1	0	2	0	2	0	0	0	2	0	0	0	-1	2	2	2	0	0	0	0	0	0	2	2	2	2	0	2	2	2	0	0	0	0	0	2	2	0	0	0	0	0	0	2	2	2	0	2
wsnp_Ex_c763_1503467	0	2	0	2	0	2	0	0	-1	2	0	0	0	2	2	2	2	0	0	0	0	0	0	2	2	2	2	0	2	2	2	0	0	0	0	0	2	2	0	0	0	0	0	-1	2	2	2	0	2
wsnp_Ex_rep_c69034_67935465	0	2	0	2	0	2	0	0	-1	2	0	0	0	2	2	2	2	0	0	0	0	0	0	2	2	2	2	0	2	2	2	0	0	0	0	0	2	2	0	0	0	0	0	0	2	2	2	0	2
wsnp_Ku_c32404_42016343	0	2	0	2	0	2	0	0	-1	2	0	0	0	-1	2	2	2	0	0	0	0	0	0	2	2	2	2	0	2	2	2	0	0	0	0	0	2	2	0	0	0	0	0	-1	2	2	2	0	2
wsnp_Ra_c27831_37346894	0	2	0	2	0	2	0	0	-1	2	0	0	0	-1	2	2	2	0	0	0	0	0	0	2	2	2	2	0	2	2	2	0	0	0	0	0	2	2	0	0	0	0	0	-1	2	2	2	0	2
wsnp_RFL_Contig1944_1115756	0	-1	0	2	0	2	0	0	0	2	0	0	0	-1	2	2	2	0	0	0	0	0	0	2	2	2	2	0	2	2	2	0	0	0	0	0	2	2	0	0	0	0	0	0	2	2	2	0	2
wsnp_RFL_Contig3396_3515504	0	2	0	2	0	2	0	0	0	2	0	0	0	-1	2	2	2	0	0	0	0	0	0	2	2	2	2	0	2	2	2	0	0	0	0	0	2	2	0	0	0	0	0	0	2	2	2	0	2
wsnp_RFL_Contig4734_5671036	0	2	0	2	0	2	0	0	-1	2	0	0	0	-1	2	2	2	0	0	0	0	0	0	2	2	2	2	0	2	2	2	0	0	0	0	0	2	2	0	0	0	0	0	-1	2	2	2	0	2
Excalibur_rep_c102501_63	0	-1	0	2	0	2	0	0	0	2	0	0	0	-1	2	2	2	0	0	0	0	0	0	2	2	2	2	0	2	2	2	0	0	0	0	0	2	2	0	0	0	0	0	0	2	2	2	0	2
IAAV2383	0	2	0	2	0	2	0	0	0	2	0	0	0	2	2	2	2	0	0	0	0	0	0	2	2	2	2	0	2	2	2	0	0	0	0	0	2	2	0	0	0	0	0	0	2	2	2	0	2
BobWhite_c8340_511	0	2	0	2	0	2	0	0	-1	2	0	0	0	-1	2	2	2	0	0	0	0	0	0	2	2	2	2	0	2	2	2	0	0	0	0	0	2	2	0	0	0	0	0	0	2	2	2	0	2
BS00048031_51	0	2	0	2	0	2	0	0	-1	2	0	0	0	-1	2	2	2	0	0	0	0	0	0	2	2	2	2	0	2	2	2	0	0	0	0	0	2	2	0	0	0	0	0	-1	2	2	2	0	2
BS00070870_51	0	2	0	2	0	2	0	0	2	2	0	0	0	2	2	2	2	0	0	0	0	0	0	2	2	2	2	0	2	2	2	0	0	0	0	0	2	2	0	0	0	0	0	0	2	2	2	0	2
BS00101401_51	0	-1	0	2	0	2	0	0	-1	2	0	0	0	-1	2	2	2	0	0	0	0	0	0	2	2	2	2	0	2	2	2	0	0	0	0	0	2	2	0	0	0	0	0	-1	2	2	2	0	2
Excalibur_c46082_440	0	2	0	2	0	2	0	0	-1	2	0	0	0	-1	2	2	2	0	0	0	0	0	0	2	2	2	2	0	2	2	2	0	0	0	0	0	2	2	0	0	0	0	0	-1	2	2	2	0	2
GENE-1606_307	0	2	0	2	0	2	0	0	-1	2	0	0	0	-1	2	2	2	0	0	0	0	0	0	2	2	2	2	0	2	2	2	0	0	0	0	0	2	2	0	0	0	0	0	-1	2	2	2	0	2
GENE-3343_183	0	2	0	2	0	2	0	0	-1	2	0	0	0	-1	2	2	2	0	0	0	0	0	0	2	2	2	2	0	2	2	2	0	0	0	0	0	2	2	0	0	0	0	0	-1	2	2	2	0	2
IAAV5030	0	-1	0	2	0	2	0	0	-1	2	0	0	0	-1	2	2	2	0	0	0	0	0	0	2	2	2	2	0	2	2	2	0	0	0	0	0	2	2	0	0	0	0	0	-1	2	2	2	0	2
IAAV8768	0	2	0	2	0	2	0	0	-1	2	0	0	0	-1	2	2	2	0	0	0	0	0	0	2	2	2	2	0	2	2	2	0	0	0	0	0	2	2	0	0	0	0	0	-1	2	2	2	0	2
Ku_c12383_1105	0	2	0	2	0	2	0	0	-1	2	0	0	0	-1	2	2	2	0	0	0	0	0	0	2	2	2	2	0	2	2	2	0	0	0	0	0	2	2	0	0	0	0	0	-1	2	2	2	0	2
Ku_c14313_1194	0	2	0	2	0	2	0	0	-1	2	0	0	0	-1	2	2	2	0	0	0	0	0	0	2	2	2	2	0	2	2	2	0	0	0	0	0	2	2	0	0	0	0	0	-1	2	2	2	0	2
Ku_c68484_1276	0	2	0	2	0	2	0	0	-1	2	0	0	0	-1	2	2	2	0	0	0	0	0	0	2	2	2	2	0	2	2	2	0	0	0	0	0	2	2	0	0	0	0	0	-1	2	2	2	0	2
Kukri_c20889_526	0	2	0	2	0	2	0	0	-1	2	0	0	0	-1	2	2	2	0	0	0	0	0	0	2	2	2	2	0	2	2	2	0	0	0	0	0	2	2	0	0	0	0	0	-1	2	2	2	0	2
Kukri_c25564_185	0	2	0	2	0	2	0	0	2	2	0	0	0	2	2	2	2	0	0	0	0	0	0	2	2	2	2	0	2	2	2	0	0	0	0	0	2	2	0	0	0	0	0	2	2	2	2	0	2
Ra_c38505_544	0	2	0	2	0	2	0	0	-1	2	0	0	0	2	2	2	2	0	0	0	0	0	0	2	2	2	2	0	2	2	2	0	0	0	0	0	2	2	0	0	0	0	0	-1	2	2	2	0	2
Ra_c38505_555	0	2	0	2	0	2	0	0	2	2	0	0	0	2	2	2	2	0	0	0	0	0	0	2	2	2	2	0	2	2	2	0	0	0	0	0	2	2	0	0	0	0	0	0	2	2	2	0	2
Ra_c72106_227	0	-1	0	2	0	2	0	0	-1	2	0	0	0	-1	2	2	2	0	0	0	0	0	0	2	2	2	2	0	2	2	2	0	0	0	0	0	2	2	0	0	0	0	0	-1	2	2	2	0	2
RAC875_c17907_181	0	-1	0	2	0	2	0	0	-1	2	0	0	0	-1	2	2	2	0	0	0	0	0	0	2	2	2	2	0	2	2	2	0	0	0	0	0	2	2	0	0	0	0	0	-1	2	2	2	0	2
RAC875_c19138_402	0	2	0	2	0	2	0	0	-1	2	0	0	0	-1	2	2	2	0	0	0	0	0	0	2	2	2	2	0	2	2	2	0	0	0	0	0	2	2	0	0	0	0	0	-1	2	2	2	0	2
RAC875_c2786_1097	0	2	0	2	0	2	0	0	-1	2	0	0	0	-1	2	2	2	0	0	0	0	0	0	2	2	2	2	0	2	2	2	0	0	0	0	0	2	2	0	0	0	0	0	0	2	2	2	0	2
RAC875_c67309_634	0	2	0	2	0	2	0	0	-1	2	0	0	0	-1	2	2	2	0	0	0	0	0	0	2	2	2	2	0	2	2	2	0	0	0	0	0	2	2	0	0	0	0	0	-1	2	2	2	0	2
RAC875_c8010_155	0	2	0	2	0	2	0	0	-1	2	0	0	0	-1	2	2	2	0	0	0	0	0	0	2	2	2	2	0	2	2	2	0	0	0	0	0	2	2	0	0	0	0	0	-1	2	2	2	0	2
RAC875_c842_1476	0	2	0	2	0	2	0	0	-1	2	0	0	0	-1	2	2	2	0	0	0	0	0	0	2	2	2	2	0	2	2	2	0	0	0	0	0	2	2	0	0	0	0	0	0	2	2	2	0	2
RAC875_c842_1516	0	2	0	2	0	2	0	0	-1	2	0	0	0	-1	2	2	2	0	0	0	0	0	0	2	2	2	2	0	2	2	2	0	0	0	0	0	2	2	0	0	0	0	0	0	2	2	2	0	2
RAC875_rep_c105428_270	0	2	0	2	0	2	0	0	-1	2	0	0	0	-1	2	2	2	0	0	0	0	0	0	2	2	2	2	0	2	2	2	0	0	0	0	0	2	2	0	0	0	0	0	-1	2	2	2	0	2
RAC875_rep_c111698_383	0	2	0	2	0	2	0	0	-1	2	0	0	0	2	2	2	2	0	0	0	0	0	0	2	2	2	2	0	2	2	2	0	0	0	0	0	2	2	0	0	0	0	0	-1	2	2	2	0	2
RAC875_rep_c117959_132	0	-1	0	2	0	2	0	0	-1	2	0	0	0	-1	2	2	2	0	0	0	0	0	0	2	2	2	2	0	2	2	2	0	0	0	0	0	2	2	0	0	0	0	0	-1	2	2	2	0	2
RFL_Contig1034_2351	0	2	0	2	0	2	0	0	-1	2	0	0	0	-1	2	2	2	0	0	0	0	0	0	2	2	2	2	0	2	2	2	0	0	0	0	0	2	2	0	0	0	0	0	0	2	2	2	0	2
RFL_Contig4921_2420	0	2	0	2	0	2	0	0	-1	2	0	0	0	-1	2	2	2	0	0	0	0	0	0	2	2	2	2	0	2	2	2	0	0	0	0	0	2	2	0	0	0	0	0	0	2	2	2	0	2
Tdurum_contig11121_834	0	2	0	2	0	2	0	0	-1	2	0	0	0	-1	2	2	2	0	0	0	0	0	0	2	2	2	2	0	2	2	2	0	0	0	0	0	2	2	0	0	0	0	0	-1	2	2	2	0	2
Tdurum_contig51995_377	0	-1	0	2	0	2	0	0	-1	2	0	0	0	-1	2	2	2	0	0	0	0	0	0	2	2	2	2	0	2	2	2	0	0	0	0	0	2	2	0	0	0	0	0	0	2	2	2	0	2
Tdurum_contig51995_474	0	-1	0	2	0	2	0	0	0	2	0	0	0	0	2	2	2	0	0	0	0	0	0	2	2	2	2	0	2	2	2	0	0	0	0	0	2	2	0	0	0	0	0	0	2	2	2	0	2
wsnp_Ex_c11807_18960045	0	2	0	2	0	2	0	0	-1	2	0	0	0	-1	2	2	2	0	0	0	0	0	0	2	2	2	2	0	2	2	2	0	0	0	0	0	2	2	0	0	0	0	0	0	2	2	2	0	2
wsnp_Ex_c12269_19597341	0	2	0	2	0	2	0	0	0	2	0	0	0	2	2	2	2	0	0	0	0	0	0	2	2	2	2	0	2	2	2	0	0	0	0	0	2	2	0	0	0	0	0	0	2	2	2	0	2
wsnp_Ex_c12269_19597415	0	2	0	2	0	2	0	0	-1	2	0	0	0	-1	2	2	2	0	0	0	0	0	0	2	2	2	2	0	2	2	2	0	0	0	0	0	2	2	0	0	0	0	0	-1	2	2	2	0	2
wsnp_Ex_c12871_20400823	0	2	0	2	0	2	0	0	2	2	0	0	0	2	2	2	2	0	0	0	0	0	0	2	2	2	2	0	2	2	2	0	0	0	0	0	2	2	0	0	0	0	0	-1	2	2	2	0	2
wsnp_Ex_c1335_2556442	0	-1	0	2	0	2	0	0	-1	2	0	0	0	-1	2	2	2	0	0	0	0	0	0	2	2	2	2	0	2	2	2	0	0	0	0	0	2	2	0	0	0	0	0	0	2	2	2	0	2
wsnp_Ex_c18637_27508578	0	2	0	2	0	2	0	0	0	2	0	0	0	2	2	2	2	0	0	0	0	0	0	2	2	2	2	0	2	2	2	0	0	0	0	0	2	2	0	0	0	0	0	0	2	2	2	0	2
wsnp_Ex_c2331_4369782	0	2	0	2	0	2	0	0	0	2	0	0	0	-1	2	2	2	0	0	0	0	0	0	2	2	2	2	0	2	2	2	0	0	0	0	0	2	2	0	0	0	0	0	0	2	2	2	0	2
wsnp_Ex_c24731_33983680	0	2	0	2	0	2	0	0	-1	2	0	0	0	-1	2	2	2	0	0	0	0	0	0	2	2	2	2	0	2	2	2	0	0	0	0	0	2	2	0	0	0	0	0	-1	2	2	2	0	2
wsnp_Ex_c2502_4675968	0	2	0	2	0	2	0	0	-1	2	0	0	0	-1	2	2	2	0	0	0	0	0	0	2	2	2	2	0	2	2	2	0	0	0	0	0	2	2	0	0	0	0	0	-1	2	2	2	0	2
wsnp_Ex_c25668_34932304	0	-1	0	2	0	2	0	0	-1	2	0	0	0	-1	2	2	2	0	0	0	0	0	0	2	2	2	2	0	2	2	2	0	0	0	0	0	2	2	0	0	0	0	0	0	2	2	2	0	2
wsnp_Ex_c25668_34932560	0	-1	0	2	0	2	0	0	0	2	0	0	0	0	2	2	2	0	0	0	0	0	0	2	2	2	2	0	2	2	2	0	0	0	0	0	2	2	0	0	0	0	0	0	2	2	2	0	2
wsnp_Ex_c35073_43285821	0	-1	0	2	0	2	0	0	0	2	0	0	0	-1	2	2	2	0	0	0	0	0	0	2	2	2	2	0	2	2	2	0	0	0	0	0	2	2	0	0	0	0	0	0	2	2	2	0	2
wsnp_Ex_c37208_45002588	0	2	0	2	0	2	0	0	-1	2	0	0	0	-1	2	2	2	0	0	0	0	0	0	2	2	2	2	0	2	2	2	0	0	0	0	0	2	2	0	0	0	0	0	-1	2	2	2	0	2
wsnp_Ex_c41283_48140956	0	2	0	2	0	2	0	0	0	2	0	0	0	-1	2	2	2	0	0	0	0	0	0	2	2	2	2	0	2	2	2	0	0	0	0	0	2	2	0	0	0	0	0	0	2	2	2	0	2
wsnp_Ex_c47907_52974924	0	2	0	2	0	2	0	0	-1	2	0	0	0	-1	2	2	2	0	0	0	0	0	0	2	2	2	2	0	2	2	2	0	0	0	0	0	2	2	0	0	0	0	0	0	2	2	2	0	2
wsnp_Ex_c9510_15761235	0	2	0	2	0	2	0	0	-1	2	0	0	0	-1	2	2	2	0	0	0	0	0	0	2	2	2	2	0	2	2	2	0	0	0	0	0	2	2	0	0	0	0	0	-1	2	2	2	0	2
wsnp_Ex_rep_c69034_67934852	0	2	0	2	0	2	0	0	-1	2	0	0	0	-1	2	2	2	0	0	0	0	0	0	2	2	2	2	0	2	2	2	0	0	0	0	0	2	2	0	0	0	0	0	-1	2	2	2	0	2
wsnp_JD_c3034_4017676	0	2	0	2	0	2	0	0	-1	2	0	0	0	-1	2	2	2	0	0	0	0	0	0	2	2	2	2	0	2	2	2	0	0	0	0	0	2	2	0	0	0	0	0	0	2	2	2	0	2
wsnp_Ku_c3286_6111360	0	2	0	2	0	2	0	0	-1	2	0	0	0	-1	2	2	2	0	0	0	0	0	0	2	2	2	2	0	2	2	2	0	0	0	0	0	2	2	0	0	0	0	0	-1	2	2	2	0	2
wsnp_Ku_c5243_9344536	0	-1	0	2	0	2	0	0	0	2	0	0	0	-1	2	2	2	0	0	0	0	0	0	2	2	2	2	0	2	2	2	0	0	0	0	0	2	2	0	0	0	0	0	0	2	2	2	0	2
wsnp_Ra_c10669_17515792	0	2	0	2	0	2	0	0	-1	2	0	0	0	-1	2	2	2	0	0	0	0	0	0	2	2	2	2	0	2	2	2	0	0	0	0	0	2	2	0	0	0	0	0	0	2	2	2	0	2
wsnp_Ra_c35889_44345459	0	-1	0	2	0	2	0	0	-1	2	0	0	0	-1	2	2	2	0	0	0	0	0	0	2	2	2	2	0	2	2	2	0	0	0	0	0	2	2	0	0	0	0	0	-1	2	2	2	0	2
wsnp_Ra_c4858_8709000	0	-1	0	2	0	2	0	0	-1	2	0	0	0	-1	2	2	2	0	0	0	0	0	0	2	2	2	2	0	2	2	2	0	0	0	0	0	2	2	0	0	0	0	0	-1	2	2	2	0	2
BS00076630_51	0	2	0	2	0	2	0	0	-1	2	0	0	0	-1	2	2	2	0	0	0	0	0	0	2	2	2	2	0	2	2	2	0	0	0	0	0	2	2	0	0	0	0	0	-1	2	2	2	0	2
Kukri_c82117_279	0	-1	0	2	0	2	0	0	0	2	0	0	0	-1	2	2	2	0	0	0	0	0	0	2	2	2	2	0	2	2	2	0	0	0	0	0	2	2	0	0	0	0	0	0	2	2	2	0	2
wsnp_Ex_c8376_14113519	0	2	0	2	0	2	0	0	0	2	0	0	0	0	2	2	2	0	0	0	0	0	0	2	2	2	2	0	2	2	2	0	0	0	0	0	2	2	0	0	0	0	0	0	2	2	2	0	2
Excalibur_c26754_433	0	2	0	2	0	2	0	0	0	2	0	0	0	-1	2	2	2	0	0	0	0	0	0	2	2	2	2	0	2	2	2	0	0	0	0	0	2	2	0	0	0	0	0	0	2	2	2	0	2
GENE-1469_196	0	2	0	2	0	2	0	0	0	2	0	0	0	0	2	2	2	0	0	0	0	0	0	2	2	2	2	0	2	2	2	0	0	0	0	0	2	2	0	0	0	0	0	0	2	2	2	0	2
IAAV3900	0	2	0	2	0	2	0	0	0	2	0	0	0	0	2	2	2	0	0	0	0	0	0	2	2	2	2	0	2	2	2	0	0	0	0	0	2	2	0	0	0	0	0	0	2	2	2	0	2
Ku_c13307_1116	0	2	0	2	0	2	0	0	0	2	0	0	0	0	2	2	2	0	0	0	0	0	0	2	2	2	2	0	2	2	2	0	0	0	0	0	2	2	0	0	0	0	0	0	2	2	2	0	2
wsnp_Ra_c11291_18338838	0	2	0	2	0	2	0	0	0	2	0	0	0	0	2	2	2	0	0	0	0	0	0	2	2	2	2	0	2	2	2	0	0	0	0	0	2	2	0	0	0	0	0	0	2	2	2	0	2
CAP8_c1393_327	0	2	0	2	0	2	0	0	0	2	0	0	0	0	2	2	2	0	0	0	0	0	0	2	2	2	2	0	2	2	2	0	0	0	0	0	2	2	0	0	0	0	0	0	2	2	2	0	2
Excalibur_c47907_517	0	2	0	2	0	2	0	0	0	2	0	0	0	0	2	2	2	0	0	0	0	0	0	2	2	2	2	0	2	2	2	0	0	0	0	0	2	2	0	0	0	0	0	0	2	2	2	0	2
Ku_c53625_627	0	2	0	2	0	2	0	0	0	2	0	0	0	0	2	2	2	0	0	0	0	0	0	2	2	2	2	0	2	2	2	0	0	0	0	0	2	2	0	0	0	0	0	0	2	2	2	0	2
wsnp_Ex_c15269_23491104	0	2	0	2	0	2	0	0	0	2	0	0	0	-1	2	2	2	0	0	0	0	0	0	2	2	2	2	0	2	2	2	0	0	0	0	0	2	2	0	0	0	0	0	-1	2	2	2	0	2
Tdurum_contig31037_205	0	2	0	2	0	2	0	0	0	2	0	0	0	2	2	2	2	0	0	0	0	0	0	2	2	2	2	0	2	2	2	0	0	0	2	0	2	2	0	0	0	0	0	0	2	2	2	0	2
Excalibur_c33545_134	0	2	0	2	0	2	0	0	-1	2	0	0	0	-1	2	2	2	0	0	0	0	0	0	2	2	2	2	0	2	2	2	0	0	0	2	0	2	2	0	0	0	0	0	-1	2	2	2	0	2
wsnp_Ex_c28930_38008757	0	-1	0	2	0	2	0	0	-1	2	0	0	0	-1	2	2	2	0	0	0	0	0	0	2	2	2	2	0	2	2	2	0	0	0	2	0	2	2	0	0	0	0	0	-1	2	2	2	0	2
wsnp_Ku_c23901_33846711	0	2	0	2	0	2	0	0	-1	2	0	0	0	-1	2	2	2	0	0	0	0	0	0	2	2	2	2	0	2	2	2	0	0	0	2	0	2	2	0	0	0	0	0	0	2	2	2	0	2
wsnp_Ra_c34117_42876812	0	2	0	2	0	2	0	0	-1	2	0	0	0	-1	2	2	2	0	0	0	0	0	0	2	2	2	2	0	2	2	2	0	0	0	2	0	2	2	0	0	0	0	0	-1	2	2	2	0	2
BS00003971_51	0	2	0	2	0	2	0	0	-1	2	0	0	0	-1	2	2	2	0	0	0	0	0	0	2	2	2	2	0	2	2	2	0	0	0	2	0	2	2	0	0	0	0	0	0	2	2	2	0	2
IACX6277	0	-1	0	2	0	2	0	0	-1	2	0	0	0	-1	2	2	2	0	0	0	0	0	0	2	2	2	2	0	2	2	2	0	0	0	2	0	2	2	0	0	0	0	0	-1	2	2	2	0	2
Ku_c70534_1215	0	2	0	2	0	2	0	0	-1	2	0	0	0	-1	2	2	2	0	0	0	0	0	0	2	2	2	2	0	2	2	2	0	0	0	2	0	2	2	0	0	0	0	0	-1	2	2	2	0	2
RAC875_c58159_521	0	2	0	2	0	2	0	0	-1	2	0	0	0	-1	2	2	2	0	0	0	0	0	0	2	2	2	2	0	2	2	2	0	0	0	2	0	2	2	0	0	0	0	0	-1	2	2	2	0	2
RAC875_s120038_124	0	2	0	2	0	2	0	0	-1	2	0	0	0	-1	2	2	2	0	0	0	0	0	0	2	2	2	2	0	2	2	2	0	0	0	2	0	2	2	0	0	0	0	0	-1	2	2	2	0	2
Tdurum_contig49981_703	0	2	0	2	0	2	0	0	-1	2	0	0	0	-1	2	2	2	0	0	0	0	0	0	2	2	2	2	0	2	2	2	0	0	0	2	0	2	2	0	0	0	0	0	-1	2	2	2	0	2
wsnp_Ex_c12750_20243224	0	2	0	2	0	2	0	0	-1	2	0	0	0	-1	2	2	2	0	0	0	0	0	0	2	2	2	2	0	2	2	2	0	0	0	2	0	2	2	0	0	0	0	0	0	2	2	2	0	2
wsnp_Ex_c27150_36365659	0	2	0	2	0	2	0	0	0	2	0	0	0	-1	2	2	2	0	0	0	0	0	0	2	2	2	2	0	2	2	2	0	0	0	2	0	2	2	0	0	0	0	0	0	2	2	2	0	2
wsnp_Ex_rep_c69864_68823765	0	2	0	2	0	2	0	0	-1	2	0	0	0	-1	2	2	2	0	0	0	0	0	0	2	2	2	2	0	2	2	2	0	0	0	2	0	2	2	0	0	0	0	0	-1	2	2	2	0	2
wsnp_Ex_rep_c69864_68824236	0	2	0	2	0	2	0	0	-1	2	0	0	0	-1	2	2	2	0	0	0	0	0	0	2	2	2	2	0	2	2	2	0	0	0	2	0	2	2	0	0	0	0	0	-1	2	2	2	0	2
wsnp_Ex_rep_c69864_68824319	0	2	0	2	0	2	0	0	-1	2	0	0	0	2	2	2	2	0	0	0	0	0	0	2	2	2	2	0	2	2	2	0	0	0	2	0	2	2	0	0	0	0	0	-1	2	2	2	0	2
wsnp_Ex_rep_c66685_65003087	0	2	0	2	0	2	0	0	0	2	0	0	0	-1	2	2	2	0	0	0	0	0	0	2	2	2	2	0	2	2	2	0	0	0	2	0	2	2	0	0	0	0	0	-1	2	2	2	0	2
RAC875_c17479_359	0	2	0	2	0	2	0	0	0	2	0	0	0	2	2	2	2	0	0	0	0	0	0	2	2	2	2	0	2	2	2	0	0	0	2	0	2	2	0	0	0	0	0	0	2	2	2	0	2
Kukri_c37815_53	0	2	0	2	2	2	0	0	2	2	0	0	0	2	2	2	2	0	0	0	0	0	0	2	2	2	2	0	2	2	2	0	0	0	2	0	2	2	0	0	0	0	0	-1	2	2	2	0	2
Kukri_c5615_1214	0	2	0	2	2	2	0	0	-1	2	0	0	0	2	2	2	2	0	0	0	0	0	0	2	2	2	2	0	2	2	2	0	0	0	2	0	2	2	0	0	0	0	0	0	2	2	2	0	2
Excalibur_rep_c107798_68	0	2	0	2	2	2	0	0	0	2	0	0	0	0	2	2	2	0	0	0	0	0	0	2	2	2	2	2	2	2	2	0	0	0	2	0	2	2	0	0	2	0	0	0	2	2	2	0	2
CAP12_c1787_110	0	2	0	2	2	2	0	0	2	2	0	0	0	2	2	2	2	0	0	0	0	0	0	2	2	2	2	2	2	2	2	0	0	0	2	0	2	2	0	0	2	0	0	0	2	2	2	0	2
Tdurum_contig50389_317	0	2	0	2	2	2	0	0	2	2	0	0	0	-1	2	2	2	0	0	0	0	0	0	2	2	2	2	2	2	2	2	0	0	0	2	0	2	2	0	0	2	0	0	-1	2	2	2	0	2
wsnp_Ku_c44716_51926415	0	2	0	2	2	2	0	0	2	2	0	0	0	2	2	2	2	0	0	0	0	0	0	2	2	2	2	2	2	2	2	0	0	0	2	0	2	2	0	0	2	0	0	0	2	2	2	0	2
Kukri_c51055_311	0	2	0	2	2	2	0	0	2	2	0	0	0	-1	2	2	2	0	0	0	0	0	0	2	2	2	2	2	2	-1	2	0	0	0	2	0	2	2	0	0	2	0	0	-1	2	2	2	0	2
Kukri_c60531_131	0	-1	0	2	2	2	0	0	2	2	0	0	0	-1	2	2	2	0	0	0	0	0	0	2	2	2	2	2	2	2	2	0	0	0	2	0	2	2	0	0	2	0	0	-1	2	2	2	0	2
BobWhite_c23344_457	0	2	0	2	2	2	0	0	-1	2	2	0	0	-1	2	2	2	0	0	0	0	0	0	2	2	2	2	2	2	0	2	0	0	0	2	0	0	2	0	0	2	0	0	-1	2	2	2	0	2
BobWhite_c16616_482	0	2	0	2	2	2	0	0	-1	2	2	0	0	-1	2	2	2	0	0	0	0	0	0	2	2	2	2	2	2	0	2	0	0	0	2	0	0	2	0	0	2	0	0	0	2	2	2	0	2
Tdurum_contig42827_1693	0	2	0	2	2	2	0	0	-1	2	2	0	0	2	2	2	2	0	0	0	0	0	0	2	2	2	2	2	2	0	2	0	0	0	2	0	0	2	0	0	2	0	0	-1	2	2	2	0	2
BS00014695_51	0	-1	0	2	2	2	0	0	-1	2	2	0	0	-1	2	2	2	0	0	0	0	0	0	2	2	2	2	2	2	0	2	0	0	0	2	0	0	2	0	0	2	0	0	-1	2	2	2	0	2
IAAV8483	0	-1	0	2	2	2	0	0	-1	2	2	0	0	-1	2	2	2	0	0	0	0	0	0	2	2	2	2	2	2	0	2	0	0	0	2	0	0	2	0	0	2	0	0	-1	2	2	2	0	2
RAC875_c5056_220	0	2	0	2	2	2	0	0	2	2	2	0	0	0	2	2	2	0	0	0	0	0	0	2	2	2	2	2	2	0	2	0	0	0	2	0	0	2	0	0	2	0	0	0	2	2	2	0	2
BS00066319_51	0	2	0	2	2	2	0	0	-1	2	2	0	0	-1	2	2	2	0	0	0	0	0	0	2	2	2	2	2	2	0	2	0	0	0	2	0	0	2	0	0	2	0	0	-1	2	2	2	0	2
Excalibur_c39248_485	0	-1	0	2	2	2	0	0	-1	2	2	0	0	-1	2	2	2	0	0	0	0	0	0	2	2	2	2	2	2	-1	2	0	0	0	2	0	0	2	0	0	2	0	0	-1	2	2	2	0	2
Kukri_c97654_90	0	2	0	-1	2	2	0	0	2	2	2	0	0	0	2	2	2	0	0	0	0	0	0	2	2	2	2	2	2	0	2	0	0	0	2	0	0	2	0	0	2	0	0	0	2	2	2	0	2
BS00073525_51	0	-1	0	2	2	2	0	0	-1	2	2	0	0	-1	2	2	2	0	0	0	0	0	0	2	2	2	2	2	2	0	2	0	0	0	2	0	0	2	0	0	2	0	0	-1	2	2	2	0	2
wsnp_Ku_c18497_27803432	0	2	0	2	2	2	0	0	2	2	2	0	0	2	2	2	2	0	0	0	0	0	0	2	2	2	2	2	2	0	2	0	0	0	2	0	0	2	0	0	2	0	0	0	2	2	2	0	2
GENE-1634_405	0	2	0	2	2	2	0	0	2	2	2	0	0	2	2	2	2	0	0	0	0	0	0	2	2	2	2	2	2	2	2	0	0	0	2	0	0	2	0	0	2	0	0	-1	2	2	2	0	2
TA001383-0516	0	2	0	2	2	2	0	0	2	2	2	0	0	2	2	2	2	0	0	0	0	0	0	2	2	2	2	2	2	2	2	0	0	0	2	0	0	2	0	0	2	0	0	0	2	2	2	0	2
Kukri_c33640_640	0	-1	0	2	2	2	0	0	-1	2	2	0	0	-1	2	2	2	0	0	0	0	0	0	2	2	2	2	2	2	2	2	0	0	0	2	0	0	2	0	0	2	0	0	-1	2	2	2	0	2
Excalibur_c60581_62	0	2	0	2	2	2	0	0	2	2	2	0	0	2	2	2	2	0	0	0	0	0	0	2	2	2	2	2	2	2	2	0	0	0	2	0	0	2	0	0	2	0	0	-1	2	2	2	0	2
BS00047668_51	0	2	0	2	2	2	0	0	2	2	2	0	0	2	2	2	2	0	0	0	0	0	0	2	2	2	2	2	2	2	2	0	0	0	2	0	0	2	0	0	2	0	0	-1	2	2	2	0	2
Kukri_rep_c102151_697	0	0	0	0	2	2	0	0	2	2	0	2	2	2	0	0	2	0	0	-1	0	0	0	2	2	2	2	0	2	2	2	2	0	0	2	0	0	2	0	2	0	0	0	0	0	2	2	0	2
TA002540-0938	0	0	0	0	2	2	0	0	2	2	0	2	2	2	0	0	2	0	0	0	0	0	0	2	2	2	2	0	2	2	2	2	0	0	2	0	0	2	0	2	0	0	0	0	0	2	2	0	2
RAC875_c52195_324	0	0	0	0	2	2	0	0	2	2	0	2	2	2	-1	0	2	0	0	0	0	-1	0	2	2	2	2	0	2	0	2	2	0	0	2	0	0	2	0	2	0	0	0	0	0	2	2	0	0
Kukri_s110037_62	0	0	0	0	2	2	0	0	2	2	0	2	2	2	0	0	2	0	0	0	0	0	0	2	2	2	2	0	2	2	2	2	0	0	2	0	0	2	0	2	0	0	0	0	0	2	2	0	0
BS00065734_51	0	0	0	0	2	2	0	0	2	2	0	2	2	-1	-1	0	2	0	0	0	0	0	0	2	2	2	2	0	2	2	2	2	0	0	2	0	0	2	0	2	0	0	0	0	0	2	2	0	0
Excalibur_c3969_1208	0	0	0	0	2	2	0	0	-1	2	0	2	2	-1	-1	0	2	0	0	0	0	0	0	2	2	2	2	0	2	2	2	2	0	0	2	0	0	2	0	2	0	0	0	0	0	2	2	0	0
Tdurum_contig55841_351	0	0	2	0	2	2	2	0	2	2	2	2	2	2	0	0	0	2	2	0	0	0	0	2	2	2	2	0	2	2	2	2	0	0	0	0	2	2	0	2	0	0	0	0	0	2	2	0	0
GENE-3665_61	0	-1	2	0	2	2	2	0	2	2	2	2	2	2	-1	0	0	2	2	0	0	0	0	2	2	2	2	0	2	0	2	2	0	0	0	0	2	2	0	2	0	0	0	0	0	2	2	0	0
BobWhite_c12428_371	0	-1	2	0	2	2	2	0	2	2	2	2	2	-1	-1	0	0	2	2	0	0	0	0	2	2	2	0	0	2	2	2	2	0	0	0	0	2	2	0	2	0	0	0	0	0	2	2	0	0
BS00030652_51	0	-1	2	0	2	2	2	0	-1	2	2	2	2	2	-1	0	0	2	2	0	0	0	0	2	2	2	0	0	2	2	2	2	0	0	0	0	2	2	0	2	0	0	0	0	0	2	2	0	0
BS00041742_51	0	0	2	0	2	2	2	0	2	2	2	2	2	2	-1	0	0	2	2	0	0	0	0	2	2	2	0	0	2	2	2	2	0	0	0	0	2	2	0	2	0	0	0	0	0	2	2	0	0
BS00065673_51	0	0	2	0	2	2	2	0	2	2	2	2	2	2	-1	0	0	2	2	0	0	0	0	2	2	2	0	0	2	2	2	2	0	0	0	0	2	2	0	2	0	0	0	0	0	2	2	0	0
BS00076751_51	0	0	2	0	2	2	2	0	2	2	2	2	2	2	0	0	0	2	2	0	0	0	0	2	2	2	0	0	2	2	2	2	0	0	0	0	2	2	0	2	0	0	0	0	0	2	2	0	0
Kukri_c25871_124	0	0	2	0	2	2	2	0	2	2	2	2	2	2	0	0	0	2	2	0	0	0	0	2	2	2	0	0	2	2	2	2	0	0	0	0	2	2	0	2	0	0	0	0	0	2	2	0	0
Kukri_rep_c86903_184	0	-1	2	0	2	2	2	0	2	2	2	2	2	2	0	0	0	2	2	0	0	0	0	2	2	2	0	0	2	2	2	2	0	0	0	0	2	2	0	2	0	0	0	0	0	2	2	0	0
BS00077819_51	0	-1	2	0	2	2	2	0	2	2	2	2	2	2	-1	0	0	2	2	0	0	0	0	2	2	2	0	0	2	0	2	2	0	0	0	0	2	2	0	2	0	0	0	0	0	2	2	0	0
Kukri_c30244_619	0	2	2	0	2	2	2	0	2	2	2	2	2	2	2	0	0	2	2	0	0	0	0	2	2	2	0	0	2	0	2	2	0	0	0	0	2	2	0	2	0	0	0	0	0	2	2	0	0
wsnp_BE604885A_Ta_2_1	0	-1	2	0	2	2	2	0	2	2	2	2	2	2	-1	0	0	2	2	0	0	0	0	2	2	2	0	0	2	0	2	2	0	0	0	0	2	2	0	2	0	0	0	0	0	2	2	0	0
wsnp_Ra_c4373_7946257	0	0	2	0	2	2	2	0	2	2	2	2	2	2	2	0	0	2	2	0	0	0	0	2	2	2	0	0	2	0	2	2	0	0	0	0	2	2	0	2	0	0	0	0	0	2	2	0	0
BS00023028_51	0	-1	2	0	2	2	2	0	-1	2	2	2	2	-1	-1	0	0	2	2	0	0	0	0	2	2	2	0	0	2	0	2	2	0	0	0	0	2	2	0	2	0	0	0	0	0	2	2	0	0
Excalibur_c24829_189	0	-1	2	0	2	2	2	0	2	2	2	2	2	2	-1	0	0	2	2	0	0	0	0	2	2	2	0	0	2	0	2	2	0	0	0	0	2	2	0	2	0	0	0	0	0	2	2	0	0
wsnp_Ex_c10630_17338703	0	-1	2	0	2	2	2	0	2	2	2	2	2	2	-1	0	0	2	2	0	0	0	0	2	2	2	0	0	2	0	2	2	0	0	0	0	2	2	0	2	0	0	0	0	0	2	2	0	0
Kukri_c51666_401	0	2	2	0	2	2	2	0	2	2	2	2	0	2	0	0	0	2	2	0	0	0	0	2	2	2	0	2	2	0	2	2	0	2	2	0	0	2	0	2	2	0	0	0	-1	2	0	0	0
Kukri_s117946_404	0	2	2	0	2	2	2	0	2	2	2	2	0	2	0	0	0	2	2	0	0	0	0	2	2	2	0	2	2	0	2	2	0	2	2	0	0	2	0	2	2	0	0	0	0	2	0	0	0
RAC875_c35074_452	0	2	2	0	2	2	2	0	2	2	2	2	0	2	0	0	0	2	2	0	0	0	0	2	2	2	0	2	2	0	2	2	0	2	2	0	0	2	0	2	2	0	0	0	0	2	0	0	0
GENE-1934_182	0	2	2	0	2	2	2	0	2	2	2	2	0	2	0	0	0	2	2	0	0	0	0	2	2	2	0	2	2	0	2	2	0	2	2	0	0	2	0	2	2	0	0	0	-1	2	0	0	0
RAC875_c68056_81	0	2	2	0	2	2	2	0	2	2	2	2	0	2	0	0	0	2	2	0	0	0	0	2	2	2	0	2	2	0	2	2	0	2	2	0	0	2	0	2	2	0	0	0	0	2	0	0	0
Tdurum_contig10458_460	0	2	2	0	2	2	2	2	2	2	2	2	0	2	0	0	0	2	2	0	0	0	0	2	2	2	0	2	2	-1	2	2	0	2	2	0	0	2	0	2	2	0	0	0	-1	2	0	0	0
Tdurum_contig67686_633	0	2	2	0	2	2	2	2	2	2	2	2	0	2	0	0	0	2	2	0	0	0	0	2	2	2	0	2	2	0	2	2	0	2	2	0	0	2	0	2	2	0	0	0	-1	2	0	0	0
Tdurum_contig5009_349	0	2	2	0	2	2	2	2	-1	2	-1	-1	0	-1	0	0	0	-1	2	0	0	0	0	2	2	2	0	2	2	0	2	2	0	2	2	0	0	2	0	2	2	0	0	0	0	2	0	0	0
Tdurum_contig67686_792	0	2	2	0	2	2	2	2	2	2	2	2	0	2	0	0	0	2	2	0	0	0	0	2	2	2	0	2	2	0	2	2	0	2	2	0	0	2	0	2	2	0	0	0	0	2	0	0	0
Tdurum_contig67686_851	0	2	2	0	2	2	2	2	2	2	2	2	0	2	0	0	0	2	2	0	0	0	0	2	2	2	0	2	2	0	2	2	0	2	2	0	0	2	0	2	2	0	0	0	-1	2	0	0	0
Tdurum_contig62283_334	0	2	2	0	2	2	2	2	2	2	2	2	0	2	0	0	0	2	2	0	0	0	0	2	2	2	0	2	2	0	2	2	0	2	2	0	0	2	0	2	2	0	0	0	0	2	0	0	0
RAC875_c53037_181	0	2	2	0	2	2	2	2	2	2	2	2	0	2	0	0	0	2	2	0	0	0	0	2	2	2	0	2	2	0	2	0	0	2	2	0	0	2	0	2	2	0	0	0	-1	2	0	0	0
wsnp_Ex_c45877_51547406	0	2	2	0	2	2	2	2	2	2	2	2	0	2	0	0	0	2	2	0	0	0	0	2	2	2	0	2	2	2	2	0	0	2	2	0	0	2	0	2	2	0	0	0	-1	2	0	0	0
wsnp_Ra_c66411_64796843	0	2	2	0	2	2	2	2	2	2	2	2	0	2	0	0	0	2	2	0	0	0	0	2	2	2	0	2	2	2	2	0	0	2	2	0	0	2	0	2	2	0	0	0	-1	2	0	0	0
Ex_c30020_182	0	2	2	0	2	2	2	2	2	2	2	2	0	2	0	0	0	2	2	0	0	0	0	2	2	2	0	2	2	2	2	0	0	2	2	0	0	2	0	2	2	0	0	0	-1	2	0	0	0
TA005728-0374	0	2	2	0	2	2	0	2	2	2	2	2	0	2	0	0	0	0	2	0	0	0	0	2	2	2	0	2	2	2	2	0	0	2	2	0	0	2	0	2	2	0	0	0	-1	2	0	0	0
wsnp_Ex_c60462_60905848	0	2	2	0	2	2	0	2	2	2	2	2	0	2	0	0	0	0	2	0	0	0	0	2	2	2	0	2	2	0	2	0	0	2	2	0	0	2	0	2	2	0	0	0	-1	2	0	0	0
BobWhite_c8852_116	0	2	2	0	2	2	0	2	-1	2	2	2	0	-1	0	0	0	0	2	0	0	0	0	2	2	2	0	2	2	-1	2	0	0	2	2	0	0	2	0	2	2	0	0	0	0	2	0	0	0
RAC875_c75663_115	0	2	2	0	2	2	0	2	2	2	2	2	0	2	0	0	0	0	2	0	0	0	0	2	2	2	0	2	2	0	2	0	0	2	2	0	0	2	0	2	2	0	0	0	0	2	0	0	0
RAC875_c46236_214	0	2	2	0	2	2	0	2	-1	2	2	2	0	2	0	0	0	0	2	0	0	0	0	2	2	2	0	2	2	0	2	0	0	2	2	0	0	2	0	2	2	0	0	0	0	2	0	0	0
BobWhite_c47304_56	0	2	2	0	2	2	0	2	2	2	2	2	0	2	0	0	0	0	2	0	0	0	0	2	2	2	0	2	2	2	2	0	0	2	2	0	0	2	0	2	2	0	0	0	-1	2	0	0	0
Excalibur_rep_c116587_84	0	2	2	0	2	2	0	2	2	2	2	2	0	2	0	0	0	0	2	0	0	0	0	2	2	2	0	2	2	2	2	0	0	2	2	0	0	2	0	2	2	0	0	0	0	2	0	0	0
Tdurum_contig27982_568	0	2	2	0	2	2	0	2	2	2	2	2	0	2	0	0	0	0	2	0	0	0	0	2	2	2	0	2	2	2	2	0	0	2	2	0	0	2	0	2	2	0	0	0	0	2	0	0	0
BobWhite_c5246_474	0	2	2	0	2	2	0	2	2	2	2	2	0	2	0	0	0	0	2	0	0	0	0	2	2	2	0	2	2	2	2	0	0	2	2	0	0	2	0	2	2	0	0	0	-1	2	0	0	0
Tdurum_contig51914_740	0	2	2	0	2	2	0	2	2	2	2	2	0	2	0	0	0	0	2	0	0	0	0	2	2	2	0	2	2	2	2	0	0	2	2	0	0	2	0	2	2	0	0	0	0	2	0	0	0
Tdurum_contig55443_1361	0	2	2	0	2	2	0	2	2	2	2	2	0	2	0	0	0	0	2	0	0	0	0	2	2	2	0	2	2	2	2	0	0	2	2	0	0	2	0	2	2	0	0	0	-1	2	0	0	0
Tdurum_contig75336_402	0	2	2	0	2	2	0	2	2	2	2	2	0	2	0	0	0	0	2	0	0	0	0	2	2	2	0	2	2	-1	2	0	0	2	2	0	0	2	0	2	2	0	0	0	-1	2	0	0	0
Tdurum_contig75336_518	0	2	2	0	2	2	0	2	2	2	2	2	0	2	0	0	0	0	2	0	0	0	0	2	2	2	0	2	2	-1	2	0	0	2	2	0	0	2	0	2	2	0	0	0	-1	2	0	0	0
Tdurum_contig8674_1236	0	2	2	0	2	2	0	2	2	2	2	2	0	2	0	0	0	0	2	0	0	0	0	2	2	2	0	2	2	2	2	0	0	2	2	0	0	2	0	2	2	0	0	0	-1	2	0	0	0
Tdurum_contig75812_438	0	2	2	0	2	2	0	2	2	2	2	2	0	2	0	0	0	0	2	0	0	0	0	2	2	2	0	2	2	2	2	0	0	2	2	0	0	2	0	2	2	0	0	0	-1	2	0	0	0
RAC875_c38975_411	0	2	2	0	2	2	0	2	2	2	2	2	0	2	0	0	0	0	2	0	0	0	0	2	2	2	0	2	2	2	2	0	0	2	2	0	0	2	0	2	2	0	0	0	-1	2	0	0	0
Tdurum_contig10022_564	0	2	2	0	2	2	0	2	2	2	2	2	0	2	0	0	0	0	2	0	0	0	0	2	2	2	0	2	2	2	2	0	0	2	2	0	0	2	0	2	2	0	0	0	0	2	0	0	0
Excalibur_c6906_1167	0	2	2	0	2	2	0	2	2	2	2	2	0	2	0	0	0	0	2	0	0	0	0	2	2	2	0	2	2	2	2	0	0	2	2	0	0	2	0	2	2	0	0	0	0	2	0	0	0
GENE-1464_73	0	2	2	0	2	2	0	2	-1	2	2	2	0	-1	0	0	0	0	2	0	0	0	0	2	2	2	0	2	2	2	2	0	0	2	2	0	0	2	0	2	2	0	0	0	-1	2	0	0	0
wsnp_BM137927A_Ta_2_1	0	2	2	0	2	2	0	2	-1	2	2	2	0	-1	0	0	0	0	2	0	0	0	0	2	2	2	0	2	2	2	2	0	0	2	2	0	0	2	0	2	2	0	0	0	-1	2	0	0	0
Ex_c35861_1382	0	2	0	2	2	2	0	0	2	2	2	0	0	-1	2	2	2	0	0	0	0	0	0	2	2	0	2	2	2	0	2	0	0	0	2	0	0	0	0	0	2	0	0	0	0	2	2	0	0
Excalibur_rep_c109598_66	0	2	0	-1	2	2	0	0	2	2	2	0	0	2	2	2	2	0	0	0	0	0	0	2	2	0	2	2	2	0	2	0	0	0	2	0	0	0	0	0	2	0	0	0	0	2	2	0	0
Kukri_c27572_1338	0	2	0	2	2	2	0	0	2	2	2	0	0	2	2	2	2	0	0	0	0	0	0	2	2	0	2	2	2	0	2	0	0	0	2	0	0	0	0	0	2	0	0	0	0	2	2	0	0
RAC875_c56612_1076	0	2	0	-1	2	2	0	0	2	2	2	0	0	2	2	2	2	0	0	0	0	0	0	2	2	0	2	2	2	0	2	0	0	0	2	0	0	0	0	0	2	0	0	0	0	2	2	0	0
wsnp_Ex_c35861_43927741	0	2	0	2	2	2	0	0	2	2	2	0	0	2	2	2	2	0	0	0	0	0	0	2	2	0	2	2	2	0	2	0	0	0	2	0	0	0	0	0	2	0	0	0	0	2	2	0	0
BobWhite_c8674_595	0	2	0	2	2	2	0	0	2	2	2	0	0	2	2	2	2	0	0	0	0	0	0	2	2	0	2	2	2	0	2	0	0	0	2	0	0	0	0	0	2	0	0	0	0	2	2	0	0
Excalibur_c28180_367	0	2	0	2	2	2	0	0	2	2	2	0	0	-1	2	2	2	0	0	0	0	0	0	2	2	0	2	2	2	0	2	0	0	0	2	0	0	0	0	0	2	0	0	0	0	2	2	0	0
Excalibur_c35861_106	0	2	0	2	2	2	0	0	2	2	2	0	0	2	2	2	2	0	0	0	0	0	0	2	2	0	2	2	2	0	2	0	0	0	2	0	0	0	0	0	2	0	0	0	0	2	2	0	0
RAC875_c14370_1319	0	2	0	2	2	2	0	0	2	2	2	0	0	-1	2	2	2	0	0	0	0	0	0	2	2	0	2	2	2	0	2	0	0	0	2	0	0	0	0	0	2	0	0	0	0	2	2	0	0
Tdurum_contig55560_972	0	-1	0	2	2	2	0	0	2	2	2	0	0	-1	2	2	2	0	0	0	0	0	0	2	2	0	2	2	2	0	2	0	0	0	2	0	0	0	0	0	2	0	0	0	0	2	2	0	0
Tdurum_contig97800_262	0	2	0	2	2	2	0	0	2	2	2	0	0	-1	2	2	2	0	0	0	0	0	0	2	2	0	2	2	2	0	2	0	0	0	2	0	0	0	0	0	2	0	0	0	0	2	2	0	0
wsnp_Ex_c35861_43926307	0	2	0	2	2	2	0	0	2	2	2	0	0	2	2	2	2	0	0	0	0	0	0	2	2	0	2	2	2	0	2	0	0	0	2	0	0	0	0	0	2	0	0	0	0	2	2	0	0
wsnp_Ex_rep_c104327_89077792	0	2	0	2	2	2	0	0	2	2	2	0	0	2	2	2	2	0	0	0	0	0	0	2	2	0	2	2	2	0	2	0	0	0	2	0	0	0	0	0	2	0	0	0	0	2	2	0	0
wsnp_Ex_rep_c69342_68276235	0	-1	0	2	2	2	0	0	2	2	2	0	0	-1	2	2	2	0	0	0	0	0	0	2	2	0	2	2	2	0	2	0	0	0	2	0	0	0	0	0	2	0	0	0	0	2	2	0	0
wsnp_Ex_rep_c69342_68276256	0	2	0	2	2	2	0	0	2	2	2	0	0	2	2	2	2	0	0	0	0	0	0	2	2	0	2	2	2	0	2	0	0	0	2	0	0	0	0	0	2	0	0	0	0	2	2	0	0
wsnp_Ex_rep_c69919_68881108	0	2	0	2	2	2	0	0	2	2	2	0	0	2	2	2	2	0	0	0	0	0	0	2	2	0	2	2	2	0	2	0	0	0	2	0	0	0	0	0	2	0	0	0	0	2	2	0	0
Tdurum_contig42150_3190	0	2	0	2	2	2	0	0	2	2	2	0	0	2	2	2	2	0	0	0	0	0	0	2	2	0	2	2	2	0	2	0	0	0	2	0	0	0	0	0	2	0	0	0	0	2	2	0	0
Tdurum_contig42150_3198	0	2	0	2	2	2	0	0	2	2	2	0	0	-1	2	2	2	0	0	0	0	0	0	2	2	0	2	2	2	0	2	0	0	0	2	0	0	0	0	0	2	0	0	0	0	2	2	0	0
Tdurum_contig42150_3348	0	2	0	2	2	2	0	0	-1	2	2	0	0	-1	2	2	2	0	0	0	0	0	0	2	2	0	2	2	2	0	2	0	0	0	2	0	0	0	0	0	2	0	0	0	0	2	2	0	0
Tdurum_contig42150_3417	0	2	0	2	2	2	0	0	2	2	2	0	0	-1	2	2	2	0	0	0	0	0	0	2	2	0	2	2	2	-1	2	0	0	0	2	0	0	0	0	0	2	0	0	0	0	2	2	0	0
Tdurum_contig42150_3440	0	2	0	2	2	2	0	0	2	2	2	0	0	-1	2	2	2	0	0	0	0	0	0	2	2	0	2	2	2	-1	2	0	0	0	2	0	0	0	0	0	2	0	0	0	0	2	2	0	0
CAP7_rep_c12940_130	0	2	0	2	2	2	0	0	2	2	2	0	0	2	2	2	2	0	0	0	0	0	0	2	2	0	0	2	2	0	2	0	0	0	2	0	0	0	0	0	2	0	0	0	0	2	2	0	0
BobWhite_c71_391	0	2	0	2	2	2	0	0	2	2	2	0	0	2	2	2	2	0	0	0	0	0	0	2	2	0	0	2	2	0	2	0	0	0	2	0	2	0	0	0	2	0	0	0	0	2	2	0	0
Excalibur_c39002_242	0	2	0	2	2	2	0	0	2	2	2	0	0	2	2	2	2	0	0	0	0	0	0	2	2	0	0	2	2	0	2	0	0	0	2	0	2	0	0	0	2	0	0	0	0	2	2	0	0
wsnp_BF292596A_Ta_1_3	0	2	0	2	2	2	0	0	2	2	2	0	0	-1	2	2	2	0	0	0	0	0	0	2	2	0	0	2	2	0	2	0	0	0	2	0	2	0	0	0	2	0	0	0	0	2	2	0	0
wsnp_BF292596A_Ta_1_1	0	2	0	2	2	2	0	0	2	2	2	0	0	2	2	2	2	0	0	0	0	0	0	2	2	0	0	2	2	0	2	0	0	0	2	0	2	0	0	0	2	0	0	0	0	2	2	0	0
GENE-1642_397	0	2	0	2	2	2	0	0	2	2	2	0	0	2	2	2	2	0	0	0	0	0	0	2	2	0	0	2	2	0	2	0	0	0	2	0	2	0	0	0	2	0	0	0	0	2	2	0	0
Excalibur_c24402_471	0	-1	0	2	2	2	0	0	-1	2	2	0	0	-1	2	2	2	0	0	0	0	0	0	2	2	0	0	2	2	0	2	0	0	0	2	0	2	0	0	0	2	0	0	0	0	2	2	0	0
Excalibur_c46600_919	0	2	0	2	2	2	0	0	2	2	2	0	0	2	2	2	2	0	0	0	0	0	0	2	2	0	0	2	2	0	2	0	0	0	2	0	2	0	0	0	2	0	0	0	0	2	2	0	0
IACX6054	0	2	0	2	2	2	0	0	2	2	2	0	0	-1	2	2	2	0	0	0	0	0	0	2	2	0	0	2	2	0	2	0	0	0	2	0	0	0	0	0	2	0	0	0	0	2	2	0	0
Kukri_c55381_67	0	2	0	2	2	2	0	0	-1	2	2	0	0	-1	2	2	2	0	0	0	0	0	0	2	2	0	0	2	2	0	2	0	0	0	2	0	0	0	0	0	2	0	0	0	0	2	2	0	0
Tdurum_contig29045_84	0	2	0	2	2	2	0	0	2	2	-1	0	0	-1	2	2	2	0	0	0	0	0	0	2	2	0	0	2	2	0	2	0	0	0	2	0	0	0	0	0	2	0	0	0	0	2	2	0	0
wsnp_Ku_c458_954940	0	2	0	2	2	2	0	0	-1	2	2	0	0	-1	2	2	2	0	0	0	0	0	0	2	2	0	0	2	2	0	2	0	0	0	2	0	0	0	0	0	2	0	0	0	0	2	2	0	0
Kukri_c10210_1387	0	2	0	2	2	2	0	0	-1	2	2	0	0	-1	2	2	2	0	0	0	0	0	0	2	2	0	0	2	2	0	2	0	0	0	2	0	0	0	0	0	2	0	0	0	0	2	2	0	0
Kukri_c1308_2782	0	-1	0	2	2	2	0	0	2	2	2	0	0	-1	2	2	2	0	0	0	0	0	0	0	2	0	0	2	2	0	2	0	0	0	2	0	0	0	0	0	2	0	0	0	0	2	2	0	0
Excalibur_c41857_814	0	2	0	2	2	2	0	0	2	2	2	0	0	-1	2	2	2	0	0	0	0	0	0	0	2	0	0	2	2	0	2	0	0	0	2	0	0	0	0	0	2	0	0	0	0	2	2	0	0
Kukri_c1308_2236	0	2	0	2	2	2	0	0	2	2	2	0	0	-1	2	2	2	0	0	0	0	0	0	0	2	0	0	2	2	0	2	0	0	0	2	0	0	0	0	0	2	0	0	0	0	2	2	0	0
Kukri_rep_c69970_717	0	2	0	2	2	2	0	0	2	2	2	0	0	2	2	2	2	0	0	0	0	0	0	0	2	0	0	2	2	0	2	0	0	0	2	0	0	0	0	0	2	0	0	0	0	2	2	0	0
RAC875_c31572_251	0	-1	0	2	2	2	0	0	2	2	2	0	0	-1	2	2	2	0	0	0	0	0	0	0	2	0	0	2	2	0	2	0	0	0	2	0	0	0	0	0	2	0	0	0	0	2	2	0	0
RAC875_c31572_281	0	-1	0	2	2	2	0	0	2	2	2	0	0	-1	2	2	2	0	0	0	0	0	0	0	2	0	0	2	2	0	2	0	0	0	2	0	0	0	0	0	2	0	0	0	0	2	2	0	0
RFL_Contig2787_634	0	0	0	2	0	2	0	0	2	2	2	0	0	-1	2	2	2	0	0	2	0	0	0	0	2	0	0	2	2	0	2	0	0	0	2	0	0	0	0	0	2	0	0	0	0	2	2	0	0
BS00006822_51	0	0	0	2	0	2	0	0	2	2	2	0	0	2	2	2	0	0	0	2	0	0	0	0	2	0	0	2	2	0	2	0	0	0	2	0	0	0	0	0	2	0	0	0	0	2	2	0	0
Kukri_c63259_151	0	0	0	2	0	2	0	0	2	2	2	0	0	-1	2	2	0	0	0	2	0	0	0	0	2	0	0	2	2	0	2	0	0	0	2	0	0	0	0	0	2	0	0	0	0	2	2	0	0
RAC875_c79551_167	0	0	0	2	0	2	0	0	2	2	2	0	0	2	2	2	0	0	0	2	0	0	0	0	2	0	0	2	2	0	2	0	0	0	2	0	0	0	0	0	2	0	0	0	0	2	2	0	0
TA002702-0616	0	0	0	2	0	2	0	0	2	2	2	0	0	-1	2	2	0	0	0	2	0	0	0	0	2	0	0	2	2	0	2	0	0	0	2	0	0	0	0	0	2	0	0	0	0	2	2	0	0
BS00068094_51	0	0	0	2	0	2	0	0	2	2	2	0	0	-1	2	2	0	0	0	2	0	0	0	0	2	0	0	2	2	0	2	0	0	0	2	0	0	0	0	0	2	0	0	0	0	2	2	0	0
BS00091002_51	0	0	0	2	0	2	0	0	2	2	2	0	0	-1	2	2	0	0	0	2	0	0	0	0	2	0	0	2	2	0	2	0	0	0	2	0	0	0	0	0	2	0	0	0	0	2	2	0	0
Kukri_c31546_66	0	0	0	2	0	2	0	0	2	2	2	0	0	-1	2	2	0	0	0	2	0	0	0	0	2	0	0	2	2	0	2	0	0	0	2	0	0	0	0	0	2	0	0	0	0	2	2	0	0
RFL_Contig497_1114	0	0	0	2	0	2	0	0	2	2	2	0	0	-1	2	2	0	0	0	2	0	0	0	0	2	0	0	2	2	0	2	0	0	0	2	0	0	0	0	0	2	0	0	0	0	2	2	0	0
BS00022058_51	0	0	0	2	0	2	0	0	2	2	2	0	2	-1	-1	2	0	0	0	2	0	0	0	0	2	0	0	2	2	0	2	0	0	0	2	0	0	0	0	0	2	0	0	0	0	2	2	0	0
Excalibur_c39808_453	0	0	0	2	0	2	0	0	2	0	0	0	0	2	2	2	0	0	0	2	0	0	0	0	2	0	2	2	2	2	2	0	0	0	2	0	0	0	0	0	2	0	0	0	0	2	2	0	0
Kukri_c17966_561	0	0	0	2	0	2	0	0	2	0	0	0	0	2	2	2	0	0	0	2	0	0	0	0	2	0	2	2	2	2	2	0	0	0	2	0	0	0	0	0	2	0	0	0	0	2	2	0	0
RAC875_c10194_910	0	0	0	2	0	2	0	0	2	0	0	0	0	2	2	2	0	0	0	2	0	0	0	0	2	0	2	2	2	2	2	0	0	0	2	0	0	0	0	0	2	0	0	0	0	2	2	0	0
RAC875_c15003_377	0	0	0	2	0	2	0	0	2	0	0	0	0	2	2	2	0	0	0	2	0	0	0	0	2	0	2	2	2	2	2	0	0	0	2	0	0	0	0	0	2	0	0	0	0	2	2	0	0
wsnp_Ex_c27317_36522052	0	0	0	2	0	2	0	0	2	0	0	0	0	2	2	2	0	0	0	2	0	0	0	0	2	0	2	2	2	2	2	0	0	0	2	0	0	0	0	0	2	0	0	0	0	2	2	0	0
BS00023337_51	0	0	0	2	0	2	0	0	-1	0	0	0	0	-1	-1	2	0	0	0	2	0	0	0	0	2	0	2	2	2	2	2	0	0	0	2	0	0	0	0	0	2	0	0	0	0	2	2	0	0
Ra_c23771_496	0	0	0	2	0	2	0	0	-1	0	0	0	0	-1	-1	2	0	0	0	2	0	0	0	0	2	0	2	2	2	2	2	0	0	0	2	0	0	0	0	0	2	0	0	0	0	2	2	0	0
IAAV1410	0	0	0	2	0	2	0	0	2	0	0	0	0	-1	-1	2	0	0	0	2	0	0	0	0	2	0	2	2	2	2	2	0	0	0	2	0	0	0	0	0	2	0	0	0	0	2	2	0	0
IAAV5370	0	0	0	2	0	2	0	0	2	0	0	0	0	-1	-1	2	0	0	0	2	0	0	0	0	2	0	2	2	2	2	2	0	0	0	2	0	0	0	0	0	2	0	0	0	0	2	2	0	0
Kukri_c12079_204	0	0	0	2	0	2	0	0	2	0	0	0	0	-1	-1	2	0	0	0	2	0	0	0	0	2	0	2	2	2	2	2	0	0	0	2	0	0	0	0	0	2	0	0	0	0	2	2	0	0
Kukri_c8465_54	0	0	0	2	0	2	0	0	2	0	0	0	0	-1	-1	2	0	0	0	2	0	0	0	0	2	0	2	2	2	2	2	0	0	0	2	0	0	0	0	0	2	0	0	0	0	2	2	0	0
RAC875_c10194_673	0	0	0	2	0	2	0	0	2	0	0	0	0	-1	2	2	0	0	0	2	0	0	0	0	2	0	2	2	2	2	2	0	0	0	2	0	0	0	0	0	2	0	0	0	0	2	2	0	0
wsnp_CAP11_rep_c4226_1995152	0	0	0	2	0	2	0	0	-1	0	0	0	0	-1	-1	2	0	0	0	2	0	0	0	0	2	0	2	2	2	2	2	0	0	0	2	0	0	0	0	0	2	0	0	0	0	2	2	0	0
wsnp_Ex_c12341_19693090	0	0	0	2	0	2	0	0	2	0	0	0	0	-1	2	2	0	0	0	2	0	0	0	0	2	0	2	2	2	2	2	0	0	0	2	0	0	0	0	0	2	0	0	0	0	2	2	0	0
wsnp_Ex_c1894_3575749	0	0	0	2	0	2	0	0	-1	0	0	0	0	-1	-1	2	0	0	0	2	0	0	0	0	2	0	2	2	2	2	2	0	0	0	2	0	0	0	0	0	2	0	0	0	0	2	2	0	0
BS00081610_51	0	0	0	2	0	2	0	0	-1	0	0	0	0	-1	-1	2	0	0	0	2	0	0	0	0	2	0	2	2	2	2	2	0	0	0	2	0	0	0	0	0	2	0	0	0	0	2	2	0	0
Excalibur_c29600_173	0	0	0	2	0	2	0	0	2	0	0	0	0	0	-1	2	0	0	0	2	0	0	0	0	2	0	2	2	2	2	2	0	0	0	2	0	0	0	0	0	2	0	0	0	0	2	2	0	0
BobWhite_c38444_238	0	0	0	2	0	2	0	0	2	0	0	0	0	-1	-1	2	0	0	0	2	0	0	0	0	2	0	2	2	2	2	2	0	0	0	2	0	0	0	0	0	2	0	0	0	0	2	2	0	0
RAC875_c15109_106	0	0	-1	2	0	2	0	0	2	0	0	2	0	0	-1	0	0	0	0	2	0	0	0	0	2	0	2	2	2	2	2	0	0	0	2	0	0	0	0	0	2	0	0	-1	2	2	2	0	2
BS00064472_51	0	0	-1	2	0	2	0	0	2	0	0	2	0	-1	-1	0	0	0	0	2	0	0	0	0	2	0	2	2	2	2	2	0	0	0	2	0	0	0	0	0	2	0	0	0	2	2	2	0	2
Excalibur_c49743_97	0	0	-1	2	0	2	0	0	2	0	0	2	0	-1	0	0	0	0	0	2	0	0	0	0	2	0	2	2	2	2	2	0	0	0	2	0	0	0	0	0	2	0	0	-1	2	2	2	0	2
Excalibur_rep_c110501_525	0	0	-1	2	0	2	0	0	2	0	0	2	0	-1	0	0	0	0	0	2	0	0	0	0	2	0	2	2	2	2	2	0	0	0	2	0	0	0	0	0	2	0	0	-1	2	2	2	0	2
GENE-0477_241	0	0	-1	2	0	2	0	0	2	0	0	2	0	0	0	0	0	0	0	2	0	0	0	0	2	0	2	2	2	2	2	0	0	0	2	0	0	0	0	0	2	0	0	0	2	2	2	0	2
RFL_Contig4282_1420	0	0	-1	2	0	2	0	0	2	0	0	2	0	0	-1	0	0	0	0	2	0	0	0	0	2	0	2	2	2	2	2	0	0	0	2	0	0	0	0	0	2	0	0	-1	2	2	2	0	2
wsnp_BG262734A_Ta_2_3	0	0	-1	2	0	2	0	0	2	0	0	2	0	0	-1	0	0	0	0	2	0	0	0	0	2	0	2	2	2	2	2	0	0	0	2	0	0	0	0	0	2	0	0	-1	2	2	2	0	2
wsnp_BG262734A_Ta_2_7	0	0	-1	2	0	2	0	0	2	0	0	2	0	0	-1	0	0	0	0	2	0	0	0	0	2	0	2	2	2	2	2	0	0	0	2	0	0	0	0	0	2	0	0	-1	2	2	2	0	2
wsnp_CAP11_c68_106078	0	0	0	2	0	2	0	0	2	0	0	2	0	0	-1	0	0	0	0	2	0	0	0	0	2	0	2	2	2	2	2	0	0	0	2	0	0	0	0	0	2	0	0	-1	2	2	2	0	2
wsnp_CAP12_c15_9559	0	0	-1	2	0	2	0	0	2	0	0	2	0	0	-1	0	0	0	0	2	0	0	0	0	2	0	2	2	2	2	2	0	0	0	2	0	0	0	0	0	2	0	0	-1	2	2	2	0	2
Kukri_c10751_1031	0	0	-1	2	0	2	0	0	2	0	0	2	0	-1	-1	0	0	0	0	2	0	0	0	2	2	0	2	2	2	2	2	0	0	0	2	0	0	0	0	0	2	0	0	-1	2	2	2	0	2
wsnp_Ex_c15475_23756906	0	0	-1	2	0	2	0	0	2	0	0	2	0	-1	-1	0	0	0	0	2	0	0	0	2	2	0	2	2	2	2	2	0	0	0	2	0	0	0	0	0	2	0	0	-1	2	2	2	0	2
BS00020459_51	0	0	0	2	0	2	0	0	2	0	0	2	0	-1	-1	0	0	0	0	2	0	0	0	2	2	0	2	2	2	2	2	0	0	0	2	0	0	0	0	0	2	0	0	-1	2	2	2	0	2
BS00049977_51	0	0	-1	2	0	2	0	0	2	0	0	2	0	-1	-1	0	0	0	0	2	0	0	0	2	2	0	2	2	2	2	2	0	0	0	2	0	0	0	0	0	2	0	0	-1	2	2	2	0	2
IAAV7454	0	0	-1	2	0	2	0	0	2	0	0	2	0	-1	-1	0	0	0	0	2	0	0	0	2	2	0	2	2	2	2	2	0	0	0	2	0	0	0	0	0	2	0	0	0	2	2	2	0	2
Kukri_c10751_158	0	0	-1	2	0	2	0	0	2	0	0	2	0	-1	-1	0	0	0	0	2	0	0	0	2	2	0	2	2	2	2	2	0	0	0	2	0	0	0	0	0	2	0	0	-1	2	2	2	0	2
wsnp_Ex_c15475_23757972	0	0	-1	2	0	2	0	0	2	0	0	2	0	-1	-1	0	0	0	0	2	0	0	0	2	2	0	2	2	2	2	2	0	0	0	2	0	0	0	0	0	2	0	0	-1	2	2	2	0	2
Kukri_c10751_264	0	0	0	2	0	2	0	0	2	0	0	2	0	0	-1	0	0	0	0	2	0	0	0	2	2	0	2	2	2	2	2	0	0	0	2	0	0	0	0	0	2	0	0	0	2	2	2	0	2
Kukri_c10751_860	0	0	0	2	0	2	0	0	2	0	0	2	0	-1	0	0	0	0	0	2	0	0	0	2	2	0	2	2	2	2	2	0	0	0	2	0	0	0	0	0	2	0	0	0	2	2	2	0	2
wsnp_Ex_c1533_2930233	0	0	0	2	0	2	0	0	2	0	0	2	0	-1	-1	0	0	0	0	2	0	0	0	2	2	0	2	0	2	2	2	0	0	0	2	0	0	0	0	0	0	0	0	0	2	2	2	0	2
RAC875_rep_c90531_283	0	0	2	2	0	2	0	0	2	0	0	2	0	2	-1	0	0	0	0	2	0	0	0	2	2	0	2	0	2	2	2	0	0	0	2	0	0	0	0	0	0	0	0	2	2	2	2	0	2
BS00067940_51	0	0	-1	2	2	2	0	0	2	0	0	2	0	2	2	0	0	0	0	2	0	0	0	2	2	0	2	0	0	2	2	0	0	0	2	0	0	0	0	0	0	0	0	0	2	2	2	0	0
BobWhite_c62252_472	0	0	-1	2	2	2	0	0	-1	0	0	2	0	-1	-1	0	0	0	0	2	0	0	0	2	2	0	2	0	0	2	2	0	0	0	2	0	0	0	0	0	0	0	0	-1	2	2	2	0	0
IAAV2216	2	0	0	0	2	2	2	0	2	2	2	0	0	-1	0	0	0	2	2	0	0	0	0	2	0	0	2	0	2	0	0	0	0	0	2	2	2	0	2	0	0	0	-1	-1	0	0	2	0	0
BS00069271_51	2	0	0	0	2	2	2	0	2	0	2	0	0	2	0	0	0	2	2	0	0	0	0	2	0	0	2	0	2	0	0	0	0	0	2	2	2	0	2	0	0	0	2	2	0	0	2	0	0
BS00035307_51	2	0	0	0	2	2	2	0	2	0	2	0	2	-1	0	0	0	2	2	0	0	0	0	2	0	0	2	0	2	0	0	0	0	0	2	2	0	0	2	0	0	0	-1	-1	0	0	2	0	0
RAC875_c16277_737	2	0	0	0	0	2	2	0	2	0	2	0	0	2	0	0	0	-1	2	0	0	0	0	2	0	2	2	0	2	2	0	2	0	0	2	2	0	2	2	0	0	0	-1	2	0	0	2	2	0
Excalibur_c12032_1101	2	0	0	0	0	2	2	0	2	0	2	0	0	2	0	0	0	2	2	0	0	0	0	2	0	2	2	0	2	2	0	2	0	0	2	2	0	2	2	0	0	0	-1	2	0	0	2	2	0
Tdurum_contig59603_74	2	0	0	0	0	2	2	0	-1	0	2	0	0	2	0	0	0	2	2	0	0	0	0	2	0	2	2	0	2	2	0	2	0	0	2	2	0	2	2	0	0	0	-1	-1	0	0	2	2	0
Tdurum_contig59603_94	2	0	0	0	0	2	2	0	2	0	2	0	0	2	0	0	0	2	2	0	0	0	0	2	0	2	2	0	2	2	0	2	0	0	2	2	0	2	2	0	0	0	-1	-1	0	0	2	2	0
Kukri_c2963_272	2	0	0	0	0	2	2	0	2	0	2	0	0	2	0	0	0	2	2	0	0	0	0	2	0	2	2	0	2	2	0	2	0	0	2	2	0	2	2	0	0	0	-1	2	0	0	2	2	0
Ex_c7626_444	2	0	0	0	0	2	2	2	2	0	2	0	0	-1	2	0	2	2	0	0	0	0	2	2	0	2	2	0	2	0	0	2	2	2	2	2	0	2	0	0	0	0	0	-1	0	0	2	2	0
Ku_c7594_1179	2	0	0	0	0	2	2	2	2	0	2	0	0	-1	-1	0	2	2	0	0	0	0	2	2	0	2	2	0	2	0	0	2	2	2	2	2	0	2	0	0	0	0	0	-1	0	0	2	2	0
Ra_c74035_586	2	0	0	0	0	2	2	2	2	0	2	0	0	-1	-1	0	2	2	0	0	0	0	2	2	0	2	2	0	2	0	0	2	2	2	2	2	0	2	0	0	0	0	0	-1	0	0	2	2	0
wsnp_Ex_c22913_32130617	2	0	0	2	0	2	2	2	2	0	2	2	0	2	0	0	2	2	0	0	0	0	2	2	0	2	2	0	2	0	0	2	2	2	2	2	0	2	0	0	0	0	0	2	0	0	0	2	0
CAP12_c2677_138	2	0	0	2	0	2	2	2	-1	0	2	2	0	-1	0	0	2	2	0	0	0	0	2	0	0	2	2	0	2	2	0	2	2	2	2	2	0	2	0	0	0	0	0	2	0	0	0	2	0
RAC875_c58868_397	2	0	0	2	0	2	2	2	0	0	2	2	0	-1	0	0	2	2	0	0	0	0	2	0	0	2	2	0	2	2	0	2	2	2	2	2	0	2	0	0	0	0	0	-1	0	0	0	2	0
RAC875_c32657_295	2	0	0	2	0	2	2	2	0	0	2	2	0	0	0	0	0	2	0	0	0	0	2	0	0	2	2	0	2	2	0	2	2	2	2	2	0	2	0	0	0	0	0	-1	0	0	0	2	0
Jagger_c10704_106	2	0	0	2	0	2	2	2	0	0	2	2	0	0	0	0	0	0	0	0	0	0	2	0	0	2	2	0	2	0	0	2	2	2	2	2	0	2	0	0	0	0	0	-1	0	0	0	2	0
RAC875_c1606_644	2	0	0	2	0	2	2	2	0	0	2	2	0	-1	0	0	0	0	0	0	0	0	2	0	0	2	2	0	2	2	0	2	2	2	2	2	0	2	0	0	0	0	0	-1	0	0	0	2	0
Excalibur_c30624_304	2	0	0	2	0	2	2	2	0	0	2	2	0	-1	0	0	0	0	0	0	0	0	2	0	0	2	2	0	2	2	0	2	2	2	2	2	0	2	0	0	0	0	0	2	0	0	0	2	0
Ku_c3891_395	2	0	0	2	0	2	2	2	0	0	2	2	0	0	0	0	0	0	0	0	0	0	2	0	0	2	2	0	2	2	0	2	2	2	2	2	0	2	0	0	0	0	0	2	0	0	0	2	0
Ku_c766_2292	2	0	0	2	0	2	2	2	0	0	2	2	0	0	0	0	0	0	0	0	0	0	2	0	0	2	2	0	2	2	0	2	2	2	2	2	0	2	0	0	0	0	0	-1	0	0	0	2	0
Kukri_c62796_500	2	0	0	2	0	2	2	2	0	0	2	2	0	-1	0	0	0	0	0	0	0	0	2	0	0	2	2	0	2	2	0	2	2	2	2	2	0	2	0	0	0	0	0	-1	0	0	0	2	0
RAC875_c28178_889	2	0	0	2	0	2	2	2	0	0	2	2	0	0	0	0	0	0	0	0	0	0	2	0	0	2	2	0	2	2	0	2	2	2	2	2	0	2	0	0	0	0	0	2	0	0	0	2	0
wsnp_Ku_rep_c102527_89481571	2	0	0	2	0	2	2	2	-1	0	2	2	0	-1	0	0	0	0	0	0	0	0	2	0	0	2	2	0	2	2	0	2	2	2	2	2	0	2	0	0	0	0	0	-1	0	0	0	2	0
BS00011060_51	2	0	0	-1	0	2	0	2	0	0	0	2	0	-1	0	0	0	0	0	0	2	2	2	2	0	2	2	0	2	2	0	2	2	2	2	2	0	2	0	0	0	0	0	2	2	0	0	2	0
Kukri_c22231_87	2	0	0	-1	0	2	0	2	0	0	0	2	0	-1	0	0	0	0	0	0	2	2	2	2	0	2	2	0	2	2	0	2	2	2	2	2	0	2	0	0	0	0	0	2	2	0	0	2	0
wsnp_Ex_c54453_57331510	2	0	0	0	0	2	0	2	0	0	0	2	0	0	0	0	0	0	0	0	2	2	2	2	0	2	2	0	2	2	0	2	2	2	2	2	0	2	0	0	0	0	0	2	2	0	0	2	0
wsnp_Ex_c20386_29451037	2	0	0	0	0	2	0	2	0	0	0	2	0	0	0	0	0	0	0	0	2	2	2	2	0	2	2	0	2	2	0	2	2	2	2	2	0	2	0	0	0	0	0	2	2	0	0	2	0
RAC875_c754_120	2	0	0	-1	0	2	0	2	0	0	0	2	0	-1	0	0	0	0	0	0	2	2	2	2	0	2	2	0	2	2	0	2	2	2	2	2	0	2	0	0	0	0	0	2	2	0	0	2	0
wsnp_Ex_c5690_9994305	2	0	0	0	0	2	0	2	0	0	0	2	0	-1	0	0	0	0	0	0	2	2	2	2	0	2	0	0	2	2	0	2	2	2	0	2	0	2	2	0	0	0	0	2	2	0	0	2	0
wsnp_Ex_c5690_9994334	2	0	0	0	0	2	0	2	0	0	0	2	0	0	0	0	0	0	0	0	2	2	2	2	0	2	0	0	2	2	0	2	2	2	0	2	0	2	2	0	0	0	0	2	2	0	0	2	0
Kukri_c4559_278	2	0	0	-1	0	2	0	2	0	0	0	2	0	0	0	0	2	0	0	0	2	2	2	2	0	2	0	0	2	0	0	2	2	2	0	2	0	2	2	0	0	0	0	2	2	0	0	2	0
wsnp_Ex_c36701_44603531	2	0	0	-1	0	2	0	2	0	0	0	2	0	0	0	0	2	0	0	0	2	2	2	2	0	2	0	0	2	0	0	2	2	2	0	2	0	2	2	0	0	0	0	2	2	0	0	2	0
Ra_c7973_1185	2	0	0	2	0	2	0	2	0	0	0	2	0	0	0	0	2	0	0	0	2	2	2	2	0	2	0	0	2	0	0	2	2	2	0	2	0	2	2	0	0	0	0	0	2	0	0	2	0
wsnp_Ra_c10536_17322563	2	0	0	2	0	2	0	2	0	0	0	2	0	0	0	0	2	0	0	0	2	2	2	2	0	2	0	0	2	0	0	2	2	2	0	2	0	2	2	0	0	0	0	0	2	0	0	2	0
Kukri_c6199_1183	2	0	0	-1	0	2	0	2	0	0	0	2	0	0	0	0	2	0	0	0	2	2	2	2	0	2	0	0	2	0	0	2	2	2	0	2	0	2	2	0	0	0	0	0	2	0	0	2	0
Tdurum_contig13140_69	2	0	0	-1	0	2	0	2	0	0	0	2	0	0	0	0	2	0	0	0	2	2	2	2	0	2	0	0	2	0	0	2	2	2	0	2	0	2	2	0	0	0	0	0	2	0	0	2	0
wsnp_Ku_rep_c76865_75281903	2	0	0	-1	0	2	0	2	0	0	0	2	0	0	0	0	2	0	0	0	2	2	2	2	0	2	0	0	2	0	0	2	2	2	0	2	0	2	2	0	0	0	0	0	2	0	0	2	0
RAC875_c31051_490	2	0	0	2	0	2	0	2	0	0	0	2	0	0	0	0	2	0	0	0	2	2	2	2	0	2	0	0	2	0	0	2	2	2	0	2	0	2	2	0	0	0	0	0	2	0	0	2	0
Ex_c40210_281	2	0	0	0	0	2	0	2	0	0	0	2	0	-1	0	0	2	0	0	0	2	2	0	2	0	2	0	0	2	0	0	2	2	0	0	2	0	2	2	0	0	0	0	-1	2	0	0	2	0
Kukri_c46421_168	2	0	0	0	0	2	0	2	-1	0	0	2	0	-1	0	0	2	0	0	0	2	2	0	2	0	2	0	0	2	0	0	2	2	0	0	2	0	2	2	0	0	0	0	-1	2	0	0	2	0
Tdurum_contig34920_104	2	0	0	0	0	2	0	2	0	0	0	2	0	0	0	0	2	0	0	0	2	2	0	2	0	2	0	0	2	0	0	2	2	0	0	2	0	2	2	0	0	0	0	0	2	0	0	2	0
BobWhite_c17999_112	2	0	0	0	0	2	0	2	0	0	0	2	0	0	0	0	2	0	0	0	2	2	0	2	0	2	0	0	2	0	0	2	2	0	0	2	0	2	2	0	0	0	0	0	2	0	0	2	0
Excalibur_c4283_201	2	0	0	0	0	2	0	2	0	0	0	2	0	-1	0	0	2	0	0	0	2	2	0	2	0	2	0	0	2	0	0	2	2	0	0	2	0	2	2	0	0	0	0	-1	2	0	0	2	0
GENE-2637_396	2	0	0	0	0	2	0	2	0	0	0	2	0	0	0	0	2	0	0	0	2	2	0	2	0	2	0	0	2	0	0	2	2	0	0	2	0	2	2	0	0	0	0	0	2	0	0	2	0
GENE-2637_94	2	0	0	0	0	2	0	2	0	0	0	2	0	0	0	0	2	0	0	0	2	2	0	2	0	2	0	0	2	0	0	2	2	0	0	2	0	2	2	0	0	0	0	0	2	0	0	2	0
RAC875_rep_c73827_306	2	0	0	0	0	2	0	2	0	0	0	2	0	0	0	0	2	0	0	0	2	2	0	2	0	2	0	0	2	0	0	2	2	0	0	2	0	2	2	0	0	0	0	-1	2	0	0	2	0
RAC875_rep_c77874_269	2	0	0	0	0	2	0	2	0	0	0	2	0	0	0	0	2	0	0	0	2	2	0	2	0	2	0	0	2	0	0	2	2	0	0	2	0	2	2	0	0	0	0	-1	2	0	0	2	0
wsnp_Ex_c10186_16720660	2	0	0	0	0	2	0	2	0	0	0	2	0	0	0	0	2	0	0	0	2	2	0	2	0	2	0	0	2	0	0	2	2	0	0	2	0	2	2	0	0	0	0	-1	2	0	0	2	0
wsnp_Ex_c9094_15139750	2	0	0	0	0	2	0	2	0	0	0	2	0	-1	0	0	2	0	0	0	2	2	0	2	0	2	0	0	2	0	0	2	2	0	0	2	0	2	2	0	0	0	0	-1	2	0	0	2	0
wsnp_Ex_rep_c66930_65358529	2	0	0	0	0	2	0	2	0	0	0	2	0	0	0	0	2	0	0	0	2	2	0	2	0	2	0	0	2	0	0	2	2	0	0	2	0	2	2	0	0	0	0	0	2	0	0	2	0
wsnp_JD_c5620_6774675	2	0	0	0	0	2	0	2	0	0	0	2	0	-1	0	0	2	0	0	0	2	2	0	2	0	2	0	0	2	0	0	2	2	0	0	2	0	2	2	0	0	0	0	-1	2	0	0	2	0
wsnp_Ku_c61953_63254478	2	0	0	0	0	2	0	2	0	0	0	2	0	-1	0	0	2	0	0	0	2	2	0	2	0	2	0	0	2	0	0	2	2	0	0	2	0	2	2	0	0	0	0	-1	2	0	0	2	0
Excalibur_c10390_104	2	0	0	0	0	2	0	2	0	0	0	2	0	-1	0	0	2	0	0	0	2	2	0	2	0	2	0	0	2	0	0	2	2	0	0	2	0	2	2	0	0	0	0	-1	2	0	0	2	0
Kukri_c16665_595	2	0	0	0	0	2	0	2	0	0	0	2	0	-1	0	0	2	0	0	0	2	2	0	2	0	2	0	0	2	0	0	2	2	0	0	2	0	2	2	0	0	0	0	-1	2	0	0	2	0
RAC875_c110384_153	2	0	0	0	0	2	0	2	0	0	0	2	0	0	0	0	2	0	0	0	2	2	0	2	0	2	0	0	2	0	0	2	2	0	0	2	0	2	2	0	0	0	0	0	2	0	0	2	0
RAC875_c14911_1282	2	0	0	0	0	2	0	2	0	0	0	2	0	-1	0	0	2	0	0	0	2	2	0	2	0	2	0	0	2	0	0	2	2	0	0	2	0	2	2	0	0	0	0	-1	2	0	0	2	0
RAC875_c38663_2179	2	0	0	0	0	2	0	2	0	0	0	2	0	-1	0	0	2	0	0	0	2	2	0	2	0	2	0	0	2	0	0	2	2	0	0	2	0	2	2	0	0	0	0	0	2	0	0	2	0
RAC875_c59416_158	2	0	0	0	0	2	0	2	0	0	0	2	0	0	0	0	2	0	0	0	2	2	0	2	0	2	0	0	2	0	0	2	2	0	0	2	0	2	2	0	0	0	0	-1	2	0	0	2	0
RAC875_c9526_88	2	0	0	0	0	2	0	2	0	0	0	2	0	0	0	0	2	0	0	0	2	2	0	2	0	2	0	0	2	0	0	2	2	0	0	2	0	2	2	0	0	0	0	-1	2	0	0	2	0
RAC875_rep_c69241_454	2	0	0	0	0	2	0	2	0	0	0	2	0	0	0	0	2	0	0	0	2	2	0	2	0	2	0	0	2	0	0	2	2	0	0	2	0	2	2	0	0	0	0	-1	2	0	0	2	0
RAC875_rep_c74695_101	2	0	0	0	0	2	0	2	0	0	0	2	0	0	0	0	2	0	0	0	2	2	0	2	0	2	0	0	2	0	0	2	2	0	0	2	0	2	2	0	0	0	0	-1	2	0	0	2	0
RFL_Contig1053_65	2	0	0	0	0	2	0	2	0	0	0	2	0	-1	0	0	2	0	0	0	2	2	0	2	0	2	0	0	2	0	0	2	2	0	0	2	0	2	2	0	0	0	0	-1	2	0	0	2	0
TA004056-0809	2	0	0	0	0	2	0	2	0	0	0	2	0	-1	0	0	2	0	0	0	2	2	0	2	0	2	0	0	2	0	0	2	2	0	0	2	0	2	2	0	0	0	0	-1	2	0	0	2	0
wsnp_BE497618A_Ta_1_1	2	0	0	0	0	2	0	2	0	0	0	2	0	0	0	0	2	0	0	0	2	2	0	2	0	2	0	0	2	0	0	2	2	0	0	2	0	2	2	0	0	0	0	0	2	0	0	2	0
wsnp_CAP7_c32_19340	2	0	0	0	0	2	0	2	0	0	0	2	0	0	0	0	2	0	0	0	2	2	0	2	0	2	0	0	2	0	0	2	2	0	0	2	0	2	2	0	0	0	0	0	2	0	0	2	0
wsnp_Ex_c10390_17007929	2	0	0	0	0	2	0	2	0	0	0	2	0	-1	0	0	2	0	0	0	2	2	0	2	0	2	0	0	2	0	0	2	2	0	0	2	0	2	2	0	0	0	0	-1	2	0	0	2	0
wsnp_Ex_c10463_17113256	2	0	0	0	0	2	0	2	0	0	0	2	0	-1	0	0	2	0	0	0	2	2	0	2	0	2	0	0	2	0	0	2	2	0	0	2	0	2	2	0	0	0	0	-1	2	0	0	2	0
wsnp_Ex_c12818_20334933	2	0	0	0	0	2	0	2	0	0	0	2	0	-1	0	0	2	0	0	0	2	2	0	2	0	2	0	0	2	0	0	2	2	0	0	2	0	2	2	0	0	0	0	-1	2	0	0	2	0
wsnp_Ex_c31173_39999624	2	0	0	0	0	2	0	2	0	0	0	2	0	-1	0	0	2	0	0	0	2	2	0	2	0	2	0	0	2	0	0	2	2	0	0	2	0	2	2	0	0	0	0	-1	2	0	0	2	0
wsnp_Ex_c6044_10590220	2	0	0	0	0	2	0	2	0	0	0	2	0	-1	0	0	2	0	0	0	2	2	0	2	0	2	0	0	2	0	0	2	2	0	0	2	0	2	2	0	0	0	0	-1	2	0	0	2	0
wsnp_Ex_rep_c69890_68851948	2	0	0	0	0	2	0	2	0	0	0	2	0	0	0	0	2	0	0	0	2	2	0	2	0	2	0	0	2	0	0	2	2	0	0	2	0	2	2	0	0	0	0	0	2	0	0	2	0
wsnp_JD_c14769_14413046	2	0	0	0	0	2	0	2	0	0	0	2	0	-1	0	0	2	0	0	0	2	2	0	2	0	2	0	0	2	0	0	2	2	0	0	2	0	2	2	0	0	0	0	-1	2	0	0	2	0
wsnp_Ku_c11945_19406789	2	0	0	0	0	2	0	2	0	0	0	2	0	-1	0	0	2	0	0	0	2	2	0	2	0	2	0	0	2	0	0	2	2	0	0	2	0	2	2	0	0	0	0	-1	2	0	0	2	0
wsnp_Ku_c14515_22860258	2	0	0	0	0	2	0	2	0	0	0	2	0	-1	0	0	2	0	0	0	2	2	0	2	0	2	0	0	2	0	0	2	2	0	0	2	0	2	2	0	0	0	0	-1	2	0	0	2	0
wsnp_Ra_rep_c107017_90667618	2	0	0	0	0	2	0	2	0	0	0	2	0	0	0	0	2	0	0	0	2	2	0	2	0	2	0	0	2	0	0	2	2	0	0	2	0	2	2	0	0	0	0	0	2	0	0	2	0
GENE-2768_150	2	0	0	0	0	2	0	2	0	0	0	2	0	0	0	0	2	0	0	0	2	2	0	2	0	2	0	0	2	0	0	2	2	0	0	2	0	2	2	0	0	0	0	0	2	0	0	2	0
TA001684-0426	2	0	0	0	0	2	0	2	0	0	0	2	0	-1	0	0	2	0	0	0	2	2	0	2	0	2	0	0	2	0	0	2	2	0	0	2	0	2	2	0	0	0	0	-1	2	0	0	2	0
RFL_Contig5998_745	2	0	0	0	0	2	0	2	0	0	0	2	0	0	0	0	2	0	0	0	2	2	0	2	0	2	0	0	2	0	0	2	2	0	0	2	0	2	2	0	0	0	0	0	2	0	0	2	0
Ex_c5979_1449	2	0	0	0	0	2	0	2	0	0	0	2	0	0	0	0	2	0	0	0	2	2	0	2	0	2	0	0	2	0	0	2	2	0	0	2	0	2	2	0	0	0	0	0	2	0	0	2	0
Excalibur_c10157_180	2	0	0	0	0	2	0	2	0	0	0	2	0	0	0	0	2	0	0	0	2	2	0	2	0	2	0	0	2	0	0	2	2	0	0	2	0	2	2	0	0	0	0	0	2	0	0	2	0
tplb0051b16_1324	2	0	0	0	0	2	0	2	0	0	0	2	0	0	0	0	2	0	0	0	2	2	0	2	0	2	0	0	2	0	0	2	2	0	0	2	0	2	2	0	0	0	0	0	2	0	0	2	0
wsnp_CAP7_c2931_1395666	2	0	0	0	0	2	0	2	0	0	0	2	0	-1	0	0	2	0	0	0	2	2	0	2	0	2	0	0	2	0	0	2	2	0	0	2	0	2	2	0	0	0	0	-1	2	0	0	2	0
wsnp_Ex_c5979_10480527	2	0	0	0	0	2	0	2	0	0	0	2	0	-1	0	0	2	0	0	0	2	2	0	2	0	2	0	0	2	0	0	2	2	0	0	2	0	2	2	0	0	0	0	-1	2	0	0	2	0
RAC875_c65221_438	2	0	0	0	0	2	0	2	0	0	0	2	0	0	2	0	2	0	0	0	2	2	0	2	0	2	0	0	2	0	0	2	0	0	0	2	0	2	2	0	0	0	0	0	2	0	0	2	0
tplb0022j01_1046	2	0	0	0	0	2	0	2	0	0	0	2	0	0	-1	0	2	0	0	0	2	2	0	2	0	2	0	0	2	0	0	2	0	0	0	2	0	2	2	0	0	0	0	0	2	0	0	2	0
wsnp_Ku_c48043_54334230	2	0	0	0	0	2	0	2	0	0	0	2	0	0	2	0	2	0	0	0	2	2	0	2	0	2	0	0	2	0	0	2	0	0	0	2	0	2	2	0	0	0	0	0	2	0	0	2	0
Excalibur_c18575_310	2	0	0	0	0	2	0	2	0	0	0	2	0	0	-1	0	2	0	0	0	2	2	0	2	0	2	0	0	2	0	0	2	0	0	0	2	0	2	2	0	0	0	0	0	2	0	0	2	0
Excalibur_c32366_122	2	0	0	0	0	2	0	2	0	0	0	2	0	0	-1	0	2	0	0	0	2	2	0	2	0	2	0	0	2	0	0	2	0	0	0	2	0	2	2	0	0	0	0	0	2	0	0	2	0
Excalibur_rep_c80895_175	2	0	0	0	0	2	0	2	0	0	0	2	0	0	-1	0	2	0	0	0	2	2	0	2	0	2	0	0	2	0	0	2	0	0	0	2	0	2	2	0	0	0	0	0	2	0	0	2	0
Excalibur_rep_c80895_284	2	0	0	-1	0	2	0	2	0	0	0	2	0	0	-1	0	2	0	0	0	2	2	0	2	0	2	0	0	2	0	0	2	0	0	0	2	0	2	2	0	0	0	0	0	2	0	0	2	0
Kukri_c48385_121	2	0	0	0	0	2	0	2	0	0	0	2	0	0	2	0	2	0	0	0	2	2	0	2	0	2	0	0	2	0	0	2	0	0	0	2	0	2	2	0	0	0	0	0	2	0	0	2	0
Kukri_c9578_2045	2	0	0	0	0	2	0	2	0	0	0	2	0	0	-1	0	2	0	0	0	2	2	0	2	0	2	0	0	2	0	0	2	0	0	0	2	0	2	2	0	0	0	0	0	2	0	0	2	0
wsnp_Ex_c30876_39741201	2	0	0	0	0	2	0	2	0	0	0	2	0	0	-1	0	2	0	0	0	2	2	0	2	0	2	0	0	2	0	0	2	0	0	0	2	0	2	2	0	0	0	0	0	2	0	0	2	0
wsnp_Ex_rep_c70327_69270561	2	0	0	0	0	2	0	2	0	0	0	2	0	0	-1	0	2	0	0	0	2	2	0	2	0	2	0	0	2	0	0	2	0	0	0	2	0	2	2	0	0	0	0	-1	2	0	0	2	0
wsnp_Ku_c5979_10559245	2	0	0	0	0	2	0	2	0	0	0	2	0	0	-1	0	2	0	0	0	2	2	0	2	0	2	0	0	2	0	0	2	0	0	0	2	0	2	2	0	0	0	0	-1	2	0	0	2	0
Kukri_c13991_279	2	0	0	0	0	2	0	2	-1	0	0	2	0	-1	2	0	2	0	0	0	2	2	0	2	0	2	0	0	2	0	0	2	0	0	0	2	0	2	2	0	0	0	0	-1	2	0	0	2	0
Kukri_c13991_655	2	0	0	0	0	2	0	2	-1	0	0	2	0	-1	2	0	2	0	0	0	2	2	0	2	0	2	0	0	2	0	0	2	0	0	0	2	0	2	2	0	0	0	0	-1	2	0	0	2	0
CAP12_c5519_132	2	0	0	0	0	2	0	2	-1	0	0	2	0	-1	-1	0	2	0	0	0	2	2	0	2	0	2	0	0	2	0	0	2	0	0	0	2	0	2	2	0	0	0	0	-1	2	0	0	2	0
Kukri_rep_c94421_94	2	0	0	0	0	2	0	2	0	0	0	2	0	-1	-1	0	2	0	0	0	2	2	0	2	0	2	0	0	2	0	0	2	0	0	0	2	0	2	2	0	0	0	0	-1	2	0	0	2	0
BobWhite_c48455_818	2	0	0	0	0	2	0	2	0	0	0	2	0	0	2	0	2	0	0	0	2	2	0	2	0	2	0	0	2	0	0	2	0	0	0	2	0	2	2	0	0	0	0	0	2	0	0	2	0
Ex_c23792_486	2	0	0	0	0	2	0	2	0	0	0	2	0	-1	-1	0	2	0	0	0	2	2	0	2	0	2	0	0	2	0	0	2	0	0	0	2	0	2	2	0	0	0	0	-1	2	0	0	2	0
IAAV125	2	0	0	0	0	2	0	2	0	0	0	2	0	0	-1	0	2	0	0	0	2	2	0	2	0	2	0	0	2	0	0	2	0	0	0	2	0	2	2	0	0	0	0	-1	2	0	0	2	0
Ra_c30013_483	2	0	0	0	0	2	0	2	0	0	0	2	0	-1	-1	0	2	0	0	0	2	2	0	2	0	2	0	0	2	0	0	2	0	0	0	2	0	2	2	0	0	0	0	-1	2	0	0	2	0
wsnp_Ex_c2266_4247520	2	0	0	0	0	2	0	2	0	0	0	2	0	-1	2	0	2	0	0	0	2	2	0	2	0	2	0	0	2	0	0	2	0	0	0	2	0	2	2	0	0	0	0	-1	2	0	0	2	0
wsnp_Ra_c33762_42584098	2	0	0	0	0	2	0	2	0	0	0	2	0	-1	2	0	2	0	0	0	2	2	0	2	0	2	0	0	2	0	0	2	0	0	0	2	0	2	2	0	0	0	0	0	2	0	0	2	0
BS00103813_51	2	0	0	0	0	2	0	2	0	0	0	2	0	0	-1	0	2	0	0	0	2	2	0	2	0	2	0	0	2	0	0	2	0	0	0	2	0	2	2	0	0	0	0	-1	2	0	0	2	0
Excalibur_c31814_298	2	0	0	0	0	2	0	2	0	0	0	2	0	0	2	0	2	0	0	0	2	2	0	2	0	2	0	0	2	0	0	2	0	0	0	2	0	2	2	0	0	0	0	0	2	0	0	2	0
IAAV1461	2	0	0	0	0	2	0	2	0	0	0	2	0	-1	-1	0	2	0	0	0	2	2	0	2	0	2	0	0	2	0	0	2	0	0	0	2	0	2	2	0	0	0	0	-1	2	0	0	2	0
IAAV6223	2	0	0	0	0	2	0	2	0	0	0	2	0	-1	2	0	2	0	0	0	2	2	0	2	0	2	0	0	2	0	0	2	0	0	0	2	0	2	2	0	0	0	0	-1	2	0	0	2	0
IAAV7636	2	0	0	0	0	2	0	2	0	0	0	2	0	-1	-1	0	2	0	0	0	2	2	0	2	0	2	0	0	2	0	0	2	0	0	0	2	0	2	2	0	0	0	0	0	2	0	0	2	0
Kukri_c2634_487	2	0	0	0	0	2	0	2	0	0	0	2	0	-1	2	0	2	0	0	0	2	2	0	2	0	2	0	0	2	0	0	2	0	0	0	2	0	2	2	0	0	0	0	-1	2	0	0	2	0
Kukri_c39882_203	2	0	0	0	0	2	0	2	0	0	0	2	0	-1	2	0	2	0	0	0	2	2	0	2	0	2	0	0	2	0	0	2	0	0	0	2	0	2	2	0	0	0	0	-1	2	0	0	2	0
Kukri_c61419_550	2	0	0	0	0	2	0	2	0	0	0	2	0	-1	-1	0	2	0	0	0	2	2	0	2	0	2	0	0	2	0	0	2	0	0	0	2	0	2	2	0	0	0	0	-1	2	0	0	2	0
RAC875_c5394_1052	2	0	0	0	0	2	0	2	0	0	0	2	0	-1	-1	0	2	0	0	0	2	2	0	2	0	2	0	0	2	0	0	2	0	0	0	2	0	2	2	0	0	0	0	-1	2	0	0	2	0
tplb0024j12_840	2	0	0	0	0	2	0	2	0	0	0	2	0	-1	2	0	2	0	0	0	2	-1	0	2	0	2	0	0	2	0	0	2	0	0	0	2	0	2	2	0	0	0	0	-1	2	0	0	2	0
wsnp_BE398523A_Ta_2_1	2	0	0	0	0	2	0	2	0	0	0	2	0	-1	-1	0	2	0	0	0	2	2	0	2	0	2	0	0	2	0	0	2	0	0	0	2	0	2	2	0	0	0	0	-1	2	0	0	2	0
wsnp_Ex_c10886_17694220	2	0	0	0	0	2	0	2	0	0	0	2	0	-1	2	0	2	0	0	0	2	2	0	2	0	2	0	0	2	0	0	2	0	0	0	2	0	2	2	0	0	0	0	-1	2	0	0	2	0
wsnp_Ex_c11663_18779609	2	0	0	0	0	2	0	2	0	0	0	2	0	-1	-1	0	2	0	0	0	2	2	0	2	0	2	0	0	2	0	0	2	0	0	0	2	0	2	2	0	0	0	0	-1	2	0	0	2	0
wsnp_Ex_c12_21212	2	0	0	0	0	2	0	2	0	0	0	2	0	-1	2	0	2	0	0	0	2	2	0	2	0	2	0	0	2	0	0	2	0	0	0	2	0	2	2	0	0	0	0	-1	2	0	0	2	0
wsnp_Ex_c13623_21404172	2	0	0	0	0	2	0	2	0	0	0	2	0	-1	2	0	2	0	0	0	2	2	0	2	0	2	0	0	2	0	0	2	0	0	0	2	0	2	2	0	0	0	0	-1	2	0	0	2	0
wsnp_Ex_c3463_6348659	2	0	0	0	0	2	0	2	0	0	0	2	0	-1	-1	0	2	0	0	0	2	2	0	2	0	2	0	0	2	0	0	2	0	0	0	2	0	2	2	0	0	0	0	-1	2	0	0	2	0
wsnp_Ex_c3463_6348808	2	0	0	0	0	2	0	2	0	0	0	2	0	-1	-1	0	2	0	0	0	2	2	0	2	0	2	0	0	2	0	0	2	0	0	0	2	0	2	2	0	0	0	0	-1	2	0	0	2	0
wsnp_Ex_c5492_9691241	2	0	0	0	0	2	0	2	0	0	0	2	0	-1	-1	0	2	0	0	0	2	2	0	2	0	2	0	0	2	0	0	2	0	0	0	2	0	2	2	0	0	0	0	-1	2	0	0	2	0
wsnp_Ex_c5492_9691880	2	0	0	0	0	2	0	2	0	0	0	2	0	-1	-1	0	2	0	0	0	2	2	0	2	0	2	0	0	2	0	0	2	0	0	0	2	0	2	2	0	0	0	0	-1	2	0	0	2	0
wsnp_Ex_c56880_58824784	2	0	0	0	0	2	0	2	0	0	0	2	0	-1	2	0	2	0	0	0	2	2	0	2	0	2	0	0	2	0	0	2	0	0	0	2	0	2	2	0	0	0	0	-1	2	0	0	2	0
wsnp_Ex_c8092_13695482	2	0	0	0	0	2	0	2	0	0	0	2	0	-1	-1	0	2	0	0	0	2	2	0	2	0	2	0	0	2	0	0	2	0	0	0	2	0	2	2	0	0	0	0	-1	2	0	0	2	0
wsnp_Ex_c9464_15689857	2	0	0	0	0	2	0	2	0	0	0	2	0	0	2	0	2	0	0	0	2	2	0	2	0	2	0	0	2	0	0	2	0	0	0	2	0	2	2	0	0	0	0	0	2	0	0	2	0
wsnp_Ex_rep_c101826_87124211	2	0	0	0	0	2	0	2	0	0	0	2	0	0	2	0	2	0	0	0	2	2	0	2	0	2	0	0	2	0	0	2	0	0	0	2	0	2	2	0	0	0	0	0	2	0	0	2	0
wsnp_Ex_rep_c67779_66463916	2	0	0	0	0	2	0	2	0	0	0	2	0	-1	2	0	2	0	0	0	2	2	0	2	0	2	0	0	2	0	0	2	0	0	0	2	0	2	2	0	0	0	0	-1	2	0	0	2	0
wsnp_Ku_c10224_16965872	2	0	0	0	0	2	0	2	0	0	0	2	0	-1	2	0	2	0	0	0	2	2	0	2	0	2	0	0	2	0	0	2	0	0	0	2	0	2	2	0	0	0	0	-1	2	0	0	2	0
Kukri_c48199_102	2	0	0	0	0	2	0	2	0	0	0	2	0	-1	2	0	2	0	0	0	2	2	0	2	0	2	0	0	2	0	0	2	0	0	0	2	0	2	2	0	0	0	0	-1	2	0	0	2	0
BS00023151_51	0	-1	0	2	2	0	0	2	2	0	0	2	0	0	0	0	2	0	0	0	2	2	0	0	0	2	0	0	2	2	0	2	0	0	2	2	0	2	2	0	0	0	0	-1	2	0	0	2	2
BS00021727_51	0	-1	0	2	2	0	0	2	2	0	0	2	0	0	0	0	2	0	0	0	2	2	0	0	0	2	0	0	2	2	0	2	0	0	2	2	0	2	2	0	0	0	0	-1	2	0	-1	2	2
Kukri_c27874_515	0	-1	0	0	2	2	0	2	2	0	0	2	0	-1	0	0	2	0	0	0	2	2	0	0	0	2	0	0	2	2	0	2	0	0	2	2	0	2	2	0	0	0	0	-1	2	0	0	0	2
wsnp_Ex_c13031_20625900	0	-1	0	0	2	2	0	2	2	0	0	2	0	-1	0	0	2	0	0	0	2	2	0	0	0	2	0	0	2	2	0	2	0	0	2	2	0	2	2	0	0	0	0	-1	2	0	0	0	2
wsnp_Ex_rep_c66324_64493429	0	-1	0	0	2	2	0	2	2	0	0	2	0	-1	0	0	2	0	0	0	2	2	0	0	0	2	0	0	2	2	0	2	0	0	2	2	0	2	2	0	0	0	0	-1	2	0	0	0	2
IAAV615	0	-1	0	0	2	2	0	2	2	0	0	2	0	-1	0	0	2	0	0	0	2	2	0	0	0	2	0	0	2	2	0	2	0	0	2	2	0	2	2	0	0	0	0	-1	2	0	0	0	2
Ex_c66324_1151	0	-1	0	0	2	2	0	2	2	0	0	2	0	-1	0	0	2	0	0	0	2	2	0	0	0	2	0	0	2	2	0	2	0	0	2	2	0	2	2	0	0	0	0	-1	2	0	0	0	2
wsnp_Ex_c5470_9657856	0	2	0	0	2	0	0	2	2	0	2	2	0	0	0	0	2	0	0	0	2	2	0	0	0	2	0	0	2	2	0	2	0	0	2	2	0	2	2	0	0	0	0	0	2	0	0	2	2
wsnp_Ku_c2317_4448102	0	-1	0	0	2	0	0	2	2	0	2	2	0	-1	0	0	2	0	0	0	2	2	0	0	0	2	0	0	2	2	0	2	0	0	2	2	0	2	2	0	0	0	0	-1	2	0	0	2	2
Ku_c6779_1381	0	-1	0	0	2	0	0	2	2	0	2	2	0	-1	0	0	2	0	0	0	2	2	0	0	0	2	0	0	2	2	0	2	0	0	2	2	0	2	2	0	0	0	0	-1	2	0	0	2	2
Tdurum_contig97887_268	0	2	0	0	2	0	0	2	2	0	2	2	0	0	0	0	2	0	0	0	2	2	0	0	0	2	0	0	2	2	0	2	0	0	2	0	0	2	2	2	0	0	0	0	2	0	0	2	2
wsnp_Ex_c19207_28125072	0	-1	0	0	2	0	0	2	2	0	2	2	0	0	0	0	2	0	0	0	2	2	0	0	0	2	0	0	2	2	0	2	0	0	2	0	0	2	2	2	0	0	0	0	2	0	0	2	2
Tdurum_contig47148_651	0	-1	0	0	2	0	0	2	2	0	2	2	0	0	0	0	2	0	0	0	2	2	0	0	0	2	0	0	2	2	0	2	0	0	2	0	0	2	2	2	0	0	-1	-1	2	0	0	2	2
RAC875_c25124_182	0	-1	0	0	2	0	0	2	2	0	2	2	0	-1	0	0	2	0	0	0	2	2	0	0	0	0	0	0	2	2	0	2	0	0	2	0	0	0	2	2	0	0	-1	-1	2	0	0	2	2
wsnp_Ku_c3237_6024936	0	-1	0	0	2	0	0	2	2	0	2	2	0	0	0	0	2	0	0	0	2	2	0	0	0	0	0	0	2	2	0	2	0	0	2	0	0	0	2	2	0	0	-1	2	2	0	0	2	2
wsnp_Ex_c24474_33721784	0	-1	0	0	2	0	0	2	2	0	2	2	0	0	0	0	2	0	0	0	2	2	0	0	0	0	0	0	2	2	0	2	0	0	2	0	0	0	2	2	0	0	-1	2	2	0	0	2	2
wsnp_Ku_c4924_8816643	0	2	0	0	2	0	0	2	2	0	2	2	0	2	0	0	2	0	0	0	2	2	0	0	0	0	0	0	2	2	0	2	0	0	2	0	0	0	2	2	0	0	0	2	2	0	0	2	2
Tdurum_contig42526_994	0	2	0	0	2	0	0	2	2	0	2	2	0	0	0	0	2	0	0	0	2	2	0	0	0	0	0	0	2	2	0	0	0	0	2	0	0	0	2	2	0	0	0	2	2	0	0	2	2
Excalibur_c46394_762	0	2	0	0	2	0	0	2	2	0	2	2	0	0	0	0	2	0	0	0	2	2	0	0	0	0	0	0	2	2	0	0	0	0	2	0	0	0	2	2	0	0	0	2	2	0	0	2	2
Excalibur_rep_c107908_308	0	2	0	0	2	0	0	2	2	0	2	2	0	0	0	0	2	0	0	0	2	2	0	0	0	0	0	0	2	2	0	0	0	0	2	0	0	0	2	2	0	0	-1	2	2	0	0	2	2
BS00108849_51	0	-1	0	0	2	2	0	2	2	0	2	2	0	-1	0	0	0	0	0	0	2	2	0	0	0	0	0	0	2	2	0	0	0	0	2	0	0	0	2	2	0	2	-1	2	2	2	-1	2	2
RAC875_c20429_903	0	2	0	0	2	2	0	2	2	0	2	2	0	-1	0	0	0	0	0	0	2	2	0	0	0	0	0	0	2	2	0	0	0	0	2	0	0	0	0	2	0	2	2	2	2	2	0	2	2
wsnp_Ex_c41074_47987860	0	2	0	0	2	2	0	2	2	0	2	2	0	-1	0	0	0	0	0	0	2	2	0	0	0	0	0	0	2	2	0	0	0	0	2	0	0	0	0	2	0	2	2	2	2	2	-1	2	2
BS00065444_51	0	-1	0	0	2	2	0	2	-1	0	2	2	0	-1	0	0	0	0	0	0	2	2	0	0	0	0	0	0	2	2	0	0	0	0	2	0	0	0	0	2	0	2	-1	2	2	2	0	2	2
Ex_c57499_418	0	2	0	0	2	2	0	2	2	0	2	2	0	-1	0	0	0	0	0	0	2	2	0	0	0	0	0	0	2	2	0	0	0	0	2	0	0	0	0	2	0	2	-1	2	2	2	0	2	2
Excalibur_rep_c114451_411	0	2	0	0	2	2	0	2	2	0	2	2	0	-1	0	0	0	0	0	0	2	2	0	0	0	0	0	0	2	2	0	0	0	0	2	0	0	0	0	2	0	2	-1	2	2	2	0	2	2
Kukri_c6224_492	0	-1	0	0	2	2	0	2	-1	0	2	2	0	-1	0	0	0	0	0	0	2	2	0	0	0	0	0	0	2	2	0	0	0	0	2	0	0	0	0	2	0	2	-1	2	2	2	0	2	2
Excalibur_c57499_268	0	2	0	0	2	2	0	2	2	0	2	2	0	0	0	0	0	0	0	0	2	2	0	0	0	0	0	0	2	2	0	0	0	0	2	0	0	0	0	2	0	2	0	2	2	2	-1	2	2
Kukri_c59705_167	2	2	0	0	2	2	0	2	2	0	2	2	0	-1	0	0	0	0	0	2	2	2	0	0	0	0	0	0	2	2	0	0	0	0	2	0	0	0	0	2	0	2	2	2	2	2	0	2	2
RAC875_c961_341	2	2	0	0	2	2	0	2	2	0	2	2	0	-1	0	0	0	0	0	2	2	2	0	0	0	0	0	0	2	2	0	0	0	0	2	0	0	0	0	2	0	2	-1	2	2	2	0	2	2
JD_c4438_839	2	-1	0	0	2	2	0	2	-1	0	2	2	0	-1	0	0	0	0	0	2	2	2	0	0	0	0	0	0	2	2	0	0	0	0	2	0	0	0	0	2	0	2	-1	2	2	2	0	2	2
Kukri_c20719_949	2	2	0	0	2	2	0	-1	2	0	2	2	0	2	0	0	0	0	0	2	2	2	0	0	0	0	0	0	2	2	0	0	0	0	2	0	0	0	0	2	0	-1	2	2	2	2	0	2	2
BobWhite_c20282_164	2	2	2	0	2	2	0	2	2	0	2	2	0	0	0	0	0	0	0	2	2	2	0	0	0	0	0	0	2	2	0	0	0	0	2	0	0	0	0	2	0	2	-1	2	2	2	0	2	2
Kukri_c25832_687	2	2	2	0	2	2	0	2	2	0	2	2	0	-1	0	0	0	0	0	2	2	2	0	0	0	0	0	0	2	2	0	0	0	0	2	0	0	0	0	2	0	2	-1	2	2	2	0	2	2
Kukri_c25832_794	2	2	2	0	2	2	0	2	2	0	2	2	0	-1	0	0	0	0	0	2	2	2	0	0	0	0	0	0	2	2	0	0	0	0	2	0	0	0	0	2	0	2	-1	2	2	2	0	2	2
Tdurum_contig47858_908	2	2	2	0	2	2	0	2	2	0	2	0	0	0	0	0	0	0	0	2	2	2	0	0	0	0	0	2	2	2	0	0	0	0	2	0	0	0	0	2	2	2	2	2	2	2	0	2	2
wsnp_Ex_c2288_4293430	2	2	2	2	2	2	0	2	0	0	2	2	0	-1	0	0	0	0	0	2	2	2	0	0	0	0	0	2	2	2	0	0	0	0	2	0	0	0	0	2	2	2	-1	2	2	2	0	2	2
RAC875_c56535_256	2	2	2	2	2	2	0	2	0	0	2	2	0	-1	0	0	0	0	0	2	2	2	0	0	0	0	0	2	2	2	0	0	0	0	2	0	0	0	0	2	2	2	-1	2	2	2	0	2	2
Excalibur_c5624_1026	2	2	2	2	2	2	0	2	0	0	2	2	0	-1	0	0	0	0	0	2	2	2	0	0	0	0	0	2	2	2	0	0	0	0	2	0	0	0	0	2	2	2	-1	2	2	2	0	2	2
Excalibur_c5624_845	2	2	2	2	2	2	0	2	0	0	2	2	0	-1	0	0	0	0	0	2	2	2	0	0	0	0	0	2	2	2	0	0	0	0	2	0	0	0	0	2	2	2	0	2	2	2	0	2	2
Kukri_c34435_265	2	2	2	2	2	2	0	2	0	0	2	2	0	-1	0	0	0	0	0	2	2	2	0	0	0	0	0	2	2	2	0	0	0	0	2	0	0	0	0	2	2	2	2	2	2	2	0	2	2
Kukri_rep_c106490_583	2	2	2	2	2	2	0	2	0	0	2	2	0	0	0	0	0	0	0	2	2	2	0	0	0	0	0	2	2	2	0	0	0	0	2	0	0	0	0	2	2	2	-1	2	2	2	0	2	2
tplb0033c09_1345	2	2	2	2	2	2	0	2	0	0	2	2	0	-1	0	0	0	0	0	2	2	2	0	0	0	0	0	2	2	2	0	0	0	0	2	0	0	0	0	2	2	2	-1	2	2	2	0	2	2
Kukri_c29142_1046	2	2	2	2	2	2	0	2	0	0	2	2	0	2	0	0	0	0	0	2	2	2	0	0	0	0	0	2	2	2	0	0	0	0	2	0	0	0	0	2	2	2	2	2	2	2	0	2	2
Kukri_c29142_450	2	2	2	2	2	2	0	2	0	0	2	2	0	2	0	0	0	0	0	2	2	2	0	0	0	0	0	2	2	2	0	0	0	0	2	0	0	0	0	2	2	2	2	2	2	2	0	2	2
Kukri_c29142_473	2	2	2	2	2	2	0	2	0	0	2	2	0	-1	0	0	0	0	0	2	2	2	0	0	0	0	0	2	2	2	0	0	0	0	2	0	0	0	0	2	2	2	-1	2	2	2	0	2	2
Kukri_c29142_747	2	2	2	2	2	2	0	2	0	0	2	2	0	-1	0	0	0	0	0	2	2	2	0	0	0	0	0	2	2	2	0	0	0	0	2	0	0	0	0	2	2	2	-1	2	2	2	0	2	2
RAC875_c278_2934	2	2	2	2	2	2	0	2	0	0	2	2	0	2	0	0	0	0	0	2	2	2	0	0	0	0	0	2	2	2	0	0	0	0	2	0	0	0	0	2	2	2	2	2	2	2	0	2	2
RAC875_c8472_1174	2	2	2	2	2	2	0	2	0	0	2	2	0	-1	0	0	0	0	0	2	2	2	0	0	0	0	0	2	2	2	0	0	0	0	2	0	0	0	0	2	2	2	-1	2	2	2	0	2	2
RAC875_c88582_131	2	2	2	2	2	2	0	2	-1	0	2	2	0	-1	0	0	0	0	0	2	2	2	0	0	0	0	0	2	2	2	0	0	0	0	2	0	2	0	0	2	2	2	-1	2	2	2	0	2	2
RAC875_c88582_316	2	2	2	2	2	2	0	2	0	0	2	2	0	-1	0	0	0	0	0	2	2	2	0	0	0	0	0	2	2	2	0	0	0	0	2	0	2	0	0	2	2	2	-1	2	2	2	0	2	2
RFL_Contig4336_184	2	2	2	2	2	2	0	2	0	0	2	2	0	-1	0	0	0	0	0	2	2	2	0	0	0	0	0	2	2	2	0	0	0	0	2	0	2	0	0	2	2	2	-1	2	2	2	0	2	2
BS00065619_51	2	2	2	2	2	2	0	2	2	2	2	2	0	-1	0	0	0	2	0	2	2	2	0	2	2	0	2	2	2	2	2	0	2	0	2	0	2	0	0	2	2	2	2	2	2	0	2	2	2
BS00110021_51	2	2	2	2	2	2	0	2	2	2	2	2	0	-1	0	0	0	2	0	2	2	2	0	2	2	0	2	2	2	2	2	0	2	0	2	0	2	0	0	2	2	2	2	2	2	0	2	2	2
Excalibur_c39447_143	2	2	2	2	2	2	0	2	-1	2	2	2	0	-1	0	0	0	2	0	2	2	2	0	2	2	0	2	2	2	2	2	0	2	0	2	0	2	0	0	2	2	2	2	2	2	0	2	2	2
Kukri_c976_439	2	2	2	2	2	2	0	2	-1	2	2	2	0	-1	0	0	0	2	0	2	2	2	0	2	2	0	2	2	2	2	2	0	2	0	2	0	2	0	0	2	2	2	2	2	2	0	2	2	2
D_GCE8AKX02GF3QZ_210	2	2	2	2	2	2	0	2	2	2	2	2	0	0	0	0	0	2	0	2	2	2	0	2	2	0	2	2	2	2	2	0	2	0	2	0	2	0	0	2	2	2	2	2	2	0	2	2	2
BS00039811_51	2	2	2	2	2	2	0	2	2	2	2	2	0	0	0	0	0	2	0	2	2	2	0	2	2	0	2	2	2	0	2	0	2	0	2	0	2	0	0	2	2	2	2	2	2	0	2	2	2
BS00093289_51	2	2	2	2	2	2	0	2	2	2	2	2	0	0	0	0	0	2	0	2	2	2	0	2	2	0	2	2	2	0	2	0	2	0	2	0	2	0	0	2	2	2	2	2	2	0	2	2	2
BobWhite_c20322_153	2	2	2	2	2	2	0	2	2	2	2	2	0	-1	0	0	0	2	0	2	2	2	0	2	2	2	2	2	2	0	2	0	2	0	2	0	2	2	0	2	2	2	2	2	2	0	2	2	2
BobWhite_c20322_559	2	2	2	2	2	2	0	2	2	2	2	2	0	-1	0	0	0	2	0	2	2	2	0	2	2	2	2	2	2	-1	2	0	2	0	2	0	2	2	0	2	2	2	2	2	2	0	2	2	2
BS00045546_51	2	2	2	2	2	2	0	2	2	2	2	2	0	-1	0	0	0	2	0	2	2	2	0	2	2	2	2	2	2	0	2	0	2	0	2	0	2	2	0	2	2	2	2	2	2	0	2	2	2
BobWhite_c11327_185	2	2	2	2	2	2	0	2	2	2	2	2	0	0	0	0	0	2	0	2	2	2	0	2	2	2	2	2	2	0	2	0	2	0	2	0	2	2	0	2	2	2	2	2	2	0	2	2	2
BobWhite_c11327_491	2	2	2	2	2	2	0	2	2	2	2	2	0	-1	0	0	0	2	0	2	2	2	0	2	2	2	2	2	2	0	2	0	2	0	2	0	2	2	0	2	2	2	2	2	2	0	2	2	2
BobWhite_c20306_111	2	2	2	2	2	2	0	2	2	2	2	2	0	0	0	0	0	2	0	2	2	2	0	2	2	2	2	2	2	0	2	0	2	0	2	0	2	2	0	2	2	2	2	2	2	0	2	2	2
BobWhite_c20322_183	2	2	2	2	2	2	0	2	2	2	2	2	0	-1	0	0	0	2	0	2	2	2	0	2	2	2	2	2	2	0	2	0	2	0	2	0	2	2	0	2	2	2	2	2	2	0	2	2	2
IAAV2823	2	2	2	2	2	2	0	2	2	2	2	2	0	0	0	0	0	2	0	2	2	2	0	2	2	2	2	2	2	0	2	0	2	0	2	0	2	2	0	2	2	2	2	2	2	0	2	2	2
Tdurum_contig47783_676	2	2	2	2	2	2	0	2	2	2	2	2	0	-1	0	0	0	2	0	2	2	2	0	2	2	2	2	2	2	0	2	0	2	0	2	0	2	2	0	2	2	2	2	2	2	0	2	2	2
BS00021030_51	2	2	2	2	2	2	0	2	2	2	2	2	0	0	0	0	0	2	0	2	2	2	0	2	2	2	2	2	2	0	2	0	2	0	2	0	2	2	0	2	2	2	2	2	2	0	2	2	2
BS00045454_51	2	2	2	2	2	2	0	2	2	2	2	2	0	0	0	0	0	2	0	2	2	2	0	2	2	2	2	2	2	0	2	0	2	0	2	0	2	2	0	2	2	2	2	2	2	0	2	2	2
BS00045554_51	2	2	2	2	2	2	0	2	2	2	2	2	0	0	0	0	0	2	0	2	2	2	0	2	2	2	2	2	2	0	2	0	2	0	2	0	2	2	0	2	2	2	2	2	2	0	2	2	2
BS00070687_51	2	2	2	2	2	2	0	2	2	2	2	2	0	0	0	0	0	2	0	2	2	2	0	2	2	2	2	2	2	0	2	0	2	0	2	0	2	2	0	2	2	2	2	2	2	0	2	2	2
BS00075048_51	2	2	2	2	2	2	0	2	2	2	2	2	0	0	0	0	0	2	0	2	2	2	0	2	2	2	2	2	2	0	2	0	2	0	2	0	2	2	0	2	2	2	2	2	2	0	2	2	2
JD_c581_466	2	2	2	2	2	2	0	2	2	2	2	2	0	-1	0	0	0	2	0	2	2	2	0	2	2	2	2	2	2	0	2	0	2	0	2	0	2	2	0	2	2	2	2	2	2	0	2	2	2
Kukri_c20783_367	2	2	2	2	2	2	0	2	2	2	2	2	0	-1	0	0	0	2	0	2	2	2	0	2	2	2	2	2	2	0	2	0	2	0	2	0	2	2	0	2	2	2	2	2	2	0	2	2	2
RFL_Contig3424_931	2	2	2	2	2	2	0	2	2	2	2	2	0	0	0	0	0	2	0	2	2	2	0	2	2	2	2	2	2	0	2	0	2	0	2	0	2	2	0	2	2	2	2	2	2	0	2	2	2
Tdurum_contig10482_110	2	2	2	2	2	2	0	2	2	2	2	2	0	-1	0	0	0	2	0	2	2	2	0	2	2	2	2	2	2	0	2	0	2	0	2	0	2	2	0	2	2	2	2	2	2	0	2	2	2
wsnp_Ku_c20783_30448706	2	2	2	2	2	2	0	2	2	2	2	2	0	0	0	0	0	2	0	2	2	2	0	2	2	2	2	2	2	0	2	0	2	0	2	0	2	2	0	2	2	2	2	2	2	0	2	2	2
BobWhite_c20306_88	2	2	2	2	2	2	0	2	2	2	2	2	0	0	0	0	0	2	0	2	2	2	0	2	2	2	2	2	2	0	2	0	2	0	2	0	2	2	0	2	2	2	2	2	2	0	2	2	2
BS00000577_51	2	2	2	2	2	2	0	2	2	2	2	2	0	-1	0	0	0	2	0	2	2	2	0	2	2	2	2	2	2	0	2	0	2	0	2	0	2	2	0	2	2	2	2	2	2	0	2	2	2
BS00066336_51	2	2	2	2	2	2	0	2	2	2	2	2	0	0	0	0	0	2	0	2	2	2	0	2	2	2	2	2	2	0	2	0	2	0	2	0	2	2	0	2	2	2	2	2	2	0	2	2	2
BS00032622_51	2	2	2	2	2	2	0	2	2	2	2	2	0	-1	0	0	0	2	0	2	2	2	0	2	2	2	2	2	2	0	2	0	2	0	2	0	2	2	0	2	2	2	2	2	2	0	2	2	2
BS00048067_51	2	2	2	2	2	2	0	2	-1	2	2	2	0	-1	0	0	0	2	0	2	2	2	0	2	2	2	2	2	2	0	2	0	2	0	2	0	2	2	0	2	2	2	2	2	2	0	2	2	2
BS00064494_51	2	2	2	2	2	2	0	2	2	2	2	2	0	-1	0	0	0	2	0	2	2	2	0	2	2	2	2	2	2	0	2	0	2	0	2	0	2	2	0	2	2	2	2	2	2	0	2	2	2
BS00100441_51	2	2	2	2	2	2	0	2	2	2	2	2	0	-1	0	0	0	2	0	2	2	2	0	2	2	2	2	2	2	0	2	0	2	0	2	0	2	2	0	2	2	2	2	2	2	0	2	2	2
Excalibur_c30151_67	2	2	2	2	2	2	0	2	2	2	2	2	0	-1	0	0	0	2	0	2	2	2	0	2	2	2	2	2	2	0	2	0	2	0	2	0	2	2	0	2	2	2	2	2	2	0	2	2	2
Excalibur_c7753_51	2	2	2	2	2	2	0	2	2	2	2	2	0	2	0	0	0	2	0	2	2	2	0	2	2	2	2	2	2	0	2	0	2	0	2	0	2	2	0	2	2	2	2	2	2	0	2	2	2
GENE-0689_30	2	2	2	2	2	2	0	2	2	2	2	2	0	2	0	0	0	2	0	2	2	2	0	2	2	2	2	2	2	0	2	0	2	0	2	0	2	2	0	2	2	2	2	2	2	0	2	2	2
GENE-0689_776	2	2	2	2	2	2	0	2	2	2	2	2	0	-1	0	0	0	2	0	2	2	2	0	2	2	2	2	2	2	0	2	0	2	0	2	0	2	2	0	2	2	2	2	2	2	0	2	2	2
GENE-0689_791	2	2	2	2	2	2	0	2	2	2	2	2	0	-1	0	0	0	2	0	2	2	2	0	2	2	2	2	2	2	0	2	0	2	0	2	0	2	2	0	2	2	2	2	2	2	0	2	2	2
IAAV1125	2	2	2	2	2	2	0	2	2	2	2	2	0	-1	0	0	0	2	0	2	2	2	0	2	2	2	2	2	2	0	2	0	2	0	2	0	2	2	0	2	2	2	2	2	2	0	2	2	2
Kukri_c27648_350	2	2	2	2	2	2	0	2	2	2	2	2	0	-1	0	0	0	2	0	2	2	2	0	2	2	2	2	2	2	0	2	0	2	0	2	0	2	2	0	2	2	2	2	2	2	0	2	2	2
Kukri_c48194_641	2	2	2	2	2	2	0	2	2	2	2	2	0	0	0	0	0	2	0	2	2	2	0	2	2	2	2	2	2	0	2	0	2	0	2	0	2	2	0	2	2	2	2	2	2	0	2	2	2
RAC875_c6280_292	2	2	2	2	2	2	0	2	-1	2	2	2	0	-1	0	0	0	2	0	2	2	2	0	2	2	2	2	2	2	0	2	0	2	0	2	0	2	2	0	2	2	2	2	2	2	0	2	2	2
RFL_Contig3841_1986	2	2	2	2	2	2	0	2	2	2	2	2	0	-1	0	0	0	2	0	2	2	2	0	2	2	2	2	2	2	0	2	0	2	0	2	0	2	2	0	2	2	2	2	2	2	0	2	2	2
Tdurum_contig41127_265	2	2	2	2	2	2	0	2	-1	2	2	2	0	-1	0	0	0	2	0	2	2	2	0	2	2	2	2	2	2	0	2	0	2	0	2	0	2	2	0	2	2	2	2	2	2	0	2	2	2
Tdurum_contig75819_1117	2	2	2	2	2	2	0	2	2	2	2	2	0	-1	0	0	0	2	0	2	2	2	0	2	2	2	2	2	2	0	2	0	2	0	2	0	2	2	0	2	2	2	2	2	2	0	2	2	2
Tdurum_contig75819_1220	2	2	2	2	2	2	0	2	2	2	2	2	0	-1	0	0	0	2	0	2	2	2	0	2	2	2	2	2	2	0	2	0	2	0	2	0	2	2	0	2	2	2	2	2	2	0	2	2	2
Tdurum_contig75819_1471	2	2	2	2	2	2	0	2	2	2	2	2	0	-1	0	0	0	2	0	2	2	2	0	2	2	2	2	2	2	0	2	0	2	0	2	0	2	2	0	2	2	2	2	2	2	0	2	2	2
BS00091561_51	2	2	2	2	2	2	0	2	2	2	2	2	0	-1	0	0	0	2	0	2	2	2	0	2	2	2	2	2	2	0	2	0	2	0	2	0	2	2	0	2	2	2	2	2	2	0	2	2	2
BS00099982_51	2	2	2	2	2	2	0	2	2	2	2	2	0	2	0	0	0	2	0	2	2	2	0	2	2	2	2	2	2	0	2	0	2	0	2	0	2	2	0	2	2	2	2	2	2	0	2	2	2
IAAV2388	2	2	2	2	2	2	0	2	2	2	2	2	0	-1	0	0	0	2	0	2	2	2	0	2	2	2	2	2	2	0	2	0	2	0	2	0	2	2	0	2	2	2	2	2	2	0	2	2	2
RAC875_c17185_666	2	2	2	2	2	2	0	2	2	2	2	2	0	0	0	0	0	2	0	2	2	2	0	2	2	2	2	2	2	0	2	0	2	0	2	0	2	2	0	2	2	2	2	2	2	0	2	2	2
RFL_Contig3841_2313	2	2	2	2	2	2	0	2	2	2	2	2	0	-1	0	0	0	2	0	2	2	2	0	2	2	2	2	2	2	0	2	0	2	0	2	0	2	2	0	2	2	2	2	2	2	0	2	2	2
RFL_Contig3841_2409	2	2	2	2	2	2	0	2	2	2	2	2	0	-1	0	0	0	2	0	2	2	2	0	2	2	2	2	2	2	0	2	0	2	0	2	0	2	2	0	2	2	2	2	2	2	0	2	2	2
RFL_Contig3841_2433	2	2	2	2	2	2	0	2	2	2	2	2	0	-1	0	0	0	2	0	2	2	2	0	2	2	2	2	2	2	0	2	0	2	0	2	0	2	2	0	2	2	2	2	2	2	0	2	2	2
RFL_Contig3841_2595	2	2	2	2	2	2	0	2	2	2	2	2	0	-1	0	0	0	2	0	2	2	2	0	2	2	2	2	2	2	0	2	0	2	0	2	0	2	2	0	2	2	2	2	2	2	0	2	2	2
RFL_Contig3841_3051	2	2	2	2	2	2	0	2	2	2	2	2	0	0	0	0	0	2	0	2	2	2	0	2	2	2	2	2	2	0	2	0	2	0	2	0	2	2	0	2	2	2	2	2	2	0	2	2	2
Tdurum_contig75819_1309	2	2	2	2	2	2	0	2	2	2	2	2	0	-1	0	0	0	2	0	2	2	2	0	2	2	2	2	2	2	0	2	0	2	0	2	0	2	2	0	2	2	2	2	2	2	0	2	2	2
Tdurum_contig75819_1591	2	2	2	2	2	2	0	2	2	2	2	2	0	-1	0	0	0	2	0	2	2	2	0	2	2	2	2	2	2	0	2	0	2	0	2	0	2	2	0	2	2	2	2	2	2	0	2	2	2
Tdurum_contig93100_149	2	2	2	2	2	2	0	2	2	2	2	2	0	-1	0	0	0	2	0	2	2	2	0	2	2	2	2	2	2	0	2	0	2	0	2	0	2	2	0	2	2	2	2	2	2	0	2	2	2
Tdurum_contig93100_77	2	2	2	2	2	2	0	2	2	2	-1	-1	0	-1	0	0	0	2	0	2	2	2	0	2	2	2	2	2	2	0	2	0	2	0	2	0	2	2	0	2	2	2	2	2	2	0	2	2	2
wsnp_CAP7_c254_138937	2	2	2	2	2	2	0	2	2	2	2	2	0	0	0	0	0	2	0	2	2	2	0	2	2	2	2	2	2	0	2	0	2	0	2	0	2	2	0	2	2	2	2	2	2	0	2	2	2
wsnp_CAP7_c254_139077	2	2	2	2	2	2	0	2	2	2	2	2	0	0	0	0	0	2	0	2	2	2	0	2	2	2	2	2	2	0	2	0	2	0	2	0	2	2	0	2	2	2	2	2	2	0	2	2	2
BobWhite_c5649_344	2	2	2	2	2	2	0	2	2	2	2	2	0	2	0	0	0	2	0	2	2	2	0	2	2	2	2	2	2	0	2	0	2	0	2	0	2	2	0	2	2	2	2	2	2	0	2	2	2
Kukri_c25115_740	2	2	2	2	2	2	0	2	-1	2	2	2	0	0	0	0	0	2	0	2	2	2	0	2	2	2	2	2	2	0	2	0	2	0	2	0	2	2	0	2	2	2	2	2	2	0	2	2	2
BS00010645_51	2	2	2	-1	2	2	0	2	2	2	2	2	0	-1	0	0	0	2	0	2	2	2	0	2	2	2	2	2	2	0	2	0	2	0	2	0	2	2	0	2	2	2	2	2	2	0	2	2	2
Excalibur_c77192_78	2	2	2	2	2	2	0	2	2	2	2	2	0	-1	0	0	0	2	0	2	2	2	0	2	2	2	2	2	2	0	2	0	2	0	2	0	2	2	0	2	2	2	2	2	2	0	2	2	2
IAAV6615	2	2	2	2	2	2	0	2	2	2	2	2	0	-1	0	0	0	2	0	2	2	2	0	2	2	2	2	2	2	0	2	0	2	0	2	0	2	2	0	2	2	2	2	2	2	0	2	2	2
Jagger_c2200_347	2	2	2	2	2	2	0	2	2	2	2	2	0	0	0	0	0	2	0	2	2	2	0	2	2	2	2	2	2	0	2	0	2	0	2	0	2	2	0	2	2	2	2	2	2	0	2	2	2
Tdurum_contig60420_746	2	2	2	2	2	2	0	2	2	2	2	2	0	0	0	0	0	2	0	2	2	2	0	2	2	2	2	2	2	0	2	0	2	0	2	0	2	2	0	2	2	2	2	2	2	0	2	2	2
Kukri_c18346_556	2	2	2	2	2	2	0	2	2	2	2	2	0	2	0	0	0	2	0	2	2	2	0	2	2	2	2	2	2	0	2	0	2	0	2	0	2	2	0	2	2	2	2	2	2	0	2	2	2
Kukri_c35451_857	2	2	2	2	2	2	0	2	0	2	2	2	0	0	0	0	0	2	0	2	2	2	0	2	2	2	2	2	2	0	2	0	2	0	2	0	2	2	0	2	2	2	2	2	2	0	2	2	2
BS00022395_51	2	2	2	2	2	2	0	2	-1	2	2	2	0	-1	-1	2	0	2	0	2	2	2	0	2	2	0	2	2	2	0	2	2	2	0	2	0	2	0	0	2	2	2	2	2	2	0	2	2	2
Excalibur_c19666_961	2	2	2	2	2	2	0	2	2	2	2	2	0	0	0	2	0	2	0	2	2	2	0	2	2	0	2	2	2	0	2	2	2	0	2	0	2	0	0	2	2	2	2	2	2	0	2	2	2
Excalibur_c19666_989	2	2	2	2	2	2	0	2	2	2	2	2	0	0	0	2	0	2	0	2	2	2	0	2	2	0	2	2	2	0	2	2	2	0	2	0	2	0	0	2	2	2	2	2	2	0	2	2	2
Kukri_c17754_1179	2	2	2	2	2	2	0	2	2	2	2	2	0	0	-1	2	0	2	0	2	2	2	0	2	2	0	2	2	2	0	2	2	2	0	2	0	2	0	0	2	2	2	2	2	2	0	2	2	2
RAC875_c40654_206	2	2	2	2	2	2	0	2	2	2	2	2	0	0	-1	2	0	2	0	2	2	2	0	2	2	0	2	2	2	0	2	2	2	0	2	0	2	0	0	2	2	2	2	2	2	0	2	2	2
RAC875_c7734_411	2	2	2	2	2	2	0	2	2	2	2	2	0	0	0	2	0	2	0	2	2	2	0	2	2	0	2	2	2	0	2	2	2	0	2	0	2	0	0	2	2	2	2	2	2	0	2	2	2
RFL_Contig4686_700	2	2	2	2	2	2	0	2	2	2	2	2	0	0	0	2	0	2	0	2	2	2	0	2	2	0	2	2	2	0	2	2	2	0	2	0	2	0	0	2	2	2	2	2	2	0	2	2	2
wsnp_Ku_c15531_24168235	2	2	2	2	2	2	0	2	2	2	2	2	0	0	-1	2	0	2	0	2	2	2	0	2	2	0	2	2	2	0	2	2	2	0	2	0	2	0	0	2	2	2	2	2	2	0	2	2	2
Excalibur_c19666_203	2	2	2	2	2	2	0	2	2	2	2	2	0	0	-1	2	0	2	0	2	2	2	0	2	2	0	2	2	2	0	2	2	2	0	2	0	2	0	0	2	2	2	2	2	2	0	2	2	2
Excalibur_c22896_149	2	2	2	2	2	2	0	2	2	2	2	2	0	0	0	2	0	2	0	2	2	2	0	2	2	0	2	2	2	0	2	2	2	0	2	0	2	0	0	2	2	2	2	2	2	0	2	2	2
RAC875_c22936_495	2	2	2	2	2	2	0	2	2	2	2	2	0	0	-1	2	0	2	0	2	2	2	0	2	2	0	2	2	2	0	2	2	2	0	2	0	2	0	0	2	2	2	2	2	2	0	2	2	2
RAC875_c67397_116	2	2	2	2	2	2	0	2	2	2	2	2	0	-1	0	2	0	2	0	2	2	2	0	2	2	0	2	2	2	0	2	2	2	0	2	0	2	0	0	2	2	2	2	2	2	0	2	2	2
BS00021957_51	2	2	2	2	2	2	0	2	2	2	2	2	0	-1	-1	2	0	2	0	2	2	2	0	2	0	0	2	2	2	0	0	2	2	0	2	0	2	0	0	2	2	2	2	2	2	0	2	2	2
CAP12_c2972_140	2	2	2	2	2	2	0	2	2	2	2	2	0	0	0	2	0	2	0	2	2	2	0	2	0	0	2	2	2	0	0	2	2	0	2	0	2	0	0	2	2	2	2	2	2	0	2	2	2
RFL_Contig4095_1201	2	2	2	2	2	2	0	2	2	2	2	2	0	0	-1	2	0	2	0	2	2	2	0	2	0	0	2	2	2	0	0	2	2	0	2	0	2	0	0	2	2	2	2	2	2	0	2	2	2
wsnp_RFL_Contig3501_3652740	2	2	2	2	2	2	0	2	2	2	2	2	0	0	-1	2	0	2	0	2	2	2	0	2	0	0	2	2	2	0	0	2	2	0	2	0	2	0	0	2	2	2	2	2	2	0	2	2	2
TA004912-0408	2	2	2	2	2	2	0	2	2	2	2	2	0	0	-1	2	0	2	0	2	2	2	0	2	0	0	2	2	2	0	0	2	2	0	2	0	2	0	0	2	2	2	2	2	2	0	2	2	2
Excalibur_c14217_1260	2	2	2	2	2	2	0	2	2	2	2	2	0	0	-1	2	0	2	0	2	2	2	0	2	0	0	2	2	2	0	0	2	2	0	2	0	2	0	0	2	2	2	2	2	2	0	2	2	2
Ra_c16330_1197	2	2	2	2	2	2	0	2	2	2	2	2	0	0	0	2	0	2	0	2	2	2	0	2	0	0	2	2	2	0	0	2	2	0	2	0	2	0	0	2	2	2	2	2	2	0	2	2	2
Kukri_c17417_797	2	2	2	2	2	2	0	2	2	2	2	2	0	0	0	2	0	2	0	2	2	2	0	2	0	0	2	2	2	0	0	2	2	0	2	0	2	0	0	2	2	2	2	2	2	0	2	2	2
Kukri_c17417_291	2	2	2	2	2	2	0	2	-1	2	2	2	0	0	0	2	0	2	0	2	2	2	0	2	0	0	2	2	2	0	0	2	2	0	2	0	2	0	0	2	2	2	2	2	2	0	2	2	2
Kukri_c17417_407	2	2	2	2	2	2	0	2	-1	2	2	2	0	0	-1	2	0	2	0	2	2	2	0	2	0	0	2	2	2	0	0	2	2	0	2	0	2	0	0	2	2	2	2	2	2	0	2	2	2
Kukri_rep_c96828_86	2	2	2	2	2	2	0	2	2	2	2	2	0	0	-1	2	0	2	0	2	2	2	0	2	0	0	2	2	2	0	0	2	2	0	2	0	2	0	0	2	2	2	2	2	2	0	2	2	2
Kukri_c17417_571	2	2	2	2	2	2	0	2	-1	2	2	2	0	0	0	2	0	2	0	2	2	2	0	2	0	0	2	2	2	0	0	2	2	0	2	0	2	0	0	2	2	2	2	2	2	0	2	2	2
Ku_c12469_837	0	0	2	0	2	0	2	0	0	2	0	2	0	-1	-1	2	0	2	0	2	2	2	2	2	2	0	2	0	0	2	2	2	2	2	0	0	2	0	2	2	0	2	-1	-1	0	0	0	0	0
Ku_c12469_983	0	0	2	0	2	0	2	0	0	2	0	2	0	-1	-1	2	0	2	0	2	2	2	2	2	2	0	2	0	0	2	2	2	2	2	0	0	2	0	2	-1	0	2	-1	-1	0	0	0	0	0
Ra_c3966_2205	0	0	2	0	2	0	2	0	0	2	0	2	0	-1	-1	2	0	2	0	2	2	2	2	2	2	0	2	0	0	2	2	2	2	2	0	0	2	0	2	-1	0	2	-1	-1	0	0	0	0	0
wsnp_Ex_c5978_10478584	0	0	2	0	2	0	2	0	0	2	0	2	0	-1	-1	2	0	2	0	2	2	2	2	2	2	0	2	0	0	2	2	2	2	2	0	0	2	0	2	-1	0	2	-1	-1	0	0	0	0	0
BS00048892_51	0	0	2	0	2	0	2	0	0	2	0	2	0	-1	-1	2	0	2	0	2	2	2	2	2	2	0	2	0	0	2	2	2	2	2	0	0	2	0	2	-1	0	2	-1	-1	0	0	0	0	0
Excalibur_c49550_97	0	0	0	0	2	0	2	0	0	2	0	2	0	-1	2	2	0	2	0	2	2	2	2	2	2	0	2	0	0	2	2	2	2	2	0	0	2	0	2	2	0	2	-1	2	0	0	0	0	0
tplb0050c03_1003	2	0	0	0	2	0	2	0	0	2	0	2	0	2	0	0	0	2	0	2	2	2	2	2	2	0	2	0	0	0	2	2	2	2	0	2	2	0	0	2	0	2	2	2	0	0	0	0	0
CAP11_c1685_149	2	0	0	0	2	0	2	0	0	2	0	2	0	2	0	0	0	2	0	2	2	2	2	2	2	0	2	0	0	0	2	2	2	2	0	2	2	0	0	2	0	2	2	-1	0	0	0	0	0
Excalibur_c84439_196	2	0	0	0	2	0	2	0	0	2	0	2	0	2	0	0	0	2	0	2	2	2	2	2	2	0	2	0	0	0	2	2	2	2	0	2	2	0	0	2	0	2	2	2	0	0	0	0	0
Kukri_c6266_260	2	0	0	0	2	0	2	0	0	2	0	2	0	2	0	0	0	2	0	2	2	2	2	2	2	0	2	0	0	0	2	2	2	2	0	2	2	0	0	2	0	2	2	2	0	0	0	0	0
RAC875_c3964_752	2	0	0	0	2	0	2	0	0	2	0	2	0	2	0	0	0	2	0	2	2	2	2	2	2	0	2	0	0	0	2	2	2	2	0	2	2	0	0	2	0	2	2	-1	0	0	0	0	0
wsnp_Ex_c790_1554988	2	0	0	0	2	0	2	0	0	2	0	2	0	2	0	0	0	2	0	2	2	2	2	2	2	0	2	0	0	0	2	2	2	2	0	2	2	0	0	2	0	2	2	2	0	0	0	0	0
wsnp_CAP11_c1506_840938	2	0	0	0	2	0	2	0	0	2	0	2	0	2	0	0	0	2	0	2	2	2	2	2	2	0	2	0	0	0	2	2	2	2	0	2	2	0	0	2	0	2	2	2	2	0	0	0	0
wsnp_CAP11_c1506_840951	2	0	0	0	2	0	2	0	0	2	0	2	0	2	0	0	0	2	0	2	2	2	2	2	2	0	2	0	0	0	2	2	2	2	0	2	2	0	0	2	0	2	2	2	2	0	0	0	0
BS00022753_51	2	0	0	0	2	0	2	0	0	2	0	2	0	2	0	0	0	2	0	2	2	2	2	2	2	0	2	0	0	0	2	2	2	2	0	2	2	0	0	2	0	2	2	2	2	0	0	0	0
BS00022754_51	2	0	0	0	2	0	2	0	0	2	0	2	0	2	0	0	0	2	0	2	2	2	2	2	2	0	2	0	0	0	2	2	2	2	0	2	2	0	0	2	0	2	2	2	2	0	0	0	0
BS00063973_51	2	0	0	0	2	0	2	0	0	2	0	2	0	2	0	0	0	2	0	2	2	2	2	2	2	0	2	0	0	0	2	2	2	2	0	2	2	0	0	-1	0	2	2	2	2	0	0	0	0
BS00074855_51	2	0	0	0	2	0	2	0	0	2	0	2	0	-1	0	0	0	2	0	2	2	2	2	2	2	0	2	0	0	0	2	2	2	2	0	2	2	0	0	-1	0	2	2	2	2	0	0	0	0
Excalibur_c99584_170	2	0	0	0	2	0	2	0	0	2	0	2	0	2	0	0	0	2	0	2	2	2	2	2	2	0	2	0	0	0	2	2	2	2	0	2	2	0	0	2	0	2	2	2	2	0	0	0	0
wsnp_Ku_c42416_50159250	2	0	0	0	2	0	2	0	0	2	0	2	0	2	0	0	0	2	0	2	2	2	2	2	2	0	2	0	0	0	2	2	2	2	0	2	2	0	0	2	0	2	2	2	2	0	0	0	0
BobWhite_c14689_172	0	0	0	0	2	0	2	0	0	2	0	2	0	2	0	0	0	2	0	2	2	2	2	2	2	0	2	0	0	0	2	2	2	2	0	0	2	0	0	2	0	2	2	2	2	0	0	0	0
D_contig04922_546	0	0	0	0	2	0	2	0	0	2	0	2	0	2	0	0	0	2	0	2	2	2	2	2	2	0	2	0	0	0	2	2	2	2	0	0	2	0	0	2	0	2	2	2	2	0	0	0	0
IAAV8042	0	0	0	0	2	0	2	0	0	2	0	2	0	2	0	0	0	2	0	2	2	2	2	2	2	0	2	0	0	0	2	2	2	2	0	0	2	0	0	2	0	2	2	2	2	0	0	0	0
Ku_c21235_676	0	0	0	0	2	0	2	0	0	2	0	2	0	2	0	0	0	2	0	2	2	2	2	2	2	0	2	0	0	0	2	2	2	2	0	0	2	0	0	2	0	2	2	2	2	0	0	0	0
RAC875_c40928_60	0	0	0	0	2	0	2	0	-1	2	0	2	0	2	0	0	0	2	0	2	2	2	2	2	2	0	2	0	0	0	2	2	2	2	0	0	2	0	0	2	0	2	2	2	2	0	0	0	0
wsnp_Ex_c3772_6866645	0	0	0	0	2	0	2	0	0	2	0	2	0	2	0	0	0	2	0	2	2	2	2	2	2	0	2	0	0	0	2	2	2	2	0	0	2	0	0	2	0	2	2	2	2	0	0	0	0
Ku_c5215_1361	0	0	0	0	2	0	2	0	0	2	0	2	0	2	0	0	0	2	0	2	2	2	2	2	2	0	2	0	0	0	2	2	2	2	0	0	2	0	0	2	0	2	2	2	2	0	0	0	0
wsnp_Ex_c2526_4715978	0	0	0	0	2	0	2	0	-1	2	0	2	0	2	0	0	0	2	0	2	2	2	2	2	2	0	2	0	0	0	2	2	2	2	0	0	2	0	0	2	0	2	2	2	2	0	0	0	0
wsnp_Ex_c31672_40435001	0	0	0	-1	2	0	2	0	0	2	0	2	0	2	0	0	0	2	0	2	2	2	2	2	2	0	2	0	0	0	2	2	2	2	0	0	2	0	0	2	0	2	2	2	2	0	0	0	0
Kukri_c28555_114	0	0	0	0	2	0	2	0	-1	0	0	2	0	-1	0	0	0	2	0	2	0	0	2	0	2	0	2	0	0	2	2	2	2	2	0	0	2	0	0	2	0	2	2	2	2	0	0	0	0
wsnp_Ku_c18023_27232712	2	0	0	0	0	0	2	0	0	2	2	2	0	0	0	0	0	2	2	2	0	0	2	0	2	0	2	0	2	0	2	0	2	2	0	0	0	0	2	0	0	0	-1	2	2	0	0	2	0
BS00067351_51	2	0	0	0	0	0	2	0	-1	2	2	2	0	0	-1	0	0	2	2	2	0	0	2	0	2	0	2	0	2	0	2	0	2	2	0	0	0	0	2	0	0	0	-1	2	2	0	0	2	0
Kukri_rep_c91370_381	2	0	0	0	0	0	2	0	0	2	2	2	0	0	0	0	0	2	2	2	0	0	2	0	2	0	2	0	2	0	2	0	2	2	0	0	0	0	2	0	0	0	0	2	2	0	0	2	0
wsnp_Ra_c3095_5835193	2	0	0	0	0	0	2	0	0	2	2	2	0	0	0	0	0	2	2	2	0	0	2	0	2	0	2	0	2	0	2	0	2	2	0	0	0	0	2	0	0	0	0	2	2	0	0	2	0
BS00055102_51	2	0	0	0	0	0	2	0	-1	2	2	2	0	0	-1	0	0	2	2	2	0	0	2	0	2	0	2	0	2	0	2	0	2	2	0	0	0	0	2	0	0	0	-1	2	2	0	0	2	0
BS00063793_51	2	0	0	0	0	0	2	0	-1	2	2	2	0	0	-1	0	0	2	2	2	0	0	2	0	2	0	2	0	2	0	2	0	2	2	0	0	0	0	2	0	0	0	-1	2	2	0	0	2	0
BS00065915_51	2	0	0	0	0	0	2	0	0	2	2	2	0	0	0	0	0	2	2	2	0	0	2	0	2	0	2	0	2	0	2	0	2	2	0	0	0	0	2	0	0	0	0	2	2	0	0	2	0
Kukri_c18023_553	2	0	0	0	0	0	2	0	0	2	2	2	0	0	-1	0	0	2	2	2	0	0	2	0	2	0	2	0	2	0	2	0	2	2	0	0	0	0	2	0	0	0	-1	2	2	0	0	2	0
wsnp_Ex_c2441_4568016	2	0	0	0	0	0	2	0	0	2	2	2	0	0	-1	0	0	2	2	2	0	0	2	0	2	0	2	0	2	0	2	0	2	2	0	0	0	0	2	0	0	0	-1	2	2	0	0	2	0
D_contig11267_712	2	0	0	0	0	0	2	0	0	2	2	2	0	0	0	0	0	2	2	2	0	0	2	0	2	0	2	0	2	0	2	0	2	2	0	0	0	0	2	0	0	0	0	2	2	0	0	2	0
RAC875_c47328_483	2	0	0	0	0	0	2	0	0	2	2	2	0	0	0	0	0	2	2	2	0	0	2	0	2	0	2	0	2	0	2	0	2	2	0	0	0	0	2	0	0	0	-1	2	2	0	0	2	0
BS00022838_51	2	0	0	0	2	2	2	0	0	2	2	2	0	-1	-1	0	0	2	2	2	0	0	2	0	2	0	2	0	2	2	2	2	2	2	0	0	0	0	2	0	0	0	-1	-1	0	0	2	2	2
BobWhite_rep_c63332_67	2	0	0	0	2	2	2	0	0	2	2	2	0	-1	-1	0	0	2	2	2	0	0	2	0	2	0	2	0	2	2	2	2	2	2	0	0	0	0	2	0	0	0	-1	-1	0	0	2	2	2
CAP8_c3064_95	2	0	0	0	2	2	2	0	0	2	2	2	0	0	0	0	0	2	2	2	0	0	2	0	2	0	2	0	2	2	2	2	2	2	0	0	0	0	2	0	0	0	0	-1	0	0	2	2	2
Ra_c10380_534	2	0	0	0	2	2	-1	0	0	2	2	2	0	0	0	0	0	2	2	2	0	0	2	0	2	0	2	0	2	2	2	2	2	2	0	0	0	0	2	0	0	0	0	0	0	0	2	2	-1
Tdurum_contig42962_2138	2	0	0	0	2	2	2	0	0	2	2	2	0	-1	-1	0	0	2	2	2	0	0	2	0	2	0	2	0	2	2	2	2	2	2	0	0	0	0	2	0	0	0	-1	-1	0	0	2	0	2
BobWhite_rep_c50013_65	2	0	0	0	2	2	2	0	0	2	2	2	0	-1	-1	0	0	2	2	2	0	0	2	0	2	0	2	0	2	2	2	2	2	2	0	0	0	0	2	0	0	0	-1	-1	0	0	2	0	2
BobWhite_c8906_83	2	0	0	0	2	2	2	0	0	2	2	2	0	-1	-1	0	0	2	2	2	0	0	2	0	2	0	2	0	2	2	2	2	2	2	0	0	0	0	2	0	0	0	-1	2	0	0	2	0	2
BobWhite_rep_c57286_122	2	0	0	0	2	2	2	0	0	2	2	2	0	2	-1	0	0	-1	2	2	0	0	2	0	2	0	2	0	2	2	2	2	2	2	0	0	0	0	2	0	0	0	0	2	0	0	2	0	2
Kukri_c75091_154	2	0	0	0	2	2	2	0	0	2	2	2	0	0	0	0	0	2	2	2	0	0	2	0	2	0	2	0	2	2	2	2	2	2	0	0	0	0	2	0	0	0	2	2	0	0	2	0	2
Kukri_c75091_220	2	0	0	0	2	2	2	0	0	2	2	2	0	-1	-1	0	0	2	2	2	0	0	2	0	2	0	2	0	2	2	2	2	2	2	0	0	0	0	2	0	0	0	-1	-1	0	0	2	0	2
RAC875_c32639_395	2	0	0	0	2	2	2	0	0	2	2	2	0	-1	-1	0	0	2	2	2	0	0	2	0	2	0	2	0	2	2	2	2	2	2	0	0	0	0	2	0	0	0	-1	-1	0	0	2	0	2
wsnp_Ex_c23795_33033010	2	0	0	0	2	2	2	0	0	2	2	2	0	-1	-1	0	0	2	2	2	0	0	2	0	2	0	2	0	2	2	2	2	2	2	0	0	0	0	2	0	0	0	-1	-1	0	0	2	0	2
wsnp_Ex_c23795_33033150	2	0	0	0	2	2	2	0	0	2	2	2	0	-1	-1	0	0	2	2	2	0	0	2	0	2	0	2	0	2	2	2	2	2	2	0	0	0	0	2	0	0	0	-1	-1	0	0	2	0	2
wsnp_Ex_c23795_33033959	2	0	0	0	2	2	2	0	0	2	2	2	0	-1	-1	0	0	2	2	2	0	0	2	0	2	0	2	0	2	2	2	2	2	2	0	0	0	0	2	0	0	0	-1	-1	0	0	2	0	2
wsnp_Ex_c26968_36188964	2	0	0	0	2	2	2	0	0	2	2	2	0	0	0	0	0	2	2	2	0	0	2	0	2	0	2	0	2	2	2	2	2	2	0	0	0	0	2	0	0	0	0	-1	0	0	2	0	2
wsnp_Ku_rep_c71232_70948744	2	0	0	0	2	2	2	0	0	2	2	2	0	-1	-1	0	0	2	2	2	0	0	2	0	2	0	2	0	2	2	2	2	2	2	0	0	0	0	2	0	0	0	-1	-1	0	0	2	0	2
Excalibur_c1954_930	2	0	0	0	2	2	2	0	0	2	2	2	0	-1	-1	0	0	2	2	2	0	0	2	0	2	0	2	2	2	2	2	2	2	2	0	0	0	0	2	0	2	0	-1	-1	0	0	2	0	2
IAAV3916	2	-1	0	0	2	2	2	0	0	2	2	2	0	0	-1	0	0	2	2	2	0	0	2	0	2	0	2	2	2	0	2	2	2	2	0	0	0	0	2	2	2	0	-1	-1	0	0	2	0	2
RAC875_c54693_298	2	2	0	0	2	2	2	0	0	2	2	2	0	0	0	0	0	2	2	2	0	0	2	0	2	0	2	2	2	2	2	2	2	2	0	0	0	0	2	2	2	0	0	2	0	0	2	0	2
Excalibur_c32414_705	2	-1	0	0	2	2	2	0	0	2	2	2	0	0	0	0	0	2	2	2	0	0	2	0	2	0	2	2	2	2	2	2	2	2	0	0	0	0	2	2	2	0	0	2	0	0	2	0	2
wsnp_Ra_c25624_35192195	2	-1	0	0	2	2	2	0	0	2	2	2	0	0	-1	0	0	2	2	2	0	0	2	0	2	0	2	2	2	2	2	2	2	2	0	0	0	0	2	2	2	0	-1	-1	0	0	2	0	2
wsnp_Ex_c3136_5798236	2	2	0	0	2	2	2	0	0	-1	2	2	0	-1	-1	0	0	2	2	2	0	0	2	0	2	0	2	2	2	0	2	2	2	2	0	0	0	0	2	2	2	0	-1	-1	0	0	2	0	2
Ku_c19516_384	2	-1	0	0	2	2	2	0	0	2	2	2	0	0	-1	0	0	2	2	2	0	0	2	0	2	0	2	-1	2	2	2	2	2	2	0	0	0	0	2	2	2	0	-1	-1	0	0	2	0	2
wsnp_CAP11_c1116_654940	2	-1	0	0	2	2	2	0	0	2	2	2	0	0	-1	0	0	2	2	2	0	0	2	0	2	0	2	2	2	2	2	2	2	2	0	0	0	0	2	2	2	0	-1	-1	0	0	2	0	2
wsnp_Ex_c2505_4679749	2	-1	0	0	2	2	2	0	0	2	2	2	0	0	-1	0	0	2	2	2	0	0	2	0	2	0	2	-1	2	0	2	2	2	2	0	0	0	0	2	2	2	0	-1	-1	0	0	2	0	2
BS00020605_51	2	-1	0	0	0	2	2	0	0	2	2	0	0	-1	-1	0	0	2	2	2	0	0	2	0	2	0	2	0	2	2	2	2	2	2	2	0	0	0	2	2	2	0	-1	-1	0	0	2	0	2
BobWhite_c11539_336	2	2	0	0	0	2	2	2	0	2	2	0	0	0	2	0	2	2	2	2	0	0	2	0	2	2	2	2	2	2	2	2	2	2	2	2	0	2	2	0	2	0	0	2	0	0	2	0	2
GENE-2673_1010	2	-1	0	0	0	2	2	2	0	2	2	0	0	0	-1	0	2	2	2	2	0	0	2	0	2	2	2	2	2	2	2	2	2	2	2	2	0	2	2	0	2	0	0	-1	0	0	2	0	2
Excalibur_c2171_2728	2	-1	0	0	0	2	2	2	0	2	2	0	0	0	-1	0	2	2	2	2	0	0	2	0	2	2	2	2	2	2	2	2	2	2	2	2	0	2	2	0	2	0	0	-1	0	0	2	0	2
Kukri_rep_c86966_163	2	2	0	0	0	2	2	2	0	2	2	0	0	0	2	0	2	2	2	2	0	0	2	0	2	2	2	2	2	2	2	2	2	2	2	2	0	2	2	0	2	0	0	2	0	0	2	0	2
BobWhite_c47401_491	2	2	0	0	0	2	2	2	0	2	2	0	0	0	-1	0	2	2	2	2	0	0	2	0	2	2	2	2	2	2	2	2	2	2	2	2	0	2	2	0	2	0	0	-1	0	0	2	0	2
BS00000006_51	2	2	0	0	0	2	2	2	0	2	2	0	0	0	2	0	2	2	2	2	0	0	2	0	2	2	2	2	2	2	2	2	2	2	2	2	0	2	2	0	2	0	0	2	0	0	2	0	2
wsnp_Ex_c20899_30011827	2	-1	0	0	0	2	2	2	0	2	2	0	0	0	-1	0	2	2	2	2	0	0	2	0	2	2	2	2	2	2	2	2	2	2	2	2	0	2	2	0	2	0	0	-1	0	0	2	0	2
wsnp_Ex_c2171_4072774	2	-1	0	0	0	2	2	2	0	2	2	0	0	0	-1	0	2	2	2	2	0	0	2	0	2	2	2	2	2	2	2	2	2	2	2	2	0	2	2	0	2	0	0	-1	0	0	2	0	2
wsnp_Ex_c2171_4072995	2	-1	0	0	0	2	2	2	0	2	2	0	0	0	-1	0	2	2	2	2	0	0	2	0	2	2	2	2	2	2	2	2	2	2	2	2	0	2	2	0	2	0	0	-1	0	0	2	0	2
wsnp_Ex_c2171_4073721	2	-1	0	0	0	2	2	2	0	2	2	0	0	0	-1	0	2	2	2	2	0	0	2	0	2	2	2	2	2	2	2	2	2	2	2	2	0	2	2	0	2	0	0	-1	0	0	2	0	2
wsnp_Ex_c2171_4074003	2	-1	0	0	0	2	2	2	0	2	2	0	0	0	-1	0	2	2	2	2	0	0	2	0	2	2	2	2	2	2	2	2	2	2	2	2	0	2	2	0	2	0	0	-1	0	0	2	0	2
Ra_c69221_1167	2	0	2	0	2	2	2	2	2	0	2	0	2	-1	0	0	2	2	2	2	2	2	2	0	2	0	2	0	2	0	2	2	0	2	2	0	2	0	0	0	0	2	2	2	0	0	0	0	0
wsnp_Ex_c28827_37918346	2	0	2	0	2	2	2	2	2	0	2	0	2	-1	0	0	2	2	2	2	2	2	2	0	2	0	2	0	2	0	2	2	0	2	2	0	2	0	0	0	0	2	2	2	0	0	0	0	0
wsnp_JD_rep_c61843_39601402	2	0	2	0	2	2	2	2	2	0	2	0	2	2	0	0	2	2	2	2	2	2	2	0	2	0	2	0	2	0	2	2	0	2	2	0	2	0	0	0	0	2	2	2	0	0	0	0	0
Kukri_c60091_331	2	0	2	-1	2	2	2	2	2	0	2	0	2	0	0	0	2	2	2	2	2	2	2	0	2	0	2	0	2	0	2	2	0	2	2	0	2	0	0	0	0	2	2	2	0	0	0	0	0
wsnp_Ra_rep_c69221_66574148	2	-1	2	0	2	2	2	2	2	0	2	0	2	-1	0	0	2	2	2	2	2	2	2	0	2	0	2	0	2	0	2	2	0	2	2	0	2	0	0	0	0	2	2	-1	0	0	0	0	0
Ku_c102710_1055	2	2	2	0	2	2	2	2	2	0	2	0	2	0	0	0	2	2	2	2	2	2	2	0	2	0	2	0	2	0	2	2	0	2	2	0	2	0	0	0	0	2	2	2	0	0	0	0	0
BobWhite_c15454_63	2	0	2	0	2	2	2	2	2	2	2	0	2	-1	0	0	2	2	2	2	2	2	2	0	2	0	2	0	2	0	2	0	0	2	2	0	2	0	0	0	0	0	-1	2	0	0	0	2	0
CAP12_c667_143	2	0	2	0	2	2	2	2	2	2	2	0	2	-1	0	0	2	2	2	2	2	2	2	0	2	0	2	0	2	0	2	0	0	2	2	0	2	0	0	0	0	0	-1	-1	0	0	0	2	0
Kukri_c42466_392	2	0	2	0	2	2	2	2	2	2	2	0	2	0	0	0	2	2	2	2	2	2	2	0	2	0	2	0	2	0	2	0	0	2	2	0	2	0	0	0	0	0	2	2	0	0	0	2	0
TA003225-1427	2	0	2	0	2	2	2	2	2	2	2	0	2	0	0	0	2	2	2	2	2	2	2	0	2	0	2	0	2	0	2	0	0	2	2	0	2	0	0	0	0	0	2	2	0	0	0	2	0
TA004818-0715	2	0	2	0	2	2	2	2	2	2	2	0	2	0	0	0	2	2	2	2	2	2	2	0	2	0	2	0	2	0	2	0	0	2	2	0	2	0	0	0	0	0	-1	-1	0	0	0	2	0
Tdurum_contig45240_1309	2	0	2	0	2	2	2	2	2	2	2	0	2	-1	0	0	2	2	2	2	2	2	2	0	2	0	2	0	2	0	2	0	0	2	2	0	2	0	0	0	0	0	-1	-1	0	0	0	2	0
wsnp_Ex_rep_c68515_67349716	2	0	2	0	2	2	2	2	2	2	2	0	2	0	0	0	2	2	2	2	2	2	2	0	2	0	2	0	2	0	2	0	0	2	2	0	2	0	0	0	0	0	2	2	0	0	0	2	0
BS00034303_51	2	0	2	0	2	2	2	2	2	2	2	0	2	-1	0	0	2	2	2	2	2	2	2	0	2	0	2	0	2	0	2	0	0	2	2	0	2	0	0	0	0	0	-1	-1	0	0	0	2	0
BS00034304_51	2	0	2	0	2	2	2	2	2	2	2	0	2	-1	0	0	2	2	2	2	2	2	2	0	2	0	2	0	2	0	2	0	0	2	2	0	2	0	0	0	0	0	-1	-1	0	0	0	2	0
BS00062427_51	2	0	2	0	2	2	2	2	2	2	2	0	2	-1	0	0	2	2	2	2	2	2	2	0	2	0	2	0	2	0	2	0	0	2	2	0	2	0	0	0	0	0	-1	-1	0	0	0	2	0
BS00063425_51	2	0	2	0	2	2	2	2	2	2	2	0	2	-1	0	0	2	2	2	2	2	2	2	0	2	0	2	0	2	0	2	0	0	2	2	0	2	0	0	0	0	0	-1	-1	0	0	0	2	0
BS00063822_51	2	0	2	0	2	2	2	2	2	2	2	0	2	-1	0	0	2	2	2	2	2	2	2	0	2	0	2	0	2	0	2	0	0	2	2	0	2	0	0	0	0	0	2	-1	0	0	0	2	0
BS00063823_51	2	0	2	0	2	2	2	2	2	2	2	0	2	-1	0	0	2	2	2	2	2	2	2	0	2	0	2	0	2	0	2	0	0	2	2	0	2	0	0	0	0	0	-1	-1	0	0	0	2	0
BS00070903_51	2	0	2	0	2	2	2	2	2	2	2	0	2	-1	0	0	2	2	2	2	2	2	2	0	2	0	2	0	2	0	2	0	0	2	2	0	2	0	0	0	0	0	-1	-1	0	0	0	2	0
Ku_c21587_754	2	0	2	0	2	2	2	2	2	2	2	0	2	-1	0	0	2	2	2	2	2	2	2	0	2	0	2	0	2	0	2	0	0	2	2	0	2	0	0	0	0	0	-1	-1	0	0	0	2	0
Ra_c144_1023	2	0	2	0	2	2	2	2	2	2	2	0	2	0	0	0	2	2	2	2	2	2	2	0	2	0	2	0	2	0	2	0	0	2	2	0	2	0	0	0	0	0	2	2	0	0	0	2	0
Ra_c33743_472	2	0	2	0	2	2	2	2	2	2	2	0	2	-1	0	0	2	2	2	2	2	2	2	0	2	0	2	0	2	0	2	0	0	2	2	0	2	0	0	0	0	0	-1	-1	0	0	0	2	0
RAC875_c13_1458	2	0	2	0	2	2	2	2	2	2	2	0	2	0	0	0	2	-1	2	2	2	2	2	0	2	0	2	0	2	0	2	0	0	2	2	0	2	0	0	0	0	0	2	2	0	0	0	2	0
RAC875_c13_1589	2	0	2	0	2	2	2	2	2	2	2	0	2	2	0	0	2	2	2	2	2	2	2	0	2	0	2	0	2	0	2	0	0	2	2	0	2	0	0	0	0	0	2	2	0	0	0	2	0
RAC875_c13_1965	2	0	2	0	2	2	2	2	2	2	2	0	2	-1	0	0	2	2	2	2	2	2	2	0	2	0	2	0	2	0	2	0	0	2	2	0	2	0	0	0	0	0	-1	-1	0	0	0	2	0
RAC875_c13_2330	2	0	2	0	2	2	2	2	2	2	2	0	2	0	0	0	2	2	2	2	2	2	2	0	2	0	2	0	2	0	2	0	0	2	2	0	2	0	0	0	0	0	2	2	0	0	0	2	0
TA003225-0566	2	0	2	0	2	2	2	2	2	2	2	0	2	-1	0	0	2	2	2	2	2	2	2	0	2	0	2	0	2	0	2	0	0	2	2	0	2	0	0	0	0	0	-1	-1	0	0	0	2	0
Tdurum_contig49844_958	2	0	2	0	2	2	2	2	2	2	2	0	2	0	0	0	2	2	2	2	2	2	2	0	2	0	2	0	2	0	2	0	0	2	2	0	2	0	0	0	0	0	-1	-1	0	0	0	2	0
tplb0031i04_452	2	0	2	0	2	2	2	2	2	2	2	0	2	0	0	0	2	2	2	2	2	2	2	0	2	0	2	0	2	0	2	0	0	2	2	0	2	0	0	0	0	0	-1	-1	0	0	0	2	0
wsnp_Ex_c4666_8349206	2	0	2	0	2	2	2	2	2	2	2	0	2	0	0	0	2	2	2	2	2	2	2	0	2	0	2	0	2	0	2	0	0	2	2	0	2	0	0	0	0	0	2	-1	0	0	0	2	0
wsnp_Ex_rep_c68515_67349904	2	0	2	0	2	2	2	2	2	2	2	0	2	0	0	0	2	2	2	2	2	2	2	0	2	0	2	0	2	0	2	0	0	2	2	0	2	0	0	0	0	0	-1	-1	0	0	0	2	0
wsnp_Ex_rep_c72507_70869798	2	0	2	0	2	2	2	2	2	2	2	0	2	-1	0	0	2	2	2	2	2	2	2	0	2	0	2	0	2	0	2	0	0	2	2	0	2	0	0	0	0	0	-1	-1	0	0	0	2	0
wsnp_Ra_c13_24540	2	0	2	0	2	2	2	2	2	2	2	0	2	-1	0	0	2	2	2	2	2	2	2	0	2	0	2	0	2	0	2	0	0	2	2	0	2	0	0	0	0	0	2	-1	0	0	0	2	0
TA002230-0886	2	0	2	0	2	2	2	2	2	2	2	0	2	0	0	0	2	2	2	2	2	2	2	0	2	0	2	0	2	0	2	0	0	2	2	0	2	0	0	0	0	0	2	2	0	0	0	2	0
Kukri_c31786_657	2	0	2	0	2	2	2	2	2	2	2	0	2	-1	0	0	2	2	2	2	2	2	2	0	2	0	2	0	2	0	2	0	0	2	2	0	2	0	0	0	0	0	-1	-1	0	0	0	2	0
RAC875_rep_c73524_82	2	0	2	0	2	2	2	2	2	2	2	0	2	0	0	0	2	2	2	2	2	2	2	0	2	0	2	0	2	0	2	0	0	2	2	0	2	0	0	0	0	0	-1	-1	0	0	0	2	0
wsnp_Ex_c12440_19836844	2	0	2	0	2	2	2	2	2	2	2	0	2	-1	0	0	2	2	2	2	2	2	2	0	2	0	2	0	2	0	2	0	0	2	2	0	2	0	0	0	0	0	-1	-1	0	0	0	2	0
wsnp_Ex_rep_c113621_94394656	2	0	2	0	2	2	2	2	2	2	2	0	2	2	0	0	2	2	2	2	2	2	2	0	2	0	2	0	2	0	2	0	0	2	2	0	2	0	0	0	0	0	2	2	0	0	0	2	0
wsnp_Ex_rep_c70343_69286072	2	0	2	0	2	2	2	2	2	2	2	0	2	0	0	0	2	2	2	2	2	2	2	0	2	0	2	0	2	0	2	0	0	2	2	0	2	0	0	0	0	0	-1	-1	0	0	0	2	0
wsnp_Ex_rep_c70343_69286263	2	0	2	0	2	2	2	2	2	2	2	0	2	0	0	0	2	2	2	2	2	2	2	0	2	0	2	0	2	0	2	0	0	2	2	0	2	0	0	0	0	0	2	2	0	0	0	2	0
BS00022683_51	2	0	2	0	2	2	2	2	2	2	2	0	2	0	0	0	2	2	2	2	2	2	2	0	2	0	2	0	2	0	2	0	0	2	2	0	2	0	0	0	0	0	-1	-1	0	0	2	2	0
BS00046529_51	2	0	2	0	2	2	2	2	2	2	2	0	2	0	0	0	2	2	2	2	2	2	2	0	2	0	2	0	2	0	2	0	0	2	2	0	2	0	0	0	0	0	-1	-1	0	0	2	2	0
Tdurum_contig5481_252	2	0	2	0	2	2	2	2	2	2	2	0	2	0	0	0	2	2	2	2	2	2	2	0	2	0	2	0	2	0	2	0	0	2	2	0	2	0	0	0	0	0	-1	-1	0	0	2	2	0
BobWhite_c17440_130	2	0	2	0	2	2	2	2	2	2	2	0	2	-1	0	0	2	2	2	2	2	2	2	0	2	0	2	2	2	0	2	0	0	2	0	2	2	0	0	0	2	0	-1	-1	0	0	2	2	0
Excalibur_c65171_418	2	0	2	0	2	2	2	2	2	2	2	0	2	0	0	0	2	2	2	2	2	2	2	0	2	0	2	2	2	0	2	0	0	2	0	2	2	0	0	0	2	0	2	2	0	0	2	2	0
Kukri_c5501_1515	2	0	2	0	2	2	2	2	2	2	2	0	2	0	0	0	2	2	2	2	2	2	2	0	2	0	2	2	2	0	2	0	2	2	0	2	2	0	0	0	2	0	2	-1	0	0	2	2	0
BS00022500_51	2	0	2	0	2	2	2	2	2	2	2	0	2	0	0	0	2	2	2	2	2	2	2	0	2	0	2	2	2	0	2	0	2	2	0	2	2	0	0	0	2	0	-1	-1	0	0	2	2	0
Excalibur_c7180_862	2	0	2	0	2	2	2	2	2	2	2	0	2	0	0	0	2	2	2	2	2	2	2	0	2	0	2	2	2	0	2	0	2	2	0	2	2	0	0	0	2	0	2	-1	0	0	2	2	0
Excalibur_c22052_303	2	0	2	0	2	2	2	2	2	2	2	0	2	0	0	0	2	2	2	2	0	0	2	0	2	0	2	2	2	0	2	0	2	2	0	2	2	0	0	0	2	0	2	2	0	0	2	2	0
BS00022003_51	2	0	2	0	2	2	2	2	2	2	2	0	2	2	0	0	2	2	2	2	0	0	2	0	2	0	2	2	2	0	2	0	2	2	0	2	2	0	0	0	2	-1	-1	2	0	0	2	2	0
Tdurum_contig102312_245	2	0	2	0	2	2	2	2	2	2	2	-1	2	2	0	0	2	2	2	2	0	0	2	0	2	0	2	2	2	0	2	0	2	2	0	2	2	0	0	0	2	-1	2	2	0	0	2	2	0
BobWhite_c14705_487	2	0	2	0	2	2	2	2	2	2	2	0	2	-1	0	0	2	2	2	2	0	0	2	0	2	0	2	2	2	0	2	0	2	2	0	2	2	0	0	0	2	0	2	2	0	0	2	2	0
Tdurum_contig48766_257	2	0	2	0	2	2	2	2	2	2	2	0	2	2	0	0	2	2	2	2	0	0	2	0	2	0	2	2	2	0	2	0	2	2	0	2	2	0	0	0	2	0	2	-1	0	0	2	2	0
wsnp_Ex_rep_c68441_67261679	2	0	2	0	2	2	2	2	2	2	2	0	2	2	0	0	2	2	2	2	0	0	2	0	2	0	2	2	2	0	2	0	2	2	0	2	2	0	0	0	2	0	2	2	0	0	2	2	0
RAC875_c4033_192	2	0	2	0	2	2	2	2	2	2	2	0	2	2	0	0	2	2	2	2	0	0	2	0	2	0	2	2	2	2	2	0	2	2	0	2	2	0	0	0	2	0	-1	-1	0	0	2	2	0
BS00034704_51	2	0	2	0	2	2	2	2	2	2	2	0	2	2	0	0	2	2	2	2	0	0	2	0	2	0	2	2	2	2	2	0	2	2	0	2	2	0	0	0	2	0	2	2	0	0	2	2	0
GENE-3583_319	2	0	2	0	2	2	2	2	2	2	2	0	2	0	0	0	2	2	2	2	0	0	2	0	2	0	2	2	2	2	2	0	2	2	0	2	2	0	0	0	2	0	-1	-1	0	0	2	2	0
Kukri_c27691_226	2	0	2	0	2	2	2	2	2	2	2	0	2	0	0	0	2	2	2	2	0	0	2	0	2	0	2	2	2	2	2	0	2	2	0	2	2	0	0	0	2	0	-1	-1	0	0	2	2	0
RAC875_c7794_542	2	0	2	0	2	2	2	2	2	2	2	0	2	0	0	0	2	2	2	2	0	0	2	0	2	0	2	2	2	2	2	0	2	2	0	2	2	0	0	0	2	0	2	2	0	0	2	2	0
RAC875_c95309_460	2	0	2	0	2	2	2	2	2	2	2	0	2	-1	0	0	2	2	2	2	0	0	2	0	2	0	2	2	2	2	2	0	2	2	0	2	2	0	0	0	2	0	-1	-1	0	0	2	2	0
BS00065693_51	2	0	2	0	2	2	2	2	2	2	2	0	2	-1	0	0	2	2	2	2	0	0	2	0	2	0	2	2	2	2	2	0	2	2	0	2	2	0	0	0	2	0	-1	-1	0	0	2	2	0
BS00066569_51	2	0	2	0	2	2	2	2	2	2	2	0	2	0	0	0	2	2	2	2	0	0	2	0	2	0	2	2	2	2	2	0	2	2	0	2	2	0	0	0	2	0	-1	-1	0	0	2	2	0
IAAV3512	2	0	2	0	2	2	2	2	2	2	2	0	2	0	0	0	2	2	2	2	0	0	2	0	2	0	2	2	2	2	2	0	2	2	0	2	2	0	0	0	2	0	2	-1	0	0	2	2	0
IAAV9057	2	0	2	0	2	2	2	2	2	2	2	0	2	-1	0	0	2	2	2	2	0	0	2	0	2	0	2	2	2	2	2	0	2	2	0	2	2	0	0	0	2	0	-1	-1	0	0	2	2	0
Kukri_c45983_524	2	0	2	0	2	2	2	2	2	2	2	0	2	-1	0	0	2	2	2	2	0	0	2	0	2	0	2	2	2	2	2	0	2	2	0	2	2	0	0	0	2	0	-1	-1	0	0	2	2	0
Kukri_c7633_724	2	0	2	0	2	2	2	2	2	2	2	0	2	0	0	0	2	2	2	2	0	0	2	0	2	0	2	2	2	2	2	0	2	2	0	2	2	0	0	0	2	0	2	2	0	0	2	2	0
wsnp_JD_c1796_2496653	2	0	2	0	2	2	2	2	2	2	2	0	2	-1	0	0	2	2	2	2	0	0	2	0	2	0	2	2	2	2	2	0	2	2	0	2	2	0	0	0	2	0	-1	-1	0	0	2	2	0
BS00021939_51	2	0	2	0	2	2	2	2	2	2	2	0	2	0	0	0	2	2	2	2	0	0	2	0	2	0	2	2	2	0	2	0	2	2	0	2	2	0	0	0	2	0	-1	-1	0	0	2	2	0
BS00005311_51	2	0	2	0	2	2	2	2	2	2	2	0	2	0	0	0	2	2	2	2	0	0	2	0	2	0	2	2	2	0	2	0	2	2	0	2	2	0	0	0	2	0	-1	-1	0	0	2	2	0
BS00076256_51	2	0	2	0	2	2	2	2	2	2	2	0	2	0	0	0	2	2	2	2	0	0	2	0	2	0	2	2	2	0	2	0	2	2	0	2	2	0	0	0	2	0	-1	-1	0	0	2	2	0
tplb0039m09_92	2	0	2	0	2	2	2	2	2	2	2	0	2	0	0	0	2	2	2	2	0	0	2	0	2	0	2	2	2	0	2	0	2	2	0	2	2	0	0	0	2	0	2	-1	0	0	2	2	0
wsnp_Ku_c30743_40542247	2	0	2	0	2	2	2	2	2	2	2	0	2	0	0	0	2	2	2	2	0	0	2	0	2	0	2	2	2	0	2	0	2	2	0	2	2	0	0	0	2	0	-1	-1	0	0	2	2	0
BobWhite_c2236_111	2	0	2	0	2	2	2	2	2	2	2	2	2	-1	0	0	2	2	2	2	0	0	2	0	2	0	2	2	2	0	2	0	2	2	0	2	2	0	0	0	2	0	-1	-1	0	0	2	2	0
BS00109052_51	2	0	2	0	2	2	2	2	2	2	2	2	2	-1	0	0	2	2	2	2	0	0	2	0	2	0	2	2	2	0	2	0	2	2	0	2	2	0	0	0	2	0	-1	-1	0	0	2	2	0
Tdurum_contig4731_1108	2	0	2	0	2	2	2	2	2	2	2	2	2	-1	0	0	2	2	2	2	0	0	2	0	2	0	2	2	2	0	2	0	2	2	0	2	2	0	0	0	2	0	-1	-1	0	0	2	2	0
Tdurum_contig62767_426	2	0	2	0	2	2	2	2	2	2	2	2	2	-1	0	0	2	2	2	2	0	0	2	0	2	0	2	2	2	0	2	0	0	2	0	2	2	0	0	0	2	0	-1	-1	0	0	2	2	0
BS00000615_51	2	0	2	0	2	2	2	2	2	2	2	2	2	0	0	0	2	2	2	2	0	0	2	0	2	0	2	2	2	0	2	0	0	2	0	2	2	0	0	0	2	0	2	2	0	0	2	2	0
BS00076190_51	2	0	2	0	2	2	2	2	2	2	2	2	2	-1	0	0	2	2	2	2	0	0	2	0	2	0	2	2	2	0	2	0	0	2	-1	2	2	0	0	0	2	0	-1	-1	0	0	2	2	0
wsnp_Ex_rep_c67292_65834396	2	0	2	0	2	2	2	2	2	2	2	2	2	-1	0	0	2	2	2	2	0	0	2	0	2	0	2	2	2	0	2	0	0	2	0	2	2	0	0	0	2	0	-1	-1	0	0	2	2	0
Excalibur_c24638_380	2	0	2	0	2	2	2	2	2	2	2	2	2	-1	0	0	2	2	2	2	0	0	2	0	2	0	2	2	2	0	2	0	0	2	0	2	2	0	0	0	2	0	-1	-1	0	0	2	2	0
JD_c64219_207	2	0	2	0	2	2	2	2	2	2	2	2	2	-1	0	0	2	2	2	2	0	0	2	0	2	0	2	2	2	0	2	0	0	2	0	2	2	0	0	0	2	0	2	2	0	0	2	2	0
RAC875_c48455_224	2	0	2	0	2	2	2	2	2	2	2	2	2	-1	0	0	2	2	2	2	0	0	2	0	2	0	2	2	2	0	2	0	0	2	0	2	2	0	0	0	2	0	2	2	0	0	2	2	0
GENE-3101_137	2	0	2	0	2	2	2	2	2	2	2	2	2	2	0	0	2	2	2	2	0	0	2	0	2	0	2	2	2	2	2	0	0	2	0	2	2	0	-1	0	2	0	2	2	0	0	2	2	0
Tdurum_contig43874_1129	2	0	2	0	2	2	2	2	2	2	2	2	2	2	0	0	2	2	2	2	0	0	2	0	2	0	2	2	2	2	2	0	0	2	0	2	2	0	0	0	2	0	2	2	0	0	2	2	0
Excalibur_c6314_91	2	0	2	0	2	2	2	2	2	2	2	2	2	2	0	0	2	2	2	2	0	0	2	0	2	0	2	2	2	2	2	0	0	2	0	2	2	0	0	0	2	0	-1	-1	0	0	2	2	0
Kukri_c2621_610	2	0	2	0	2	2	2	2	2	2	2	2	2	-1	0	0	2	2	2	2	0	0	2	0	2	0	2	2	2	2	2	0	0	2	0	2	2	0	0	0	2	0	-1	-1	0	0	2	2	0
wsnp_Ex_c19647_28632894	2	0	2	0	2	2	2	2	2	2	2	2	2	-1	0	0	2	2	2	2	0	0	2	0	2	0	2	2	2	2	2	0	0	2	0	2	2	0	0	0	2	0	2	-1	0	0	2	2	0
BS00070259_51	2	0	2	0	2	2	2	2	2	2	2	2	2	2	0	0	2	2	2	2	0	0	2	0	2	0	2	2	2	2	2	0	0	2	0	2	2	0	0	0	2	0	2	0	0	0	2	2	0
IAAV2127	2	0	2	0	2	2	2	2	2	2	2	2	2	2	0	0	2	2	2	2	0	0	2	0	2	0	2	2	2	2	2	0	0	2	0	2	2	0	0	0	2	0	-1	-1	0	0	2	2	0
RFL_Contig4500_912	2	0	2	0	2	2	2	2	2	2	2	2	2	2	0	0	2	2	2	2	0	0	2	0	2	0	2	2	2	2	2	0	0	2	0	2	2	0	0	0	2	0	-1	2	0	0	2	2	0
BS00066916_51	2	0	2	0	2	2	2	2	2	2	2	2	2	2	0	0	2	2	2	2	0	0	2	0	2	0	2	2	2	2	2	0	0	2	0	2	2	0	0	0	2	0	2	2	0	0	2	2	0
BS00070260_51	2	0	2	0	2	2	2	2	2	2	2	2	2	-1	0	0	2	2	2	2	0	0	2	0	2	0	2	2	2	-1	2	0	0	2	0	2	2	0	0	0	2	0	-1	-1	0	0	2	2	0
Excalibur_c47264_322	2	0	2	0	2	2	2	2	2	2	2	2	2	-1	0	0	2	2	2	2	0	0	2	0	2	0	2	2	2	-1	2	0	0	2	0	2	2	0	0	0	2	0	-1	-1	0	0	2	2	0
Excalibur_c56861_322	2	0	2	0	2	2	2	2	2	2	2	2	2	2	0	0	2	2	2	2	0	0	2	0	2	0	2	2	2	2	2	0	0	2	0	2	2	0	0	0	2	0	2	2	0	0	2	2	0
Kukri_c30875_283	2	0	2	0	2	2	2	2	2	2	2	2	2	-1	0	0	2	2	2	2	0	0	2	0	2	0	2	2	2	-1	2	0	0	2	0	2	2	0	0	0	2	0	-1	-1	0	0	2	2	0
Kukri_rep_c68263_453	2	0	2	0	2	2	2	2	2	2	2	2	2	-1	0	0	2	2	2	2	0	0	2	0	2	0	2	2	2	2	2	0	0	2	0	2	2	0	0	0	2	0	-1	-1	0	0	2	2	0
RAC875_c22020_280	2	0	2	0	2	2	2	2	2	2	2	2	2	-1	0	0	2	2	2	2	0	0	2	0	2	0	2	2	2	2	2	0	0	2	0	2	2	0	0	0	2	0	-1	-1	0	0	2	2	0
Tdurum_contig11054_307	2	0	2	0	2	2	2	2	2	2	2	2	2	2	0	0	2	2	2	2	0	0	2	0	2	0	2	2	2	2	2	0	0	2	0	2	2	0	0	0	2	0	2	2	0	0	2	2	0
wsnp_Ku_c14958_23427256	2	0	2	0	2	2	2	2	2	2	2	2	2	-1	0	0	2	2	2	2	0	0	2	0	2	0	2	2	2	2	2	0	0	2	0	2	2	0	0	0	2	0	-1	-1	0	0	2	2	0
wsnp_Ku_c6319_11093041	2	0	2	0	2	2	2	2	2	2	2	2	2	0	0	0	2	2	2	2	0	0	2	0	2	0	2	2	2	0	2	0	0	2	0	2	2	0	0	0	2	0	2	2	0	0	2	2	0
BobWhite_c32495_258	2	0	2	0	2	2	2	2	2	2	2	2	2	0	0	0	2	2	2	2	0	0	2	0	2	0	2	2	2	0	2	0	0	2	0	2	2	0	0	0	2	0	-1	-1	0	0	2	2	0
BS00065389_51	2	0	2	0	2	2	2	2	2	2	2	2	2	0	0	0	2	2	2	2	0	0	2	0	2	0	2	2	2	0	2	0	0	2	0	2	2	0	0	0	2	0	2	2	0	0	2	2	0
Tdurum_contig4567_1467	2	0	2	0	2	2	2	2	2	2	2	2	2	-1	0	0	2	2	2	2	0	0	2	0	2	0	2	2	2	0	2	0	0	2	0	2	2	0	0	0	2	0	2	-1	0	0	2	2	0
BS00090309_51	2	0	2	0	2	2	2	2	2	2	2	2	2	0	0	0	2	2	2	2	0	0	2	0	2	0	2	0	2	0	2	0	0	2	0	2	2	0	0	0	0	0	-1	-1	0	0	2	2	0
Kukri_c41797_393	2	0	2	0	2	2	2	2	2	2	2	2	2	0	0	0	2	2	2	2	0	0	2	0	2	0	2	0	2	0	2	0	0	2	0	2	2	0	0	0	0	0	-1	-1	0	0	2	2	0
Ex_c19057_965	0	0	2	0	2	2	2	2	2	2	2	2	2	0	0	0	2	2	2	2	0	0	2	0	2	2	2	0	2	2	2	0	0	2	0	0	2	2	0	0	0	0	2	-1	0	0	2	2	2
BobWhite_c5748_756	0	0	2	0	2	2	2	2	2	2	2	2	2	-1	0	0	2	2	2	2	0	0	2	0	2	2	2	0	2	2	2	0	0	2	0	0	2	2	0	0	0	0	2	2	0	0	2	2	2
BS00015653_51	0	0	2	0	2	2	2	2	2	2	2	2	2	-1	0	0	2	2	2	2	0	0	2	0	2	2	2	0	2	2	2	0	0	2	0	0	2	2	0	0	0	0	2	2	0	0	2	2	2
BS00022815_51	0	0	2	0	2	2	2	2	2	2	2	2	2	-1	0	0	2	2	2	2	0	0	2	0	2	2	2	0	2	2	2	0	0	2	0	0	2	2	0	0	0	0	-1	-1	0	0	2	2	2
IACX6241	0	0	2	-1	2	2	2	2	2	2	2	2	2	-1	0	0	2	2	2	2	0	0	2	0	2	2	2	0	2	2	2	0	0	2	0	0	2	2	0	0	0	0	2	-1	0	0	2	2	2
Kukri_c36630_225	0	0	2	0	2	2	2	2	2	2	2	2	2	0	0	0	2	2	2	2	0	0	2	0	2	2	2	0	2	2	2	0	0	2	0	0	2	2	0	0	0	0	2	2	0	0	2	2	2
Kukri_c9468_831	0	0	2	0	2	2	2	2	2	2	2	2	2	-1	0	0	2	2	2	2	0	0	2	0	2	2	2	0	2	2	2	0	0	2	0	0	2	2	0	0	0	0	-1	-1	0	0	2	2	2
RAC875_c6719_738	0	0	2	0	2	2	2	2	2	2	2	2	2	-1	0	0	2	2	2	2	0	0	2	0	2	2	2	0	2	2	2	0	0	2	0	0	2	2	0	0	0	0	2	2	0	0	2	2	2
GENE-3440_199	0	0	2	0	2	2	2	2	2	2	2	2	2	-1	0	0	2	2	2	2	0	0	2	0	2	2	2	0	2	2	2	0	0	2	0	0	2	2	0	0	0	0	-1	-1	0	0	2	2	2
Kukri_c53586_128	0	0	2	0	2	2	2	2	2	2	2	2	2	-1	0	0	2	2	2	2	0	0	2	0	2	2	2	0	2	2	2	0	0	2	0	0	2	2	0	0	0	0	2	-1	0	0	2	2	2
tplb0051d06_1385	0	0	2	0	2	2	2	2	2	2	2	2	2	-1	0	0	2	2	2	2	0	0	2	0	2	2	2	0	2	2	2	0	0	2	0	0	2	2	0	0	0	0	-1	-1	0	0	2	2	2
tplb0057m23_1318	0	0	2	0	2	2	2	2	2	2	2	2	2	-1	0	0	2	2	2	2	0	0	2	0	2	2	2	0	2	2	2	0	0	2	0	0	2	2	0	0	0	0	-1	-1	0	0	2	2	2
tplb0057m23_413	0	0	2	0	2	2	2	2	2	2	2	2	2	-1	0	0	2	2	2	2	0	0	2	0	2	2	2	0	2	2	2	0	0	2	0	0	2	2	0	0	0	-1	2	-1	0	0	2	2	2
BobWhite_rep_c64197_143	0	0	2	0	2	2	2	2	2	2	2	2	2	0	0	0	2	2	2	2	0	0	2	0	2	2	2	0	2	0	2	0	0	2	0	0	2	2	0	0	0	0	-1	-1	0	0	2	2	2
BobWhite_c13238_386	0	0	2	0	2	0	2	2	2	0	2	2	2	0	0	0	0	2	2	2	0	0	2	0	2	2	2	0	2	0	2	0	0	2	0	0	2	2	0	0	0	0	-1	2	2	0	2	2	2
RAC875_c232_1895	0	0	2	0	2	0	2	2	2	0	2	2	2	-1	0	0	0	2	2	2	0	0	2	0	2	2	2	0	2	2	2	0	0	2	0	0	2	2	0	0	0	0	2	2	2	0	2	2	2
BobWhite_rep_c61813_322	0	0	2	0	2	0	2	2	2	0	2	2	2	0	0	0	0	2	2	2	0	0	2	0	2	2	2	0	2	0	2	0	0	2	0	0	2	2	0	0	0	0	-1	2	2	0	2	2	2
BS00107192_51	0	0	2	0	2	0	2	2	2	0	2	2	2	0	0	0	0	2	2	2	0	0	2	0	2	2	2	0	2	0	2	0	0	2	0	0	2	2	0	0	0	0	-1	2	2	0	2	2	2
IAAV3514	0	0	2	0	2	0	2	2	2	0	2	2	2	0	0	0	0	2	2	2	0	0	2	0	2	2	2	0	2	0	2	0	0	2	0	0	2	2	0	0	0	0	2	2	2	0	2	2	2
Kukri_c14275_674	0	0	2	0	2	0	2	2	2	0	2	2	2	0	0	0	0	2	2	2	0	0	2	0	2	2	2	0	2	0	2	0	0	2	0	0	2	2	0	0	0	0	2	2	2	0	2	2	2
wsnp_Ku_c14275_22535576	0	0	2	0	2	0	2	2	2	0	2	2	2	0	0	0	0	2	2	2	0	0	2	0	2	2	2	0	2	0	2	0	0	2	0	0	2	2	0	0	0	0	-1	2	2	0	2	2	2
wsnp_Ku_c14275_22535693	0	0	2	0	2	0	2	2	2	0	2	2	2	0	0	0	0	2	2	2	0	0	2	0	2	2	2	0	2	0	2	0	0	2	0	0	2	2	0	0	0	0	-1	2	2	0	2	2	2
Kukri_rep_c104877_2166	0	0	2	0	2	0	2	2	2	0	2	2	2	0	0	0	0	2	2	2	0	0	2	0	2	2	2	2	2	0	2	0	0	2	0	0	2	2	0	0	2	-1	2	2	2	0	2	2	2
BS00100107_51	0	0	2	0	2	0	2	2	-1	0	2	2	2	-1	0	0	0	2	2	0	0	0	2	0	2	2	2	2	2	2	2	0	0	2	0	0	2	2	0	0	2	0	-1	2	2	0	2	2	2
BS00100108_51	0	0	2	0	2	0	2	2	2	0	2	2	2	-1	0	0	0	2	2	0	0	0	2	0	2	2	2	2	2	2	2	0	0	2	0	0	2	2	0	0	2	0	-1	2	2	0	2	2	2
IAAV2363	0	0	2	0	2	0	2	2	2	0	2	2	2	2	0	0	0	2	2	0	0	0	2	0	2	2	2	2	2	2	2	0	0	2	0	0	2	2	0	0	2	0	2	2	2	0	2	2	2
wsnp_Ex_c7383_12654806	0	0	2	0	2	0	2	2	2	0	2	2	2	2	0	0	0	2	2	0	0	0	2	0	2	2	2	2	2	2	2	0	0	2	0	0	2	2	0	0	2	0	2	2	2	0	2	2	2
wsnp_Ex_c7383_12655410	0	0	2	0	2	0	2	2	2	0	2	2	2	-1	0	0	0	2	2	0	0	0	2	0	2	2	2	2	2	2	2	0	0	2	0	0	2	2	0	0	2	0	2	2	2	0	2	2	2
wsnp_Ex_c7383_12655468	0	0	2	0	2	0	2	2	2	0	2	2	2	2	0	0	0	2	2	0	0	0	2	0	2	2	2	2	2	2	2	0	0	2	0	0	2	2	0	0	2	0	2	2	2	0	2	2	2
wsnp_Ex_c7383_12655992	0	0	2	0	2	0	2	2	-1	0	2	2	2	-1	0	0	0	2	2	0	0	0	2	0	2	2	2	2	2	2	2	0	0	2	0	0	2	2	0	0	2	0	-1	2	2	0	2	2	2
BS00009531_51	0	2	2	0	2	0	2	2	2	0	2	2	2	2	0	0	0	2	2	0	0	0	2	0	2	2	2	2	2	2	2	0	0	2	0	0	2	2	0	0	2	0	-1	2	2	0	2	2	2
Ra_c9938_1299	0	2	2	0	2	0	2	2	2	0	2	2	2	2	0	0	0	2	2	0	0	0	2	0	2	2	2	2	2	2	2	0	0	2	0	0	2	2	0	0	2	0	2	2	2	0	2	2	2
Tdurum_contig11933_1503	0	2	2	0	2	0	2	2	2	0	2	2	2	2	0	0	0	2	2	0	0	0	2	0	2	2	2	2	2	2	2	0	0	2	0	0	2	2	0	0	2	0	2	2	2	0	2	2	2
BS00069175_51	0	2	2	0	2	0	2	2	-1	0	2	2	2	-1	0	0	0	2	2	0	0	0	2	0	2	2	2	2	2	2	2	0	0	2	0	0	2	2	0	0	2	0	-1	2	2	0	2	2	2
IACX7820	0	2	2	0	2	0	2	2	2	0	2	2	2	2	0	0	0	2	2	0	0	0	2	0	2	2	2	2	2	2	2	0	0	2	0	0	2	2	0	0	2	0	-1	2	2	0	2	2	2
IACX8002	0	2	2	0	2	0	2	2	-1	0	2	2	2	-1	0	0	0	2	2	0	0	0	2	0	2	2	2	2	2	2	2	0	0	2	0	0	2	2	0	0	2	0	-1	2	2	0	2	2	2
Ra_c9938_1734	0	2	2	0	2	0	2	2	2	0	2	2	2	-1	0	0	0	2	2	0	0	0	2	0	2	2	2	2	2	2	2	0	0	2	0	0	2	2	0	0	2	0	2	2	2	0	2	2	2
wsnp_BE405849A_Ta_1_1	0	2	2	0	2	0	2	2	2	0	2	2	2	-1	0	0	0	2	2	0	0	0	2	0	2	2	2	2	2	2	2	0	0	2	0	0	2	2	0	0	2	0	-1	2	2	0	2	2	2
BobWhite_c6759_365	0	2	2	0	2	0	2	2	2	0	2	2	2	-1	0	0	0	2	2	0	0	0	2	0	2	2	2	2	2	0	2	0	0	2	0	0	2	2	0	0	2	0	-1	2	2	0	0	2	2
CAP8_c1066_309	0	2	2	0	2	0	2	2	2	0	2	2	2	2	0	0	0	2	2	0	0	0	2	0	2	2	2	2	2	0	2	0	0	2	0	0	2	2	0	0	2	0	2	2	2	0	0	2	2
Ku_c47168_563	0	2	2	0	2	0	2	2	-1	0	2	2	2	-1	0	0	0	2	2	0	0	0	2	0	2	2	2	2	2	0	2	0	0	2	0	0	2	2	0	0	2	0	-1	2	2	0	0	2	2
RAC875_c1437_1644	0	2	2	0	2	0	2	2	-1	0	2	2	2	-1	0	0	0	2	2	0	0	0	2	0	2	2	2	2	2	0	2	0	0	2	0	0	2	2	0	0	2	0	-1	2	2	0	0	2	2
wsnp_Ex_c7168_12311649	0	2	2	0	2	0	2	2	2	0	2	2	2	-1	0	0	0	2	2	0	0	0	2	0	2	2	2	2	2	0	2	0	0	2	0	0	2	2	0	0	2	0	-1	2	2	0	0	2	2
IAAV7514	0	2	2	0	2	0	2	2	2	0	2	2	2	2	0	0	0	2	2	0	0	0	2	0	2	2	2	2	2	0	2	0	0	2	0	0	2	2	0	0	2	0	2	2	2	0	0	2	2
BS00094342_51	0	2	2	0	2	0	2	2	2	0	2	2	2	2	0	0	0	2	2	0	0	0	2	0	2	2	2	2	2	0	2	0	0	2	0	0	2	2	0	0	2	0	2	2	2	0	0	2	2
Kukri_c31411_690	0	2	2	0	2	0	2	2	-1	0	2	2	2	2	0	0	0	2	2	0	0	0	2	0	2	2	2	2	2	0	2	0	0	2	0	0	2	2	0	0	2	0	-1	2	2	0	0	2	2
Kukri_c35386_189	0	2	2	0	2	0	2	2	2	0	2	2	2	2	0	0	0	2	2	0	0	0	2	0	2	2	2	2	2	0	2	0	0	2	0	0	2	2	0	0	2	0	2	2	2	0	0	2	2
wsnp_Ku_c35386_44598937	0	2	2	0	2	0	2	2	2	0	2	2	2	2	0	0	0	2	2	0	0	0	2	0	2	2	2	2	2	0	2	0	0	2	0	0	2	2	0	0	2	0	2	2	2	0	0	2	2
wsnp_Ku_c15816_24541162	0	2	2	0	2	0	2	2	2	0	2	2	2	-1	0	0	0	2	2	0	0	0	2	0	2	2	2	0	2	0	2	0	0	2	0	0	2	2	0	0	0	0	2	2	2	0	0	2	2
BS00060445_51	0	2	2	0	2	0	2	2	2	0	2	2	2	-1	0	0	0	2	2	0	0	0	2	0	2	2	2	0	2	0	2	0	0	2	0	0	2	2	0	0	0	0	-1	2	2	0	0	2	2
Excalibur_rep_c111546_167	0	2	2	0	2	0	2	2	2	0	2	2	2	2	0	0	0	2	2	0	0	0	2	0	2	2	2	0	2	0	2	0	0	2	0	0	2	2	0	0	0	0	2	2	2	0	0	2	2
IAAV5294	0	2	2	0	2	0	2	2	2	0	2	2	2	-1	0	0	0	2	2	0	0	0	2	0	2	2	2	0	2	0	2	0	0	2	0	0	2	2	0	0	0	0	-1	2	2	0	0	2	2
Ku_c4925_624	0	2	2	0	2	0	2	2	2	0	2	2	2	-1	0	0	0	2	2	0	0	0	2	0	2	2	2	0	2	0	2	0	0	2	0	0	2	2	0	0	0	0	2	2	2	0	0	2	2
BobWhite_c9057_118	0	2	2	0	2	0	2	2	0	0	2	2	2	-1	0	0	0	2	2	0	0	0	2	0	2	2	2	0	0	0	2	0	0	2	0	0	2	2	0	0	0	0	-1	2	2	2	0	2	2
BobWhite_c5457_1440	0	2	2	0	2	0	2	2	0	0	2	2	2	2	0	0	0	2	2	0	0	0	2	0	2	2	2	0	0	0	2	0	0	2	0	0	2	2	0	0	0	0	-1	2	2	2	0	2	2
IACX424	0	2	2	0	2	0	2	2	0	0	2	2	2	2	0	0	0	2	2	0	0	0	2	0	2	2	2	0	0	0	2	0	0	2	0	0	2	2	0	0	0	0	2	2	2	2	0	2	2
RAC875_c49940_385	0	2	2	0	2	0	2	2	0	0	2	2	2	2	0	0	0	2	2	0	0	0	2	0	2	2	2	0	0	0	2	0	0	2	0	0	2	2	0	0	0	0	2	2	2	2	0	2	2
BobWhite_rep_c64318_615	0	2	2	0	2	0	2	2	0	0	2	2	2	2	0	0	0	2	2	0	0	0	2	0	2	2	2	0	0	0	2	0	0	2	0	0	2	2	0	0	0	0	2	2	2	2	0	2	2
Excalibur_c6567_845	0	2	2	0	2	0	2	2	-1	0	2	2	2	2	0	0	0	2	2	0	0	0	2	0	2	2	2	0	0	0	2	0	0	2	0	0	2	2	0	0	0	0	-1	2	2	2	0	2	2
Kukri_c14056_497	0	2	2	0	2	0	2	2	-1	0	2	2	2	2	0	0	0	2	2	0	0	0	2	0	2	2	2	0	0	0	2	0	0	2	0	0	2	2	0	0	0	0	2	2	2	2	0	2	2
RAC875_c28819_281	0	2	2	0	2	0	2	2	0	0	2	2	2	2	0	0	0	2	2	0	0	0	2	0	2	2	2	0	0	0	2	0	0	2	0	0	2	2	0	0	0	0	-1	2	2	2	0	2	2
RAC875_c28819_320	0	2	2	0	2	0	2	2	-1	0	2	2	2	2	0	0	0	2	2	0	0	0	2	0	2	2	2	0	0	0	2	0	0	2	0	0	2	2	0	0	0	0	-1	2	2	2	0	2	2
wsnp_BE495277A_Ta_2_1	0	2	2	0	2	0	2	2	0	0	2	2	2	2	0	0	0	2	2	0	0	0	2	0	2	2	2	0	0	0	2	0	0	2	0	0	2	2	0	0	0	0	-1	2	2	2	0	2	2
wsnp_BE495277A_Ta_2_5	0	2	2	0	2	0	2	2	0	0	2	2	2	2	0	0	0	2	2	0	0	0	2	0	2	2	2	0	0	0	2	0	0	2	0	0	2	2	0	0	0	0	2	2	2	2	0	2	2
wsnp_Ex_c49211_53875575	0	2	2	0	2	0	2	2	-1	0	2	2	2	2	0	0	0	2	2	0	0	0	2	0	2	2	2	0	2	0	2	0	0	2	0	0	2	2	0	0	0	0	-1	2	2	2	0	2	2
wsnp_Ex_c49211_53875600	0	2	2	0	2	0	2	2	0	0	2	2	2	2	0	0	0	2	2	0	0	0	2	0	2	2	2	0	2	0	2	0	0	2	0	0	2	2	0	0	0	0	-1	2	2	2	0	2	2
GENE-3791_463	0	2	2	0	2	0	2	2	-1	0	2	2	2	2	0	0	0	2	2	0	0	0	2	0	2	2	2	0	0	2	2	0	0	2	0	0	2	2	0	0	0	0	-1	2	2	2	0	2	2
TA004548-0753	0	2	2	0	2	0	2	2	-1	0	2	2	2	2	0	0	0	2	2	0	0	0	2	0	2	2	2	0	0	2	2	0	0	2	0	0	2	2	0	0	0	0	-1	2	2	2	0	2	2
BobWhite_c11512_157	0	2	2	0	2	0	2	2	-1	0	2	2	2	2	0	0	0	2	2	0	0	0	2	0	2	2	2	0	2	2	2	0	0	2	0	0	2	2	0	0	0	0	-1	2	2	2	0	2	2
BS00065313_51	0	2	2	0	2	0	2	2	-1	0	2	2	2	2	0	0	0	2	2	0	0	0	2	0	2	2	2	0	2	2	2	0	0	2	0	0	2	2	0	0	0	0	2	2	2	2	0	2	2
BS00085826_51	0	2	2	0	2	0	2	2	-1	0	2	2	2	2	0	0	0	2	2	0	0	0	2	0	2	2	2	0	2	2	2	0	0	2	0	0	2	2	0	0	0	0	-1	2	2	2	0	2	2
Excalibur_c22783_765	0	2	2	0	2	0	2	2	0	0	2	2	2	2	0	0	0	2	2	0	0	0	2	0	2	2	2	0	2	2	2	0	0	2	0	0	2	2	0	0	0	0	2	2	2	2	0	2	2
Excalibur_c2598_2052	0	2	2	0	2	0	2	2	-1	0	2	2	2	2	0	0	0	2	2	0	0	0	2	0	2	2	2	0	2	2	2	0	0	2	0	0	2	2	0	0	0	0	2	2	2	2	0	2	2
Kukri_c63163_141	0	2	2	0	2	0	2	2	2	0	2	2	2	2	0	0	0	2	2	0	0	0	2	0	2	2	2	0	2	2	2	0	0	2	0	0	2	2	0	0	0	0	2	2	2	2	0	2	2
RAC875_c31670_389	0	2	2	0	2	0	2	2	-1	0	2	2	2	2	0	0	0	2	2	0	0	0	2	0	2	2	2	0	2	2	2	0	0	2	0	0	2	2	0	0	0	0	-1	2	2	2	0	2	2
RAC875_c68120_285	0	2	2	0	2	0	2	2	2	0	2	2	2	2	0	0	0	2	2	0	0	0	2	0	2	2	2	0	2	2	2	0	0	2	0	0	2	2	0	0	0	0	2	2	2	2	0	2	2
RAC875_c8690_446	0	2	2	0	2	0	2	2	-1	0	2	2	2	2	0	0	0	2	2	0	0	0	2	0	2	2	2	0	2	2	2	0	0	2	0	0	2	2	0	0	0	0	-1	2	2	2	0	2	2
JD_c5000_410	0	2	2	0	0	0	2	2	-1	0	2	2	2	-1	0	0	0	2	2	0	0	0	2	0	2	2	2	0	2	2	2	0	0	2	0	0	2	2	0	0	0	0	-1	2	2	2	0	2	2
Kukri_c13590_344	0	2	2	0	0	0	2	2	-1	0	2	2	2	2	0	0	0	2	2	0	0	0	2	0	2	2	2	0	2	2	2	0	0	2	0	0	2	2	0	0	0	0	2	2	2	2	0	2	2
wsnp_Ex_c24215_33462239	0	2	2	0	0	0	2	2	-1	0	2	2	2	2	0	0	0	2	2	0	0	0	2	0	2	2	2	0	2	2	2	0	0	2	0	0	2	2	0	0	0	0	2	2	2	2	0	2	2
CAP11_c3591_72	0	2	2	0	0	0	2	2	-1	0	2	2	2	-1	0	0	0	2	2	0	0	0	2	0	2	2	2	0	2	2	2	0	0	2	0	0	2	2	0	0	0	0	-1	2	2	2	0	2	2
Excalibur_c12332_217	0	2	2	0	0	0	2	2	-1	0	2	2	2	2	0	0	0	2	2	0	0	0	2	0	2	2	2	0	2	2	2	0	0	2	0	0	2	2	0	0	0	0	-1	2	2	2	0	2	2
Excalibur_c12332_161	0	2	2	0	0	0	2	2	0	0	2	2	2	2	0	0	0	2	2	0	0	0	2	0	2	2	2	0	2	2	2	0	0	2	0	0	2	2	0	0	0	0	2	2	2	2	0	2	2
RAC875_c25072_389	0	2	2	0	0	0	2	2	-1	0	2	2	2	2	0	0	0	2	2	0	0	0	2	0	2	2	2	0	2	2	2	0	0	2	0	0	2	2	0	0	0	0	-1	2	2	2	0	2	2
RAC875_c8544_646	0	2	2	0	0	0	2	2	-1	0	2	2	2	2	0	0	0	2	2	0	0	0	2	0	2	2	2	0	2	2	2	0	0	2	0	0	2	2	0	0	0	0	-1	2	2	2	0	2	2
BS00023076_51	0	2	2	0	0	0	2	2	-1	0	2	2	2	2	0	0	0	2	2	0	0	0	2	0	2	2	2	0	2	2	2	0	0	2	0	0	2	2	0	0	0	0	-1	2	2	2	0	2	2
BS00094388_51	0	2	2	0	0	0	2	2	-1	0	2	2	2	2	0	0	0	2	2	0	0	0	2	0	2	2	2	0	2	2	2	0	0	2	0	0	2	2	0	0	0	0	-1	2	2	2	0	2	2
Jagger_c7747_323	0	2	2	0	0	0	2	2	-1	0	2	2	2	2	0	0	0	2	2	0	0	0	2	0	2	2	2	0	2	2	2	0	0	2	0	0	2	2	0	0	0	0	-1	2	2	2	0	2	2
wsnp_Ex_c4244_7662955	0	2	2	0	0	0	2	2	2	0	2	2	2	2	0	0	0	2	2	0	0	0	2	0	2	2	2	0	2	2	2	0	0	2	0	0	2	2	0	0	0	0	2	2	2	2	0	2	2
BS00066318_51	0	2	2	0	0	0	2	2	-1	0	2	2	2	2	0	0	0	2	2	0	0	0	2	0	2	2	2	0	2	2	2	0	0	2	0	0	2	2	0	0	0	0	-1	2	2	2	0	2	2
BS00022818_51	0	2	2	0	0	0	2	2	2	0	2	2	2	2	0	0	0	2	2	0	0	0	2	0	2	2	2	0	2	2	2	0	0	2	0	0	2	2	0	0	0	0	2	2	2	2	0	2	2
BobWhite_c7114_237	2	-1	0	2	0	0	2	2	0	2	0	0	0	-1	2	2	2	2	2	0	2	2	0	2	2	2	2	0	2	2	2	2	0	0	2	2	2	2	0	2	0	0	-1	-1	2	2	0	0	2
Kukri_rep_c95804_119	2	2	0	2	0	0	2	2	0	2	0	0	0	-1	2	2	2	2	2	0	2	2	0	2	2	2	2	0	2	2	2	2	0	0	2	2	2	2	0	2	0	0	-1	-1	2	2	0	0	2
TA004832-0873	2	2	0	2	0	2	2	2	0	2	0	0	0	2	2	2	2	2	2	0	2	2	0	2	2	2	2	0	2	2	2	2	0	0	2	2	2	2	0	2	0	0	2	0	0	2	2	0	2
wsnp_Ex_c6209_10838456	2	0	0	2	0	2	2	2	0	2	0	0	0	2	2	2	2	2	2	-1	2	2	0	2	2	2	2	0	2	2	2	2	0	0	2	2	2	2	0	2	0	0	0	0	0	2	2	0	2
BS00099534_51	2	0	0	2	0	2	2	2	-1	2	0	0	0	2	2	2	2	2	2	0	2	2	0	2	2	2	2	0	2	2	2	2	0	0	2	2	2	2	0	2	0	0	-1	0	0	2	2	0	2
Excalibur_c6714_246	2	-1	0	2	0	2	2	2	0	2	0	0	0	2	2	-1	2	2	2	0	2	2	0	2	2	0	2	0	2	0	2	2	0	0	2	2	2	0	0	2	0	0	-1	0	0	2	2	0	2
BS00022116_51	2	-1	0	2	0	2	2	2	0	2	0	0	0	2	2	0	2	2	2	0	2	2	0	2	2	0	2	0	2	0	2	2	0	0	2	2	2	0	0	2	0	0	-1	0	0	2	2	0	2
RAC875_c68530_59	2	2	0	2	0	2	2	2	0	2	0	0	0	2	2	-1	2	2	2	0	2	2	0	2	2	0	2	0	2	0	2	2	0	0	2	2	2	0	0	2	0	0	0	0	0	2	2	0	2
TA003745-0632	2	-1	0	2	0	2	2	2	0	2	0	0	0	2	2	-1	2	2	2	0	2	2	0	2	0	0	2	0	2	0	0	2	0	0	2	0	2	0	0	2	0	0	-1	0	0	2	2	0	2
TA006089-0703	2	-1	0	2	0	2	2	2	2	2	0	0	0	2	2	-1	2	2	2	0	2	2	0	2	0	0	2	0	2	2	0	2	0	0	2	0	2	0	0	2	0	0	2	0	0	2	2	0	2
RFL_Contig4979_4240	2	-1	0	2	0	2	2	2	-1	2	0	0	0	2	2	-1	2	2	2	0	2	2	0	2	0	0	2	0	2	2	0	2	0	0	2	0	2	0	0	2	0	0	-1	0	0	2	2	0	2
IAAV2776	2	2	0	2	0	2	2	2	-1	2	0	0	0	2	2	-1	2	2	2	0	2	2	0	2	0	0	2	0	2	2	0	2	0	0	2	0	2	0	0	2	0	0	-1	0	0	2	2	0	2
Tdurum_contig12695_337	2	2	0	2	0	2	2	2	0	2	0	0	0	2	2	0	2	2	2	0	2	2	0	2	0	0	2	0	2	0	0	2	0	0	2	0	2	0	0	0	0	0	2	0	0	0	2	0	2
wsnp_Ku_c9559_16000086	2	-1	0	2	0	2	2	2	0	2	0	0	0	2	2	0	2	2	2	0	2	2	0	2	0	0	2	0	2	0	0	2	0	0	2	0	2	0	0	0	0	0	-1	0	0	0	2	0	2
Kukri_c9358_269	2	-1	0	2	0	2	2	2	0	2	0	0	0	-1	2	0	2	2	2	0	2	2	0	2	0	0	2	0	2	0	0	2	0	0	2	0	2	0	0	0	0	0	-1	0	0	0	2	0	2
IACX5832	2	2	0	2	0	2	2	2	0	2	0	0	0	2	2	0	2	2	2	0	2	2	0	2	0	0	2	0	2	0	0	2	0	0	2	0	2	0	0	0	0	0	2	0	0	0	2	0	2
Excalibur_c1110_978	2	-1	0	2	0	2	2	2	0	2	0	0	0	2	2	0	2	2	2	0	2	2	0	2	0	0	2	0	2	0	0	2	0	0	2	0	2	0	0	0	0	0	-1	0	0	0	2	0	2
Excalibur_c1110_328	2	2	0	2	0	2	2	2	0	2	0	0	0	2	2	0	2	2	2	0	2	2	0	2	0	0	2	0	2	0	0	2	0	0	2	0	2	0	0	0	0	0	2	0	0	0	2	0	2
BS00031073_51	2	-1	0	2	0	2	2	2	0	2	0	0	0	2	2	0	2	2	2	0	2	2	0	2	0	0	2	0	2	0	0	2	0	0	2	0	2	0	0	0	0	0	-1	0	0	0	2	0	2
wsnp_Ex_c57094_58953404	2	2	0	2	0	2	2	2	0	2	0	0	0	2	2	0	2	2	2	0	2	2	0	2	0	0	2	0	2	0	0	2	0	0	2	0	2	0	0	0	0	0	2	0	0	0	2	0	2
BS00101071_51	2	2	0	2	0	2	2	2	0	2	0	0	0	2	2	0	2	2	2	0	2	2	0	2	0	0	2	0	2	0	0	2	0	0	2	0	2	0	0	0	0	0	-1	0	0	0	2	0	2
BS00003696_51	2	2	0	2	0	2	2	2	0	2	0	0	0	2	2	0	2	2	2	0	2	2	0	2	0	0	2	0	2	0	0	2	0	0	2	0	2	0	0	0	0	0	2	0	0	0	2	0	2
wsnp_Ex_c28908_37989320	2	-1	0	2	0	2	2	2	0	2	0	0	0	-1	2	0	2	2	2	0	2	2	0	2	0	0	2	0	2	2	0	2	0	0	2	0	2	0	0	0	0	0	-1	0	0	0	2	0	2
BS00086096_51	2	-1	0	2	0	2	2	2	0	2	0	0	0	-1	2	0	2	2	2	0	2	2	0	2	0	0	2	0	2	2	0	2	0	0	2	0	2	0	0	0	0	0	-1	0	0	0	2	0	2
wsnp_Ex_c11992_19213872	2	-1	0	2	0	2	2	2	0	2	0	0	0	2	2	0	2	2	2	0	2	2	0	2	0	0	2	0	2	2	0	2	0	0	2	0	2	0	0	0	0	0	-1	-1	2	0	2	0	2
RFL_Contig3352_463	2	-1	0	2	0	2	2	2	0	2	0	0	0	2	2	0	2	2	2	0	2	2	0	2	0	0	2	0	2	2	0	2	0	0	2	0	2	0	0	0	0	0	-1	-1	2	0	2	0	2
Excalibur_rep_c115510_314	0	-1	0	2	2	2	2	2	0	0	2	0	0	0	0	0	2	2	2	2	2	2	0	0	0	0	2	0	2	0	0	2	2	0	-1	0	2	0	0	0	0	0	-1	0	2	0	0	0	2
RFL_Contig3674_847	0	2	0	2	2	2	2	2	0	0	2	0	0	0	0	0	2	2	2	2	2	2	0	0	0	0	2	0	2	0	0	2	2	0	2	0	2	0	0	0	0	0	2	-1	2	0	0	0	2
Excalibur_c17904_437	0	-1	0	2	2	2	2	2	0	0	2	0	0	0	0	0	2	2	2	2	2	2	0	0	0	0	2	0	2	-1	0	2	2	0	2	0	2	0	0	0	0	0	2	0	2	0	0	0	2
Tdurum_contig76911_950	2	2	2	2	2	2	0	2	2	0	2	0	2	2	0	0	0	0	2	0	0	0	2	2	0	2	2	2	0	2	0	0	0	2	0	2	2	2	2	0	2	0	2	-1	2	0	2	0	2
RAC875_c32053_291	2	2	2	2	2	2	0	2	2	0	2	0	2	2	0	0	0	0	2	0	0	0	2	2	0	2	2	2	0	0	0	0	0	2	0	2	2	2	2	0	2	0	2	-1	2	0	2	0	2
Tdurum_contig57672_482	2	2	2	2	2	2	0	2	2	0	2	0	2	2	0	0	0	0	2	0	0	0	2	2	0	2	2	2	0	0	0	0	0	2	0	2	2	2	2	0	2	0	2	0	2	0	2	0	2
BobWhite_c44549_83	2	2	2	0	2	2	0	2	2	0	2	0	2	2	0	0	0	0	2	0	0	0	2	2	0	2	2	2	0	0	0	0	0	2	0	2	2	2	2	0	2	0	2	2	2	0	2	0	2
wsnp_Ex_c15378_23638822	2	2	2	0	2	2	0	2	2	0	2	0	2	2	0	0	0	0	2	0	0	0	0	2	0	2	2	2	0	0	0	0	0	0	0	2	2	2	0	0	2	0	2	2	2	0	2	0	2
wsnp_Ex_c15378_23639387	2	2	2	0	2	2	0	2	-1	0	2	0	2	-1	0	0	0	0	2	0	0	0	0	2	0	2	2	2	0	0	0	0	0	0	0	2	2	2	0	0	2	0	2	2	2	0	2	0	2
Jagger_c2853_75	2	2	2	0	2	2	0	2	2	2	2	0	2	2	0	0	0	0	2	0	0	0	0	2	0	2	2	2	0	0	0	0	0	0	0	2	2	2	0	0	2	0	2	2	2	0	2	0	2
Tdurum_contig92819_647	2	2	2	0	2	2	0	2	2	2	2	0	2	2	0	0	0	0	2	0	0	0	0	2	0	2	2	2	0	0	0	0	0	0	0	2	2	2	0	0	2	0	2	2	2	0	2	0	2
IAAV4950	2	2	2	0	2	2	0	2	2	2	2	0	2	2	0	2	0	0	2	0	0	0	0	2	0	2	2	2	0	0	0	0	0	0	0	2	2	2	0	0	2	0	2	2	2	0	2	0	2
Kukri_c77911_260	2	2	0	0	2	0	0	2	2	2	-1	-1	2	-1	0	2	0	0	2	0	0	0	0	0	0	2	2	2	0	2	0	0	0	0	0	2	0	2	0	0	2	0	2	2	2	0	0	0	2
GENE-3659_104	2	2	0	0	2	0	0	2	2	2	2	0	2	-1	0	2	0	0	2	0	0	0	0	0	0	2	2	2	0	2	0	0	0	0	0	2	0	2	0	0	2	0	2	2	2	0	0	0	2
GENE-3659_162	2	2	0	0	2	0	0	2	2	2	2	0	2	-1	-1	2	0	0	2	0	0	0	0	0	0	2	2	2	0	2	0	0	0	0	0	2	0	2	0	0	2	0	2	2	2	0	0	0	2
BS00066623_51	2	2	0	0	2	0	0	2	2	2	2	0	2	0	2	2	0	0	2	0	0	0	0	0	0	2	2	2	0	2	0	0	0	0	0	2	2	2	0	0	2	2	2	2	2	0	0	0	2
BS00037223_51	2	2	0	0	2	0	0	2	2	2	2	0	2	0	2	2	0	0	2	0	0	0	0	0	0	2	2	2	0	2	0	0	0	0	0	2	2	2	0	0	2	2	2	2	2	0	0	0	2
BS00036033_51	2	2	0	0	2	0	0	2	2	2	2	0	2	0	2	2	0	0	2	0	0	0	0	0	0	2	2	2	0	2	0	0	0	0	0	2	2	2	0	0	2	2	2	2	2	0	0	0	2
BS00066605_51	2	2	0	0	2	0	0	2	2	2	2	0	2	0	2	2	0	0	2	0	0	0	0	0	0	2	2	2	0	2	0	0	0	0	0	2	2	2	0	0	2	2	2	2	2	0	0	0	2
GENE-4249_885	2	2	0	0	2	0	0	2	2	2	2	0	2	0	2	2	0	0	2	0	0	0	0	0	0	2	2	2	0	2	0	0	0	0	0	2	2	2	0	0	2	2	2	2	2	0	0	0	2
Kukri_c10879_164	2	2	0	0	2	0	0	2	2	2	2	0	2	0	2	2	0	0	2	0	0	0	0	0	0	2	2	2	0	2	0	0	0	0	0	2	2	2	0	0	2	2	2	2	2	0	0	0	2
RAC875_c13785_2042	2	2	0	0	2	0	0	2	2	2	2	0	2	0	2	2	0	0	2	0	0	0	0	0	0	2	2	2	0	2	0	0	0	0	0	2	2	2	0	0	2	2	2	2	2	0	0	0	2
BS00005019_51	2	2	0	0	2	0	0	2	2	2	2	0	2	0	2	2	0	0	2	0	0	0	0	0	0	2	2	2	0	2	0	0	0	0	0	2	2	2	0	0	2	2	2	2	2	0	0	0	2
BS00063215_51	2	2	0	0	2	0	0	2	2	2	2	0	2	0	2	2	0	0	2	0	0	0	0	0	0	2	2	2	0	2	0	0	0	0	0	2	2	2	0	0	2	2	2	2	2	0	0	0	2
BS00065633_51	2	2	0	0	2	0	0	2	2	2	2	0	2	0	2	2	0	0	2	0	0	0	0	0	0	2	2	2	0	2	0	0	0	0	0	2	2	2	0	0	2	2	2	2	2	0	0	0	2
BS00071706_51	2	2	0	0	2	0	0	2	2	2	2	0	2	0	2	2	0	0	2	0	0	0	0	0	0	2	2	2	0	2	0	0	0	0	0	2	2	2	0	0	2	2	2	2	2	0	0	0	2
BS00071708_51	2	2	0	0	2	0	0	2	2	2	2	0	2	0	2	2	0	0	2	0	0	0	0	0	0	2	2	2	0	2	0	0	0	0	0	2	2	2	0	0	2	2	2	2	2	0	0	0	2
BS00073872_51	2	2	0	0	2	0	0	2	2	2	2	0	2	0	2	2	0	0	2	0	0	0	0	0	0	2	2	2	0	2	0	0	0	0	0	2	2	2	0	0	2	2	2	2	2	0	0	0	2
BS00074752_51	2	2	0	0	2	0	0	2	2	2	2	0	2	0	2	2	0	0	2	0	0	0	0	0	0	2	2	2	0	2	0	0	0	0	0	2	2	2	0	0	2	2	2	2	2	0	0	0	2
BS00084250_51	2	2	0	0	2	0	0	2	2	2	2	0	2	0	2	2	0	0	2	0	0	0	0	0	0	2	2	2	0	2	0	0	0	0	0	2	2	2	0	0	2	2	2	2	2	0	0	0	2
BS00084251_51	2	2	0	-1	2	0	0	2	2	2	2	0	2	0	2	2	0	0	2	0	0	0	0	0	0	2	2	2	0	2	0	0	0	0	0	2	2	2	0	0	2	2	2	2	2	0	0	0	2
Excalibur_c41490_397	2	2	0	0	2	0	0	2	2	2	2	0	2	0	2	2	0	0	2	0	0	0	0	0	0	2	2	2	0	2	0	0	0	0	0	2	2	2	0	0	2	2	2	2	2	0	0	0	2
IAAV5035	2	2	0	0	2	0	0	2	2	2	2	0	2	0	2	2	0	0	2	0	0	0	0	0	0	2	2	2	0	2	0	0	0	0	0	2	2	2	0	0	2	2	2	2	2	0	0	0	2
IAAV7790	2	2	0	0	2	0	0	2	2	2	2	0	2	0	2	2	0	0	2	0	0	0	0	0	0	2	2	2	0	2	0	0	0	0	0	2	2	2	0	0	2	2	2	2	2	0	0	0	2
Ku_c45494_267	2	2	0	0	2	0	0	2	2	2	2	0	2	0	2	2	0	0	2	0	0	0	0	0	0	2	2	2	0	2	0	0	0	0	0	2	2	2	0	0	2	2	2	2	2	0	0	0	2
RAC875_c7560_398	2	2	0	0	2	0	0	2	2	2	2	0	2	0	2	2	0	0	2	0	0	0	0	0	0	2	2	2	0	2	0	0	0	0	0	2	2	2	0	0	2	2	2	2	2	0	0	0	2
RAC875_rep_c72327_349	2	2	0	0	2	0	0	2	2	2	2	0	2	0	2	2	0	0	2	0	0	0	0	0	0	2	2	2	0	2	0	0	0	0	0	2	2	2	0	0	2	2	2	2	2	0	0	0	2
wsnp_CAP11_c1244_714229	2	2	0	0	2	0	0	2	2	2	2	0	2	0	2	2	0	0	2	0	0	0	0	0	0	2	2	2	0	2	0	0	0	0	0	2	2	2	0	0	2	2	2	2	2	0	0	0	2
wsnp_CAP12_c1226_628910	2	2	0	0	2	0	0	2	2	2	2	0	2	0	2	2	0	0	2	0	0	0	0	0	0	2	2	2	0	2	0	0	0	0	0	2	2	2	0	0	2	2	2	2	2	0	0	0	2
wsnp_Ex_c8741_14630167	2	2	0	0	2	0	0	2	2	2	2	0	2	0	2	2	0	0	2	0	0	0	0	0	0	2	2	2	0	2	0	0	0	0	0	2	2	2	0	0	2	2	2	2	2	0	0	0	2
wsnp_JD_c10969_11530496	2	2	0	0	2	0	0	2	2	2	2	0	2	0	2	2	0	0	2	0	0	0	0	0	0	2	2	2	0	2	0	0	0	0	0	2	2	2	0	0	2	2	2	2	2	0	0	0	2
wsnp_JD_c34368_25929293	2	2	0	0	2	0	0	2	2	2	2	0	2	0	2	2	0	0	2	0	0	0	0	0	0	2	2	2	0	2	0	0	0	0	0	2	2	2	0	0	2	2	2	2	2	0	0	0	2
wsnp_JD_c3839_4902725	2	2	0	0	2	0	0	2	2	2	2	0	2	0	2	2	0	0	2	0	0	0	0	0	0	2	2	2	0	2	0	0	0	0	0	2	2	2	0	0	2	2	2	2	2	0	0	0	2
wsnp_JD_rep_c48797_33040150	2	2	0	0	2	0	0	2	2	2	2	0	2	0	2	2	0	0	2	0	0	0	0	0	0	2	2	2	0	2	0	0	0	0	0	2	2	2	0	0	2	2	2	2	2	0	0	0	2
wsnp_JD_rep_c62949_40140212	2	2	0	0	2	0	0	2	2	2	2	0	2	0	2	2	0	0	2	0	0	0	0	0	0	2	2	2	0	2	0	0	0	0	0	2	2	2	0	0	2	2	2	2	2	0	0	0	2
wsnp_Ku_c4296_7807837	2	2	0	0	2	0	0	2	2	2	2	0	2	-1	2	2	0	0	2	0	0	0	0	0	0	2	2	2	0	-1	0	0	0	0	0	2	2	2	0	0	2	2	2	2	2	0	0	0	2
IAAV8493	2	2	0	0	2	0	0	2	2	2	2	0	2	0	2	2	0	0	2	0	0	0	0	0	0	2	2	2	0	2	0	0	0	0	0	0	2	2	0	0	2	2	2	2	2	0	0	0	2
Ku_c18430_1287	2	2	0	0	2	0	0	2	2	2	2	0	2	0	2	2	0	0	2	0	0	0	0	0	0	2	2	2	0	2	0	0	0	0	0	0	2	2	0	0	2	2	2	2	2	0	0	0	2
wsnp_Ku_c22358_32187765	2	2	0	0	2	0	0	2	2	2	2	0	2	0	2	2	0	0	2	0	0	0	0	0	0	2	2	2	0	2	0	0	0	0	0	0	2	2	0	0	2	2	2	2	2	0	0	0	2
BobWhite_rep_c63152_444	2	2	0	0	2	0	0	2	2	2	2	0	2	-1	2	2	0	0	2	0	0	0	0	0	0	2	2	2	0	2	0	0	0	0	0	0	2	2	0	0	2	2	2	2	2	0	0	0	2
Ex_c24379_1031	2	2	0	0	2	0	0	2	2	2	2	0	2	-1	2	2	0	0	2	0	0	0	0	0	0	2	2	2	0	2	0	0	0	0	0	0	2	2	0	0	2	2	2	2	2	0	0	0	2
Ku_c21399_772	2	2	0	0	2	0	0	2	2	2	2	0	2	-1	2	2	0	0	2	0	0	0	0	0	0	2	2	2	0	2	0	0	0	0	0	0	2	2	0	0	2	2	2	2	2	0	0	0	2
Ku_c56003_719	2	2	0	0	2	0	0	2	2	2	2	0	2	0	2	2	0	0	2	0	0	0	0	0	0	2	2	2	0	2	0	0	0	0	0	0	2	2	0	0	2	2	2	2	2	0	0	0	2
Ra_c11721_766	2	2	0	0	2	0	0	2	2	2	2	0	2	-1	2	2	0	0	2	0	0	0	0	0	0	2	2	2	0	2	0	0	0	0	0	0	2	2	0	0	2	2	2	2	2	0	0	0	2
Tdurum_contig29629_437	2	2	0	0	2	0	0	2	2	2	2	0	2	-1	2	2	0	0	2	0	0	0	0	0	0	2	2	2	0	2	0	0	0	0	0	0	2	2	0	0	2	2	2	2	2	0	0	0	2
tplb0056d17_78	2	2	0	0	2	0	0	2	2	2	2	0	2	-1	2	2	0	0	2	0	0	0	0	0	0	2	2	2	0	2	0	0	0	0	0	0	2	2	0	0	2	2	2	2	2	0	0	0	2
tplb0057g20_780	2	2	0	0	2	0	0	2	2	2	2	0	2	-1	2	2	0	0	2	0	0	0	0	0	0	2	2	2	0	2	0	0	0	0	0	0	2	2	0	0	2	2	2	2	2	0	0	0	2
BobWhite_c2568_115	2	2	0	0	2	0	0	2	2	2	2	0	2	-1	2	2	0	0	2	0	0	0	0	0	0	2	2	2	0	2	0	0	0	0	0	0	2	2	0	0	2	2	2	2	2	0	0	0	2
BS00010780_51	2	2	0	0	2	0	0	2	2	2	2	0	2	0	2	2	0	0	2	0	0	0	0	0	0	2	2	2	0	2	0	0	0	0	0	0	2	2	0	0	2	2	2	2	2	0	0	0	2
BS00022836_51	2	2	0	0	2	0	0	2	2	2	2	0	2	-1	2	2	0	0	2	0	0	0	0	0	0	2	2	2	0	2	0	0	0	0	0	0	2	2	0	0	2	2	2	2	2	0	0	0	2
BS00028263_51	2	2	0	0	2	0	0	2	2	2	2	0	2	-1	2	2	0	0	2	0	0	0	0	0	0	2	2	2	0	2	0	0	0	0	0	0	2	2	0	0	2	2	2	2	2	0	0	0	2
BS00074433_51	2	2	0	0	2	0	0	2	2	2	2	0	2	-1	2	2	0	0	2	0	0	0	0	0	0	2	2	2	0	2	0	0	0	0	0	0	2	2	0	0	2	2	2	2	2	0	0	0	2
BS00087447_51	2	2	0	0	2	0	0	2	2	2	2	0	2	-1	2	2	0	0	2	0	0	0	0	0	0	2	2	2	0	2	0	0	0	0	0	0	2	2	0	0	2	2	2	2	2	0	0	0	2
CAP12_c118_95	2	2	0	0	2	0	0	2	2	2	2	0	2	-1	2	2	0	0	2	0	0	0	0	0	0	2	2	2	0	2	0	0	0	0	0	0	2	2	0	0	2	2	2	2	2	0	0	0	2
Excalibur_c2834_397	2	2	0	0	2	0	0	2	2	2	2	0	2	-1	2	2	0	0	2	0	0	0	0	0	0	2	2	2	0	2	0	0	0	0	0	0	2	2	0	0	2	2	2	2	2	0	0	0	2
Excalibur_c53981_77	2	2	0	0	2	0	0	2	2	2	2	0	2	0	2	2	0	0	2	0	0	0	0	0	0	2	2	2	0	2	0	0	0	0	0	0	2	2	0	0	2	2	2	2	2	0	0	0	2
Kukri_c19612_514	2	2	0	0	2	0	0	2	2	2	2	0	2	-1	2	2	0	0	2	0	0	0	0	0	0	2	2	2	0	2	0	0	0	0	0	0	2	2	0	0	2	2	2	2	2	0	0	0	2
Kukri_c19802_710	2	2	0	0	2	0	0	2	2	2	2	0	2	-1	2	2	0	0	2	0	0	0	0	0	0	2	2	2	0	2	0	0	0	0	0	0	2	2	0	0	2	2	2	2	2	0	0	0	2
Kukri_c29966_1223	2	2	0	0	2	0	0	2	2	2	2	0	2	0	2	2	0	0	2	0	0	0	0	0	0	2	2	2	0	2	0	0	0	0	0	0	2	2	0	0	2	2	2	2	2	0	0	0	2
Kukri_c65887_282	2	2	0	0	2	0	0	2	2	2	2	0	2	-1	2	2	0	0	2	0	0	0	0	0	0	2	2	2	0	2	0	0	0	0	0	0	2	2	0	0	2	2	2	2	2	0	0	0	2
Kukri_rep_c73457_419	2	2	0	0	2	0	0	2	2	2	2	0	2	-1	2	2	0	0	2	0	0	0	0	0	0	2	2	2	0	2	0	0	0	0	0	0	2	2	0	0	2	2	2	2	2	0	0	0	2
Ra_c11721_631	2	2	0	0	2	0	0	2	2	2	2	0	2	0	2	2	0	0	2	0	0	0	0	0	0	2	2	2	0	2	0	0	0	0	0	0	2	2	0	0	2	2	2	2	2	0	0	0	2
RAC875_c29455_79	2	2	0	0	2	0	0	2	2	2	2	0	2	-1	2	2	0	0	2	0	0	0	0	0	0	2	2	2	0	2	0	0	0	0	0	0	2	2	0	0	2	2	2	2	2	0	0	0	2
RAC875_c691_1486	2	2	0	0	2	0	0	2	2	2	2	0	2	0	2	2	0	0	2	0	0	0	0	0	0	2	2	2	0	2	0	0	0	0	0	0	2	2	0	0	2	2	2	2	2	0	0	0	2
Tdurum_contig42858_1256	2	2	0	0	2	0	0	2	2	2	2	0	2	0	2	2	0	0	2	0	0	0	0	0	0	2	2	2	0	2	0	0	0	0	0	0	2	2	0	0	2	2	2	2	2	0	0	0	2
Tdurum_contig42858_1352	2	2	0	0	2	0	0	2	2	2	2	0	2	-1	2	2	0	0	2	0	0	0	0	0	0	2	2	2	0	2	0	0	0	0	0	0	2	2	0	0	2	2	2	2	2	0	0	0	2
tplb0035a03_368	2	2	0	0	2	0	0	2	2	2	2	0	2	-1	2	2	0	0	2	0	0	0	0	0	0	2	2	2	0	2	0	0	0	0	0	0	2	2	0	0	2	2	2	2	2	0	0	0	2
wsnp_Ex_c48789_53586406	2	2	0	0	2	0	0	2	2	2	2	0	2	-1	2	2	0	0	2	0	0	0	0	0	0	2	2	2	0	2	0	0	0	0	0	0	2	2	0	0	2	2	2	2	2	0	0	0	2
wsnp_Ex_c48789_53586502	2	2	0	0	2	0	0	2	2	2	2	0	2	-1	2	2	0	0	2	0	0	0	0	0	0	2	2	2	0	2	0	0	0	0	0	0	2	2	0	0	2	2	2	2	2	0	0	0	2
wsnp_Ex_c15268_23489498	2	2	0	0	2	0	0	2	2	2	2	0	2	0	2	2	0	0	2	0	0	0	0	0	0	2	2	2	0	2	0	0	0	0	0	0	2	2	0	0	2	2	2	2	2	0	0	0	2
Kukri_c6128_238	2	2	0	0	2	0	0	2	2	-1	2	0	2	2	2	2	0	0	2	0	0	0	0	2	0	2	2	2	0	0	0	0	0	0	0	0	2	2	0	0	2	2	2	2	2	0	0	0	2
RAC875_c104548_369	2	2	0	0	2	0	0	2	2	2	2	0	2	2	2	2	0	0	2	0	0	0	0	2	0	2	2	2	0	0	0	0	0	0	0	0	2	2	0	0	2	2	2	2	2	0	0	0	2
Tdurum_contig29974_90	2	2	0	0	2	0	0	2	2	2	2	0	2	-1	2	2	0	0	2	0	0	0	0	2	0	2	2	2	0	0	0	0	0	0	0	0	2	2	0	0	2	2	2	2	2	0	0	0	2
Tdurum_contig55363_297	2	2	0	0	2	0	0	2	2	2	2	0	2	2	2	2	0	0	2	0	0	0	0	2	0	2	2	2	0	0	0	0	0	0	0	0	2	2	0	0	2	2	2	2	2	0	0	0	2
wsnp_CAP12_c928_486444	2	2	0	0	2	0	0	2	2	2	2	0	2	2	2	2	0	0	2	0	0	0	0	2	0	2	2	2	0	0	0	0	0	0	0	0	2	2	0	0	2	2	2	2	2	0	0	0	2
wsnp_Ku_rep_c102901_89769309	2	2	0	0	2	0	0	2	2	2	2	0	2	2	2	2	0	0	2	0	0	0	0	2	0	2	2	2	0	0	0	0	0	0	0	0	2	2	0	0	2	2	2	2	2	0	0	0	2
wsnp_Ra_c12086_19452422	2	2	0	0	2	0	0	2	2	2	2	0	2	2	2	2	0	0	2	0	0	0	0	2	0	2	2	2	0	0	0	0	0	0	0	0	2	2	0	0	2	2	2	2	2	0	0	0	2
Ex_c8890_2497	2	2	0	0	2	0	0	2	2	2	2	0	2	2	2	2	0	0	2	0	0	0	0	2	0	2	2	2	0	0	0	0	0	0	0	0	2	2	0	0	2	2	2	2	2	0	0	0	2
IAAV4868	2	2	0	0	2	0	0	2	2	2	2	0	2	2	2	2	0	0	2	0	0	0	0	2	0	2	2	2	0	0	0	0	0	0	0	0	2	2	0	0	2	2	2	2	2	0	0	0	2
IAAV5585	2	2	0	0	2	0	0	2	2	2	2	0	2	2	2	2	0	0	2	0	0	0	0	2	0	2	2	2	0	0	0	0	0	0	0	0	2	2	0	0	2	2	2	2	2	0	0	0	2
Kukri_rep_c107624_603	2	2	0	0	2	0	0	2	2	2	2	0	2	2	2	2	0	0	2	0	0	0	0	2	0	2	2	2	0	0	0	0	0	0	0	0	2	2	0	0	2	2	2	2	2	0	0	0	2
RAC875_c20115_1334	2	2	0	0	2	0	0	2	2	2	2	0	2	2	2	2	0	0	2	0	0	0	0	2	0	2	2	2	0	0	0	0	0	0	0	0	2	2	0	0	2	2	2	2	2	0	0	0	2
BS00066218_51	2	2	0	0	2	0	0	2	2	2	2	0	2	2	2	2	0	0	2	0	0	0	0	2	0	2	2	2	0	0	0	0	0	0	0	0	2	2	0	0	2	2	2	2	2	0	0	0	2
BS00063966_51	2	2	0	0	2	0	0	2	2	2	2	0	2	2	2	2	0	0	2	0	0	0	0	2	0	2	2	2	0	0	0	0	0	0	0	0	2	2	0	0	2	2	2	2	2	0	0	0	2
Kukri_c62719_188	2	2	0	0	2	0	0	2	2	2	2	-1	2	2	2	2	0	0	2	0	0	0	0	2	0	2	2	2	0	0	0	0	0	0	0	0	2	2	0	0	2	2	2	2	2	0	0	0	2
Ex_c8890_2370	2	2	0	0	2	0	0	2	2	2	2	0	2	2	2	2	0	0	2	0	0	0	0	2	0	2	2	2	0	0	0	0	0	0	0	0	2	2	0	0	2	2	2	2	2	0	0	0	2
Ku_c15096_3417	2	2	0	0	2	0	0	2	2	2	2	0	2	2	2	2	0	0	2	0	0	0	0	2	0	2	2	2	0	0	0	0	0	0	0	0	2	2	0	0	2	2	2	2	2	0	0	0	2
Kukri_c15096_4174	2	2	0	0	2	0	0	2	2	2	2	0	2	2	2	2	0	0	2	0	0	0	0	2	0	2	2	2	0	0	0	0	0	0	0	0	2	2	0	0	2	2	2	2	2	0	0	0	2
Kukri_rep_c69713_363	2	2	0	0	2	0	0	2	2	2	2	0	2	2	2	2	0	0	2	0	0	0	0	2	0	2	2	2	0	0	0	0	0	0	0	0	2	2	0	0	2	2	2	2	2	0	0	0	2
wsnp_Ex_c51820_55631329	2	2	0	0	2	0	0	2	2	2	2	0	2	2	2	2	0	0	2	0	0	0	0	2	0	2	2	2	0	0	0	0	0	0	0	0	2	2	0	0	2	2	2	2	2	0	0	0	2
wsnp_Ku_c1075_2160065	2	2	0	0	2	0	0	2	2	2	2	0	2	2	2	2	0	0	2	0	0	0	0	2	0	2	2	2	0	0	0	0	0	0	0	0	2	2	0	0	2	2	2	2	2	0	0	0	2
wsnp_Ku_c44079_51438574	2	2	0	0	2	0	0	2	2	2	2	0	2	2	2	2	0	0	2	0	0	0	0	2	0	2	2	2	0	0	0	0	0	0	0	0	2	2	0	0	2	2	2	2	2	0	0	0	2
BS00030448_51	2	2	0	0	2	0	0	2	2	2	2	0	2	2	2	2	0	0	2	0	0	0	0	2	0	2	2	2	0	0	0	0	0	0	0	0	2	2	0	0	2	2	2	2	2	0	0	0	2
Kukri_c15096_4206	2	2	0	0	2	0	0	2	2	2	2	0	2	-1	2	2	0	0	2	0	0	0	0	2	0	2	2	2	0	0	0	0	0	0	0	0	2	2	0	0	2	2	2	2	2	0	0	0	2
wsnp_Ex_c36801_44683992	2	2	0	0	2	0	0	2	2	2	2	0	2	2	2	2	0	0	2	0	0	0	0	2	0	2	2	2	0	0	0	0	0	0	0	0	2	2	0	0	2	2	2	2	2	0	0	0	2
wsnp_Ex_rep_c70951_69806455	2	2	0	0	2	0	0	2	2	2	2	0	2	2	2	2	0	0	2	0	0	0	0	2	0	2	2	2	0	0	0	0	0	0	0	0	2	2	0	0	2	2	2	2	2	0	0	0	2
wsnp_Ku_c15096_23605606	2	2	0	0	2	0	0	2	2	2	2	0	2	2	2	2	0	0	2	0	0	0	0	2	0	2	2	2	0	0	0	0	0	0	0	0	2	2	0	0	2	2	2	2	2	0	0	0	2
BS00042195_51	2	2	0	0	2	0	0	2	2	2	2	0	2	-1	2	2	0	0	2	0	0	0	0	2	0	2	2	2	0	0	0	0	0	0	0	0	2	2	0	0	2	2	2	2	2	0	0	0	2
CAP7_c12484_228	2	2	0	0	2	0	0	2	2	2	2	0	2	2	2	2	0	0	2	0	0	0	0	2	0	2	2	2	0	0	0	0	0	0	0	0	2	2	0	0	2	2	2	2	2	0	0	0	2
Excalibur_c25752_80	2	2	0	0	2	0	0	2	2	2	2	0	2	2	2	2	0	0	2	0	0	0	0	2	0	2	2	2	0	0	0	0	0	0	0	0	2	2	0	0	2	2	2	2	2	0	0	0	2
GENE-4005_179	2	2	0	0	2	0	0	2	2	2	2	0	2	2	2	2	0	0	2	0	0	0	0	2	0	2	2	2	0	0	0	0	0	0	0	0	2	2	0	0	2	2	2	2	2	0	0	0	2
Ku_c44079_365	2	2	0	0	2	0	0	2	2	2	2	0	2	2	2	2	0	0	2	0	0	0	0	2	0	2	2	2	0	0	0	0	0	0	0	0	2	2	0	0	2	2	2	2	2	0	0	0	2
Kukri_rep_c69713_250	2	2	0	0	2	0	0	2	2	2	2	0	2	2	2	2	0	0	2	0	0	0	0	2	0	2	2	2	0	0	0	0	0	0	0	0	2	2	0	0	2	2	2	2	2	0	0	0	2
TA005055-0844	2	2	0	0	2	0	0	2	2	2	2	0	2	-1	2	2	0	0	2	0	0	0	0	2	0	2	2	2	0	0	0	0	0	0	0	0	2	2	0	0	2	2	2	2	2	0	0	0	2
wsnp_Ex_rep_c70951_69806211	2	2	0	0	2	0	0	2	2	2	2	0	2	2	2	2	0	0	2	0	0	0	0	2	0	2	2	2	0	0	0	0	0	0	0	0	2	2	0	0	2	2	2	2	2	0	0	0	2
BobWhite_c13845_195	2	2	0	0	2	0	0	2	2	2	2	0	2	-1	2	2	0	0	2	0	0	0	0	2	0	2	2	2	0	0	0	0	0	0	0	0	2	2	0	0	2	2	2	2	2	0	0	0	2
BobWhite_c2143_229	2	2	0	0	2	0	0	2	2	2	2	0	2	2	2	2	0	0	2	0	0	0	0	2	0	2	2	2	0	0	0	0	0	0	0	0	2	2	0	0	2	2	2	2	2	0	0	0	2
BobWhite_c32372_186	2	2	0	0	2	0	0	2	2	2	2	0	2	-1	2	2	0	0	2	0	0	0	0	2	0	2	2	2	0	0	0	0	0	0	0	0	2	2	0	0	2	2	2	2	2	0	0	0	2
BS00022489_51	2	2	0	0	2	0	0	2	2	2	2	0	2	2	2	2	0	0	2	0	0	0	0	2	0	2	2	2	0	0	0	0	0	0	0	0	2	2	0	0	2	2	2	2	2	0	0	0	2
BS00081699_51	2	2	0	0	2	0	0	2	2	2	2	0	2	2	2	2	0	0	2	0	0	0	0	2	0	2	2	2	0	0	0	0	0	0	0	0	2	2	0	0	2	2	2	2	2	0	0	0	2
BS00082640_51	2	2	0	0	2	0	0	2	2	2	2	0	2	2	2	2	0	0	2	0	0	0	0	2	0	2	2	2	0	0	0	0	0	0	0	0	2	2	0	0	2	2	2	2	2	0	0	0	2
IAAV4068	2	2	0	0	2	0	0	2	2	2	2	0	2	2	2	2	0	0	2	0	0	0	0	2	0	2	2	2	0	0	0	0	0	0	0	0	2	2	0	0	2	2	2	2	2	0	0	0	2
IAAV5761	2	2	0	0	2	0	0	2	2	2	2	0	2	2	2	2	0	0	2	0	0	0	0	2	0	2	2	2	0	0	0	0	0	0	0	0	2	2	0	0	2	2	2	2	2	0	0	0	2
IAAV8730	2	2	0	0	2	0	0	2	2	2	2	0	2	2	2	2	0	0	2	0	0	0	0	2	0	2	2	2	0	0	0	0	0	0	0	0	2	2	0	0	2	2	2	2	2	0	0	0	2
Tdurum_contig69065_319	2	2	0	0	2	0	0	2	2	2	2	0	2	2	2	2	0	0	2	0	0	0	0	2	0	2	2	2	0	0	0	0	0	0	0	0	2	2	0	0	2	2	2	2	2	0	0	0	2
wsnp_Ex_c51820_55631560	2	2	0	0	2	0	0	2	2	2	2	0	2	2	2	2	0	0	2	0	0	0	0	2	0	2	2	2	0	0	0	0	0	0	0	0	2	2	0	0	2	2	2	2	2	0	0	0	2
wsnp_Ku_c14219_22455933	2	2	0	0	2	0	0	2	2	2	2	0	2	-1	2	2	0	0	2	0	0	0	0	2	0	2	2	2	0	0	0	0	0	0	0	0	2	2	0	0	2	2	2	2	2	0	0	0	2
GENE-3904_72	2	2	0	0	2	0	0	2	2	2	2	0	2	-1	2	2	0	0	0	0	0	0	0	2	0	2	2	0	0	0	0	0	0	0	0	0	2	2	-1	0	0	2	2	2	2	0	0	0	2
wsnp_Ex_c17637_26370812	2	2	0	0	2	0	0	2	2	2	2	0	2	2	2	2	0	0	0	0	0	0	0	2	0	2	2	0	0	0	0	0	0	0	0	0	2	2	0	0	0	2	2	2	2	0	0	0	2
RAC875_rep_c113839_352	2	2	0	0	2	0	0	2	2	2	2	0	2	2	2	2	0	0	0	0	0	0	0	2	0	2	2	0	0	0	0	0	0	0	0	0	2	2	0	0	0	2	2	2	2	0	0	0	2
Excalibur_c840_1220	2	2	0	0	2	0	0	2	2	2	2	0	2	2	2	2	0	0	0	0	0	0	0	2	0	2	2	0	0	0	0	0	0	0	0	0	2	2	0	0	0	2	2	2	2	0	0	0	2
IAAV2501	2	2	0	0	2	0	0	2	2	2	2	0	2	2	2	2	0	0	0	0	0	0	0	2	0	2	2	0	0	0	0	0	0	0	0	0	2	2	0	0	0	2	2	2	2	0	0	0	2
Kukri_c34083_349	2	2	0	0	2	0	0	2	2	2	2	0	2	2	2	2	0	0	0	0	0	0	0	2	0	2	2	0	0	0	0	0	0	0	0	0	2	2	0	0	0	2	2	2	2	0	0	0	2
Kukri_c3895_530	2	2	0	0	2	0	0	2	2	2	2	0	2	2	2	2	0	0	0	0	0	0	0	2	0	2	2	0	0	0	0	0	0	0	0	0	2	2	0	0	0	2	2	2	2	0	0	0	2
Tdurum_contig64910_298	2	2	0	0	2	0	0	2	2	2	2	0	2	2	2	2	0	0	0	0	0	0	0	2	0	2	2	0	0	0	0	0	0	0	0	0	2	2	0	0	0	2	2	2	2	0	0	0	2
wsnp_Ex_c26147_35395059	2	2	0	0	2	0	0	2	2	2	2	0	2	2	2	2	0	0	0	0	0	0	0	2	0	2	2	0	0	0	0	0	0	0	0	0	2	2	0	0	0	2	2	2	2	0	0	0	2
wsnp_Ex_c26147_35395259	2	2	0	0	2	0	0	2	2	2	2	0	2	2	2	2	0	0	0	0	0	0	0	2	0	2	2	0	0	0	0	0	0	0	0	0	2	2	0	0	0	2	2	2	2	0	0	0	2
Excalibur_c2737_309	2	2	0	0	2	2	0	2	2	0	0	0	2	2	2	0	2	0	0	2	0	0	0	0	0	2	2	0	2	2	0	0	0	0	2	0	2	2	2	0	0	2	2	2	2	2	2	0	2
BobWhite_c1131_328	2	2	0	0	2	2	0	2	2	0	0	0	-1	2	2	0	2	0	0	2	0	2	0	0	0	2	2	0	2	2	0	0	0	0	2	0	2	2	2	0	0	2	2	2	2	2	2	0	2
Tdurum_contig97355_136	2	2	0	0	2	2	0	2	2	0	0	0	2	-1	-1	0	2	0	0	2	0	-1	0	0	0	2	2	0	2	2	0	0	0	0	2	0	2	2	2	0	0	2	2	2	2	2	2	0	2
Tdurum_contig97355_194	2	2	0	0	2	2	0	2	2	0	0	0	2	2	-1	0	2	0	0	2	0	2	0	0	0	2	2	0	2	2	0	0	0	0	2	0	2	2	2	0	0	2	2	2	2	2	2	0	2
Excalibur_c29639_65	0	2	0	0	2	2	0	2	2	0	0	0	0	2	0	0	0	0	0	0	0	2	0	0	0	2	2	0	0	0	0	0	0	0	0	0	2	2	2	0	0	2	2	-1	0	2	2	0	2
Tdurum_contig29357_338	0	2	0	0	2	2	0	2	2	0	0	0	0	2	0	0	0	0	0	0	0	2	0	0	0	2	2	0	0	0	0	0	0	0	0	0	2	2	2	0	0	2	2	-1	0	2	2	0	2
Tdurum_contig13068_208	0	2	0	0	2	2	0	2	2	0	0	0	0	2	0	0	0	0	0	0	0	2	0	0	0	2	2	0	0	0	0	0	0	0	0	0	2	2	2	0	0	2	2	2	0	2	2	0	2
RFL_Contig5037_560	0	2	0	0	2	2	0	2	2	0	0	0	0	2	0	0	0	0	0	0	0	2	0	0	0	2	2	0	0	0	0	0	0	0	0	0	2	2	2	0	0	2	2	2	0	2	2	0	2
RAC875_c93959_96	0	2	0	0	2	2	0	2	2	0	0	0	0	2	0	0	0	0	0	0	0	2	0	0	0	2	2	0	0	0	0	0	0	0	0	0	2	2	2	0	0	2	2	-1	0	2	2	0	2
Tdurum_contig32258_314	0	2	0	0	2	2	0	2	2	0	0	0	0	2	0	0	0	0	0	0	0	2	0	0	0	2	2	0	0	0	0	0	0	0	0	0	2	2	2	0	0	2	2	-1	0	2	2	0	2
BS00021965_51	0	2	0	0	2	2	0	2	2	0	0	0	0	2	0	0	0	0	0	0	0	2	0	0	0	2	2	0	0	0	0	0	0	0	0	0	2	2	2	0	0	0	2	-1	0	2	2	0	2
Excalibur_rep_c69981_75	0	2	0	0	2	2	0	2	2	0	0	0	0	2	0	0	0	0	0	0	0	2	0	0	0	2	2	0	0	0	0	0	0	0	0	0	2	2	2	0	0	0	2	2	0	2	2	0	2
Kukri_rep_c70063_663	0	2	2	0	2	2	0	2	2	0	0	0	0	2	0	0	0	0	0	0	0	0	0	0	0	2	2	0	0	2	0	0	0	0	0	0	2	2	2	0	0	0	2	2	0	2	2	0	2
BS00003185_51	0	2	2	0	2	2	0	2	2	0	0	0	0	2	0	0	0	0	0	0	0	0	0	0	0	2	2	0	0	2	0	0	0	0	0	0	2	2	2	0	0	0	2	-1	0	0	2	0	2
Ra_c3533_880	0	2	2	0	2	2	0	2	2	0	0	0	0	2	-1	0	0	0	0	0	0	0	0	0	0	2	2	2	0	2	0	0	0	0	0	0	2	2	2	0	2	0	2	-1	0	-1	2	0	2
wsnp_Ex_c20457_29526403	0	2	2	0	2	2	0	2	2	0	0	0	0	-1	-1	0	0	0	0	0	0	0	0	0	0	2	2	2	0	2	0	0	0	0	0	0	2	2	2	0	2	0	0	-1	0	-1	2	0	2
Kukri_c57452_1040	0	2	2	0	2	2	0	2	-1	0	0	0	0	-1	-1	0	0	0	0	0	0	0	0	0	0	2	2	2	0	2	0	0	0	0	0	0	2	2	2	0	2	0	0	-1	0	2	2	0	2
wsnp_Ex_rep_c101766_87073440	0	2	2	0	2	2	0	2	-1	0	0	0	0	-1	-1	0	0	0	0	0	0	0	0	0	0	2	2	2	0	2	0	0	0	0	0	0	2	2	2	0	2	0	0	-1	0	2	2	0	2
wsnp_Ex_rep_c67436_66026057	0	2	2	0	2	2	0	2	-1	0	0	0	0	-1	-1	0	0	0	0	0	0	0	0	0	2	2	2	2	0	2	2	0	0	0	0	0	2	2	2	0	2	0	0	-1	0	2	2	0	2
wsnp_Ra_c5346_9501281	0	2	2	0	2	2	0	2	2	0	0	0	0	2	2	0	0	0	0	0	0	0	0	0	2	2	2	2	0	2	2	0	0	0	0	0	2	2	2	0	2	0	0	-1	0	2	2	0	2
Tdurum_contig42520_585	0	2	2	0	2	2	0	2	2	0	0	0	0	-1	2	0	0	0	0	0	0	0	0	0	2	2	2	2	0	2	2	0	0	0	0	0	2	2	2	0	2	0	0	2	0	2	2	0	2
Excalibur_c29240_233	0	2	2	0	2	2	0	2	2	0	0	0	0	0	2	0	0	0	0	0	0	0	0	0	2	2	2	2	0	0	2	0	2	0	0	0	2	2	2	0	2	0	0	2	0	2	2	0	2
Kukri_c11568_796	0	2	2	0	2	2	0	2	-1	0	0	0	0	0	-1	0	0	0	0	0	0	0	0	0	2	2	2	2	0	0	2	0	2	0	0	0	2	2	2	0	2	0	0	-1	0	2	2	0	2
RAC875_c60623_72	0	2	2	0	2	2	0	2	2	0	0	0	0	0	2	0	0	0	0	0	0	0	0	0	2	2	2	2	0	0	2	0	2	0	0	0	2	2	2	0	2	0	0	2	0	2	2	0	2
Kukri_rep_c95718_868	0	2	2	0	2	2	0	2	2	0	0	0	0	2	-1	0	0	0	0	0	0	0	0	0	2	2	2	2	0	0	2	0	2	0	0	0	2	2	2	0	2	0	0	-1	0	2	2	0	2
RAC875_c103443_475	0	2	2	0	2	2	0	2	2	0	0	0	0	-1	2	0	0	0	0	0	0	0	0	0	2	2	2	2	0	0	2	0	2	0	0	0	2	2	2	0	2	0	0	2	0	2	2	0	2
BS00103442_51	0	2	2	0	2	2	0	2	2	0	0	0	0	2	-1	0	0	0	0	0	0	0	0	0	2	2	2	2	0	0	2	0	2	0	0	0	2	2	2	0	2	0	0	-1	0	2	2	0	2
RAC875_rep_c74051_276	0	2	2	0	2	2	0	2	2	0	0	0	0	2	2	0	0	0	0	0	0	0	0	0	2	2	2	2	0	0	2	0	2	0	0	0	2	2	2	0	2	0	0	2	0	2	2	0	2
RFL_Contig6053_2072	0	2	2	0	2	2	0	2	2	0	0	0	0	2	2	0	0	0	0	0	0	0	0	0	2	2	2	2	0	2	2	0	2	0	0	0	2	2	2	0	2	0	0	2	0	2	2	0	2
RFL_Contig6053_3082	0	2	2	0	2	2	0	2	2	0	0	0	0	2	2	0	0	0	0	0	0	0	0	0	2	2	2	2	0	2	2	0	2	0	0	0	2	2	2	0	2	0	0	2	0	2	2	0	2
Tdurum_contig75700_411	0	2	2	0	2	2	0	2	2	0	0	0	0	2	-1	0	0	0	0	0	0	0	0	0	2	2	2	2	0	2	2	0	2	0	0	0	0	2	2	0	2	0	0	-1	0	2	2	0	2
BobWhite_c27145_731	0	2	2	0	2	2	0	2	2	0	0	0	0	2	-1	0	0	0	0	0	0	0	0	0	2	2	2	2	0	2	2	0	2	0	0	0	0	2	2	0	2	0	0	-1	0	2	2	0	2
BS00004466_51	0	2	2	0	2	2	0	2	2	0	0	0	0	2	-1	0	0	0	0	0	0	0	0	0	2	2	2	2	0	2	2	0	2	0	0	0	0	2	2	0	2	0	0	-1	0	2	2	0	2
wsnp_BE489894A_Ta_2_1	0	2	2	0	2	2	0	2	-1	0	0	0	0	-1	-1	0	2	0	0	0	0	0	0	0	2	2	2	2	0	0	2	0	2	0	0	0	0	2	2	0	2	0	0	-1	0	2	2	0	2
wsnp_Ku_c1318_2624758	0	2	2	0	2	2	0	2	2	0	0	0	0	2	2	0	2	0	0	0	0	0	0	0	2	2	2	2	0	0	2	0	2	0	0	0	0	2	2	0	2	0	0	2	0	2	2	0	2
BS00029127_51	0	2	2	0	2	2	0	2	2	0	0	0	0	2	2	0	2	0	0	0	0	0	0	0	2	2	2	2	0	0	2	0	2	0	0	0	0	2	2	0	2	0	0	2	0	2	2	0	2
Tdurum_contig51566_427	0	2	2	0	2	2	0	2	2	0	0	0	0	-1	-1	0	2	0	0	0	0	0	0	0	2	2	2	2	0	0	2	0	2	0	0	0	0	2	2	0	2	0	0	-1	0	2	2	0	2
Tdurum_contig51566_561	0	2	2	0	2	2	0	2	-1	0	0	0	0	-1	-1	0	2	0	0	0	0	0	0	0	2	2	2	2	0	0	2	0	2	0	0	0	0	2	2	0	2	0	0	-1	0	2	2	0	2
Excalibur_c55844_143	0	2	2	0	2	2	0	2	-1	0	0	0	0	-1	-1	0	2	0	0	0	0	0	0	0	2	2	2	2	0	0	2	0	2	0	0	0	0	2	2	0	2	0	0	-1	0	2	2	0	2
GENE-4222_1080	2	2	2	2	2	2	2	2	-1	0	0	2	0	-1	-1	0	2	2	0	0	0	0	0	0	2	2	0	2	0	0	2	2	2	0	0	0	0	2	2	0	2	0	0	-1	0	2	2	0	0
RAC875_c48687_681	2	2	2	2	2	2	2	2	-1	0	0	2	0	2	-1	0	2	2	0	0	0	0	0	0	2	2	0	2	0	2	2	2	2	0	0	0	0	2	2	0	2	0	0	2	0	2	2	0	0
wsnp_RFL_Contig2765_2513854	2	2	2	2	2	2	2	2	2	0	0	2	0	2	2	0	2	2	0	0	0	0	0	0	2	2	0	2	0	2	2	2	2	0	0	0	0	2	2	0	2	0	0	2	0	2	2	0	0
BobWhite_rep_c51132_85	2	2	2	2	2	2	2	2	2	0	0	2	0	2	2	0	2	2	0	0	0	0	0	0	2	2	0	2	0	2	2	2	2	0	0	0	0	2	2	0	2	0	0	2	0	2	2	0	0
BS00088274_51	2	2	2	2	2	2	2	2	2	0	0	2	0	2	2	0	2	2	0	0	0	0	0	0	2	2	0	2	0	2	2	2	2	0	0	0	0	2	2	0	2	0	0	2	0	2	2	0	0
CAP8_c6448_265	2	2	2	2	2	2	2	2	2	0	0	2	0	2	2	0	2	2	0	0	0	0	0	0	2	2	0	2	0	2	2	2	2	0	0	0	0	2	2	0	2	0	0	2	0	2	2	0	0
Excalibur_c25390_2483	2	2	2	2	2	2	2	2	2	0	0	2	0	-1	2	0	2	2	0	0	0	0	0	0	2	2	0	2	0	2	2	2	2	0	0	0	0	2	2	0	2	0	0	2	0	2	2	0	0
Excalibur_c30234_130	2	2	2	2	2	2	2	2	-1	0	0	2	0	2	2	0	2	2	0	0	0	0	0	0	2	2	0	2	0	2	2	2	2	0	0	0	0	2	2	0	2	0	0	-1	0	2	2	0	0
RFL_Contig2765_1200	2	2	2	2	2	2	2	2	2	0	0	2	0	2	2	0	2	2	0	0	0	0	0	0	2	2	0	2	0	-1	2	2	2	0	0	0	0	2	2	0	2	0	0	2	0	2	2	0	0
RFL_Contig2765_669	2	2	2	2	2	2	2	2	-1	0	0	2	0	2	-1	0	2	2	0	0	0	0	0	0	2	2	0	2	0	2	2	2	2	0	0	0	0	2	2	0	2	0	0	-1	0	2	2	0	0
RFL_Contig3175_1217	2	2	2	2	2	2	2	2	2	0	0	2	0	2	2	0	2	2	0	0	0	0	0	0	2	2	0	2	0	2	2	2	2	0	0	0	0	2	2	0	2	0	0	2	0	2	2	0	0
RFL_Contig3175_482	2	2	2	2	2	2	2	2	2	0	0	2	0	2	2	0	2	2	0	0	0	0	0	0	2	2	0	2	0	2	2	2	2	0	0	0	0	2	2	0	2	0	0	2	0	2	2	0	0
wsnp_RFL_Contig3175_3154256	2	2	2	2	2	2	2	2	2	0	0	2	0	2	-1	0	2	2	0	0	0	0	0	0	2	2	0	2	0	2	2	2	2	0	0	0	0	2	2	0	2	0	0	2	0	2	2	0	0
GENE-3976_118	2	2	2	2	2	2	2	2	2	0	0	2	0	2	2	0	2	2	0	0	0	0	0	0	2	2	0	2	0	2	2	2	2	0	0	0	0	2	2	0	2	0	0	2	0	2	2	0	0
RFL_Contig2765_2274	2	2	2	2	2	2	2	2	2	0	0	2	0	2	2	0	2	2	0	0	0	0	0	0	2	2	0	2	0	2	2	2	2	0	0	0	0	2	2	0	2	0	0	2	0	2	2	0	0
BobWhite_c35035_85	2	2	2	2	2	2	2	2	2	0	0	2	0	-1	-1	0	2	2	0	0	0	0	0	0	2	0	0	2	0	-1	2	2	2	0	0	0	0	0	2	0	2	0	0	-1	0	2	2	0	0
RAC875_c13595_669	2	2	2	2	2	2	2	2	2	0	0	2	0	2	2	0	2	2	0	0	0	0	0	0	2	0	0	2	0	0	2	2	2	0	0	0	0	0	2	0	2	0	0	2	0	2	2	0	0
RAC875_c26158_929	2	2	2	2	2	2	2	2	2	0	0	2	0	2	2	0	2	2	0	0	0	0	0	0	2	0	0	2	0	0	2	2	2	0	0	0	0	0	2	0	2	0	0	-1	0	2	2	0	0
wsnp_CAP12_rep_c4048_1842112	2	2	2	2	2	2	2	2	2	0	0	2	0	2	-1	0	2	2	0	0	0	0	0	0	2	0	0	2	0	0	2	2	2	0	0	0	0	0	2	0	2	0	0	-1	0	2	2	0	0
BobWhite_c40602_313	2	2	2	2	2	2	2	2	2	0	0	2	0	2	2	0	2	2	0	0	0	0	0	0	2	0	0	2	0	0	2	2	2	0	0	0	0	0	2	0	2	0	0	-1	0	2	2	0	0
D_contig32490_278	2	2	2	2	2	2	2	2	-1	0	0	2	0	2	2	0	2	2	0	0	0	0	0	0	2	0	0	2	0	-1	2	2	2	0	0	0	0	0	2	0	2	0	0	2	0	2	2	0	0
Excalibur_rep_c103232_355	2	2	2	2	2	2	2	2	2	0	0	2	0	-1	2	0	2	2	0	0	0	0	0	0	2	0	0	2	0	0	2	2	2	0	0	0	0	0	2	0	2	0	0	2	0	2	2	0	0
RAC875_c27781_591	2	2	2	2	2	2	2	2	2	0	0	2	0	2	2	0	2	2	0	0	0	0	0	0	2	0	0	2	0	0	2	2	2	0	0	0	0	0	2	0	2	0	0	2	0	2	2	0	0
Tdurum_contig11275_461	2	2	2	2	2	2	2	2	2	0	0	2	0	2	-1	0	2	2	0	0	0	0	0	0	2	0	0	2	0	2	2	2	2	0	0	0	0	0	2	0	2	0	0	-1	0	2	2	0	0
Tdurum_contig97520_902	2	2	2	2	2	2	2	2	2	0	0	2	0	2	2	0	2	2	0	0	0	0	0	0	2	0	0	2	0	2	2	2	2	0	0	0	0	0	2	0	2	0	0	2	0	2	2	0	0
tplb0026o20_691	2	2	2	2	2	2	2	2	2	0	0	2	0	2	2	0	2	2	0	0	0	0	0	0	2	0	0	2	0	0	2	2	2	0	0	0	0	0	2	0	2	0	0	2	0	2	2	0	0
BobWhite_c9681_769	2	2	2	2	2	2	2	2	2	0	0	2	0	2	-1	0	2	2	0	0	0	0	0	0	2	0	0	2	0	-1	2	2	2	0	0	0	0	0	2	0	2	0	0	-1	0	2	2	0	0
BobWhite_c13504_378	2	2	2	2	2	2	2	2	2	0	0	2	0	2	2	0	2	2	0	0	0	0	0	0	2	0	0	2	0	-1	2	2	2	0	0	0	0	0	2	0	2	0	0	2	0	2	2	0	0
BobWhite_c24258_496	2	2	2	2	2	2	2	2	2	0	0	2	0	2	2	0	2	2	0	0	0	0	0	0	2	0	0	2	0	2	2	2	2	0	0	0	0	0	2	0	2	0	0	2	0	2	2	0	0
BobWhite_c37804_181	2	2	2	2	2	2	2	2	2	0	0	2	0	2	-1	0	2	2	0	0	0	0	0	0	2	0	0	2	0	2	2	2	2	0	0	0	0	0	2	0	2	0	0	-1	0	2	2	0	0
BS00003485_51	2	2	2	2	2	2	2	2	2	0	0	2	0	2	2	0	2	2	0	0	0	0	0	0	2	0	0	2	0	2	2	2	2	0	0	0	0	0	2	0	2	0	0	-1	0	2	2	0	0
BS00017018_51	2	2	2	2	2	2	2	2	2	0	0	2	0	2	-1	0	2	2	0	0	0	0	0	0	2	0	0	2	0	2	2	2	2	0	0	0	0	0	2	0	2	0	0	-1	0	2	2	0	0
BS00022362_51	2	2	2	2	2	2	2	2	2	0	0	2	0	2	2	0	2	2	0	0	0	0	0	0	2	0	0	2	0	2	2	2	2	0	0	0	0	0	2	0	2	0	0	2	0	2	2	0	0
BS00064182_51	2	2	2	2	2	2	2	2	2	0	0	2	0	2	-1	0	2	2	0	0	0	0	0	0	2	0	0	2	0	2	2	2	2	0	0	0	0	0	2	0	2	0	0	2	0	2	2	0	0
BS00071855_51	2	2	2	2	2	2	2	2	2	0	0	2	0	2	2	0	2	2	0	0	0	0	0	0	2	0	0	2	0	2	2	2	2	0	0	0	0	0	2	0	2	0	0	2	0	2	2	0	0
BS00078214_51	2	2	2	2	2	2	2	2	2	0	0	2	0	2	-1	0	2	2	0	0	0	0	0	0	2	0	0	2	0	2	2	2	2	0	0	0	0	0	2	0	2	0	0	-1	0	2	2	0	0
BS00080394_51	2	2	2	2	2	2	2	2	2	0	0	2	0	2	2	0	2	2	0	0	0	0	0	0	2	0	0	2	0	2	2	2	2	0	0	0	0	0	2	0	2	0	0	2	0	2	2	0	0
BS00080399_51	2	2	2	2	2	2	2	2	2	0	0	2	0	2	2	0	2	2	0	0	0	0	0	0	2	0	0	2	0	2	2	2	2	0	0	0	0	0	2	0	2	0	0	-1	0	2	2	0	0
BS00091539_51	2	2	2	2	2	2	2	2	2	0	0	2	0	2	2	0	2	2	0	0	0	0	0	0	2	0	0	2	0	2	2	2	2	0	0	0	0	0	2	0	2	0	0	-1	0	2	2	0	0
BS00093844_51	2	2	2	2	2	2	2	2	2	0	0	2	0	2	-1	0	2	2	0	0	0	0	0	0	2	0	0	2	0	2	2	2	2	0	0	0	0	0	2	0	2	0	0	-1	0	2	2	0	0
BS00099879_51	2	2	2	2	2	2	2	2	2	0	0	2	0	2	-1	0	2	2	0	0	0	0	0	0	2	0	0	2	0	2	2	2	2	0	0	0	0	0	2	0	2	0	0	-1	0	2	2	0	0
CAP7_rep_c6384_381	2	2	2	2	2	2	2	2	2	0	0	2	0	2	2	0	2	2	0	0	0	0	0	0	2	0	0	2	0	2	2	2	2	0	0	0	0	0	2	0	2	0	0	2	0	2	2	0	0
D_GDEEGVY02GMZ4L_337	2	2	2	2	2	2	2	2	2	0	0	2	0	2	2	0	2	2	0	0	0	0	0	0	2	0	0	2	0	2	2	2	2	0	0	0	0	0	2	0	2	0	0	2	0	2	2	0	0
Excalibur_c19182_226	2	2	2	2	2	2	2	2	2	0	0	2	0	2	-1	0	2	2	0	0	0	0	0	0	2	0	0	2	0	2	2	2	2	0	0	0	0	0	2	0	2	0	0	-1	0	2	2	0	0
GENE-3852_1100	2	2	2	2	2	2	2	2	2	0	0	2	0	2	-1	0	2	2	0	0	0	0	0	0	2	0	0	2	0	2	2	2	2	0	0	0	0	0	2	0	2	0	0	-1	0	2	2	0	0
GENE-3852_857	2	2	2	2	2	2	2	2	2	0	0	2	0	2	2	0	2	2	0	0	0	0	0	0	2	0	0	2	0	2	2	2	2	0	0	0	0	0	2	0	2	0	0	-1	0	2	2	0	0
GENE-3862_103	2	2	2	2	2	2	2	2	2	0	0	2	0	2	-1	0	2	2	0	0	0	0	0	0	2	0	0	2	0	2	2	2	2	0	0	0	0	0	2	0	2	0	0	-1	0	2	2	0	0
GENE-3862_178	2	2	2	2	2	2	2	2	2	0	0	2	0	-1	-1	0	2	2	0	0	0	0	0	0	2	0	0	2	0	2	2	2	2	0	0	0	0	0	2	0	2	0	0	-1	0	2	2	0	0
GENE-3862_349	2	2	2	2	2	2	2	2	2	0	0	2	0	2	-1	0	2	2	0	0	0	0	0	0	2	0	0	2	0	2	2	2	2	0	0	0	0	0	2	0	2	0	0	-1	0	2	2	0	0
GENE-3871_109	2	2	2	2	2	2	2	2	2	0	0	2	0	2	-1	0	2	2	0	0	0	0	0	0	2	0	0	2	0	2	2	2	2	0	0	0	0	0	2	0	2	0	0	-1	0	2	2	0	0
GENE-3871_337	2	2	2	2	2	2	2	2	2	0	0	2	0	2	-1	0	2	2	0	0	0	0	0	0	2	0	0	2	0	2	2	2	2	0	0	0	0	0	2	0	2	0	0	-1	0	2	2	0	0
GENE-3933_586	2	2	2	2	2	2	2	2	2	0	0	2	0	2	2	0	2	2	0	0	0	0	0	0	2	0	0	2	0	2	2	2	2	0	0	0	0	0	2	0	2	0	0	2	0	2	2	0	0
GENE-3948_357	2	2	2	2	2	2	2	2	2	0	0	2	0	2	-1	0	2	2	0	0	0	0	0	0	2	0	0	2	0	2	2	2	2	0	0	0	0	0	2	0	2	0	0	2	0	2	2	0	0
GENE-3988_79	2	2	2	2	2	2	2	2	2	0	0	2	0	2	2	0	2	2	0	0	0	0	0	0	2	0	0	2	0	2	2	2	2	0	0	0	0	0	2	0	2	0	0	2	0	2	2	0	0
IAAV7160	2	2	2	2	2	2	2	2	2	0	0	2	0	2	-1	0	2	2	0	0	0	0	0	0	2	0	0	2	0	2	2	2	2	0	0	0	0	0	2	0	2	0	0	-1	0	2	2	0	0
Kukri_c30754_229	2	2	2	2	2	2	2	2	2	0	0	2	0	2	2	0	2	2	0	0	0	0	0	0	2	0	0	2	0	2	2	2	2	0	0	0	0	0	2	0	2	0	0	2	0	2	2	0	0
Kukri_c45702_439	2	2	2	2	2	2	2	2	2	0	0	2	0	2	2	0	2	2	0	0	0	0	0	0	2	0	0	2	0	2	2	2	2	0	0	0	0	0	2	0	2	0	0	2	0	2	2	0	0
Kukri_rep_c106022_483	2	2	2	2	2	2	2	2	2	0	0	2	0	2	2	0	2	2	0	0	0	0	0	0	2	0	0	2	0	2	2	2	2	0	0	0	0	0	2	0	2	0	0	2	0	2	2	0	0
Kukri_rep_c70994_104	2	2	2	2	2	2	2	2	2	0	0	2	0	2	-1	0	2	2	0	0	0	0	0	0	2	0	0	2	0	2	2	2	2	0	0	0	0	0	2	0	2	0	0	-1	0	2	2	0	0
RAC875_c13595_438	-1	2	2	2	2	2	2	2	2	0	0	2	0	2	-1	0	2	2	0	0	0	0	0	0	2	0	0	2	0	2	2	2	2	0	0	0	0	0	2	0	2	0	0	2	0	2	2	0	0
RAC875_c28339_128	2	2	2	2	2	2	2	2	2	0	0	2	0	2	2	0	2	2	0	0	0	0	0	0	2	0	0	2	0	2	2	2	2	0	0	0	0	0	2	0	2	0	0	-1	0	2	2	0	0
RAC875_c77791_840	2	2	2	2	2	2	2	2	2	0	0	2	0	2	2	0	2	2	0	0	0	0	0	0	2	0	0	2	0	2	2	2	2	0	0	0	0	0	2	0	2	0	0	2	0	2	2	0	0
wsnp_Ex_c749_1472258	2	2	2	2	2	2	2	2	2	0	0	2	0	0	0	0	2	2	0	0	0	0	0	0	2	0	0	2	0	-1	2	2	2	0	0	0	0	0	2	0	2	0	0	2	0	2	2	0	0
RFL_Contig5262_1500	2	2	2	2	2	2	2	2	2	0	0	2	0	-1	-1	0	2	2	0	0	0	0	0	0	2	0	0	2	0	2	2	2	2	0	0	0	0	0	2	0	2	0	0	-1	0	2	2	0	0
Excalibur_rep_c69900_395	2	2	2	2	2	2	2	2	2	0	0	2	0	-1	2	0	2	2	0	0	0	0	0	0	2	0	0	2	0	2	2	2	2	0	0	0	0	0	2	0	2	0	0	2	0	2	2	0	0
Excalibur_c5168_1807	2	2	2	2	2	2	2	2	2	0	0	2	0	2	2	0	2	2	0	0	0	0	0	0	2	0	0	2	0	-1	2	2	2	0	0	0	0	0	2	0	2	0	0	-1	0	2	2	0	0
Kukri_c1468_1609	2	2	2	2	2	2	2	2	2	0	0	2	0	0	2	0	2	2	0	0	0	0	0	0	2	0	0	2	0	2	2	2	2	0	0	0	0	0	2	0	2	0	0	2	0	2	2	0	0
Kukri_c1468_1748	2	2	2	2	2	2	2	2	2	0	0	2	0	-1	2	0	2	2	0	0	0	0	0	0	2	0	0	2	0	-1	2	2	2	0	0	0	0	0	2	0	2	0	0	2	0	2	2	0	0
Kukri_c41482_311	2	2	2	2	2	2	2	2	2	0	0	2	0	-1	-1	0	2	2	0	0	0	0	0	0	2	0	0	2	0	0	2	2	2	0	0	0	0	0	2	0	2	0	0	-1	0	2	2	0	0
wsnp_JD_rep_c65886_41872083	2	2	2	2	2	2	2	2	2	0	0	2	0	-1	2	0	2	2	0	0	0	0	0	0	2	0	0	2	0	0	2	2	2	0	0	0	0	0	2	0	2	0	0	2	0	2	2	0	0
Excalibur_rep_c90454_251	2	2	2	2	2	2	2	2	2	0	0	2	0	-1	-1	0	2	2	0	0	0	0	0	0	2	0	0	2	0	0	2	2	2	0	0	0	0	0	2	0	2	0	0	-1	0	2	2	0	0
Ra_c3356_506	2	2	2	2	2	2	2	2	2	0	0	2	0	2	2	0	2	2	0	0	0	0	0	0	2	0	0	2	0	-1	2	2	2	0	0	0	0	0	2	0	2	0	0	2	0	2	2	0	0
RAC875_c79898_255	2	2	2	2	2	2	2	2	2	0	0	2	0	-1	2	0	2	2	0	0	0	0	0	0	2	0	0	2	0	0	2	2	2	0	0	0	0	0	2	0	2	0	0	2	0	2	2	0	0
wsnp_Ku_c1468_2912654	2	2	2	2	2	2	2	2	2	0	0	2	0	-1	2	0	2	2	0	0	0	0	0	0	2	0	0	2	0	0	2	2	2	0	0	0	0	0	2	0	2	0	0	2	0	2	2	0	0
wsnp_Ku_c1468_2913072	2	2	2	2	2	2	2	2	2	0	0	2	0	-1	-1	0	2	2	0	0	0	0	0	0	2	0	0	2	0	-1	2	2	2	0	0	0	0	0	2	0	2	0	0	-1	0	2	2	0	0
IAAV5595	2	2	2	2	2	2	2	2	2	0	0	2	0	-1	-1	0	2	2	0	0	0	0	0	0	2	0	0	2	0	0	2	2	2	0	0	0	0	0	2	0	2	0	0	-1	0	2	2	0	0
Jagger_c7132_108	2	2	2	2	2	2	2	2	2	0	0	2	0	-1	-1	0	2	2	0	0	0	0	0	0	2	0	0	2	0	-1	2	2	2	0	0	0	0	0	2	0	2	0	0	-1	0	2	2	0	0
RAC875_c23449_205	2	2	2	2	2	2	2	2	2	0	0	2	0	-1	-1	0	2	2	0	0	0	0	0	0	2	0	0	2	0	0	2	2	2	0	0	0	0	0	2	0	2	0	0	-1	0	2	2	0	0
IAAV5969	2	2	2	2	2	2	2	2	2	0	0	2	0	-1	-1	0	2	2	0	0	0	0	0	0	2	0	0	2	0	0	2	2	2	0	0	0	0	0	2	0	2	0	0	-1	0	2	2	0	0
Kukri_c29930_72	2	2	2	2	2	2	2	2	2	0	0	2	0	-1	-1	0	2	2	0	0	0	0	0	0	2	0	0	2	0	0	2	2	2	0	0	0	0	0	2	0	2	0	0	-1	0	2	2	0	0
Ra_c1709_839	2	2	2	2	2	2	2	2	2	0	0	2	0	-1	-1	0	2	2	0	0	0	0	0	0	2	0	0	2	0	0	2	2	2	0	0	0	0	0	2	0	2	0	0	-1	0	2	2	0	0
Tdurum_contig83542_138	2	2	2	2	2	2	2	2	2	0	0	2	0	0	2	0	2	2	0	0	0	0	0	0	2	0	0	2	0	0	2	2	2	0	0	0	0	0	2	0	2	0	0	2	0	2	2	0	0
BS00057487_51	2	2	2	2	2	2	2	2	2	0	0	2	0	2	2	0	2	2	0	0	0	0	0	0	2	0	0	2	0	2	2	2	2	0	0	0	0	0	2	0	2	0	0	2	0	2	2	0	0
wsnp_Ex_c26771_35998435	2	2	2	2	2	2	2	2	2	0	0	2	0	-1	2	0	2	2	0	0	0	0	0	0	2	0	0	2	0	0	2	2	2	0	0	0	0	0	2	0	2	0	0	2	0	2	2	0	0
BobWhite_c10832_1131	2	2	2	2	2	2	2	2	2	0	0	2	0	-1	-1	0	2	2	0	0	0	0	0	0	2	0	0	2	0	0	2	2	2	0	0	0	0	0	2	0	2	0	0	-1	0	2	2	0	0
BS00040814_51	2	2	2	2	2	2	2	2	2	0	0	2	0	2	2	0	2	2	0	0	0	0	0	0	2	0	0	2	0	0	2	2	2	0	0	0	0	0	2	0	2	0	0	-1	0	2	2	0	0
BS00046261_51	2	2	2	2	2	2	2	2	2	0	0	2	0	-1	2	0	2	2	0	0	0	0	0	0	2	0	0	2	0	0	2	2	2	0	0	0	0	0	2	0	2	0	0	2	0	2	2	0	0
Kukri_c40994_61	2	2	2	2	2	2	2	2	2	0	0	2	0	-1	-1	0	2	2	0	0	0	0	0	0	2	0	0	2	0	-1	2	2	2	0	0	0	0	0	2	0	2	0	0	-1	0	2	2	0	0
RAC875_c76675_372	2	2	2	2	2	2	2	2	2	0	0	2	0	-1	-1	0	2	2	0	0	0	0	0	0	2	0	0	2	0	-1	2	2	2	0	0	0	0	0	2	0	2	0	0	-1	0	2	2	0	0
RFL_Contig4069_2628	2	2	2	2	2	2	2	2	2	0	0	2	0	-1	2	0	2	2	0	0	0	0	0	0	2	0	0	2	0	0	2	2	2	0	0	0	0	0	2	0	2	0	0	2	0	2	2	0	0
CAP8_c4108_169	2	2	2	2	2	2	2	2	2	0	0	2	0	2	2	0	2	2	0	0	0	0	0	0	2	0	0	2	0	-1	2	2	2	0	0	0	0	0	2	0	2	0	0	2	0	2	2	0	0
BobWhite_c10343_320	2	2	2	2	2	2	2	2	2	0	0	2	0	-1	2	0	2	2	0	0	0	0	0	0	2	0	0	2	0	0	2	2	2	0	0	0	0	0	2	0	2	0	0	-1	0	2	2	0	0
GENE-1205_484	2	2	2	2	2	2	2	2	2	0	0	2	0	-1	-1	0	2	2	0	0	0	0	0	0	2	0	0	2	0	0	2	2	2	0	0	0	0	0	2	0	2	0	0	-1	0	2	2	0	0
IAAV8380	2	2	2	2	2	2	2	2	2	0	0	2	0	-1	-1	0	2	2	0	0	0	0	0	0	2	0	0	2	0	0	2	2	2	0	0	0	0	0	2	0	2	0	0	-1	0	2	2	0	0
Jagger_c1423_102	2	2	2	2	2	2	2	2	2	0	0	2	0	-1	-1	0	2	2	0	0	0	0	0	0	2	0	0	2	0	0	2	2	2	0	0	0	0	0	2	0	2	0	0	-1	0	2	2	0	0
wsnp_Ex_c15708_24056750	2	2	2	2	2	2	2	2	2	0	0	2	0	-1	-1	0	2	2	0	0	0	0	0	0	2	0	0	2	0	0	2	2	2	0	0	0	0	0	2	0	2	0	0	-1	0	2	2	0	0
Excalibur_c48282_143	2	2	2	2	2	2	2	2	2	0	0	2	0	0	2	0	2	2	0	0	0	0	0	0	2	0	0	2	0	0	2	2	2	0	0	0	0	0	2	0	2	0	0	2	0	2	2	0	0
Tdurum_contig83087_104	2	2	2	2	2	2	2	2	2	0	0	2	0	2	-1	0	2	2	0	0	0	0	0	0	2	0	0	2	0	2	2	2	2	0	0	0	0	0	2	0	2	0	0	-1	0	2	2	0	0
BS00053588_51	2	2	2	2	2	2	2	2	2	0	0	2	0	-1	-1	0	2	2	0	0	0	0	0	0	2	0	0	2	0	2	2	2	2	0	0	0	0	0	2	0	2	0	0	2	2	2	2	0	0
TA004471-1240	2	2	2	2	2	2	2	2	2	0	0	2	0	-1	2	0	2	2	0	0	0	0	0	0	2	0	0	2	0	0	2	2	2	0	0	0	0	0	2	0	2	0	0	2	2	2	2	0	0
Tdurum_contig50364_1060	2	2	2	2	2	2	2	2	2	0	0	2	0	0	2	0	2	2	0	0	0	0	0	0	2	0	0	2	0	0	2	2	2	0	0	0	0	0	2	0	2	0	0	2	2	2	2	0	0
Tdurum_contig50364_900	2	2	2	2	2	2	2	2	2	0	0	2	0	-1	-1	0	2	2	0	0	0	0	0	0	2	0	0	2	0	0	2	2	2	0	0	0	0	0	2	0	2	0	0	2	2	2	2	0	0
BS00087997_51	2	2	2	2	2	2	-1	2	2	0	0	2	0	-1	2	0	2	2	0	0	0	0	0	0	2	0	0	2	0	0	2	2	2	0	0	0	0	0	2	0	2	0	0	2	2	2	2	0	0
BS00110512_51	2	2	2	2	2	2	2	2	2	0	0	2	0	-1	2	0	2	2	0	0	0	0	0	0	2	0	0	2	0	0	2	2	2	0	0	0	0	0	2	0	2	0	0	2	2	2	2	0	0
GENE-3965_551	2	2	2	2	2	2	2	2	2	0	0	2	0	-1	-1	0	2	2	0	0	0	0	0	0	2	0	0	2	0	-1	2	2	2	0	0	0	0	0	2	0	2	0	0	2	2	2	2	0	0
IAAV5443	2	2	2	2	2	2	2	2	2	0	0	2	0	0	2	0	2	2	0	0	0	0	0	0	2	0	0	2	0	-1	2	2	2	0	0	0	0	0	2	0	2	0	0	2	2	2	2	0	0
RAC875_c41438_223	2	2	2	2	2	2	2	2	2	0	0	2	0	-1	-1	0	2	2	0	0	0	0	0	0	2	0	0	2	0	-1	2	2	2	0	0	0	0	0	2	0	2	0	0	2	2	2	2	0	0
BS00003818_51	2	2	2	2	2	2	2	2	2	0	0	2	0	-1	2	0	2	2	0	0	0	0	0	0	2	0	0	2	0	0	2	2	2	0	0	0	0	0	2	0	2	0	0	2	2	2	2	0	0
BS00091909_51	2	2	2	2	2	2	2	2	2	0	0	2	0	-1	2	0	2	2	0	0	0	0	0	0	2	0	0	2	0	0	2	2	2	0	0	0	0	0	2	0	2	0	0	2	2	2	2	0	0
GENE-4184_410	2	2	2	2	2	2	2	2	2	0	0	2	0	-1	-1	0	2	2	0	0	0	0	0	0	2	0	0	2	0	0	2	2	2	0	0	0	0	0	2	0	2	0	0	2	2	2	2	0	0
RAC875_c4568_60	2	2	2	2	2	2	2	2	2	0	0	2	0	-1	-1	0	2	2	0	0	0	0	0	0	2	0	0	2	0	0	2	2	2	0	0	0	0	0	2	0	2	0	0	2	2	2	2	0	0
RAC875_c56259_87	2	2	2	2	2	2	2	2	2	0	0	2	0	2	2	0	2	2	0	0	0	0	0	0	2	0	0	2	0	0	2	2	2	0	0	0	0	0	2	0	2	0	0	2	2	2	2	0	0
Tdurum_contig10275_384	2	2	2	2	2	2	2	2	2	0	0	2	0	0	-1	0	2	2	0	0	0	0	0	0	2	0	0	2	0	0	2	2	2	0	0	0	0	0	2	0	2	0	0	2	2	2	2	0	0
tplb0050d17_1401	2	2	2	2	2	2	2	2	2	0	0	2	0	-1	2	0	2	2	0	0	0	0	0	0	2	0	0	2	0	0	2	2	2	0	0	0	0	0	2	0	2	0	0	2	2	2	2	0	0
BS00065028_51	2	2	2	2	2	2	2	2	0	0	0	2	0	0	2	0	2	2	0	0	0	0	0	0	2	0	0	2	0	0	2	2	2	0	0	0	0	0	2	0	2	0	0	2	2	2	2	0	0
Kukri_c45876_61	2	2	2	2	2	2	2	2	0	0	0	2	0	0	2	0	2	2	0	0	0	0	0	0	2	0	0	2	0	0	2	2	2	0	0	0	0	0	2	0	2	0	0	2	2	2	2	0	0
Excalibur_c22876_1040	2	2	2	2	2	2	2	2	0	0	0	2	0	0	2	0	2	2	0	0	0	0	0	0	2	0	0	2	0	0	2	2	2	0	0	0	0	0	2	0	2	0	0	2	2	2	2	0	0
GENE-4008_395	2	2	2	2	2	2	2	2	0	0	0	2	0	0	2	0	2	2	0	0	0	0	0	0	2	0	0	2	0	0	2	2	2	0	0	0	0	0	2	0	2	0	0	2	2	2	2	0	0
GENE-4008_418	2	2	2	2	2	2	2	2	0	0	0	2	0	0	2	0	2	2	0	0	0	0	0	0	2	0	0	2	0	0	2	2	2	0	0	0	0	0	2	0	2	0	0	2	2	2	2	0	0
wsnp_Ex_c14156_22088738	2	2	2	2	2	2	2	2	0	0	0	2	0	0	2	0	2	2	0	0	0	0	0	0	2	0	0	2	0	0	2	2	2	0	0	0	0	0	2	0	2	0	0	2	2	2	2	0	0
Kukri_c494_1479	2	2	2	2	2	2	2	2	0	0	0	2	0	-1	-1	0	2	2	0	0	0	0	0	0	2	0	0	2	0	0	2	2	2	0	0	0	0	0	2	0	2	0	0	2	2	-1	2	0	0
Kukri_c494_1413	2	2	2	2	2	2	2	2	0	0	0	2	0	0	2	0	2	2	0	0	0	0	0	0	2	0	0	2	0	0	2	2	2	0	0	0	0	0	2	0	2	0	0	2	2	2	2	0	0
wsnp_Ex_c7546_12900094	2	2	2	2	2	2	2	2	-1	0	0	2	0	-1	-1	0	2	2	0	0	0	0	0	0	2	0	0	2	0	0	2	2	2	0	0	0	0	0	2	0	2	0	0	2	2	-1	2	0	0
BS00075667_51	2	2	2	2	2	2	2	2	-1	0	0	2	0	-1	-1	0	2	2	0	0	0	0	0	0	2	0	0	2	0	-1	2	2	2	0	0	0	0	0	2	0	2	0	0	2	2	2	2	0	0
RAC875_c14659_1066	2	2	2	2	2	2	2	2	0	0	0	2	0	2	2	0	2	2	0	0	0	0	0	0	2	0	0	2	0	0	2	2	2	0	0	0	0	0	2	0	2	0	0	2	2	2	2	0	0
Excalibur_rep_c68708_80	2	2	2	2	2	2	2	2	0	0	0	2	0	2	2	0	2	2	0	0	0	0	0	0	2	0	0	2	0	0	2	2	2	0	0	0	0	0	2	0	2	0	0	2	2	2	2	0	0
BS00058288_51	2	2	2	2	2	2	2	2	0	0	0	2	0	0	2	0	2	2	0	0	0	0	0	0	2	0	0	2	0	-1	2	2	2	0	0	0	0	0	2	0	2	0	0	2	2	2	2	0	0
BS00063485_51	2	2	2	2	2	2	2	2	0	0	0	2	0	-1	2	0	2	2	0	0	0	0	0	0	2	0	0	2	0	0	2	2	2	0	0	0	0	0	2	0	2	0	0	2	2	2	2	0	0
RFL_Contig1060_2185	2	2	2	2	2	2	2	2	0	0	0	2	0	-1	-1	0	2	2	0	0	0	0	0	0	2	0	0	2	0	0	2	2	2	0	0	0	0	0	2	0	2	0	0	2	2	2	2	0	0
BobWhite_c12261_130	2	2	2	2	2	2	2	2	0	0	0	2	0	-1	-1	0	2	2	0	0	0	0	0	0	2	0	0	2	0	0	2	2	2	0	0	0	0	0	2	0	2	0	0	2	2	2	2	0	0
Ku_c5353_293	2	2	2	2	2	2	2	2	0	0	0	2	0	-1	-1	0	2	2	0	0	0	0	0	0	2	0	0	2	0	-1	2	2	2	0	0	0	0	0	2	0	2	0	0	2	2	2	2	0	0
RAC875_c6429_55	2	2	2	2	2	2	2	2	0	0	0	2	0	-1	-1	0	2	2	0	0	0	0	0	0	2	0	0	2	0	0	2	2	2	0	0	0	0	0	2	0	2	0	0	2	2	2	2	0	0
Kukri_c32188_60	2	2	2	2	2	2	2	2	0	0	0	2	0	-1	2	0	2	2	0	0	0	0	0	0	2	0	0	2	0	-1	2	2	2	0	0	0	0	0	2	0	2	0	0	2	2	2	2	0	0
Ra_c6429_1217	2	2	2	2	2	2	2	2	0	0	0	-1	0	-1	2	0	2	-1	0	0	0	0	0	0	2	0	0	2	0	0	2	2	2	0	0	0	0	0	2	0	2	0	0	2	2	2	2	0	0
RAC875_c6429_132	2	2	2	2	2	2	2	2	0	0	0	2	0	-1	-1	0	2	2	0	0	0	0	0	0	2	0	0	2	0	0	2	2	2	0	0	0	0	0	2	0	2	0	0	2	2	2	2	0	0
wsnp_CAP7_c5487_2464864	2	2	2	2	2	2	2	2	0	0	0	2	0	-1	-1	0	2	2	0	0	0	0	0	0	2	0	0	2	0	0	2	2	2	0	0	0	0	0	2	0	2	0	0	2	2	2	2	0	0
Excalibur_s115877_56	2	2	2	2	2	2	2	2	0	0	0	2	0	2	-1	0	2	2	0	0	0	0	0	0	2	0	0	2	0	2	2	2	2	0	0	0	0	0	2	0	2	0	0	2	2	-1	2	0	0
wsnp_Ra_c39433_47141896	2	2	2	2	2	2	2	2	0	0	0	2	0	2	-1	0	2	2	0	0	0	0	0	0	2	0	0	2	0	2	2	2	2	0	0	0	0	0	2	0	2	0	0	2	2	-1	2	0	0
BS00074152_51	2	2	2	2	2	2	2	2	0	0	0	2	0	2	-1	0	2	2	0	0	0	0	0	0	2	0	0	2	0	2	2	2	2	0	0	0	0	0	2	0	2	0	0	2	2	-1	2	0	0
BS00083914_51	2	2	2	2	2	2	2	2	0	0	0	2	0	2	-1	0	2	2	0	0	0	0	0	0	2	0	0	2	0	2	2	2	2	0	0	0	0	0	2	0	2	0	0	2	2	-1	2	0	0
wsnp_Ex_c2325_4355706	2	2	2	2	2	2	2	2	0	0	0	2	0	2	2	0	2	2	0	0	0	0	0	0	2	0	0	2	0	2	2	2	2	0	0	0	0	0	2	0	2	0	0	2	2	2	2	0	0
RAC875_c21938_802	2	2	2	2	2	2	2	2	0	0	0	2	0	2	2	0	2	2	0	0	0	0	0	0	2	0	0	2	0	2	2	2	2	0	0	0	0	0	2	0	2	0	0	2	2	2	2	0	0
RFL_Contig5722_537	2	2	2	2	2	2	2	2	0	0	0	2	0	2	2	0	2	2	0	0	0	0	0	0	2	0	0	2	0	-1	2	2	2	0	0	0	0	0	2	0	2	0	0	2	2	2	2	0	0
Ex_c28973_935	2	2	2	2	2	2	2	2	2	0	0	2	0	2	2	0	2	2	0	0	0	0	0	0	2	0	0	2	0	2	2	2	2	0	0	0	0	0	2	0	2	0	0	2	2	2	2	0	0
Ex_c28973_947	2	2	2	2	2	2	2	2	2	0	0	2	0	2	2	0	2	2	0	0	0	0	0	0	2	0	0	2	0	2	2	2	2	0	0	0	0	0	2	0	2	0	0	2	2	2	2	0	0
Excalibur_c17487_51	2	2	2	2	2	2	2	2	2	0	0	2	0	2	-1	0	2	2	0	0	0	0	0	0	2	0	0	2	0	2	2	2	2	0	0	0	0	0	2	0	2	0	0	2	2	2	2	0	0
IAAV5620	2	2	2	2	2	2	2	2	2	0	0	-1	0	2	2	0	2	-1	0	0	0	0	0	0	2	0	0	2	0	2	2	2	2	0	0	0	0	0	2	0	2	0	0	2	2	2	2	0	0
BS00109913_51	2	2	2	2	2	2	2	2	2	0	0	2	0	2	-1	0	2	2	0	0	0	0	0	0	2	0	0	2	0	2	2	2	2	0	0	0	0	0	2	0	2	0	0	2	2	2	2	0	0
Kukri_rep_c70558_246	2	2	2	2	2	2	2	2	2	0	0	2	0	2	2	0	2	2	0	0	0	0	0	0	2	0	0	2	0	2	2	2	2	0	0	0	0	0	2	0	2	0	0	2	2	2	2	0	0
Tdurum_contig1706_272	2	2	2	2	2	2	2	2	2	0	0	2	0	2	2	0	2	2	0	0	0	0	0	0	2	0	0	2	0	2	2	2	2	0	0	0	0	0	2	0	2	0	0	2	2	2	2	0	0
wsnp_Ex_c28973_38050756	2	2	2	2	2	2	2	2	2	0	0	2	0	2	2	0	2	2	0	0	0	0	0	0	2	0	0	2	0	2	2	2	2	0	0	0	0	0	2	0	2	0	0	2	2	2	2	0	0
wsnp_Ex_c29648_38653281	2	2	2	2	2	2	2	2	2	0	0	2	0	2	-1	0	2	2	0	0	0	0	0	0	2	0	0	2	0	2	2	2	2	0	0	0	0	0	2	0	2	0	0	2	2	2	2	0	0
wsnp_Ex_c29648_38653339	2	2	2	2	2	2	2	2	2	0	0	2	0	2	-1	0	2	2	0	0	0	0	0	0	2	0	0	2	0	2	2	2	2	0	0	0	0	0	2	0	2	0	0	2	2	2	2	0	0
wsnp_Ex_c28973_38050405	2	2	2	2	2	2	2	2	2	0	0	2	0	2	2	0	2	2	0	0	0	0	0	0	2	0	0	2	0	2	2	2	2	0	0	0	0	0	2	0	2	0	0	2	2	2	2	0	0
Tdurum_contig82605_187	2	2	0	2	2	2	2	2	2	0	-1	2	0	2	-1	0	2	2	0	0	0	0	0	0	2	0	0	2	0	2	2	2	2	0	0	0	0	0	2	0	2	0	0	2	2	-1	2	0	0
Excalibur_rep_c87351_347	2	2	0	2	2	2	2	2	2	0	0	2	0	2	2	0	2	2	0	0	0	0	0	0	2	0	0	2	0	2	2	2	2	0	0	0	0	0	2	0	2	0	0	2	2	2	2	0	0
RAC875_c8254_594	2	2	0	2	2	2	2	2	2	0	0	2	0	2	-1	0	2	2	0	0	0	0	0	0	2	0	0	2	0	2	2	2	2	0	0	0	0	0	2	0	2	0	0	2	2	-1	2	0	0
BobWhite_c5324_168	2	2	0	2	2	2	2	2	2	0	0	2	0	2	2	0	2	2	0	0	0	0	0	0	2	0	0	2	0	2	2	2	2	0	0	0	0	0	2	0	2	0	0	2	2	2	2	0	0
BS00010129_51	2	-1	0	2	2	2	2	2	2	0	0	2	0	2	-1	0	2	2	0	0	0	0	0	0	2	0	0	2	0	2	2	2	2	0	0	0	0	0	2	0	2	0	0	2	2	-1	2	0	0
BS00011899_51	2	-1	0	2	2	2	2	2	2	0	0	2	0	-1	-1	0	2	2	0	0	0	0	0	0	2	0	0	2	0	2	2	2	2	0	0	0	0	0	2	0	2	0	0	2	2	-1	2	0	0
BS00078124_51	2	2	0	2	2	2	2	2	2	0	0	2	0	2	2	0	2	2	0	0	0	0	0	0	2	0	0	2	0	2	2	2	2	0	0	0	0	0	2	0	2	0	0	2	2	2	2	0	0
Excalibur_c6108_394	2	2	0	2	2	2	2	2	2	0	0	2	0	2	2	0	2	2	0	0	0	0	0	0	2	0	0	2	0	2	2	2	2	0	0	0	0	0	2	0	2	0	0	2	2	2	2	0	0
Excalibur_c98257_136	2	2	0	2	2	2	2	2	2	0	0	2	0	2	2	0	2	2	0	0	0	0	0	0	2	0	0	2	0	2	2	2	2	0	0	0	0	0	2	0	2	0	0	2	2	-1	2	0	0
Kukri_c373_982	2	2	0	2	2	2	2	2	2	0	0	2	0	2	2	0	2	2	0	0	0	0	0	0	2	0	0	2	0	2	2	2	2	0	0	0	0	0	2	0	2	0	0	2	2	2	2	0	0
Ra_c7741_1403	2	2	0	2	2	2	2	2	2	0	0	2	0	2	2	0	2	2	0	0	0	0	0	0	2	0	0	2	0	2	2	2	2	0	0	0	0	0	2	0	2	0	0	2	2	2	2	0	0
RFL_Contig2800_257	2	2	0	2	2	2	2	2	2	0	0	2	0	2	2	0	2	2	0	0	0	0	0	0	2	0	0	2	0	2	2	2	2	0	0	0	0	0	2	0	2	0	0	2	2	2	2	0	0
RFL_Contig2800_905	2	2	0	2	2	2	2	2	2	0	0	2	0	2	2	0	2	2	0	0	0	0	0	0	2	0	0	2	0	2	2	2	2	0	0	0	0	0	2	0	2	0	0	2	2	2	2	0	0
TA001656-0405	2	2	0	2	2	2	2	2	2	0	0	2	0	2	2	0	2	2	0	0	0	0	0	0	2	0	0	2	0	2	2	2	2	0	0	0	0	0	2	0	2	0	0	2	2	-1	2	0	0
Tdurum_contig10229_127	2	2	0	2	2	2	2	2	2	0	-1	2	0	2	2	0	2	-1	0	0	0	0	0	0	2	0	0	2	0	2	2	2	2	0	0	0	0	0	2	0	2	-1	-1	2	2	2	2	0	0
Tdurum_contig93104_520	2	2	0	2	2	2	-1	2	2	0	0	2	0	2	2	0	2	2	0	0	0	0	0	0	2	0	0	2	0	2	2	2	2	0	0	0	0	0	2	0	2	0	0	2	2	2	2	0	0
wsnp_Ex_c10824_17611901	2	2	0	2	2	2	2	2	2	0	0	2	0	2	2	0	2	2	0	0	0	0	0	0	2	0	0	2	0	2	2	2	2	0	0	0	0	0	2	0	2	0	0	2	2	2	2	0	0
BobWhite_c19298_232	2	2	0	2	2	2	2	2	0	0	0	2	0	2	2	0	2	2	0	0	0	0	0	0	2	0	0	2	0	2	2	2	2	0	0	0	0	0	2	0	2	0	0	2	2	-1	2	0	0
Ku_c16162_2453	2	-1	0	2	2	2	2	2	-1	0	0	2	0	-1	-1	0	2	2	0	0	0	0	0	0	2	0	0	2	0	0	2	2	2	0	0	0	0	0	2	0	2	0	0	2	2	-1	2	0	0
RAC875_c11887_518	0	0	0	0	0	0	0	2	0	2	0	2	0	2	0	0	0	2	-1	2	2	2	0	0	0	0	0	0	2	2	0	0	2	0	0	0	0	0	2	2	0	2	2	-1	0	0	0	0	0
RAC875_c23140_869	0	0	0	0	0	0	0	2	0	2	0	2	0	2	0	0	0	2	-1	2	2	2	0	0	0	0	0	0	2	2	0	0	2	0	0	0	0	0	2	2	0	2	2	2	0	0	0	0	0
RAC875_c23140_666	0	0	0	0	0	0	0	2	-1	2	0	2	0	-1	0	0	0	2	-1	2	2	2	0	0	0	0	0	0	2	2	0	0	2	0	0	0	0	0	2	2	0	2	2	2	0	0	0	0	0
RAC875_c1126_1569	0	0	0	0	0	0	0	2	-1	2	0	2	0	2	0	0	0	2	2	2	2	2	0	0	0	0	0	0	2	2	0	0	2	0	0	0	0	0	2	2	0	2	2	-1	0	0	0	0	0
Excalibur_c4362_165	0	0	0	0	0	0	0	2	0	2	0	2	0	2	0	0	0	2	2	2	2	2	0	0	0	0	0	0	2	2	0	0	2	0	0	0	0	0	2	2	0	2	2	2	0	0	0	0	0
RAC875_c25517_1067	0	0	0	0	0	0	0	2	-1	2	0	2	0	-1	0	0	0	2	-1	2	2	2	0	0	0	0	0	0	2	2	0	0	2	0	0	0	0	0	2	2	0	2	2	2	0	0	0	0	0
IAAV649	0	0	0	0	0	0	0	2	0	2	0	2	0	-1	0	0	0	2	-1	2	2	2	0	0	0	0	0	0	2	2	0	0	2	0	0	0	0	0	2	2	0	2	2	-1	0	0	0	0	0
Excalibur_c24593_1217	0	0	0	0	0	0	0	2	0	2	0	2	0	-1	0	0	0	2	-1	2	2	2	0	0	0	0	0	0	2	2	0	0	2	0	0	0	0	0	2	2	0	2	2	-1	0	0	0	0	0
BobWhite_c17904_259	0	0	0	0	0	0	0	2	0	2	0	2	0	-1	0	0	0	2	-1	2	2	2	0	0	0	0	0	0	2	2	0	0	2	0	0	0	0	0	2	2	0	2	2	-1	0	0	0	0	0
RAC875_c1126_1769	0	0	0	0	0	0	0	2	-1	2	0	2	0	2	0	0	0	2	2	2	2	2	0	0	0	0	0	0	2	2	0	0	2	0	0	0	0	0	2	2	0	2	2	2	0	0	0	0	0
Excalibur_c22708_625	0	0	0	0	0	0	0	2	-1	2	0	2	0	2	0	0	0	2	2	2	2	2	0	0	0	0	0	0	2	2	0	0	2	0	0	0	0	0	2	2	0	2	2	2	0	0	0	0	0
Excalibur_c44794_122	0	0	0	0	0	0	0	2	0	2	0	2	0	2	0	0	0	2	0	2	2	2	0	0	0	0	0	0	2	2	0	0	2	0	0	0	0	0	2	2	0	2	2	0	0	0	0	0	0
tplb0022c16_494	0	0	0	0	0	0	2	2	0	2	0	2	0	2	0	0	0	2	-1	2	2	2	2	0	0	0	0	0	2	2	0	0	2	2	0	0	2	0	2	2	0	2	-1	-1	0	0	2	0	0
RAC875_c55351_223	0	0	0	0	0	0	2	2	0	2	0	2	0	2	0	0	0	2	2	2	2	2	2	0	2	0	0	0	2	2	2	0	2	2	0	0	2	0	2	2	0	2	2	2	0	0	2	0	0
RAC875_c6736_336	0	0	0	0	0	0	2	2	2	2	0	2	0	2	0	0	0	2	2	2	2	2	2	0	2	0	0	0	2	2	2	0	2	2	0	0	2	0	2	2	0	2	2	2	0	0	2	0	0
wsnp_Ku_c38569_47177068	0	0	0	0	0	0	2	2	-1	2	0	2	0	2	0	0	0	2	-1	2	2	2	2	0	2	0	0	0	2	2	2	0	2	2	0	0	2	0	2	2	0	2	0	2	0	0	2	0	0
wsnp_Ex_c14219_22169892	0	0	0	0	0	0	2	2	0	2	0	2	0	2	0	0	0	2	-1	2	2	2	2	0	2	0	0	0	2	2	2	0	2	2	0	0	2	0	2	2	0	2	-1	-1	0	0	2	0	0
RAC875_c23310_217	0	0	0	0	0	0	2	2	0	2	0	2	0	2	0	0	0	2	2	2	2	2	2	0	2	0	0	0	2	2	2	0	2	2	0	0	2	0	2	2	0	2	-1	2	0	0	2	0	0
Kukri_c74599_85	0	0	0	0	0	0	2	2	0	2	0	2	0	2	0	0	0	2	-1	2	2	2	2	0	2	0	0	0	2	2	2	0	2	2	0	0	2	0	2	2	0	2	-1	-1	0	0	2	0	0
Excalibur_c78792_203	0	0	0	0	0	0	2	2	0	2	0	2	0	2	0	0	0	2	2	2	2	2	2	0	2	0	0	0	2	2	2	0	2	2	0	0	2	0	2	2	0	2	-1	2	0	0	2	0	0
BS00068864_51	0	0	0	0	0	0	2	2	-1	2	0	2	0	2	0	0	0	2	-1	2	2	2	2	0	2	0	0	0	2	2	2	0	2	2	0	0	2	0	2	2	0	2	-1	-1	0	0	2	0	0
BS00068863_51	0	0	0	0	0	0	2	2	-1	2	0	2	0	2	0	0	0	2	-1	2	2	2	2	0	2	0	0	0	2	2	2	0	2	2	0	0	2	0	2	2	0	2	-1	-1	0	0	2	0	0
BS00028795_51	0	0	0	0	0	0	2	2	0	2	0	2	0	2	0	0	0	2	0	2	2	2	2	0	2	0	0	0	2	2	2	0	2	2	0	0	2	0	2	2	0	2	0	2	0	0	2	0	0
BS00028794_51	0	0	0	0	0	0	2	2	0	2	0	2	0	2	0	0	0	2	-1	2	2	2	2	0	2	0	0	0	2	2	2	0	2	2	0	0	2	0	2	2	0	2	0	-1	0	0	2	0	0
Tdurum_contig46954_406	0	0	0	0	0	0	2	2	0	2	-1	2	0	2	0	0	0	2	0	2	2	2	2	0	2	0	0	0	2	2	2	0	2	2	0	0	2	0	2	2	0	2	-1	2	0	0	2	0	0
RAC875_c21165_1058	0	0	0	0	0	0	2	2	0	2	0	2	0	2	0	0	0	2	2	2	2	2	2	0	2	0	0	0	2	2	2	0	2	2	0	0	2	0	2	2	0	2	0	2	0	0	2	0	0
Kukri_c36885_58	0	0	0	0	0	0	2	2	0	2	0	2	0	2	0	0	0	2	-1	2	2	2	2	0	2	0	0	0	2	2	2	0	2	2	0	0	2	0	2	2	0	2	0	2	0	0	2	0	0
Kukri_c31299_490	0	0	0	0	0	0	2	2	0	2	0	2	0	2	0	0	0	2	0	2	2	2	2	0	2	0	0	0	2	2	2	0	2	2	0	0	2	0	2	2	0	2	0	2	0	0	2	0	0
Excalibur_c9166_913	0	0	0	0	0	0	2	2	0	2	0	2	0	2	0	0	0	2	-1	2	2	2	2	0	2	0	0	0	2	2	2	0	2	2	0	0	2	0	2	2	0	2	0	-1	0	0	2	0	0
Excalibur_c1254_257	0	0	0	2	0	0	2	2	0	2	0	2	0	2	0	0	0	2	-1	2	2	2	2	0	2	0	0	0	2	2	2	2	2	2	0	0	2	0	2	2	0	2	0	-1	0	0	2	0	0
RAC875_rep_c114991_394	0	0	0	2	0	0	2	2	0	2	0	2	0	-1	0	0	0	2	-1	2	2	2	2	0	2	0	0	0	2	2	2	2	2	2	0	0	2	0	2	2	0	2	0	-1	0	0	2	0	0
RAC875_c4336_208	0	0	0	2	0	0	2	2	-1	2	0	2	0	2	0	0	0	2	-1	2	2	2	2	0	2	0	0	0	2	2	2	2	2	2	0	0	2	0	2	2	0	2	0	-1	0	0	2	0	0
Kukri_rep_c117224_154	0	0	0	2	0	0	2	2	0	2	0	2	0	-1	0	0	0	2	-1	2	2	2	2	0	2	0	0	0	2	2	2	2	2	2	0	0	2	0	2	2	0	2	0	-1	0	0	2	0	0
BS00010726_51	0	0	0	2	0	0	2	2	0	2	0	2	0	2	0	0	0	2	0	2	2	2	2	0	2	0	0	0	2	2	2	2	2	2	0	0	2	0	2	2	0	2	0	2	0	0	2	0	0
Tdurum_contig11613_329	0	0	0	2	0	0	2	2	0	2	0	2	0	-1	0	0	0	2	-1	2	2	2	2	0	2	0	0	0	2	2	2	2	2	2	0	0	2	0	2	2	0	2	0	-1	0	0	2	0	0
CAP7_c1706_56	0	0	0	2	0	0	2	2	0	2	0	2	0	-1	0	0	0	2	-1	2	2	2	2	0	2	0	0	0	2	2	2	2	2	2	0	0	2	0	2	2	0	2	0	-1	0	0	2	0	0
CAP11_c3214_133	0	0	0	2	0	0	2	2	0	2	0	2	0	-1	0	0	0	2	0	2	2	2	2	0	2	0	0	0	2	2	2	2	2	2	0	0	2	0	2	2	0	2	0	-1	0	0	2	0	0
RAC875_c18845_104	0	0	0	2	0	0	2	2	-1	2	0	2	0	-1	0	0	0	2	-1	2	2	2	2	0	2	0	0	0	2	2	2	2	2	2	0	0	2	0	2	2	0	2	0	2	0	0	2	0	0
[truncated: 5,965 more rows]
[truncated: 78 more columns]

## Sheet: Linkage Group
Marker Name	Linkage Group	Kosambi (cM)
Kukri_c13513_759	1	0
RAC875_c50463_808	1	8.167
Jagger_rep_c10343_173	1	8.167
Ex_c28368_426	1	8.167
BS00103478_51	1	8.167
BS00081680_51	1	8.167
wsnp_JD_c7522_8606553	1	8.167
wsnp_Ex_c7965_13520238	1	8.167
Tdurum_contig42479_3800	1	8.167
Kukri_c2121_2345	1	8.167
Kukri_c2121_1334	1	8.167
Excalibur_c25175_512	1	8.167
Ex_c4876_1221	1	8.167
wsnp_Ex_c19717_28713417	1	8.58
Excalibur_c22240_938	1	8.99
RAC875_c23587_271	1	8.99
BS00081682_51	1	8.99
BS00079071_51	1	8.99
wsnp_Ex_c7252_12453079	1	8.99
wsnp_Ex_c1137_2182795	1	8.99
BS00022288_51	1	11.695
RAC875_c97040_104	1	11.695
Kukri_c7393_851	1	12.115
RAC875_c5831_1486	1	12.115
Excalibur_c97691_225	1	12.956
IAAV8085	1	13.372
Excalibur_c5139_198	1	14.612
wsnp_Ex_c1358_2601510	1	15.012
RAC875_c75971_349	1	15.012
Excalibur_c1358_794	1	15.012
BS00010039_51	1	15.012
wsnp_Ex_c57982_59470152	1	15.012
Tdurum_contig46413_779	1	15.012
RAC875_c18640_821	1	15.012
Excalibur_c82557_201	1	15.012
Excalibur_c71158_54	1	15.012
CAP8_c2448_355	1	15.012
BS00076278_51	1	15.012
BS00069278_51	1	15.012
wsnp_Ku_c183_358844	1	15.012
tplb0053o08_2004	1	15.012
Kukri_c32052_171	1	15.012
Kukri_c29655_239	1	15.012
Kukri_c24962_123	1	15.012
IAAV8297	1	15.012
GENE-4120_155	1	15.012
BS00010128_51	1	15.012
BS00108351_51	1	15.409
Kukri_rep_c102231_265	1	20.292
Tdurum_contig43475_155	1	20.292
wsnp_Ex_c10657_17376448	1	20.292
BS00026456_51	1	20.292
tplb0062i18_102	1	20.292
BS00014831_51	1	20.292
BS00082567_51	1	20.292
Kukri_c22349_754	1	20.292
CAP12_c3074_192	1	20.292
RAC875_c9457_507	1	20.716
BS00108242_51	1	20.716
Kukri_c7192_1077	1	21.139
Tdurum_contig42405_197	1	21.546
Excalibur_c35316_154	1	21.546
BS00000713_51	1	22.386
RAC875_rep_c110533_92	1	22.386
Kukri_c1818_2671	1	22.386
GENE-0014_317	1	22.386
wsnp_Ra_c11211_18227610	1	22.386
wsnp_Ex_c10657_17376086	1	22.386
tplb0025b13_372	1	22.386
tplb0025b13_2879	1	22.386
tplb0025b13_2372	1	22.386
tplb0025b13_2054	1	22.386
tplb0025b13_1721	1	22.386
Kukri_rep_c68121_997	1	22.386
Kukri_rep_c108573_60	1	22.386
Kukri_c7192_1128	1	22.386
Kukri_c2408_857	1	22.386
Kukri_c1818_2380	1	22.386
IACX2941	1	22.386
IAAV5306	1	22.386
GENE-3954_370	1	22.386
Excalibur_rep_c70751_58	1	22.386
Excalibur_c94139_55	1	22.386
Excalibur_c44612_474	1	22.386
Excalibur_c21898_153	1	22.386
Excalibur_c15165_367	1	22.386
CAP12_c8501_370	1	22.386
BS00093327_51	1	22.386
BS00068351_51	1	22.386
BobWhite_c21669_430	1	22.386
tplb0028p02_562	1	22.386
BS00090003_51	1	22.386
BS00082566_51	1	22.386
RFL_Contig2831_1012	1	22.386
Tdurum_contig44888_837	1	22.386
IAAV3919	1	22.386
BS00100774_51	1	22.386
BS00033750_51	1	22.386
BS00033749_51	1	22.386
BS00023130_51	1	22.386
BS00022677_51	1	22.386
RAC875_c42700_264	1	22.386
Ku_c28007_1398	1	22.386
GENE-1118_58	1	22.386
BobWhite_c1361_1187	1	22.386
RAC875_c22821_542	1	27.449
Kukri_c5715_141	1	27.449
BS00110709_51	1	27.449
BS00022270_51	1	27.449
RFL_Contig1703_695	1	28.71
Excalibur_rep_c92985_618	1	40.42
RAC875_c13012_1598	1	40.42
wsnp_Ex_c10783_17554146	1	43.364
BS00078982_51	1	44.164
wsnp_Ku_c42878_50516167	1	44.164
wsnp_Ex_c5323_9408829	1	44.164
wsnp_Ex_c48087_53105842	1	44.164
wsnp_Ex_c10783_17555091	1	44.164
RAC875_c8245_272	1	44.164
Kukri_c7436_2259	1	44.164
Kukri_c16098_95	1	44.164
CAP7_c4833_141	1	44.164
BS00105601_51	1	44.164
wsnp_Ku_rep_c101175_88380491	1	44.164
wsnp_Ex_c5323_9409407	1	44.164
RAC875_c1825_188	1	44.164
wsnp_Ku_c11896_19337444	1	45.791
Kukri_c13136_1363	1	45.791
GENE-0509_639	1	45.791
Excalibur_c7026_2635	1	45.791
BobWhite_c48591_394	1	45.791
wsnp_Ra_c26191_35761997	1	47.031
Tdurum_contig13937_2280	1	47.031
IAAV5252	1	47.031
RFL_Contig2160_524	1	47.851
Tdurum_contig8382_300	1	47.851
Kukri_c31964_56	1	47.851
Kukri_c31964_109	1	47.851
BS00084022_51	1	49.918
wsnp_Ex_c1309_2503093	1	49.918
BobWhite_c149_1839	1	49.918
Excalibur_c1014_371	1	49.918
wsnp_BE586140A_Ta_2_1	1	49.918
BobWhite_c4499_153	1	49.918
RAC875_c9700_989	1	50.731
Excalibur_rep_c100567_692	1	50.731
wsnp_Ex_c11047_17915225	1	50.731
wsnp_Ex_c11047_17915103	1	50.731
Kukri_c46010_872	1	53.297
RAC875_c14066_452	1	54.117
RAC875_rep_c111911_116	1	54.52
RAC875_c10090_963	1	54.52
Excalibur_c7237_1208	1	54.52
Excalibur_c7237_1084	1	54.52
Tdurum_contig13946_329	1	55.76
Tdurum_contig13946_241	1	55.76
IACX1465	1	55.76
IACX1592	1	57.428
BS00029346_51	1	57.428
wsnp_CAP12_c2438_1180601	1	58.275
IAAV5652	1	58.275
RAC875_c826_2186	1	58.275
BS00012210_51	1	58.275
wsnp_Ex_c2181_4089788	1	63.338
wsnp_Ex_c3253_5994376	1	63.735
Ra_c30689_939	1	63.735
wsnp_CAP11_c23_61357	1	63.735
wsnp_Ex_c24686_33942264	1	63.735
wsnp_Ex_c24686_33941368	1	63.735
wsnp_Ex_c2181_4089639	1	63.735
RAC875_c37183_331	1	63.735
IAAV4243	1	63.735
BS00087437_51	1	63.735
RAC875_c19509_174	1	64.135
GENE-0431_573	1	64.135
GENE-0431_601	1	64.135
Kukri_rep_c69903_1525	1	65.816
Kukri_c8422_642	1	65.816
Kukri_c8332_120	1	65.816
Excalibur_c16292_1338	1	65.816
Excalibur_rep_c84731_611	1	65.816
GENE-0491_632	1	65.816
IAAV9050	1	67.936
BS00021719_51	1	67.936
wsnp_Ra_c32175_41221223	1	67.936
wsnp_Ex_c4310_7770452	1	67.936
Excalibur_c59894_97	1	67.936
BobWhite_c37935_124	1	67.936
IACX18883	1	67.936
Excalibur_c13489_867	1	67.936
tplb0059e14_515	1	68.346
Kukri_c35200_895	1	68.346
Kukri_c20672_360	1	68.346
RAC875_c86680_391	1	68.756
Kukri_c88698_296	1	68.756
BobWhite_c38865_319	1	68.756
RAC875_c21625_246	1	69.966
Excalibur_c13183_128	1	69.966
Ra_c58315_265	1	69.966
IACX3496	1	69.966
BS00033469_51	1	69.966
wsnp_Ex_c56097_58352130	1	69.966
RAC875_c41275_131	1	69.966
RAC875_c23158_301	1	69.966
Kukri_c10453_875	1	69.966
Excalibur_c56097_168	1	70.369
wsnp_Ra_c12148_19539667	1	71.182
wsnp_Ku_c24239_34199356	1	71.182
wsnp_Ku_c21356_31093507	1	71.182
wsnp_Ex_c5192_9203682	1	71.182
wsnp_Ex_c5192_9203100	1	71.182
wsnp_Ex_c12336_19686808	1	71.182
wsnp_BE495786A_Ta_2_1	1	71.182
RFL_Contig3203_1971	1	71.182
RAC875_c53185_802	1	71.182
IACX662	1	71.182
IACX4378	1	71.182
Excalibur_rep_c112145_271	1	71.182
Excalibur_c30591_637	1	71.182
Ex_c5192_943	1	71.182
BS00087600_51	1	71.182
BS00067421_51	1	71.182
BS00022698_51	1	71.182
RAC875_c31276_1128	1	71.182
GENE-0004_635	1	71.182
CAP11_c1972_285	1	71.182
BS00021889_51	1	71.182
wsnp_Ex_c534_1058778	1	71.989
wsnp_Ex_c27940_37101775	1	71.989
Kukri_c3582_87	1	71.989
Kukri_c27785_400	1	71.989
BS00033262_51	1	71.989
BS00023101_51	1	71.989
wsnp_Ex_c5216_9235964	1	71.989
IAAV3049	1	71.989
GENE-0112_64	1	71.989
Excalibur_c7033_159	1	71.989
wsnp_Ex_c21336_30465618	1	73.684
RAC875_c23081_141	1	73.684
wsnp_Ex_c21193_30320134	1	73.684
Excalibur_c34697_831	1	73.684
BobWhite_c12568_900	1	73.684
BS00065843_51	1	74.518
BS00092585_51	1	74.518
wsnp_Ra_c4664_8410628	1	74.518
wsnp_Ku_c16913_25885872	1	74.518
wsnp_Ex_rep_c105443_89868548	1	74.518
wsnp_Ex_c35821_43892960	1	74.518
wsnp_Ex_c19294_28225846	1	74.518
RAC875_c19579_377	1	74.518
Ra_c9876_373	1	74.518
IACX11338	1	74.518
IAAV8429	1	74.518
Ex_c4051_1826	1	74.518
Ex_c16529_304	1	74.518
BS00032112_51	1	74.518
BS00021714_51	1	74.518
Kukri_c16913_422	1	74.518
GENE-0410_71	1	74.518
Excalibur_c35821_61	1	74.518
Ex_c105443_895	1	74.518
BobWhite_c38987_641	1	76.656
Kukri_rep_c111676_103	1	76.656
wsnp_Ra_c3270_6136601	1	76.656
wsnp_Ra_c3270_6136110	1	76.656
wsnp_BE445113A_Ta_2_2	1	76.656
Kukri_rep_c117029_125	1	76.656
IACX5960	1	76.656
IAAV8804	1	76.656
TA003955-1138	1	76.656
BobWhite_c29908_113	1	76.656
RAC875_c29540_1109	1	77.875
Kukri_c18413_168	1	77.875
Excalibur_c65437_104	1	78.272
Excalibur_c3475_903	1	78.272
wsnp_Ra_c11877_19161832	1	78.272
wsnp_BG314157A_Ta_2_1	1	78.272
RFL_Contig22_617	1	78.272
RAC875_c60514_90	1	78.272
RAC875_c49074_374	1	78.272
RAC875_c27417_150	1	78.272
Kukri_c53153_92	1	78.272
Kukri_c43410_348	1	78.272
BS00065324_51	1	78.272
BS00021728_51	1	78.272
Kukri_c58155_786	1	78.272
GENE-0511_403	1	78.272
BS00067742_51	1	78.272
wsnp_Ex_c6452_11213329	1	78.669
wsnp_Ex_c20489_29564938	1	78.669
Kukri_c31891_1355	1	78.669
Excalibur_c3475_113	1	78.669
BS00030036_51	1	78.669
TA003063-0097	1	78.669
RAC875_c46551_339	1	78.669
Excalibur_c3429_652	1	78.669
Tdurum_contig64955_285	1	79.496
Tdurum_contig29616_817	1	79.496
Tdurum_contig29616_55	1	79.496
Ku_c103409_52	1	79.496
Ex_c30016_192	1	79.496
BobWhite_c7337_717	1	79.496
BobWhite_c46007_582	1	79.496
Excalibur_c50394_199	1	80.322
RAC875_c32979_440	1	80.729
wsnp_Ex_c22284_31478675	1	81.535
BS00012525_51	1	82.369
wsnp_Ku_c23012_32893918	1	82.369
RAC875_c80876_67	1	82.369
Kukri_c12984_465	1	82.369
IAAV6234	1	82.369
Excalibur_c44668_382	1	82.369
wsnp_Ex_c1997_3757508	1	82.782
wsnp_Ex_c1997_3757415	1	82.782
wsnp_JD_c6544_7697578	1	82.782
wsnp_JD_c6544_7697412	1	82.782
wsnp_JD_c6544_7697235	1	82.782
wsnp_Ex_c1997_3757721	1	82.782
wsnp_Ex_c1997_3757496	1	82.782
wsnp_Ex_c1997_3756118	1	82.782
wsnp_Ex_c1997_3755945	1	82.782
Kukri_rep_c109473_80	1	82.782
Ku_c809_2419	1	82.782
Jagger_c5280_407	1	82.782
IAAV2694	1	88.887
BobWhite_c104_89	1	88.887
Excalibur_c49946_169	1	89.72
Excalibur_c29605_535	1	89.72
BobWhite_c26212_208	1	89.72
wsnp_BE517729A_Ta_2_1	1	90.137
tplb0031d22_1107	1	91.398
BS00009808_51	1	92.217
Excalibur_rep_c69456_172	1	92.627
wsnp_Ra_c15564_23999084	1	93.877
Excalibur_c7370_179	1	93.877
wsnp_BG263358A_Ta_2_3	1	95.138
CAP8_c2578_452	1	95.138
wsnp_BG263358A_Ta_2_1	1	95.138
Kukri_c10405_1277	1	96.778
RAC875_rep_c95460_302	1	97.185
BS00087588_51	1	97.598
IAAV8743	1	98.431
Kukri_c38868_427	1	118.956
BobWhite_c27541_67	1	119.782
IAAV2729	1	131.082
Tdurum_contig56662_54	2	0
Kukri_c44895_139	2	0
Kukri_c44895_88	2	0.82
wsnp_CAP11_rep_c7847_3468669	2	1.24
wsnp_Ku_rep_c109724_94227136	2	1.24
wsnp_Ku_c816_1684613	2	1.24
wsnp_JD_rep_c49006_33254974	2	1.24
wsnp_Ex_c7684_13109335	2	1.24
wsnp_Ex_c3264_6017750	2	1.24
wsnp_Ex_c28149_37293173	2	1.24
wsnp_Ex_c28149_37293117	2	1.24
wsnp_Ex_c23143_32376622	2	1.24
wsnp_Ex_c13955_21833712	2	1.24
Tdurum_contig62584_770	2	1.24
Tdurum_contig51167_915	2	1.24
Tdurum_contig51167_810	2	1.24
Tdurum_contig51167_534	2	1.24
Tdurum_contig51167_390	2	1.24
Tdurum_contig18174_283	2	1.24
RFL_Contig399_1148	2	1.24
RAC875_rep_c71093_1070	2	1.24
RAC875_c49433_308	2	1.24
Ra_c8027_1021	2	1.24
Kukri_c51781_199	2	1.24
Kukri_c35030_266	2	1.24
Kukri_c2338_533	2	1.24
Kukri_c16271_544	2	1.24
Ku_c3523_1959	2	1.24
IAAV5567	2	1.24
CAP12_c8163_118	2	1.24
CAP12_c6629_301	2	1.24
BS00067119_51	2	1.24
BobWhite_c6820_199	2	1.24
BobWhite_c39092_629	2	1.24
BobWhite_c37358_208	2	1.24
wsnp_Ex_c10903_17717179	2	1.24
TA001430-0733	2	1.24
RAC875_c48804_590	2	1.24
RAC875_c36980_161	2	1.24
Kukri_c82086_387	2	1.24
Excalibur_c21534_1436	2	1.24
BobWhite_c19182_280	2	1.24
Tdurum_contig8224_378	2	1.657
CAP12_c3758_112	2	1.657
wsnp_Ex_c30552_39457767	2	2.063
BobWhite_c5242_400	2	2.063
wsnp_BF474340A_Ta_2_1	2	2.063
TA002362-0785	2	2.063
Excalibur_rep_c96187_541	2	2.063
wsnp_Ex_rep_c68171_66944702	2	2.87
RAC875_c3057_2297	2	3.676
Tdurum_contig51167_1029	2	3.676
Excalibur_c16947_81	2	3.676
RAC875_c23586_541	2	3.676
Ra_c364_50	2	3.676
wsnp_Ra_c19637_28840370	2	4.073
Tdurum_contig85466_170	2	4.073
Excalibur_c73970_243	2	4.073
RAC875_c16675_580	2	4.893
wsnp_Ex_c10631_17340809	2	5.3
GENE-3098_53	2	5.3
wsnp_Ra_c36089_44508724	2	6.1
wsnp_CAP11_c146_160903	2	6.1
Tdurum_contig81011_244	2	6.1
RFL_Contig3683_1784	2	6.1
Excalibur_c88792_93	2	6.1
Excalibur_c66_147	2	6.1
BobWhite_c44164_402	2	6.1
BobWhite_c44164_151	2	6.1
wsnp_Ex_c9918_16332583	2	7.393
wsnp_Ex_rep_c68058_66805898	2	7.393
wsnp_Ex_c9343_15514687	2	7.393
wsnp_Ex_c9343_15514531	2	7.393
wsnp_Ex_c25730_34991010	2	7.393
RAC875_c52947_338	2	9.133
Tdurum_contig84252_155	2	9.133
RAC875_c52947_84	2	9.133
Kukri_c65610_572	2	9.133
Ku_c20664_262	2	9.133
RAC875_rep_c71278_345	2	13.65
wsnp_Ex_c36911_44767554	2	14.066
wsnp_Ex_rep_c103474_88421290	2	14.066
IAAV6100	2	14.066
wsnp_Ex_c15377_23637176	2	14.476
Kukri_c17412_1249	2	14.889
RAC875_c62550_470	2	15.303
Tdurum_contig52086_129	2	18.298
Excalibur_c10736_1051	2	18.711
BS00062759_51	2	19.135
IAAV4435	2	25.357
wsnp_Ex_c3887_7051325	2	30.374
BobWhite_c66315_505	2	30.374
RAC875_rep_c71921_672	2	30.374
CAP11_c1115_150	2	30.787
wsnp_Ex_c750_1474300	2	30.787
wsnp_Ex_c46670_52108070	2	30.787
RFL_Contig858_2219	2	30.787
RAC875_c85550_73	2	30.787
RAC875_c85550_52	2	30.787
RAC875_c43389_105	2	30.787
RAC875_c29059_648	2	30.787
Kukri_c22011_1447	2	30.787
CAP7_c1295_62	2	30.787
CAP11_c5573_163	2	30.787
BS00021780_51	2	30.787
wsnp_Ex_c52086_55808126	2	30.787
RFL_Contig2961_1806	2	30.787
RAC875_c20823_707	2	30.787
wsnp_Ex_c5412_9565527	3	0
wsnp_Ex_c5412_9564478	3	0
Ra_c58279_702	3	0
Ra_c58279_684	3	0
wsnp_Ex_c5412_9564550	3	0
wsnp_Ex_c5412_9564346	3	0
wsnp_Ex_c5412_9564046	3	0
Ra_c10616_265	3	2.544
IAAV7468	3	2.544
Tdurum_contig62138_414	3	3.774
Tdurum_contig62138_385	3	3.774
wsnp_Ex_c59373_60260876	3	4.177
Excalibur_c51876_189	3	4.977
wsnp_Ku_c10302_17079851	3	5.377
Excalibur_c25235_1178	3	5.377
Excalibur_rep_c105284_131	3	5.377
Excalibur_rep_c105284_110	3	5.377
BS00066186_51	3	5.377
Excalibur_c61806_213	3	5.377
wsnp_JD_rep_c48914_33168544	3	6.597
wsnp_Ex_rep_c102538_87682273	3	16.834
tplb0041i03_438	3	16.834
RAC875_c15213_1942	3	16.834
wsnp_Ex_c28204_37349164	3	17.654
Kukri_c77188_798	3	18.473
BS00022903_51	3	19.703
Ra_c34214_1320	3	20.933
GENE-0685_571	3	20.933
BS00041816_51	3	20.933
CAP12_rep_c7918_56	3	23.878
IAAV2718	3	28.849
BS00093447_51	3	30.11
Kukri_rep_c72243_148	3	32.633
wsnp_Ex_rep_c66465_64708722	3	33.039
Ra_c5443_527	3	33.039
Kukri_rep_c75317_375	3	33.039
Kukri_rep_c107630_127	3	33.039
BS00065259_51	3	33.039
Excalibur_c27279_699	3	33.452
Kukri_c44255_832	3	37.889
BS00083497_51	3	37.889
GENE-3975_114	3	37.889
BS00098423_51	3	37.889
RAC875_c13861_1248	3	38.292
BobWhite_c20952_105	3	38.292
Excalibur_c40617_983	3	38.292
Tdurum_contig30325_334	3	38.292
wsnp_JD_c15127_14676522	3	39.512
Excalibur_c65910_246	3	41.579
wsnp_JD_c169_270144	3	41.579
wsnp_BG605368A_Ta_2_4	3	41.579
RAC875_rep_c119619_54	3	41.579
RAC875_c81899_216	3	45.5
BobWhite_rep_c64440_83	3	45.5
Kukri_c4027_151	3	45.5
BS00080752_51	3	45.907
BS00094574_51	3	45.907
BS00108778_51	3	46.313
BS00080751_51	3	46.313
Kukri_c47259_416	3	46.313
Tdurum_contig33398_106	3	46.313
BS00093201_51	3	46.313
BS00081506_51	3	46.313
RAC875_c16333_340	3	50.304
RAC875_rep_c107961_348	3	60.854
GENE-1908_331	3	63.875
Kukri_c25901_348	3	66.896
Tdurum_contig4976_1138	3	73.951
Tdurum_contig93508_295	3	73.951
BS00011478_51	3	73.951
BS00022265_51	3	73.951
Kukri_c65380_351	3	77.497
Excalibur_c33040_447	3	77.497
RFL_Contig741_1380	3	77.497
Kukri_rep_c93878_374	3	77.497
Jagger_c4182_117	3	77.497
IAAV6905	3	77.497
Kukri_c43875_671	3	77.497
wsnp_Ex_c24964_34219020	3	78.737
wsnp_JD_c2578_3489735	3	78.737
RAC875_c19904_308	3	79.137
RAC875_c104160_61	3	79.137
Ku_c33884_267	3	81.204
RAC875_rep_c69619_145	3	82.011
wsnp_Ex_rep_c102390_87572532	3	82.417
wsnp_Ex_c41007_47932833	3	82.417
wsnp_CAP11_c1711_934478	3	82.417
Excalibur_c26462_452	3	82.417
wsnp_Ku_c33884_43306422	3	82.417
Kukri_c22047_313	3	82.417
BS00023048_51	3	82.417
GENE-0342_452	3	82.834
Excalibur_rep_c66618_87	3	83.251
CAP7_c1527_136	3	101.653
Kukri_c209_999	3	101.653
Excalibur_c7241_284	3	101.653
BobWhite_c47555_106	3	101.653
BS00022446_51	3	102.069
Excalibur_c29496_799	3	102.069
Excalibur_c37727_66	3	102.069
Kukri_c209_477	3	102.479
BS00053835_51	3	102.479
BS00053834_51	3	102.479
IACX987	3	102.479
IAAV2576	3	102.479
BobWhite_c5178_188	3	103.306
BobWhite_c15773_166	3	104.556
BS00066409_51	3	104.556
BobWhite_rep_c50285_616	3	104.953
Tdurum_contig67827_98	3	105.359
CAP7_c4056_108	3	105.359
BS00025880_51	3	105.359
BobWhite_c4517_120	3	105.359
BS00102709_51	3	107.479
BS00063368_51	3	107.479
Kukri_c27894_369	3	107.479
Tdurum_contig94203_610	3	108.306
Tdurum_contig61938_424	3	114.354
IAAV880	3	114.763
CAP12_c575_105	3	115.177
BS00096927_51	3	115.177
wsnp_Ra_c6586_11477949	3	115.177
BS00065245_51	3	118.251
Kukri_c24081_1386	3	119.567
RAC875_rep_c83950_222	3	119.998
IAAV8933	3	119.998
Excalibur_c20448_318	3	119.998
wsnp_Ku_c16547_25454123	3	120.414
Tdurum_contig52350_902	3	120.414
Tdurum_contig16904_167	3	120.414
Kukri_c25632_86	3	120.414
IAAV5232	3	120.414
BS00097473_51	3	120.414
Tdurum_contig42282_11463	3	120.414
Tdurum_contig42282_10323	3	120.414
RAC875_c22328_490	3	120.414
RAC875_c22328_1356	3	120.414
Kukri_c44231_1576	3	120.414
Excalibur_c7971_712	3	120.414
BS00010477_51	3	120.414
wsnp_Ex_c10555_17236072	3	120.828
Tdurum_contig12556_183	3	120.828
Excalibur_c91176_326	3	120.828
RAC875_c27530_860	3	121.234
Excalibur_rep_c106377_80	3	122.454
Excalibur_c49875_479	3	123.664
GENE-1294_120	3	124.067
RAC875_c51459_311	3	124.48
RAC875_c35688_178	3	124.48
Kukri_c706_702	3	124.48
Kukri_c26697_366	3	124.48
Excalibur_c16329_493	3	124.48
BS00027799_51	3	124.48
BS00024643_51	3	124.48
CAP8_c3129_381	3	124.894
Tdurum_contig92425_3144	3	125.303
Tdurum_contig92425_296	3	125.303
BS00065001_51	3	125.303
wsnp_Ku_c2838_5354231	3	125.303
wsnp_BE498892A_Ta_2_25	3	125.303
tplb0025l18_1788	3	125.303
Tdurum_contig8350_350	3	125.303
Tdurum_contig50720_482	3	125.303
RAC875_c35688_382	3	125.303
Kukri_c21008_657	3	125.303
IAAV4880	3	125.303
Excalibur_rep_c69149_1588	3	125.303
Excalibur_c62106_387	3	125.303
BS00087932_51	3	125.303
BS00087929_51	3	125.303
Tdurum_contig8350_243	3	125.303
Tdurum_contig14482_1073	3	125.303
RFL_Contig5122_974	3	125.303
RAC875_rep_c108389_937	3	125.303
RAC875_c35200_302	3	125.303
RAC875_c35200_230	3	125.303
IAAV7086	3	125.303
BS00064813_51	3	125.303
BS00049816_51	3	125.303
BobWhite_c7751_424	3	125.303
tplb0021g21_595	3	125.707
wsnp_BE499251A_Ta_2_1	3	126.967
Kukri_c53501_305	3	127.384
IAAV881	3	127.801
Tdurum_contig28437_135	3	127.801
BobWhite_c923_208	3	127.801
BS00031097_51	3	127.801
Kukri_c16094_289	3	128.641
Tdurum_contig64286_182	3	129.441
Kukri_c16094_799	3	129.441
BS00007689_51	3	129.441
BS00021937_51	3	129.441
Kukri_c7605_181	3	129.848
BS00010664_51	3	129.848
Tdurum_contig50839_593	3	129.848
RAC875_c46265_501	3	130.254
BS00067284_51	3	141.024
Ku_c7283_915	3	141.455
Ra_c19051_1446	3	141.455
Excalibur_c28885_363	3	141.455
wsnp_Ex_c63909_62932669	3	141.868
BS00101944_51	3	141.868
BS00024506_51	3	141.868
Excalibur_rep_c71146_319	3	141.868
wsnp_Ex_c63909_62932893	3	141.868
Kukri_c81100_105	3	141.868
Ex_c6937_1992	3	141.868
wsnp_Ex_c63909_62932437	3	141.868
Kukri_c12849_1392	3	141.868
Excalibur_c1999_1130	3	141.868
RAC875_c24364_526	3	142.278
wsnp_Ra_c15518_23944753	3	142.278
wsnp_JD_c30_50478	3	142.278
RAC875_c24364_307	3	142.278
GENE-4937_1435	3	142.278
Excalibur_c29231_932	4	0
wsnp_Ex_c342_670415	4	0
wsnp_Ex_c342_670243	4	0
tplb0032i02_1388	4	0
RAC875_c63018_348	4	0
wsnp_Ex_c322_624793	4	0
RAC875_c63018_441	4	0
BS00022393_51	4	0
RAC875_c8069_1709	4	0.414
wsnp_Ku_c23598_33524490	4	0.414
wsnp_Ex_c19516_28483751	4	0.414
wsnp_Ex_c19516_28481857	4	0.414
wsnp_Ex_c11560_18632698	4	0.414
RFL_Contig174_406	4	0.414
Excalibur_c15379_1305	4	0.414
Ex_c19516_3687	4	0.414
Ex_c19516_1184	4	0.414
BS00105593_51	4	0.414
BS00023052_51	4	0.414
BobWhite_c13373_250	4	0.414
wsnp_Ex_c19516_28483050	4	0.414
wsnp_Ex_c11560_18632777	4	0.414
Tdurum_contig56157_1595	4	0.414
TA012412-0412	4	0.414
Excalibur_rep_c66982_126	4	0.414
wsnp_Ex_c11950_19164191	4	0.823
wsnp_Ex_c11950_19164041	4	0.823
RFL_Contig4030_493	4	0.823
Kukri_c22152_730	4	0.823
CAP8_c2783_336	4	0.823
wsnp_Ku_c33374_42877546	4	1.233
Kukri_c33374_1048	4	1.233
BS00064392_51	4	1.233
Excalibur_rep_c66783_540	4	1.233
TA002095-0637	4	1.636
RAC875_c16881_1400	4	3.304
Kukri_c12804_620	4	3.704
Tdurum_contig48835_437	4	4.504
BobWhite_c10673_330	4	4.504
BobWhite_c10673_138	4	4.504
BobWhite_c48552_673	4	13.077
Ra_c18597_329	4	13.904
BS00063251_51	4	13.904
wsnp_Ku_c9883_16462146	4	13.904
Ex_c19038_1581	4	13.904
Tdurum_contig10785_1428	4	13.904
Tdurum_contig10785_816	4	13.904
Tdurum_contig10785_1409	4	13.904
Tdurum_contig10785_103	4	13.904
Kukri_c9883_407	4	13.904
BS00022322_51	4	13.904
Tdurum_contig10785_2433	4	14.304
Tdurum_contig74920_757	5	0
BobWhite_c11997_246	5	0
RAC875_c64107_404	5	0
Tdurum_contig59358_392	5	0
CAP8_rep_c3652_80	5	0.403
CAP8_rep_c6382_237	5	0.403
Excalibur_c6264_1054	5	0.403
Kukri_c62467_362	5	0.403
GENE-1674_631	5	0.403
Excalibur_c6264_249	5	0.403
Kukri_c10511_94	5	0.403
Kukri_c14029_117	5	0.403
IAAV4190	5	0.803
Kukri_c34845_242	5	0.803
Kukri_c3673_2442	5	0.803
Kukri_rep_c73936_154	5	0.803
RAC875_c45016_79	5	0.803
RAC875_c66845_466	5	0.803
GENE-1300_770	5	1.61
BobWhite_c9704_273	5	2.013
JG_c3077_225	5	2.013
Excalibur_c1905_1117	5	2.013
Excalibur_c9000_209	5	2.013
RAC875_c10286_1247	5	2.013
BobWhite_c17852_511	5	2.013
CAP7_c9672_181	5	2.013
wsnp_Ex_c21950_31124594	5	2.013
IAAV902	5	10.755
BobWhite_c18408_199	5	12.45
BobWhite_c43681_334	5	12.45
BS00010854_51	5	12.45
BS00011612_51	5	12.45
BS00037537_51	5	12.45
BS00076631_51	5	12.45
Ex_c104581_457	5	12.45
Ex_c9685_1264	5	12.45
Excalibur_rep_c67269_496	5	12.45
IAAV1334	5	12.45
IAAV8924	5	12.45
Ra_c20211_1415	5	12.45
RFL_Contig1175_354	5	12.45
Tdurum_contig11121_739	5	12.45
wsnp_Ex_c15100_23284023	5	12.45
wsnp_Ex_c41283_48141201	5	12.45
wsnp_Ex_c47763_52874806	5	12.45
wsnp_Ex_c51776_55603135	5	12.45
wsnp_Ex_c763_1503467	5	12.45
wsnp_Ex_rep_c69034_67935465	5	12.45
wsnp_Ku_c32404_42016343	5	12.45
wsnp_Ra_c27831_37346894	5	12.45
wsnp_RFL_Contig1944_1115756	5	12.45
wsnp_RFL_Contig3396_3515504	5	12.45
wsnp_RFL_Contig4734_5671036	5	12.45
Excalibur_rep_c102501_63	5	12.45
IAAV2383	5	12.45
BobWhite_c8340_511	5	12.45
BS00048031_51	5	12.45
BS00070870_51	5	12.45
BS00101401_51	5	12.45
Excalibur_c46082_440	5	12.45
GENE-1606_307	5	12.45
GENE-3343_183	5	12.45
IAAV5030	5	12.45
IAAV8768	5	12.45
Ku_c12383_1105	5	12.45
Ku_c14313_1194	5	12.45
Ku_c68484_1276	5	12.45
Kukri_c20889_526	5	12.45
Kukri_c25564_185	5	12.45
Ra_c38505_544	5	12.45
Ra_c38505_555	5	12.45
Ra_c72106_227	5	12.45
RAC875_c17907_181	5	12.45
RAC875_c19138_402	5	12.45
RAC875_c2786_1097	5	12.45
RAC875_c67309_634	5	12.45
RAC875_c8010_155	5	12.45
RAC875_c842_1476	5	12.45
RAC875_c842_1516	5	12.45
RAC875_rep_c105428_270	5	12.45
RAC875_rep_c111698_383	5	12.45
RAC875_rep_c117959_132	5	12.45
RFL_Contig1034_2351	5	12.45
RFL_Contig4921_2420	5	12.45
Tdurum_contig11121_834	5	12.45
Tdurum_contig51995_377	5	12.45
Tdurum_contig51995_474	5	12.45
wsnp_Ex_c11807_18960045	5	12.45
wsnp_Ex_c12269_19597341	5	12.45
wsnp_Ex_c12269_19597415	5	12.45
wsnp_Ex_c12871_20400823	5	12.45
wsnp_Ex_c1335_2556442	5	12.45
wsnp_Ex_c18637_27508578	5	12.45
wsnp_Ex_c2331_4369782	5	12.45
wsnp_Ex_c24731_33983680	5	12.45
wsnp_Ex_c2502_4675968	5	12.45
wsnp_Ex_c25668_34932304	5	12.45
wsnp_Ex_c25668_34932560	5	12.45
wsnp_Ex_c35073_43285821	5	12.45
wsnp_Ex_c37208_45002588	5	12.45
wsnp_Ex_c41283_48140956	5	12.45
wsnp_Ex_c47907_52974924	5	12.45
wsnp_Ex_c9510_15761235	5	12.45
wsnp_Ex_rep_c69034_67934852	5	12.45
wsnp_JD_c3034_4017676	5	12.45
wsnp_Ku_c3286_6111360	5	12.45
wsnp_Ku_c5243_9344536	5	12.45
wsnp_Ra_c10669_17515792	5	12.45
wsnp_Ra_c35889_44345459	5	12.45
wsnp_Ra_c4858_8709000	5	12.45
BS00076630_51	5	12.45
Kukri_c82117_279	5	12.45
wsnp_Ex_c8376_14113519	5	12.45
Excalibur_c26754_433	5	12.45
GENE-1469_196	5	12.45
IAAV3900	5	12.45
Ku_c13307_1116	5	12.45
wsnp_Ra_c11291_18338838	5	12.45
CAP8_c1393_327	5	12.45
Excalibur_c47907_517	5	12.45
Ku_c53625_627	5	12.45
wsnp_Ex_c15269_23491104	5	12.45
Tdurum_contig31037_205	5	13.711
Excalibur_c33545_134	5	13.711
wsnp_Ex_c28930_38008757	5	13.711
wsnp_Ku_c23901_33846711	5	13.711
wsnp_Ra_c34117_42876812	5	13.711
BS00003971_51	5	13.711
IACX6277	5	13.711
Ku_c70534_1215	5	13.711
RAC875_c58159_521	5	13.711
RAC875_s120038_124	5	13.711
Tdurum_contig49981_703	5	13.711
wsnp_Ex_c12750_20243224	5	13.711
wsnp_Ex_c27150_36365659	5	13.711
wsnp_Ex_rep_c69864_68823765	5	13.711
wsnp_Ex_rep_c69864_68824236	5	13.711
wsnp_Ex_rep_c69864_68824319	5	13.711
wsnp_Ex_rep_c66685_65003087	5	13.711
RAC875_c17479_359	5	14.108
Kukri_c37815_53	5	14.935
Kukri_c5615_1214	5	14.935
Excalibur_rep_c107798_68	5	17.054
CAP12_c1787_110	5	21.81
Tdurum_contig50389_317	5	21.81
wsnp_Ku_c44716_51926415	5	21.81
Kukri_c51055_311	5	21.81
Kukri_c60531_131	5	21.81
BobWhite_c23344_457	5	23.912
BobWhite_c16616_482	5	24.322
Tdurum_contig42827_1693	5	24.322
BS00014695_51	5	25.162
IAAV8483	5	25.162
RAC875_c5056_220	5	25.579
BS00066319_51	5	25.579
Excalibur_c39248_485	5	25.579
Kukri_c97654_90	5	25.579
BS00073525_51	5	25.579
wsnp_Ku_c18497_27803432	5	25.976
GENE-1634_405	5	26.782
TA001383-0516	5	26.782
Kukri_c33640_640	5	26.782
Excalibur_c60581_62	5	27.589
BS00047668_51	5	28.402
Kukri_rep_c102151_697	5	48.523
TA002540-0938	5	49.336
RAC875_c52195_324	5	51.018
Kukri_s110037_62	5	51.851
BS00065734_51	5	51.851
Excalibur_c3969_1208	5	51.851
Tdurum_contig55841_351	5	61.493
GENE-3665_61	5	62.306
BobWhite_c12428_371	5	63.546
BS00030652_51	5	63.546
BS00041742_51	5	63.546
BS00065673_51	5	63.546
BS00076751_51	5	63.546
Kukri_c25871_124	5	63.546
Kukri_rep_c86903_184	5	63.546
BS00077819_51	5	63.952
Kukri_c30244_619	5	63.952
wsnp_BE604885A_Ta_2_1	5	63.952
wsnp_Ra_c4373_7946257	5	63.952
BS00023028_51	5	63.952
Excalibur_c24829_189	5	63.952
wsnp_Ex_c10630_17338703	5	63.952
Kukri_c51666_401	5	80.081
Kukri_s117946_404	5	80.487
RAC875_c35074_452	5	80.487
GENE-1934_182	5	80.487
RAC875_c68056_81	5	80.89
Tdurum_contig10458_460	5	82.141
Tdurum_contig67686_633	5	82.551
Tdurum_contig5009_349	5	82.551
Tdurum_contig67686_792	5	82.551
Tdurum_contig67686_851	5	82.551
Tdurum_contig62283_334	5	82.551
RAC875_c53037_181	5	82.96
wsnp_Ex_c45877_51547406	5	83.37
wsnp_Ra_c66411_64796843	5	83.37
Ex_c30020_182	5	83.37
TA005728-0374	5	85.472
wsnp_Ex_c60462_60905848	5	85.882
BobWhite_c8852_116	5	85.882
RAC875_c75663_115	5	85.882
RAC875_c46236_214	5	86.295
BobWhite_c47304_56	5	86.705
Excalibur_rep_c116587_84	5	86.705
Tdurum_contig27982_568	5	86.705
BobWhite_c5246_474	5	86.705
Tdurum_contig51914_740	5	86.705
Tdurum_contig55443_1361	5	86.705
Tdurum_contig75336_402	5	86.705
Tdurum_contig75336_518	5	86.705
Tdurum_contig8674_1236	5	86.705
Tdurum_contig75812_438	5	86.705
RAC875_c38975_411	5	86.705
Tdurum_contig10022_564	5	86.705
Excalibur_c6906_1167	5	87.108
GENE-1464_73	5	87.522
wsnp_BM137927A_Ta_2_1	5	87.522
Ex_c35861_1382	6	0
Excalibur_rep_c109598_66	6	0
Kukri_c27572_1338	6	0
RAC875_c56612_1076	6	0
wsnp_Ex_c35861_43927741	6	0
BobWhite_c8674_595	6	0
Excalibur_c28180_367	6	0
Excalibur_c35861_106	6	0
RAC875_c14370_1319	6	0
Tdurum_contig55560_972	6	0
Tdurum_contig97800_262	6	0
wsnp_Ex_c35861_43926307	6	0
wsnp_Ex_rep_c104327_89077792	6	0
wsnp_Ex_rep_c69342_68276235	6	0
wsnp_Ex_rep_c69342_68276256	6	0
wsnp_Ex_rep_c69919_68881108	6	0
Tdurum_contig42150_3190	6	0.797
Tdurum_contig42150_3198	6	0.797
Tdurum_contig42150_3348	6	0.797
Tdurum_contig42150_3417	6	0.797
Tdurum_contig42150_3440	6	0.797
CAP7_rep_c12940_130	6	2.382
BobWhite_c71_391	6	5.535
Excalibur_c39002_242	6	5.535
wsnp_BF292596A_Ta_1_3	6	5.535
wsnp_BF292596A_Ta_1_1	6	5.535
GENE-1642_397	6	5.535
Excalibur_c24402_471	6	7.111
Excalibur_c46600_919	6	7.111
IACX6054	6	7.972
Kukri_c55381_67	6	7.972
Tdurum_contig29045_84	6	7.972
wsnp_Ku_c458_954940	6	7.972
Kukri_c10210_1387	6	7.972
Kukri_c1308_2782	6	8.881
Excalibur_c41857_814	6	8.881
Kukri_c1308_2236	6	8.881
Kukri_rep_c69970_717	6	8.881
RAC875_c31572_251	6	8.881
RAC875_c31572_281	6	8.881
RFL_Contig2787_634	6	15.406
BS00006822_51	6	21.375
Kukri_c63259_151	6	21.375
RAC875_c79551_167	6	21.375
TA002702-0616	6	21.375
BS00068094_51	6	21.375
BS00091002_51	6	21.375
Kukri_c31546_66	6	21.375
RFL_Contig497_1114	6	21.375
BS00022058_51	6	25.843
Excalibur_c39808_453	6	35.066
Kukri_c17966_561	6	35.066
RAC875_c10194_910	6	35.066
RAC875_c15003_377	6	35.066
wsnp_Ex_c27317_36522052	6	35.066
BS00023337_51	6	35.905
Ra_c23771_496	6	35.905
IAAV1410	6	35.905
IAAV5370	6	35.905
Kukri_c12079_204	6	35.905
Kukri_c8465_54	6	35.905
RAC875_c10194_673	6	35.905
wsnp_CAP11_rep_c4226_1995152	6	35.905
wsnp_Ex_c12341_19693090	6	35.905
wsnp_Ex_c1894_3575749	6	35.905
BS00081610_51	6	35.905
Excalibur_c29600_173	6	35.905
BobWhite_c38444_238	6	37.004
RAC875_c15109_106	6	46.266
BS00064472_51	6	46.266
Excalibur_c49743_97	6	46.266
Excalibur_rep_c110501_525	6	46.266
GENE-0477_241	6	46.266
RFL_Contig4282_1420	6	46.266
wsnp_BG262734A_Ta_2_3	6	46.266
wsnp_BG262734A_Ta_2_7	6	46.266
wsnp_CAP11_c68_106078	6	46.266
wsnp_CAP12_c15_9559	6	46.266
Kukri_c10751_1031	6	47.486
wsnp_Ex_c15475_23756906	6	47.486
BS00020459_51	6	47.486
BS00049977_51	6	47.486
IAAV7454	6	47.486
Kukri_c10751_158	6	47.486
wsnp_Ex_c15475_23757972	6	47.486
Kukri_c10751_264	6	47.486
Kukri_c10751_860	6	47.486
wsnp_Ex_c1533_2930233	6	49.491
RAC875_rep_c90531_283	6	51.916
BS00067940_51	6	60.989
BobWhite_c62252_472	6	60.989
IAAV2216	7	0
BS00069271_51	7	0.82
BS00035307_51	7	2.06
RAC875_c16277_737	7	18.005
Excalibur_c12032_1101	7	18.005
Tdurum_contig59603_74	7	18.005
Tdurum_contig59603_94	7	18.005
Kukri_c2963_272	7	18.005
Ex_c7626_444	7	31.188
Ku_c7594_1179	7	31.188
Ra_c74035_586	7	31.188
wsnp_Ex_c22913_32130617	7	34.672
CAP12_c2677_138	7	36.792
RAC875_c58868_397	7	36.792
RAC875_c32657_295	7	37.619
Jagger_c10704_106	7	38.839
RAC875_c1606_644	7	39.242
Excalibur_c30624_304	7	39.242
Ku_c3891_395	7	39.242
Ku_c766_2292	7	39.242
Kukri_c62796_500	7	39.242
RAC875_c28178_889	7	39.242
wsnp_Ku_rep_c102527_89481571	7	39.242
BS00011060_51	7	44.168
Kukri_c22231_87	7	44.168
wsnp_Ex_c54453_57331510	7	44.168
wsnp_Ex_c20386_29451037	7	44.575
RAC875_c754_120	7	44.985
wsnp_Ex_c5690_9994305	7	46.68
wsnp_Ex_c5690_9994334	7	46.68
Kukri_c4559_278	7	48.39
wsnp_Ex_c36701_44603531	7	48.39
Ra_c7973_1185	7	50.935
wsnp_Ra_c10536_17322563	7	50.935
Kukri_c6199_1183	7	50.935
Tdurum_contig13140_69	7	50.935
wsnp_Ku_rep_c76865_75281903	7	50.935
RAC875_c31051_490	7	51.735
Ex_c40210_281	7	52.996
Kukri_c46421_168	7	52.996
Tdurum_contig34920_104	7	53.409
BobWhite_c17999_112	7	53.806
Excalibur_c4283_201	7	53.806
GENE-2637_396	7	53.806
GENE-2637_94	7	53.806
RAC875_rep_c73827_306	7	53.806
RAC875_rep_c77874_269	7	53.806
wsnp_Ex_c10186_16720660	7	53.806
wsnp_Ex_c9094_15139750	7	53.806
wsnp_Ex_rep_c66930_65358529	7	53.806
wsnp_JD_c5620_6774675	7	53.806
wsnp_Ku_c61953_63254478	7	53.806
Excalibur_c10390_104	7	53.806
Kukri_c16665_595	7	53.806
RAC875_c110384_153	7	53.806
RAC875_c14911_1282	7	53.806
RAC875_c38663_2179	7	53.806
RAC875_c59416_158	7	53.806
RAC875_c9526_88	7	53.806
RAC875_rep_c69241_454	7	53.806
RAC875_rep_c74695_101	7	53.806
RFL_Contig1053_65	7	53.806
TA004056-0809	7	53.806
wsnp_BE497618A_Ta_1_1	7	53.806
wsnp_CAP7_c32_19340	7	53.806
wsnp_Ex_c10390_17007929	7	53.806
wsnp_Ex_c10463_17113256	7	53.806
wsnp_Ex_c12818_20334933	7	53.806
wsnp_Ex_c31173_39999624	7	53.806
wsnp_Ex_c6044_10590220	7	53.806
wsnp_Ex_rep_c69890_68851948	7	53.806
wsnp_JD_c14769_14413046	7	53.806
wsnp_Ku_c11945_19406789	7	53.806
wsnp_Ku_c14515_22860258	7	53.806
wsnp_Ra_rep_c107017_90667618	7	53.806
GENE-2768_150	7	53.806
TA001684-0426	7	53.806
RFL_Contig5998_745	7	54.206
Ex_c5979_1449	7	54.206
Excalibur_c10157_180	7	54.206
tplb0051b16_1324	7	54.206
wsnp_CAP7_c2931_1395666	7	54.206
wsnp_Ex_c5979_10480527	7	54.206
RAC875_c65221_438	7	55.012
tplb0022j01_1046	7	55.012
wsnp_Ku_c48043_54334230	7	55.012
Excalibur_c18575_310	7	55.012
Excalibur_c32366_122	7	55.012
Excalibur_rep_c80895_175	7	55.012
Excalibur_rep_c80895_284	7	55.012
Kukri_c48385_121	7	55.012
Kukri_c9578_2045	7	55.012
wsnp_Ex_c30876_39741201	7	55.012
wsnp_Ex_rep_c70327_69270561	7	55.012
wsnp_Ku_c5979_10559245	7	55.012
Kukri_c13991_279	7	55.422
Kukri_c13991_655	7	55.422
CAP12_c5519_132	7	55.422
Kukri_rep_c94421_94	7	55.422
BobWhite_c48455_818	7	55.832
Ex_c23792_486	7	55.832
IAAV125	7	55.832
Ra_c30013_483	7	55.832
wsnp_Ex_c2266_4247520	7	55.832
wsnp_Ra_c33762_42584098	7	55.832
BS00103813_51	7	55.832
Excalibur_c31814_298	7	55.832
IAAV1461	7	55.832
IAAV6223	7	55.832
IAAV7636	7	55.832
Kukri_c2634_487	7	55.832
Kukri_c39882_203	7	55.832
Kukri_c61419_550	7	55.832
RAC875_c5394_1052	7	55.832
tplb0024j12_840	7	55.832
wsnp_BE398523A_Ta_2_1	7	55.832
wsnp_Ex_c10886_17694220	7	55.832
wsnp_Ex_c11663_18779609	7	55.832
wsnp_Ex_c12_21212	7	55.832
wsnp_Ex_c13623_21404172	7	55.832
wsnp_Ex_c3463_6348659	7	55.832
wsnp_Ex_c3463_6348808	7	55.832
wsnp_Ex_c5492_9691241	7	55.832
wsnp_Ex_c5492_9691880	7	55.832
wsnp_Ex_c56880_58824784	7	55.832
wsnp_Ex_c8092_13695482	7	55.832
wsnp_Ex_c9464_15689857	7	55.832
wsnp_Ex_rep_c101826_87124211	7	55.832
wsnp_Ex_rep_c67779_66463916	7	55.832
wsnp_Ku_c10224_16965872	7	55.832
Kukri_c48199_102	7	56.239
BS00023151_51	7	77.838
BS00021727_51	7	77.838
Kukri_c27874_515	7	79.994
wsnp_Ex_c13031_20625900	7	79.994
wsnp_Ex_rep_c66324_64493429	7	79.994
IAAV615	7	79.994
Ex_c66324_1151	7	80.828
wsnp_Ex_c5470_9657856	7	85.304
wsnp_Ku_c2317_4448102	7	85.304
Ku_c6779_1381	7	85.304
Tdurum_contig97887_268	7	86.944
wsnp_Ex_c19207_28125072	7	86.944
Tdurum_contig47148_651	7	88.215
RAC875_c25124_182	7	90.826
wsnp_Ku_c3237_6024936	7	93.437
wsnp_Ex_c24474_33721784	7	93.437
wsnp_Ku_c4924_8816643	7	94.688
Tdurum_contig42526_994	7	95.507
Excalibur_c46394_762	7	96.334
Excalibur_rep_c107908_308	7	96.334
BS00108849_51	7	102.914
RAC875_c20429_903	7	103.747
wsnp_Ex_c41074_47987860	7	103.747
BS00065444_51	7	105.443
Ex_c57499_418	7	105.443
Excalibur_rep_c114451_411	7	105.443
Kukri_c6224_492	7	105.443
Excalibur_c57499_268	7	105.443
Kukri_c59705_167	7	108.957
RAC875_c961_341	7	108.957
JD_c4438_839	7	108.957
Kukri_c20719_949	7	108.957
BobWhite_c20282_164	7	110.187
Kukri_c25832_687	7	110.187
Kukri_c25832_794	7	110.187
Tdurum_contig47858_908	7	113.157
wsnp_Ex_c2288_4293430	7	114.867
RAC875_c56535_256	7	114.867
Excalibur_c5624_1026	7	115.283
Excalibur_c5624_845	7	115.283
Kukri_c34435_265	7	115.283
Kukri_rep_c106490_583	7	115.283
tplb0033c09_1345	7	115.283
Kukri_c29142_1046	7	115.283
Kukri_c29142_450	7	115.283
Kukri_c29142_473	7	115.283
Kukri_c29142_747	7	115.283
RAC875_c278_2934	7	115.283
RAC875_c8472_1174	7	115.283
RAC875_c88582_131	7	116.117
RAC875_c88582_316	7	116.117
RFL_Contig4336_184	7	116.117
BS00065619_51	7	137.436
BS00110021_51	7	137.436
Excalibur_c39447_143	7	137.436
Kukri_c976_439	7	137.436
D_GCE8AKX02GF3QZ_210	7	137.839
BS00039811_51	7	139.069
BS00093289_51	7	139.069
BobWhite_c20322_153	7	140.736
BobWhite_c20322_559	7	140.736
BS00045546_51	7	140.736
BobWhite_c11327_185	7	140.736
BobWhite_c11327_491	7	140.736
BobWhite_c20306_111	7	140.736
BobWhite_c20322_183	7	140.736
IAAV2823	7	140.736
Tdurum_contig47783_676	7	140.736
BS00021030_51	7	140.736
BS00045454_51	7	140.736
BS00045554_51	7	140.736
BS00070687_51	7	140.736
BS00075048_51	7	140.736
JD_c581_466	7	140.736
Kukri_c20783_367	7	140.736
RFL_Contig3424_931	7	140.736
Tdurum_contig10482_110	7	140.736
wsnp_Ku_c20783_30448706	7	140.736
BobWhite_c20306_88	7	140.736
BS00000577_51	7	141.14
BS00066336_51	7	141.14
BS00032622_51	7	141.14
BS00048067_51	7	141.14
BS00064494_51	7	141.14
BS00100441_51	7	141.14
Excalibur_c30151_67	7	141.14
Excalibur_c7753_51	7	141.14
GENE-0689_30	7	141.14
GENE-0689_776	7	141.14
GENE-0689_791	7	141.14
IAAV1125	7	141.14
Kukri_c27648_350	7	141.14
Kukri_c48194_641	7	141.14
RAC875_c6280_292	7	141.14
RFL_Contig3841_1986	7	141.14
Tdurum_contig41127_265	7	141.14
Tdurum_contig75819_1117	7	141.14
Tdurum_contig75819_1220	7	141.14
Tdurum_contig75819_1471	7	141.14
BS00091561_51	7	141.14
BS00099982_51	7	141.14
IAAV2388	7	141.14
RAC875_c17185_666	7	141.14
RFL_Contig3841_2313	7	141.14
RFL_Contig3841_2409	7	141.14
RFL_Contig3841_2433	7	141.14
RFL_Contig3841_2595	7	141.14
RFL_Contig3841_3051	7	141.14
Tdurum_contig75819_1309	7	141.14
Tdurum_contig75819_1591	7	141.14
Tdurum_contig93100_149	7	141.14
Tdurum_contig93100_77	7	141.14
wsnp_CAP7_c254_138937	7	141.14
wsnp_CAP7_c254_139077	7	141.14
BobWhite_c5649_344	7	141.14
Kukri_c25115_740	7	141.14
BS00010645_51	7	141.14
Excalibur_c77192_78	7	141.14
IAAV6615	7	141.14
Jagger_c2200_347	7	141.14
Tdurum_contig60420_746	7	141.14
Kukri_c18346_556	7	141.543
Kukri_c35451_857	7	142.763
BS00022395_51	7	146.789
Excalibur_c19666_961	7	146.789
Excalibur_c19666_989	7	146.789
Kukri_c17754_1179	7	146.789
RAC875_c40654_206	7	146.789
RAC875_c7734_411	7	146.789
RFL_Contig4686_700	7	146.789
wsnp_Ku_c15531_24168235	7	146.789
Excalibur_c19666_203	7	146.789
Excalibur_c22896_149	7	146.789
RAC875_c22936_495	7	146.789
RAC875_c67397_116	7	146.789
BS00021957_51	7	148.946
CAP12_c2972_140	7	148.946
RFL_Contig4095_1201	7	148.946
wsnp_RFL_Contig3501_3652740	7	149.352
TA004912-0408	7	149.755
Excalibur_c14217_1260	7	149.755
Ra_c16330_1197	7	149.755
Kukri_c17417_797	7	150.159
Kukri_c17417_291	7	150.159
Kukri_c17417_407	7	150.159
Kukri_rep_c96828_86	7	150.159
Kukri_c17417_571	7	150.562
Ku_c12469_837	8	0
Ku_c12469_983	8	0
Ra_c3966_2205	8	0
wsnp_Ex_c5978_10478584	8	0
BS00048892_51	8	0
Excalibur_c49550_97	8	0.84
tplb0050c03_1003	8	9.497
CAP11_c1685_149	8	9.497
Excalibur_c84439_196	8	9.497
Kukri_c6266_260	8	9.497
RAC875_c3964_752	8	9.497
wsnp_Ex_c790_1554988	8	9.497
wsnp_CAP11_c1506_840938	8	10.31
wsnp_CAP11_c1506_840951	8	10.31
BS00022753_51	8	10.31
BS00022754_51	8	10.31
BS00063973_51	8	10.31
BS00074855_51	8	10.31
Excalibur_c99584_170	8	10.31
wsnp_Ku_c42416_50159250	8	10.31
BobWhite_c14689_172	8	13.735
D_contig04922_546	8	13.735
IAAV8042	8	13.735
Ku_c21235_676	8	13.735
RAC875_c40928_60	8	13.735
wsnp_Ex_c3772_6866645	8	13.735
Ku_c5215_1361	8	13.735
wsnp_Ex_c2526_4715978	8	13.735
wsnp_Ex_c31672_40435001	8	16.279
Kukri_c28555_114	8	25.108
wsnp_Ku_c18023_27232712	8	42.85
BS00067351_51	8	42.85
Kukri_rep_c91370_381	8	42.85
wsnp_Ra_c3095_5835193	8	42.85
BS00055102_51	8	42.85
BS00063793_51	8	42.85
BS00065915_51	8	42.85
Kukri_c18023_553	8	42.85
wsnp_Ex_c2441_4568016	8	42.85
D_contig11267_712	8	42.85
RAC875_c47328_483	8	44.503
BS00022838_51	8	52.67
BobWhite_rep_c63332_67	8	52.67
CAP8_c3064_95	8	52.67
Ra_c10380_534	8	52.67
Tdurum_contig42962_2138	8	57.187
BobWhite_rep_c50013_65	8	58.027
BobWhite_c8906_83	8	58.027
BobWhite_rep_c57286_122	8	58.027
Kukri_c75091_154	8	58.027
Kukri_c75091_220	8	58.027
RAC875_c32639_395	8	58.027
wsnp_Ex_c23795_33033010	8	58.027
wsnp_Ex_c23795_33033150	8	58.027
wsnp_Ex_c23795_33033959	8	58.027
wsnp_Ex_c26968_36188964	8	58.027
wsnp_Ku_rep_c71232_70948744	8	58.027
Excalibur_c1954_930	8	58.868
IAAV3916	8	59.715
RAC875_c54693_298	8	60.556
Excalibur_c32414_705	8	60.556
wsnp_Ra_c25624_35192195	8	60.556
wsnp_Ex_c3136_5798236	8	61.849
Ku_c19516_384	8	62.28
wsnp_CAP11_c1116_654940	8	63.128
wsnp_Ex_c2505_4679749	8	64.41
BS00020605_51	8	67.539
BobWhite_c11539_336	8	80.172
GENE-2673_1010	8	80.172
Excalibur_c2171_2728	8	80.582
Kukri_rep_c86966_163	8	80.582
BobWhite_c47401_491	8	80.582
BS00000006_51	8	80.582
wsnp_Ex_c20899_30011827	8	80.582
wsnp_Ex_c2171_4072774	8	80.582
wsnp_Ex_c2171_4072995	8	80.582
wsnp_Ex_c2171_4073721	8	80.582
wsnp_Ex_c2171_4074003	8	80.582
Ra_c69221_1167	9	0
wsnp_Ex_c28827_37918346	9	0
wsnp_JD_rep_c61843_39601402	9	0
Kukri_c60091_331	9	0
wsnp_Ra_rep_c69221_66574148	9	0
Ku_c102710_1055	9	1.667
BobWhite_c15454_63	9	7.045
CAP12_c667_143	9	7.045
Kukri_c42466_392	9	7.045
TA003225-1427	9	7.045
TA004818-0715	9	7.045
Tdurum_contig45240_1309	9	7.045
wsnp_Ex_rep_c68515_67349716	9	7.045
BS00034303_51	9	7.045
BS00034304_51	9	7.045
BS00062427_51	9	7.045
BS00063425_51	9	7.045
BS00063822_51	9	7.045
BS00063823_51	9	7.045
BS00070903_51	9	7.045
Ku_c21587_754	9	7.045
Ra_c144_1023	9	7.045
Ra_c33743_472	9	7.045
RAC875_c13_1458	9	7.045
RAC875_c13_1589	9	7.045
RAC875_c13_1965	9	7.045
RAC875_c13_2330	9	7.045
TA003225-0566	9	7.045
Tdurum_contig49844_958	9	7.045
tplb0031i04_452	9	7.045
wsnp_Ex_c4666_8349206	9	7.045
wsnp_Ex_rep_c68515_67349904	9	7.045
wsnp_Ex_rep_c72507_70869798	9	7.045
wsnp_Ra_c13_24540	9	7.045
TA002230-0886	9	7.045
Kukri_c31786_657	9	7.045
RAC875_rep_c73524_82	9	7.045
wsnp_Ex_c12440_19836844	9	7.045
wsnp_Ex_rep_c113621_94394656	9	7.045
wsnp_Ex_rep_c70343_69286072	9	7.045
wsnp_Ex_rep_c70343_69286263	9	7.045
BS00022683_51	9	8.726
BS00046529_51	9	8.726
Tdurum_contig5481_252	9	8.726
BobWhite_c17440_130	9	11.293
Excalibur_c65171_418	9	11.293
Kukri_c5501_1515	9	11.703
BS00022500_51	9	11.703
Excalibur_c7180_862	9	11.703
Excalibur_c22052_303	9	12.516
BS00022003_51	9	12.929
Tdurum_contig102312_245	9	12.929
BobWhite_c14705_487	9	12.929
Tdurum_contig48766_257	9	12.929
wsnp_Ex_rep_c68441_67261679	9	12.929
RAC875_c4033_192	9	13.346
BS00034704_51	9	13.346
GENE-3583_319	9	13.752
Kukri_c27691_226	9	13.752
RAC875_c7794_542	9	13.752
RAC875_c95309_460	9	13.752
BS00065693_51	9	13.752
BS00066569_51	9	13.752
IAAV3512	9	13.752
IAAV9057	9	13.752
Kukri_c45983_524	9	13.752
Kukri_c7633_724	9	13.752
wsnp_JD_c1796_2496653	9	13.752
BS00021939_51	9	14.572
BS00005311_51	9	14.978
BS00076256_51	9	14.978
tplb0039m09_92	9	14.978
wsnp_Ku_c30743_40542247	9	14.978
BobWhite_c2236_111	9	16.239
BS00109052_51	9	16.239
Tdurum_contig4731_1108	9	16.239
Tdurum_contig62767_426	9	16.652
BS00000615_51	9	17.066
BS00076190_51	9	17.066
wsnp_Ex_rep_c67292_65834396	9	17.066
Excalibur_c24638_380	9	17.066
JD_c64219_207	9	17.469
RAC875_c48455_224	9	17.469
GENE-3101_137	9	19.15
Tdurum_contig43874_1129	9	19.15
Excalibur_c6314_91	9	19.56
Kukri_c2621_610	9	19.56
wsnp_Ex_c19647_28632894	9	19.56
BS00070259_51	9	19.966
IAAV2127	9	19.966
RFL_Contig4500_912	9	20.786
BS00066916_51	9	20.786
BS00070260_51	9	20.786
Excalibur_c47264_322	9	20.786
Excalibur_c56861_322	9	20.786
Kukri_c30875_283	9	20.786
Kukri_rep_c68263_453	9	20.786
RAC875_c22020_280	9	20.786
Tdurum_contig11054_307	9	20.786
wsnp_Ku_c14958_23427256	9	20.786
wsnp_Ku_c6319_11093041	9	22.026
BobWhite_c32495_258	9	22.026
BS00065389_51	9	22.026
Tdurum_contig4567_1467	9	22.026
BS00090309_51	9	22.86
Kukri_c41797_393	9	23.269
Ex_c19057_965	9	29.206
BobWhite_c5748_756	9	29.616
BS00015653_51	9	29.616
BS00022815_51	9	29.616
IACX6241	9	29.616
Kukri_c36630_225	9	29.616
Kukri_c9468_831	9	29.616
RAC875_c6719_738	9	29.616
GENE-3440_199	9	29.616
Kukri_c53586_128	9	29.616
tplb0051d06_1385	9	29.616
tplb0057m23_1318	9	29.616
tplb0057m23_413	9	29.616
BobWhite_rep_c64197_143	9	30.443
BobWhite_c13238_386	9	37.976
RAC875_c232_1895	9	39.216
BobWhite_rep_c61813_322	9	40.042
BS00107192_51	9	40.042
IAAV3514	9	40.042
Kukri_c14275_674	9	40.042
wsnp_Ku_c14275_22535576	9	40.042
wsnp_Ku_c14275_22535693	9	40.042
Kukri_rep_c104877_2166	9	42.162
BS00100107_51	9	43.858
BS00100108_51	9	43.858
IAAV2363	9	43.858
wsnp_Ex_c7383_12654806	9	43.858
wsnp_Ex_c7383_12655410	9	43.858
wsnp_Ex_c7383_12655468	9	43.858
wsnp_Ex_c7383_12655992	9	43.858
BS00009531_51	9	45.108
Ra_c9938_1299	9	45.108
Tdurum_contig11933_1503	9	45.108
BS00069175_51	9	45.108
IACX7820	9	45.108
IACX8002	9	45.108
Ra_c9938_1734	9	45.108
wsnp_BE405849A_Ta_1_1	9	45.108
BobWhite_c6759_365	9	47.21
CAP8_c1066_309	9	47.21
Ku_c47168_563	9	47.21
RAC875_c1437_1644	9	47.21
wsnp_Ex_c7168_12311649	9	47.21
IAAV7514	9	48.877
BS00094342_51	9	48.877
Kukri_c31411_690	9	48.877
Kukri_c35386_189	9	48.877
wsnp_Ku_c35386_44598937	9	48.877
wsnp_Ku_c15816_24541162	9	50.962
BS00060445_51	9	50.962
Excalibur_rep_c111546_167	9	50.962
IAAV5294	9	50.962
Ku_c4925_624	9	50.962
BobWhite_c9057_118	9	53.983
BobWhite_c5457_1440	9	55.233
IACX424	9	55.233
RAC875_c49940_385	9	55.233
BobWhite_rep_c64318_615	9	55.233
Excalibur_c6567_845	9	55.233
Kukri_c14056_497	9	55.233
RAC875_c28819_281	9	55.233
RAC875_c28819_320	9	55.233
wsnp_BE495277A_Ta_2_1	9	55.233
wsnp_BE495277A_Ta_2_5	9	55.233
wsnp_Ex_c49211_53875575	9	55.639
wsnp_Ex_c49211_53875600	9	55.639
GENE-3791_463	9	56.459
TA004548-0753	9	56.459
BobWhite_c11512_157	9	57.279
BS00065313_51	9	57.279
BS00085826_51	9	57.279
Excalibur_c22783_765	9	57.279
Excalibur_c2598_2052	9	57.279
Kukri_c63163_141	9	57.279
RAC875_c31670_389	9	57.279
RAC875_c68120_285	9	57.279
RAC875_c8690_446	9	57.279
JD_c5000_410	9	58.529
Kukri_c13590_344	9	58.529
wsnp_Ex_c24215_33462239	9	58.529
CAP11_c3591_72	9	58.529
Excalibur_c12332_217	9	59.79
Excalibur_c12332_161	9	59.79
RAC875_c25072_389	9	59.79
RAC875_c8544_646	9	59.79
BS00023076_51	9	59.79
BS00094388_51	9	59.79
Jagger_c7747_323	9	59.79
wsnp_Ex_c4244_7662955	9	59.79
BS00066318_51	9	59.79
BS00022818_51	9	59.79
BobWhite_c7114_237	10	0
Kukri_rep_c95804_119	10	0.413
TA004832-0873	10	2.98
wsnp_Ex_c6209_10838456	10	3.793
BS00099534_51	10	4.626
Excalibur_c6714_246	10	8.653
BS00022116_51	10	9.059
RAC875_c68530_59	10	9.879
TA003745-0632	10	12.424
TA006089-0703	10	13.25
RFL_Contig4979_4240	10	13.25
IAAV2776	10	13.25
Tdurum_contig12695_337	10	16.245
wsnp_Ku_c9559_16000086	10	16.245
Kukri_c9358_269	10	16.245
IACX5832	10	16.245
Excalibur_c1110_978	10	16.245
Excalibur_c1110_328	10	16.245
BS00031073_51	10	16.245
wsnp_Ex_c57094_58953404	10	16.245
BS00101071_51	10	16.245
BS00003696_51	10	16.245
wsnp_Ex_c28908_37989320	10	17.079
BS00086096_51	10	17.079
wsnp_Ex_c11992_19213872	10	20.624
RFL_Contig3352_463	10	20.624
Excalibur_rep_c115510_314	10	32.841
RFL_Contig3674_847	10	32.841
Excalibur_c17904_437	10	32.841
Tdurum_contig76911_950	11	0
RAC875_c32053_291	11	0.813
Tdurum_contig57672_482	11	0.813
BobWhite_c44549_83	11	5.172
wsnp_Ex_c15378_23638822	11	7.239
wsnp_Ex_c15378_23639387	11	7.239
Jagger_c2853_75	11	8.879
Tdurum_contig92819_647	11	8.879
IAAV4950	11	9.692
Kukri_c77911_260	11	17.781
GENE-3659_104	11	18.191
GENE-3659_162	11	18.191
BS00066623_51	11	20.735
BS00037223_51	11	22.375
BS00036033_51	11	22.375
BS00066605_51	11	22.375
GENE-4249_885	11	22.375
Kukri_c10879_164	11	22.375
RAC875_c13785_2042	11	22.375
BS00005019_51	11	22.375
BS00063215_51	11	22.375
BS00065633_51	11	22.375
BS00071706_51	11	22.375
BS00071708_51	11	22.375
BS00073872_51	11	22.375
BS00074752_51	11	22.375
BS00084250_51	11	22.375
BS00084251_51	11	22.375
Excalibur_c41490_397	11	22.375
IAAV5035	11	22.375
IAAV7790	11	22.375
Ku_c45494_267	11	22.375
RAC875_c7560_398	11	22.375
RAC875_rep_c72327_349	11	22.375
wsnp_CAP11_c1244_714229	11	22.375
wsnp_CAP12_c1226_628910	11	22.375
wsnp_Ex_c8741_14630167	11	22.375
wsnp_JD_c10969_11530496	11	22.375
wsnp_JD_c34368_25929293	11	22.375
wsnp_JD_c3839_4902725	11	22.375
wsnp_JD_rep_c48797_33040150	11	22.375
wsnp_JD_rep_c62949_40140212	11	22.375
wsnp_Ku_c4296_7807837	11	22.375
IAAV8493	11	22.775
Ku_c18430_1287	11	22.775
wsnp_Ku_c22358_32187765	11	22.775
BobWhite_rep_c63152_444	11	23.179
Ex_c24379_1031	11	23.179
Ku_c21399_772	11	23.179
Ku_c56003_719	11	23.179
Ra_c11721_766	11	23.179
Tdurum_contig29629_437	11	23.179
tplb0056d17_78	11	23.179
tplb0057g20_780	11	23.179
BobWhite_c2568_115	11	23.179
BS00010780_51	11	23.179
BS00022836_51	11	23.179
BS00028263_51	11	23.179
BS00074433_51	11	23.179
BS00087447_51	11	23.179
CAP12_c118_95	11	23.179
Excalibur_c2834_397	11	23.179
Excalibur_c53981_77	11	23.179
Kukri_c19612_514	11	23.179
Kukri_c19802_710	11	23.179
Kukri_c29966_1223	11	23.179
Kukri_c65887_282	11	23.179
Kukri_rep_c73457_419	11	23.179
Ra_c11721_631	11	23.179
RAC875_c29455_79	11	23.179
RAC875_c691_1486	11	23.179
Tdurum_contig42858_1256	11	23.179
Tdurum_contig42858_1352	11	23.179
tplb0035a03_368	11	23.179
wsnp_Ex_c48789_53586406	11	23.179
wsnp_Ex_c48789_53586502	11	23.179
wsnp_Ex_c15268_23489498	11	23.179
Kukri_c6128_238	11	25.281
RAC875_c104548_369	11	25.281
Tdurum_contig29974_90	11	25.281
Tdurum_contig55363_297	11	25.281
wsnp_CAP12_c928_486444	11	25.281
wsnp_Ku_rep_c102901_89769309	11	25.281
wsnp_Ra_c12086_19452422	11	25.281
Ex_c8890_2497	11	26.094
IAAV4868	11	26.094
IAAV5585	11	26.094
Kukri_rep_c107624_603	11	26.094
RAC875_c20115_1334	11	26.094
BS00066218_51	11	26.094
BS00063966_51	11	26.494
Kukri_c62719_188	11	26.494
Ex_c8890_2370	11	26.494
Ku_c15096_3417	11	26.494
Kukri_c15096_4174	11	26.494
Kukri_rep_c69713_363	11	26.494
wsnp_Ex_c51820_55631329	11	26.494
wsnp_Ku_c1075_2160065	11	26.494
wsnp_Ku_c44079_51438574	11	26.494
BS00030448_51	11	26.494
Kukri_c15096_4206	11	26.494
wsnp_Ex_c36801_44683992	11	26.494
wsnp_Ex_rep_c70951_69806455	11	26.494
wsnp_Ku_c15096_23605606	11	26.494
BS00042195_51	11	26.494
CAP7_c12484_228	11	26.494
Excalibur_c25752_80	11	26.494
GENE-4005_179	11	26.494
Ku_c44079_365	11	26.494
Kukri_rep_c69713_250	11	26.494
TA005055-0844	11	26.494
wsnp_Ex_rep_c70951_69806211	11	26.494
BobWhite_c13845_195	11	26.494
BobWhite_c2143_229	11	26.494
BobWhite_c32372_186	11	26.494
BS00022489_51	11	26.494
BS00081699_51	11	26.494
BS00082640_51	11	26.494
IAAV4068	11	26.494
IAAV5761	11	26.494
IAAV8730	11	26.494
Tdurum_contig69065_319	11	26.494
wsnp_Ex_c51820_55631560	11	26.494
wsnp_Ku_c14219_22455933	11	26.494
GENE-3904_72	11	29.038
wsnp_Ex_c17637_26370812	11	29.038
RAC875_rep_c113839_352	11	29.038
Excalibur_c840_1220	11	29.038
IAAV2501	11	29.038
Kukri_c34083_349	11	29.038
Kukri_c3895_530	11	29.038
Tdurum_contig64910_298	11	29.038
wsnp_Ex_c26147_35395059	11	29.038
wsnp_Ex_c26147_35395259	11	29.038
Excalibur_c2737_309	11	49.821
BobWhite_c1131_328	11	50.224
Tdurum_contig97355_136	11	50.224
Tdurum_contig97355_194	11	50.224
Excalibur_c29639_65	11	58.313
Tdurum_contig29357_338	11	58.313
Tdurum_contig13068_208	11	58.313
RFL_Contig5037_560	11	58.719
RAC875_c93959_96	11	58.719
Tdurum_contig32258_314	11	58.719
BS00021965_51	11	59.126
Excalibur_rep_c69981_75	11	59.939
Kukri_rep_c70063_663	11	62.42
BS00003185_51	11	62.823
Ra_c3533_880	11	64.074
wsnp_Ex_c20457_29526403	11	64.921
Kukri_c57452_1040	11	65.776
wsnp_Ex_rep_c101766_87073440	11	65.776
wsnp_Ex_rep_c67436_66026057	11	67.058
wsnp_Ra_c5346_9501281	11	67.058
Tdurum_contig42520_585	11	67.058
Excalibur_c29240_233	11	68.33
Kukri_c11568_796	11	68.33
RAC875_c60623_72	11	68.33
Kukri_rep_c95718_868	11	69.143
RAC875_c103443_475	11	69.143
BS00103442_51	11	69.143
RAC875_rep_c74051_276	11	69.143
RFL_Contig6053_2072	11	69.553
RFL_Contig6053_3082	11	69.553
Tdurum_contig75700_411	11	71.673
BobWhite_c27145_731	11	71.673
BS00004466_51	11	71.673
wsnp_BE489894A_Ta_2_1	11	72.944
wsnp_Ku_c1318_2624758	11	72.944
BS00029127_51	11	72.944
Tdurum_contig51566_427	11	72.944
Tdurum_contig51566_561	11	72.944
Excalibur_c55844_143	11	72.944
GENE-4222_1080	12	0
RAC875_c48687_681	12	0.417
wsnp_RFL_Contig2765_2513854	12	0.417
BobWhite_rep_c51132_85	12	0.417
BS00088274_51	12	0.417
CAP8_c6448_265	12	0.417
Excalibur_c25390_2483	12	0.417
Excalibur_c30234_130	12	0.417
RFL_Contig2765_1200	12	0.417
RFL_Contig2765_669	12	0.417
RFL_Contig3175_1217	12	0.417
RFL_Contig3175_482	12	0.417
wsnp_RFL_Contig3175_3154256	12	0.417
GENE-3976_118	12	0.417
RFL_Contig2765_2274	12	0.417
BobWhite_c35035_85	12	2.141
RAC875_c13595_669	12	2.141
RAC875_c26158_929	12	2.141
wsnp_CAP12_rep_c4048_1842112	12	2.141
BobWhite_c40602_313	12	2.141
D_contig32490_278	12	2.141
Excalibur_rep_c103232_355	12	2.141
RAC875_c27781_591	12	2.141
Tdurum_contig11275_461	12	2.141
Tdurum_contig97520_902	12	2.141
tplb0026o20_691	12	2.141
BobWhite_c9681_769	12	2.141
BobWhite_c13504_378	12	2.141
BobWhite_c24258_496	12	2.141
BobWhite_c37804_181	12	2.141
BS00003485_51	12	2.141
BS00017018_51	12	2.141
BS00022362_51	12	2.141
BS00064182_51	12	2.141
BS00071855_51	12	2.141
BS00078214_51	12	2.141
BS00080394_51	12	2.141
BS00080399_51	12	2.141
BS00091539_51	12	2.141
BS00093844_51	12	2.141
BS00099879_51	12	2.141
CAP7_rep_c6384_381	12	2.141
D_GDEEGVY02GMZ4L_337	12	2.141
Excalibur_c19182_226	12	2.141
GENE-3852_1100	12	2.141
GENE-3852_857	12	2.141
GENE-3862_103	12	2.141
GENE-3862_178	12	2.141
GENE-3862_349	12	2.141
GENE-3871_109	12	2.141
GENE-3871_337	12	2.141
GENE-3933_586	12	2.141
GENE-3948_357	12	2.141
GENE-3988_79	12	2.141
IAAV7160	12	2.141
Kukri_c30754_229	12	2.141
Kukri_c45702_439	12	2.141
Kukri_rep_c106022_483	12	2.141
Kukri_rep_c70994_104	12	2.141
RAC875_c13595_438	12	2.141
RAC875_c28339_128	12	2.141
RAC875_c77791_840	12	2.141
wsnp_Ex_c749_1472258	12	2.558
RFL_Contig5262_1500	12	2.558
Excalibur_rep_c69900_395	12	2.968
Excalibur_c5168_1807	12	2.968
Kukri_c1468_1609	12	2.968
Kukri_c1468_1748	12	3.375
Kukri_c41482_311	12	3.375
wsnp_JD_rep_c65886_41872083	12	3.375
Excalibur_rep_c90454_251	12	3.375
Ra_c3356_506	12	3.375
RAC875_c79898_255	12	3.375
wsnp_Ku_c1468_2912654	12	3.375
wsnp_Ku_c1468_2913072	12	3.375
IAAV5595	12	3.375
Jagger_c7132_108	12	3.375
RAC875_c23449_205	12	3.375
IAAV5969	12	3.375
Kukri_c29930_72	12	3.375
Ra_c1709_839	12	3.375
Tdurum_contig83542_138	12	3.375
BS00057487_51	12	3.781
wsnp_Ex_c26771_35998435	12	4.594
BobWhite_c10832_1131	12	4.594
BS00040814_51	12	4.594
BS00046261_51	12	4.594
Kukri_c40994_61	12	4.594
RAC875_c76675_372	12	4.594
RFL_Contig4069_2628	12	4.594
CAP8_c4108_169	12	4.594
BobWhite_c10343_320	12	5.421
GENE-1205_484	12	5.421
IAAV8380	12	5.421
Jagger_c1423_102	12	5.421
wsnp_Ex_c15708_24056750	12	5.421
Excalibur_c48282_143	12	5.827
Tdurum_contig83087_104	12	7.481
BS00053588_51	12	8.731
TA004471-1240	12	9.141
Tdurum_contig50364_1060	12	9.141
Tdurum_contig50364_900	12	9.141
BS00087997_51	12	9.141
BS00110512_51	12	9.544
GENE-3965_551	12	9.544
IAAV5443	12	9.544
RAC875_c41438_223	12	9.544
BS00003818_51	12	9.544
BS00091909_51	12	9.544
GENE-4184_410	12	9.544
RAC875_c4568_60	12	9.544
RAC875_c56259_87	12	9.544
Tdurum_contig10275_384	12	9.544
tplb0050d17_1401	12	9.544
BS00065028_51	12	10.357
Kukri_c45876_61	12	10.357
Excalibur_c22876_1040	12	10.357
GENE-4008_395	12	10.357
GENE-4008_418	12	10.357
wsnp_Ex_c14156_22088738	12	10.357
Kukri_c494_1479	12	10.764
Kukri_c494_1413	12	10.764
wsnp_Ex_c7546_12900094	12	10.764
BS00075667_51	12	10.764
RAC875_c14659_1066	12	11.17
Excalibur_rep_c68708_80	12	11.567
BS00058288_51	12	11.967
BS00063485_51	12	11.967
RFL_Contig1060_2185	12	11.967
BobWhite_c12261_130	12	11.967
Ku_c5353_293	12	11.967
RAC875_c6429_55	12	11.967
Kukri_c32188_60	12	11.967
Ra_c6429_1217	12	11.967
RAC875_c6429_132	12	11.967
wsnp_CAP7_c5487_2464864	12	11.967
Excalibur_s115877_56	12	12.377
wsnp_Ra_c39433_47141896	12	12.377
BS00074152_51	12	12.377
BS00083914_51	12	12.377
wsnp_Ex_c2325_4355706	12	12.377
RAC875_c21938_802	12	12.377
RFL_Contig5722_537	12	12.377
Ex_c28973_935	12	13.203
Ex_c28973_947	12	13.203
Excalibur_c17487_51	12	13.203
IAAV5620	12	13.203
BS00109913_51	12	13.203
Kukri_rep_c70558_246	12	13.203
Tdurum_contig1706_272	12	13.203
wsnp_Ex_c28973_38050756	12	13.203
wsnp_Ex_c29648_38653281	12	13.203
wsnp_Ex_c29648_38653339	12	13.203
wsnp_Ex_c28973_38050405	12	13.203
Tdurum_contig82605_187	12	15.398
Excalibur_rep_c87351_347	12	15.398
RAC875_c8254_594	12	15.398
BobWhite_c5324_168	12	15.398
BS00010129_51	12	15.398
BS00011899_51	12	15.398
BS00078124_51	12	15.398
Excalibur_c6108_394	12	15.398
Excalibur_c98257_136	12	15.398
Kukri_c373_982	12	15.398
Ra_c7741_1403	12	15.398
RFL_Contig2800_257	12	15.398
RFL_Contig2800_905	12	15.398
TA001656-0405	12	15.398
Tdurum_contig10229_127	12	15.398
Tdurum_contig93104_520	12	15.398
wsnp_Ex_c10824_17611901	12	15.398
BobWhite_c19298_232	12	15.821
Ku_c16162_2453	12	16.238
RAC875_c11887_518	13	0
RAC875_c23140_869	13	0
RAC875_c23140_666	13	0
RAC875_c1126_1569	13	0
Excalibur_c4362_165	13	0
RAC875_c25517_1067	13	0
IAAV649	13	0
Excalibur_c24593_1217	13	0
BobWhite_c17904_259	13	0
RAC875_c1126_1769	13	0
Excalibur_c22708_625	13	0
Excalibur_c44794_122	13	0.82
tplb0022c16_494	13	4.92
RAC875_c55351_223	13	7.114
RAC875_c6736_336	13	7.524
wsnp_Ku_c38569_47177068	13	8.379
wsnp_Ex_c14219_22169892	13	8.379
RAC875_c23310_217	13	8.379
Kukri_c74599_85	13	8.379
Excalibur_c78792_203	13	8.379
BS00068864_51	13	8.379
BS00068863_51	13	8.379
BS00028795_51	13	8.379
BS00028794_51	13	8.379
Tdurum_contig46954_406	13	8.379
RAC875_c21165_1058	13	8.379
Kukri_c36885_58	13	8.379
Kukri_c31299_490	13	8.379
Excalibur_c9166_913	13	8.379
Excalibur_c1254_257	13	10.535
RAC875_rep_c114991_394	13	10.535
RAC875_c4336_208	13	10.535
Kukri_rep_c117224_154	13	10.535
BS00010726_51	13	10.535
Tdurum_contig11613_329	13	10.952
CAP7_c1706_56	13	10.952
CAP11_c3214_133	13	11.365
RAC875_c18845_104	13	12.198
Excalibur_c46601_212	13	12.198
[truncated: 5,964 more rows]

## Sheet: Phenotyping Data
Environment/Accession name	3	4	5	6	7	8	9	10	11	12	13	14	16	17	18	19	20	21	22	24	25	26	27	28	29	31	32	33	34	35	36	37	38	39	40	41	42	43	44	46	47	48	49	50	51	52	53	54	55
Protein-2012-Carrington	16.3	17.9	17.1	16.5	16.7	15.2	16.9	17.3	16.1	16.7	16.4	14.9	14.1	15.2	17.1	16	16.3	16.1	16.2	15.6	17.3	17.1	15.6	15.6	17.2	15.9	17	16.8	15.6	15.6	16.7	15.6	16.1	15.7	16.7	15.8	15.9	16.1	15.7	16.5	16	16.3	15.8	15.7	15.7	16.4	15.5	15.7	17.2
Protein-2012-Casselton	14.5	16.2	16.2	15.6	15.6	13.8	15.7	16.1	14.5	15.1	16	14.1	13.6	15	15.6	14.3	16.3	15.3	15.4	13.4	16.4	17.2	14.9	15.2	15.3	15.7	15.9	15.3	14.5	13.8	15	15.5	15.4	14.7	16.1	14.9	14.6	15.5	14.5	14.9	15.4	15.4	14.2	14.9	15.6	16	14.5	15.5	16.7
Protein-2012-Prosper	15.2	16.4	16.1	15.1	15.9	14.4	16.2	16.3	15.2	15.4	15.8	14.2	14.1	14.9	15.7	14.6	15.5	15.7	15.5	14.9	16.3	16.7	15.3	15.1	15.1	15.4	15.5	15.1	14.3	14.8	15	15.5	15.1	15.4	15.9	15.5	15.5	15.5	15.2	15.7	15.5	15.8	14.9	14.7	15	16.3	14.9	15.8	16.4
Protein-2013-Prosper	17.5601	19.2357	16.3744	16.6239	16.8136	15.6178	16.4952	16.1794	15.2302	13.9225	14.035	12.6949	13.8261	15.3998	17.3053	15.6609	16.3102	15.8225	17.3393	14.8179	17.4902	18.1164	13.7995	16.2318	16.2822	15.7855	15.8295	16.7447	14.252	14.4605	14.2908	14.2802	14.4045	13.5245	17.0301	15.6948	15.52	14.7044	13.5735	15.3772	15.2915	17.0578	16.4864	15.0137	16.9669	16.3126	14.644	14.895	17.5828
Protein-2013-Carrington	14.5887	17.453	16.8577	15.4376	16.3883	14.0009	16.1924	16.92	14.4157	14.3707	15.4219	13.0239	13.0176	13.8895	15.723	14.1064	14.633	15.1019	14.4717	12.703	16.3896	17.102	13.8943	13.8684	15.1529	15.2979	14.9316	14.5022	13.3015	15.7053	15.1085	13.7012	13.5878	14.3933	15.6234	15.0098	15.0566	15.3899	15.064	14.0909	13.6048	14.5592	14.2789	13.619	14.2171	14.3897	13.4236	15.6843	16.4049
Protein-2013-Minot	15.6972	17.3124	16.6332	14.9453	16.253	14.7844	16.9115	16.6242	16.1096	14.9772	14.4854	14.5386	14.6088	15.9232	16.8603	15.3421	15.7938	16.5892	16.1469	16.1235	17.2396	17.2322	16.6	14.8227	16.651	16.0054	15.9031	16.2078	13.2622	14.3288	15.3206	14.0532	12.6776	11.9427	13.4108	15.5081	14.8901	15.465	13.8538	14.6993	15.6383	15.5866	15.8819	14.7785	15.5568	16.1085	13.7807	14.7957	14.1128
Protein-2014-Prosper	15.1418	16.5252	15.8543	14.7009	15.6013	14.3357	15.7744	15.6868	15.1425	14.9504	15.2527	13.7206	13.1615	14.4024	15.3579	14.1825	14.6252	15.1388	14.3876	14.443	15.6662	15.7782	13.3298	13.7439	13.9461	14.3274	15.1314	14.4422	13.8198	14.254	15.6234	14.47	14.6431	14.2689	14.8495	14.2378	14.2959	13.7375	14.2004	15.0877	15.0525	14.6386	13.9398	14.2305	14.5461	14.4462	13.9587	14.8385	15.5899
Protein-2014-Minot	16.2803	17.0422	16.3936	15.4836	17.027	14.7005	16.7206	16.4174	15.6764	16.018	15.9255	15.2493	15.3212	15.392	16.5908	16.2357	15.8457	16.5939	16.0046	16.1737	16.64	16.3091	16.6048	15.2862	16.6169	15.7506	16.5674	16.3031	14.8965	15.5117	16.2145	15.6533	15.7933	16.2053	16.1039	15.5956	15.7903	16.0098	15.7458	16.1006	16.4493	15.5394	15.7483	16.4783	15.6911	16.3283	16.2025	16.1381	16.7353
Protein-2014-Carrington	14.81	16.092	13.2915	14.7411	15.9437	14.2515	15.7278	15.5413	15.3656	15.6087	14.1606	13.3765	13.6881	14.5004	15.6652	13.8464	15.1384	13.655	13.2734	12.877	15.1403	14.7661	14.0372	14.2005	14.2034	15.1748	16.7867	15.8124	14.6883	15.0871	15.6494	14.4535	15.5783	15.5159	16.1108	15.1584	15.5021	13.8411	13.903	15.1604	14.1913	14.3212	14.2898	14.3236	14.8549	15.5417	13.1776	14.8923	16.8038
Protein-Overall-(BLUP)	0.2547	1.5167	0.6874	0.1555	0.8046	-0.5567	0.8406	0.8767	0.03831	-0.01578	0.02028	-1.0434	-1.0705	-0.2411	0.7865	-0.2772	0.2727	0.2456	0.1285	-0.5657	1.0119	1.1742	-0.2952	-0.2952	0.2907	0.1916	0.5612	0.3448	-0.773	-0.3313	0.1375	-0.3493	-0.3583	-0.5116	0.3989	0.01127	-0.01578	-0.09691	-0.4936	0.03831	-0.01578	0.1735	-0.16	-0.3223	0.08339	0.3989	-0.6468	0.08339	0.9217
MixTime-2012-Carrington	2.45	3	3.15	3	2.3	4	2.45	2.3	2.3	2.3	2.3	3.45	3.15	2.45	2.3	3	2.45	2.45	2.3	2.45	2.3	2.45	2.3	2.45	2.3	2.45	3.15	3	3.45	3	3	2.45	3.15	3	2.3	3.3	2.3	3.15	2.45	3	3.15	2.3	2.3	3	3.3	2.45	4	3.15	3
MixTime-2012-Casselton	4	3.3	4	3.3	3.3	3.45	4	3	3	3.3	3.15	4	3.3	3.3	3	4	3.3	3.3	3.15	4.15	3.3	3.3	3.45	3.45	4.3	4	3.3	3.3	4	3.15	3.3	3.3	3.3	3.45	3.15	3.45	3.3	3.45	3.45	3.3	4.3	3.15	3.3	3.3	3.15	4	4.3	3.3	3.15
MixTime-2012-Prosper	3	2.45	3.15	3	2.15	4	2.3	2.45	2.3	3	3.3	4.3	3	2.45	3	4	3.15	3	2.3	3.15	2.45	2.3	3.15	3.15	3.15	3.3	3.15	3.45	4	3	3	2.3	3	3	2.45	3.15	3	3.3	3	3	3.15	2.3	3.15	3	4	3.15	4.3	3.15	3
MixTime-2013-Prosper	2.15	2.45	3.15	2.45	2	3	2	2.45	2.15	2.3	3	3.15	2.3	2.3	2.3	2.3	2.3	2.3	2.15	2.45	3.3	3.15	2.3	2.45	2.3	2.3	2.3	2.3	2.45	2.45	2.3	2.3	2.15	2.15	2.15	2.3	2.3	2.45	2.3	2.45	3	2.3	2.45	2.15	2.45	2.45	2.45	2.45	2.3
MixTime-2013-Carrington	2.3	2.45	2.45	2.45	2.15	2.45	2.3	2.45	2.15	3	3	4	2.45	2.45	2.45	3	3	2.15	2.3	3	3	3	2.3	2.45	3	3	3	3.15	4	2.3	3	2.45	3.15	2.45	2.45	3.45	2.15	2.3	2.15	2.45	3.15	2.15	2.45	2.3	3.45	3	3.3	2.45	3
MixTime-2013-Minot	2.15	2.3	3.15	3.15	2	2.45	2.15	2.45	2.15	2.45	3.15	3.45	2.3	2.3	2.3	3.15	2.45	2.3	2.3	3	3	3.15	2.3	3.15	3.15	3	2.45	2.3	3.3	2.3	2.45	2.45	2.3	2.45	2.3	3	2.45	2.45	2.3	2.45	3	2.45	2.3	2.15	3.3	2.45	2.45	2.45	2.3
MixTime-2014-Prosper	3.3	3.15	4	4	3	3.45	3.3	3	3.3	3.15	3.3	5	3.45	3.15	3	3	3.15	4	2.45	3.3	3.15	3	3.15	3.3	3.3	3.3	2.45	3	3.3	3.15	3.15	2.45	2.45	3.15	3.15	3	3	3.15	3.15	3	3.15	2.45	2.45	3	3.3	3	3.3	3	2.45
MixTime-2014-Minot	3.5	4	4.5	4	3.25	4.5	3.5	3.5	4	4	3.5	4	5	3.75	3.5	4	4	3.5	3.5	3.5	4	3.25	3.5	3.5	4	3.75	5.5	4.25	4.5	3.5	3.75	3.5	4	3.5	3.5	4	3.5	4	3.5	3.25	4.25	3.25	3.75	3.25	4.75	3.5	4.25	3.75	4.75
MixTime-2014-Carrington	3	3	4.3	3	2.3	3.45	2.45	3.3	3	3	3.15	4.15	3.45	3	3	3.15	3.15	3	3	3.3	3.45	3.45	2.45	3.15	4	3.3	3.3	3.45	4	3	3.15	3.3	3.3	3.3	2.45	3.3	3.15	3.15	3.15	3	3.15	2.45	3.15	3	3.45	3.3	4	3.15	3.15
MixTime-Overall-(BLUP)	-0.2022	-0.1781	0.378	0.03952	-0.531	0.2716	-0.3376	-0.2941	-0.3473	-0.1394	-0.00883	0.7309	0.04435	-0.2699	-0.2989	0.1604	-0.09586	-0.1877	-0.4343	0.03468	0.000839	-0.08619	-0.2941	-0.08619	0.1507	0.04435	0.06369	0.02501	0.4892	-0.2022	-0.08135	-0.3328	-0.1104	-0.1442	-0.3908	0.09754	-0.2699	-0.05234	-0.2409	-0.1974	0.2281	-0.4972	-0.2554	-0.2699	0.3103	-0.06201	0.4263	-0.1055	-0.08135
Abs-2012-Carrington	60	60	62	62	60	58	62	60	58	58	62	58	58	58	60	60	58	62	60	62	62	62	58	60	60	58	60	58	58	58	58	60	60	58	60	58	60	58	58	60	58	60	58	60	60	58	60	58	62
Abs-2012-Casselton	62	62	62	60	62	58	62	60	58	60	60	60	58	60	58	58	60	60	60	62	62	64	58	58	60	58	60	58	58	60	58	60	62	58	62	60	60	58	60	62	60	62	60	60	62	60	60	62	62
Abs-2012-Prosper	58	58	60	58	58	58	60	58	56	58	60	56	56	58	60	56	58	60	58	60	60	60	56	58	56	56	58	56	56	56	56	56	58	56	58	56	58	56	56	58	56	58	56	56	56	56	56	56	58
Abs-2013-Prosper	62	62	64	60	58	58	60	60	58	60	64	60	58	60	62	60	60	62	62	64	62	62	58	62	58	60	64	60	60	64	60	64	62	60	64	62	64	60	58	66	62	64	62	62	62	62	62	60	62
Abs-2013-Carrington	58	60	64	62	60	60	62	60	60	62	68	62	60	60	62	62	60	62	60	64	62	62	58	62	60	60	62	58	58	62	60	62	62	58	62	58	60	60	60	62	58	60	60	62	60	60	60	62	60
Abs-2013-Minot	62	62	64	64	62	60	62	62	60	64	66	64	60	60	64	64	62	64	62	66	66	66	62	64	62	62	62	60	62	62	62	64	66	64	64	62	64	62	60	66	62	64	62	64	62	64	64	64	62
Abs-2014-Prosper	62	60	60	62	62	60	60	62	62	60	62	60	60	60	60	60	60	64	62	62	62	62	60	62	60	60	60	60	58	58	60	60	60	58	60	58	58	58	58	60	58	58	60	60	58	58	58	58	58
Abs-2014-Minot	66	62	68	70	70	62	70	64	68	68	66	64	62	68	70	68	66	66	64	66	66	68	66	68	68	64	86	68	68	70	66	68	68	66	70	64	68	68	66	64	66	68	66	66	68	68	68	68	70
Abs-2014-Carrington	58	58	58	60	60	58	60	58	58	58	62	60	58	60	60	60	60	62	60	62	62	62	58	62	60	62	62	58	58	60	62	62	62	58	60	60	60	58	60	62	58	62	60	60	58	58	58	58	60
Abs-Overall-(BLUP)	-0.08791	-0.3893	0.967	0.6656	0.2135	-1.2935	0.6656	-0.3893	-0.8414	2.9261	1.5698	-0.3893	-1.4442	-0.3893	0.5149	-0.08791	-0.3893	0.967	-0.08791	1.4191	1.1177	1.4191	-1.1428	0.5149	-0.3893	-0.6907	1.8712	-0.9921	-0.9921	0.06279	-0.54	0.5149	0.8163	-0.9921	0.8163	-0.8414	0.2135	-0.8414	-0.9921	0.8163	-0.8414	0.5149	-0.3893	0.06279	-0.2386	-0.3893	-0.2386	-0.2386	0.3642
Loaf-Vol-2012-Carrington	212	224	217	211	199	186	227	230	214	219	198	197	187	185	208	190	201	225	205	217	209	230	211	194	216	195	216	209	198	212	205	214	220	215	218	208	204	219	198	205	207	212	209	218	200	199	200	206	207
Loaf-Vol-2012-Casselton	170	190	195	193	181	186	203	222	201	182	186	204	182	178	197	180	201	195	215	173	189	197	193	183	180	187	208	205	197	195	207	196	200	200	205	203	188	210	202	220	221	185	198	209	200	218	175	211	198
Loaf-Vol-2012-Prosper	204	189	183	192	186	168	208	213	198	190	199	177	171	185	204	160	197	202	196	192	211	204	188	190	186	179	192	184	163	204	168	199	194	187	190	201	192	177	186	187	199	193	183	202	172	195	174	198	185
Loaf-Vol-2013-Prosper	214	229	211	203	200	197	195	211	194	182	193	195	202	204	215	200	207	185	214	192	204	210	174	177	184	183	197	216	193	198	190	188	192	177	193	202	191	195	192	201	210	192	216	198	201	206	184	197	208
Loaf-Vol-2013-Carrington	212	218	221	214	201	216	210	228	207	203	211	194	194	201	214	199	205	208	198	195	207	216	200	202	214	211	207	200	195	199	213	195	203	207	212	204	219	197	200	198	194	195	200	200	202	208	194	217	210
Loaf-Vol-2013-Minot	210	207	218	195	200	194	210	213	214	203	190	183	191	190	216	196	211	205	212	210	215	218	212	191	195	174	205	206	192	195	188	181	175	180	184	193	190	188	194	200	218	195	198	195	198	209	190	197	185
Loaf-Vol-2014-Prosper	176	206	224	186	191	164	208	249	217	157	215	203	199	189	198	197	187	206	210	190	227	137	196	162	183	203	157	176	164	212	216	137	207	172	200	200	174	145	208	156	229	155	156	192	197	171	178	170	181
Loaf-Vol-2014-Minot	167	170	234	198	150	175	180	237	161	167	193	207	130	138	174	155	200	178	208	154	200	160	148	158	201	186	180	207	198	202	179	144	123	148	181	240	183	235	173	218	220	170	190	200	144	225	185	139	249
Loaf-Vol-2014-Carrington	203	223	185	178	226	203	191	237	218	223	200	189	173	205	215	166	158	186	163	160	201	251	207	228	197	223	223	228	171	230	221	165	210	206	233	205	202	169	204	206	214	170	179	181	164	192	144	160	217
Loaf-Vol-Overall-(BLUP)	1.0937	6.4904	8.4528	1.2163	-0.9914	-3.7511	5.0185	17.7744	4.5279	-1.4821	2.1362	-0.07155	-7.4307	-4.6097	5.5705	-6.5721	1.0323	2.4428	4.3439	-4.1191	6.9196	4.4666	-1.2981	-3.9964	0.3577	-0.5622	2.1362	4.9572	-4.855	5.9384	2.2589	-8.044	-1.6047	-3.5671	4.0373	6.4904	-0.4395	-0.9301	0.4191	2.5042	9.9246	-5.1003	-1.2981	2.7495	-4.4257	4.4666	-7.7373	-3.3832	5.5091
CBCL-2012-Carrington	8	7	8	7.5	7	7.5	8	8	8	7.5	7	7.5	7.5	8.5	8	7	8	8	8.5	8	7	7.5	7.5	7.5	7.5	8	8	7	7	7.5	8.5	8	8	7.5	7.5	7.5	8	8	7.5	7.5	8	8	7.5	8.5	8	8	8	7	7.5
CBCL-2012-Casselton	7.5	8	8	8	7	7.5	8.5	7.5	8	7.5	7	8	7	7.5	8	8	8	8.5	8	9	7.5	8	7.5	8	7.5	7	8	7.5	8	7.5	7.5	8	8.5	8	7.5	7.5	7.5	7	7.5	8	8	7	7.5	7.5	7.5	7.5	7	7	7.5
CBCL-2012-Prosper	8	7	8.5	9	8	7	8	7.5	7	7	7.5	7.5	7	7.5	8.5	8	8.5	7.5	8	8	8	7.5	7.5	7.5	7	8	7.5	7.5	7.5	8	8	8	8.5	8	7	7.5	7.5	8	7	7.5	8	8	8.5	8	8	8	8	7	7.5
CBCL-2013-Prosper	7.5	7.5	8.5	9	7	8	7.5	7.5	7.5	6.5	8	7	6.5	7.5	8	7	8	7	8	6.5	7.5	7.5	7	7	7	8	7	7.5	7	7	8	7.5	7.5	7.5	8	7	7	7.5	8	7.5	7	8.5	7.5	7	8	7	8	7.5	7.5
CBCL-2013-Carrington	7.5	7.5	8	8.5	8	7.5	8	8.5	8	7.5	8	7	7.5	7.5	8.5	7.5	8	7	7.5	7.5	7.5	7	7.5	8	7.5	7.5	7	7	7	8	7.5	7.5	8	7	8.5	7	7	7.5	8	7	7	7.5	8	7	7.5	8	7.5	7.5	7
CBCL-2013-Minot	7.5	7	8	7.5	7	7	7.5	7.5	7.5	7	8	6.5	7.5	7.5	8	6.5	7.5	7	8	7.5	8.5	7.5	7.5	8	7	8	7	7.5	8	8	7	7	8	7.5	7	6.5	8	7.5	7.5	7.5	7.5	8	8	7.5	7	8	7	8	8
CBCL-2014-Prosper	7	8	8	8	8	7	8	7	7	7	7	7	7	7	8.5	7	7	8	8	8	10	10	9	9	10	10	9	9	10	10	9	10	10	10	10	9	10	10	10	10	10	10	8	8	8	8	7.5	8	8
CBCL-2014-Minot	8.5	7	8	8	8	8.5	7	7.5	8	8	8	7.5	6	6	7	8	8	7.5	8	8	8	7	6	8	8	8	8	7.5	8	8.5	8	8	7	7.5	8	8	7.5	8	7.5	7	8	7.5	8	8	6	8	8	7	8
CBCL-2014-Carrington	8	8	8.5	7.5	8	8	8	7.5	8	7.5	7	7.5	7	8	8.5	8	7	8	8	7	8	8	7.5	8	8	8	7	7.5	7	8	8	7	8	8	8	7.5	7	7	7	7.5	7	7	8	8	7.5	8	8	7.5	8
CBCL-Overall-(BLUP)	0.01942	-0.1413	0.2766	0.2444	-0.07701	-0.07701	0.08371	-0.04487	-0.01272	-0.2377	-0.1092	-0.2377	-0.3985	-0.1413	0.2444	-0.1413	0.05157	-0.04487	0.1801	0.01942	0.1801	0.05157	-0.1413	0.1159	0.01942	0.2123	-0.04487	-0.07701	0.01942	0.2123	0.148	0.1159	0.2766	0.1159	0.148	-0.1092	0.01942	0.08371	0.05157	0.01942	0.08371	0.148	0.1159	0.01942	-0.1092	0.08371	-0.01272	-0.1734	-0.01272
CTCL-2012-Carrington	10	10	10	10	9	10	10	10	10	10	10	10	9	10	10	10	9	8	10	10	10	10	10	9	10	10	9	10	10	10	9	10	10	10	10	10	10	10	9	10	10	10	10	10	10	9	10	10	8
CTCL-2012-Casselton	9	10	10	10	8	9	9	10	10	10	10	10	10	9	10	9	10	10	10	10	10	10	10	9	10	10	10	10	10	9	8	10	10	9	10	10	10	10	10	10	10	9	10	10	9	10	10	10	8
CTCL-2012-Prosper	10	10	10	10	10	10	10	10	10	9	10	10	10	10	10	9	10	10	9	10	10	10	10	10	10	10	10	9	10	10	10	10	10	10	10	10	10	10	10	10	9	10	9	10	10	10	9	10	10
CTCL-2013-Prosper	9	10	10	10	10	8	10	9	10	9	10	10	10	10	10	10	10	10	10	9	10	10	9	8	10	9	10	10	10	10	9	10	10	10	10	10	10	10	10	10	10	10	8	10	9	9	9	10	9
CTCL-2013-Carrington	9	10	10	9	9	9	9	10	9	9	10	10	9	10	10	10	10	10	10	10	10	10	9	10	9	10	10	10	10	10	8	10	10	9	10	10	10	10	10	10	10	10	9	10	9	9	10	9	10
CTCL-2013-Minot	10	10	10	9	9	9	10	10	10	10	10	10	9	9	10	10	10	10	10	10	9	10	10	9	10	9	10	10	9	9	10	10	8	8	9	10	10	10	9	9	9	10	9	10	10	9	10	9	9
CTCL-2014-Prosper	10	10	10	9	10	9	10	9	8	8	8	10	10	10	10	9	10	10	9	10	8	7	7.5	7	7.5	8	7	7	8	7.5	8	7	8	7	8	7	7	7	8	7	7	7	10	10	9	10	10	9	10
CTCL-2014-Minot	9	10	10	10	10	8	10	10	10	10	10	10	10	10	10	10	10	10	10	10	10	10	10	10	10	10	10	10	10	10	10	10	10	9	9	10	10	10	10	10	10	10	10	10	10	10	10	10	10
CTCL-2014-Carrington	10	10	10	10	10	10	10	10	10	9	9	10	10	10	10	10	9	10	10	10	10	10	10	10	10	10	9	10	10	10	10	10	10	10	8	10	10	10	10	10	10	9	10	10	10	10	10	9	10
CTCL-Overall-(BLUP)	-0.01366	0.06273	0.06273	0.005438	-0.03276	-0.09005	0.02454	0.02454	0.005438	-0.05186	0.005438	0.06273	0.005438	0.02454	0.06273	0.005438	0.02454	0.02454	0.02454	0.04363	0.005438	0.005438	-0.02321	-0.09005	-0.00411	-0.01366	-0.03276	-0.01366	0.005438	-0.02321	-0.09005	0.005438	-0.01366	-0.09005	-0.05186	0.005438	0.005438	0.005438	-0.01366	-0.01366	-0.03276	-0.03276	-0.03276	0.06273	-0.01366	-0.01366	0.02454	-0.01366	-0.05186
FlourExtrac-2012-Carrington	57.3	55.7	53	53.3	54	57.7	56	54.7	56.3	55.3	52	55.3	55	54.7	53.3	52.7	52	55.3	50	54	52	51.7	52	55	54.3	54	53.7	55.7	52	54.7	54	52	53.3	52.7	51	52	51.3	54.3	52	54	57.3	50.7	52.7	54.3	51.3	51.3	52	52.7	49.3
FlourExtrac-2012-Casselton	54.2812	55.5938	49.9688	50.625	51.8438	57.4688	51.8438	53.1562	55.0312	54.375	46.875	53.7188	56.25	54.375	52.5	53.1562	49.9688	52.5	54.375	49.9688	49.9688	52.5	49.4062	54.375	52.5	52.5	51.2812	53.7188	48.0938	53.7188	53.7188	50.625	51.2812	51.8438	48.75	52.5	49.9688	53.1562	52.5	51.2812	52.5	49.4062	50.0625	55.0312	55.5938	56.25	56.25	53.7188	50.625
FlourExtrac-2012-Prosper	59.3438	57.4688	52.5	56.25	49.9688	60	58.125	57.4688	58.7812	58.7812	53.1562	56.9062	59.3438	56.9062	57.4688	55.5938	55.5938	55.5938	51.8438	56.25	54.375	55.0312	55.0312	56.25	57.4688	55.0312	55.0312	56.9062	52.5	56.25	56.9062	55.5938	55.5938	54.375	54.375	51.8438	58.125	55.5938	56.25	56.9062	57.4688	54.375	55.5938	55.0312	53.7188	55.5938	54.375	53.1562	53.7188
FlourExtrac-2013-Prosper	54.7	51.3	48.7	49.3	49.3	51.3	50	52	52.7	54	46.7	51.3	52	51.3	52	48	46	50	46.5	49.3	48.7	49.3	49.3	50.7	50	47.3	49.3	52	49.3	50.7	50.7	48	50	52	48.7	51.3	48	48	50.7	53.3	55.3	46.7	52.7	52.7	50	54.7	52	50	47.3
FlourExtrac-2013-Carrington	56	54	54.7	52.7	51.3	56.7	54.7	54	52.7	53.3	49.3	51.3	54	52.7	52	53.3	50.7	48.7	49.3	47.3	50	51.3	48.7	53.3	51.3	50.7	52	54	50	54.7	52	47.3	49.3	50.7	50.7	51.3	50	52	51.3	54	52.7	50.7	54	52	50.7	52.7	54	53.3	49.3
FlourExtrac-2013-Minot	57.3	53.3	52.7	50.7	51.3	54.7	50.7	51.3	52	50.7	48	53.3	50	48.7	48.7	50.7	48	48	44	48.7	48	50	45.3	48.7	46.7	47.3	48	52	48.7	52.7	48	50	50.7	50	46.7	48	48	46	50	50.7	51.3	49.3	50	48	46.7	50.7	49.3	49.3	46.7
FlourExtrac-2014-Prosper	56	52.7	52	52	55.3	60.7	52.7	54.7	56.7	54.7	51.3	56	57.3	55.3	51.3	54.7	50	52	52.7	54	49.3	52	53.3	56	54	52.7	54	56	52	54.7	54	54	52.7	50.7	50.7	55.3	52.7	50.7	52	54	54	54.7	54	52	54	54.7	53.3	52.7	53.3
FlourExtrac-2014-Minot	58	53.3	56	53.3	54	54	56	46	48.7	55.3	50.7	56	56	54	53.3	56.7	52.7	54.7	51.3	54	56	53.3	52.7	56	57.3	53.3	53.3	56.7	54	52.7	52	55.3	47.3	46	50	53.3	54	54.7	52.7	55.3	56	52	50.7	48.7	47.3	55.3	56	55.3	46
FlourExtrac-2014-Carrington	51.3	50	46.7	52	52	51.3	56.7	51.3	54.7	50	50.7	56.7	56	55.3	56	52.7	54	48.7	54	52.7	47.3	51.3	50.7	56.7	50	48	54.7	56.7	48	52.7	56	55.3	55.3	56	48.7	56.7	51.3	51.3	53.3	56.7	55.3	53.3	56	53.3	50	52	53.3	54.7	51.3
FlourExtrac-Overall-(BLUP)	2.815	0.8893	-0.6885	-0.3275	-0.4355	2.7827	1.2041	0.08332	1.2816	1.1755	-2.3068	1.5512	2.046	0.8828	0.2624	0.3529	-1.3633	-0.7605	-1.8194	-0.6931	-1.6689	-0.6737	-1.596	1.2281	-0.01453	-1.1907	-0.2232	1.8466	-1.7667	0.844	0.3326	-0.5177	-0.7623	-0.8685	-2.2247	-0.1373	-0.9534	-0.7365	-0.2749	1.1505	1.6749	-1.1574	0.1867	-0.2463	-1.331	0.8782	0.628	0.1064	-2.4167
Mixo-Score-2012-Carrington	3	3	3	2	1	3	3	3	3	2	3	4	2	3	3	3	3	3	3	3	3	3	3	3	4	3	4	4	4	3	3	3	4	4	2	3	2	3	3	3	4	2	3	4	4	2	4	3	3
Mixo-Score-2012-Casselton	1	3	3	2	1	3	2	3	1	2	4	4	2	2	3	3	2	3	4	3	2	2	3	2	5	3	4	4	3	2	3	3	3	3	3	4	1	4	4	2	3	1	3	4	1	4	6	3	2
Mixo-Score-2012-Prosper	3	4	4	3	1	3	4	4	3	3	4	3	2	2	3	3	3	3	3	3	3	3	3	3	3	3	4	3	3	3	2	2	3	2	4	4	3	3	2	2	3	2	3	3	3	3	3	2	2
Mixo-Score-2013-Prosper	2	4	5	4	2	3	2	6	2	3	3	3	2	4	4	3	4	3	4	4	4	5	1	2	3	2	3	2	3	3	2	2	2	2	3	3	3	3	3	3	3	2	3	1	3	3	2	3	2
Mixo-Score-2013-Carrington	3	4	5	4	3	3	4	5	4	5	5	6	2	4	4	4	5	3	3	4	5	5	3	4	3	3	5	4	4	5	3	4	4	3	3	3	3	4	3	4	3	2	3	3	5	4	5	3	4
Mixo-Score-2013-Minot	3	5	7	4	3	3	5	6	3	4	4	3	3	4	4	4	5	3	2	3	5	5	5	4	3	4	3	3	3	2	4	3	3	1	2	2	2	3	1	4	4	4	4	4	4	4	4	4	2
Mixo-Score-2014-Prosper	4	5	6	4	2	4	3	4	3	4	5	4	4	3	3	4	4	3	3	3	5	6	3	4	4	3	3	4	3	4	3	2	3	5	3	4	3	6	3	3	4	5	3	4	6	5	5	5	4
Mixo-Score-2014-Minot	3	6	4	3	2	3	3	4	2	4	5	4	3	3	4	3	5	4	3	3	6	7	5	5	5	4	4	4	4	4	5	4	3	3	2	5	4	4	3	5	6	3	3	3	3	5	4	3	3
Mixo-Score-2014-Carrington	2	3	2	2	1	2	3	3	2	2	5	4	2	3	3	3	3	3	2	2	2	3	2	2	2	2	3	2	3	2	3	2	2	2	2	2	3	4	2	3	3	2	2	2	2	3	2	2	2
Mixo-Score-Overall-(BLUP)	-0.4895	0.6488	0.8239	-0.1392	-1.1899	-0.2268	-0.05168	0.7363	-0.577	-0.05168	0.7363	0.4737	-0.6646	-0.1392	0.1234	0.03587	0.3861	-0.1392	-0.2268	-0.1392	0.4737	0.8239	-0.1392	-0.05168	0.211	-0.2268	0.2985	0.03587	0.03587	-0.1392	-0.1392	-0.4019	-0.2268	-0.4019	-0.4895	0.03587	-0.4895	0.3861	-0.4895	-0.05168	0.2985	-0.577	-0.2268	-0.1392	0.1234	0.2985	0.4737	-0.1392	-0.4895
ENLSMIN-2012-Carrington	23.67	30.576	21.869	38.516	43.879	20.943	23.993	33.293	21.569	27.413	29.606	20.277	28.205	35.227	23.386	24.255	17.723	17.99	21.864	18.907	27.982	31.687	57.11	29.026	26.06	27.982	29.568	32.565	28.892	25.763	24.558	27.422	27.034	24.864	23.335	15.51	23.131	27.293	19.941	14.963	22.294	22.301	19.896	26.904	21.906	23.771	24.578	26.453	29.64
ENLSMIN-2012-Casselton	18.928	22.92	21.787	23.402	23.021	15.039	27.563	25.051	19.709	28.595	36.219	18.846	25.854	21.951	22.815	20.778	19.336	35.259	23.548	26.665	21.513	32.033	16.454	22.281	16.926	18.554	20.17	22.097	17.938	15.802	14.094	12.01	23.007	20.013	33.589	23.669	29.218	21.019	22.099	24.836	19.143	18.896	18.354	24.836	19.457	23.882	23.121	20.32	28.814
ENLSMIN-2012-Prosper	24.515	24.815	26.672	41.86	20.325	15.052	19.652	19.707	19.423	15.93	16.909	12.71	12.463	16.621	16.111	12.388	13.715	19.592	18.862	14.49	13.785	50.339	17.907	19.946	13.471	15.055	16.719	17.088	22.671	13.797	10.973	30.15	14.31	17.795	16.362	18.481	19.459	20.385	18.068	18.934	19.439	16.044	16.508	26.144	16.316	18.862	13.485	22.007	18.602
ENLSMIN-2013-Prosper	36.599	33.425	33.458	36.315	37.465	25.257	27.795	64.776	26.96	23.075	20.132	21.591	21.707	28.012	34.759	36.039	24.903	39.206	29.243	24.532	34.162	33.751	22.483	28.563	26.324	24.506	25.964	28.547	27.165	23.216	20.505	24.297	21.111	21.274	46.632	21.47	25.75	25.091	24.184	16.422	27.467	21.293	27.718	28.778	25.132	25.792	18.304	24.38	24.466
ENLSMIN-2013-Carrington	27.668	35.555	47.124	30.251	41.855	25.815	33.959	28.601	29.916	23	34.597	21.389	4.392	28.097	28.358	25.33	31.92	34.636	30.219	22.362	21.657	30.988	29.306	41.11	32.641	30.906	20.42	32.076	23.014	18.345	22.766	22.691	27.628	28.734	25.2	31.031	27.219	32.978	30.331	32.251	32.55	26.39	26.561	30.997	36.051	29.524	32.577	30.813	33.852
ENLSMIN-2013-Minot	25.406	24.689	30.836	24.026	28.046	22.565	57.012	27.325	25.493	23.495	17.3	10.961	21.693	24.392	25.739	14.64	23.302	26.653	18.69	31.618	31.514	35.405	49.795	23.557	15.327	15.11	22.942	17.605	26.716	13.395	16.54	22.853	26.995	9.994	30.435	15.072	18.078	13.745	21.56	8.853	26.89	20.251	26.736	20.334	22.591	19.767	21.044	16.612	17.634
ENLSMIN-2014-Prosper	26.638	26.8	21.696	30.267	34.13	16.087	35.021	17.951	24.042	10.306	25.412	20.008	12.484	28.348	25.593	14.15	11.686	14.126	11.799	30.607	23.751	39.781	14.611	21.066	31.19	12.515	17.397	23.19	18.348	17.98	16.13	16.142	23.33	26.336	29.176	14.532	12.064	38.162	19.807	36.965	17.188	27.492	30.325	36.48	26.352	35.877	30.504	27.835	23.768
ENLSMIN-2014-Minot	32.35	25.519	39.516	23.966	25.275	18.519	37.841	19.835	17.571	27.727	26.364	22.217	21.319	22.823	34.273	23.239	23.593	29.6	22.598	19.873	22.366	28.436	30.227	27.455	27.506	23.798	26.561	23.124	23.138	20.134	19.963	38.444	25.23	27.625	28.683	25.489	29.679	20.834	26.186	23.147	34.468	32.823	28.462	32.28	29.736	25.764	18.196	22.901	27.533
ENLSMIN-Overall-(BLUP)	1.8286	2.5031	3.9794	4.426	4.8527	-2.6415	5.5521	3.4715	-0.6314	-1.0382	1.0979	-3.5338	-3.5245	1.0134	1.4535	-1.7283	-2.0955	1.9305	-1.2533	-0.2855	0.3218	7.1016	3.5786	1.6094	-0.2546	-1.9176	-1.0224	0.2871	-0.3783	-3.4996	-3.7293	0.1065	-0.3179	-1.2681	3.2241	-2.1686	-0.6381	0.5415	-0.8297	-1.289	0.5361	-0.5675	0.1501	2.6972	0.386	0.8368	-0.8588	-0.1062	0.9214
ENRSMIN-2013-Prosper	-16.486	-14.166	-13.139	-18.68	-18.533	-9.779	-14.647	-8.154	-11.9	-13.008	-7.371	-7.185	-11.043	-13.881	-17.298	-15.514	-10.282	-16.355	-13.886	-9.563	-12.979	-13.958	-12.606	-18.987	-11.816	-7.913	-9.96	-8.305	-17.081	-7.963	-8.161	-11.055	-11.961	-11.171	-19.15	-9.229	-12.987	-9.721	-10.344	-7.396	-12.803	-11.213	-15.789	-14.903	-10.811	-11.319	-8.838	-13.702	-14.794
ENRSMIN-2013-Carrington	-10.835	-11.43	-15.026	-16.487	-19.198	-10.134	-12.168	-10.377	-14.602	-12.14	-13.457	-10.761	2.403	-12.95	-12.101	-13.178	-11.683	-16.945	-12.675	-8.296	-8.811	-12.853	-13.139	-14.251	-12.548	-10.45	-13.599	-10.452	-7.341	-5.8	-10.069	-8.933	-7.836	-10.145	-10.305	-11.37	-15.885	-11.75	-12.206	-11.177	-12.958	-9.052	-11.89	-14.295	-10.833	-12.265	-11.739	-13.987	-13.175
ENRSMIN-2013-Minot	-10.742	-10.037	-10.084	-10.848	-11.739	-9.585	-15.68	-10.094	-9.451	-7.993	-7.814	-5.371	-5.963	-9.995	-11.508	-8.713	-6.88	-13.409	-7.875	-7.083	-5.701	-12.195	-9.524	-9.778	-8.947	-6.51	-9.428	-5.942	-9.896	-6.156	-5.233	-7.557	-8.053	-5.014	-10.466	-7.386	-9.13	-6.984	-5.24	-4.915	-7.62	-7.432	-7.899	-8.732	-8.007	-10.277	-8.028	-10.585	-10.474
ENRSMIN-2014-Prosper	-6.884	-11.357	-6.214	-7.638	-14.889	-8.229	-8.075	-9.303	-8.82	-6.801	-9.116	-5.663	-6.138	-5.993	-9.591	-6.893	-6.357	-9.885	-7.425	-7.734	-6.134	-17.256	-6.77	-6.391	-5.648	-4.954	-10.374	-13.657	-8.676	-5.404	-5.301	-8.596	-5.053	-6.951	-8.818	-7.579	-7.369	-10.724	-5.076	-22.757	-8.452	-17.492	-8.875	-5.871	-9.826	-7.894	-4.805	-6.026	-11.637
ENRSMIN-2014-Minot	-14.126	-7.951	-14.9	-8.281	-14.846	-6.343	-12.03	-7.915	-8.119	-11.745	-15.715	-8.826	-12.636	-8.678	-12.65	-13.329	-13.611	-10.484	-9.529	-5.562	-8.778	-13.333	-17.943	-18.354	-13.857	-9.293	-18.723	-11.945	-10.17	-7.603	-10.571	-13.544	-9.918	-11.526	-14.087	-12.597	-19.218	-11.23	-13.728	-10.825	-10.138	-18.719	-14.962	-14.196	-15.767	-15.673	-8.468	-13.684	-12.46
ENRSMIN-Overall-(BLUP)	-0.9186	-0.4134	-0.9541	-1.2684	-3.38	0.9157	-1.3498	0.6989	-0.1629	-0.01559	-0.234	1.6815	2.223	0.007637	-1.4168	-0.7418	0.3358	-1.8973	0.02072	1.6287	1.1195	-2.2051	-1.0298	-1.9808	-0.1536	1.5209	-1.2868	0.1539	-0.1962	2.2782	1.4946	0.2292	1.0684	0.8256	-1.3775	0.4155	-1.593	0.1407	0.6071	-0.6737	-0.05032	-1.5098	-0.9604	-0.7871	-0.4505	-0.7175	1.1837	-0.7855	-1.3425
MLPTMIN-2012-Carrington	4.13	4.54	3.95	3.8	2.85	6.83	3.6	4.25	3.48	3.27	3.48	6.2	6.49	3.9	3.38	4.84	5.25	4.78	4.3	5.13	4.13	3.77	3.6	4.05	4.18	4.82	4.38	3.61	5.48	5.36	4.08	3.26	3.64	3.35	2.84	7.3	3	4.54	4.58	6.2	4.23	5.18	2.9	3.49	5.83	4.03	5.84	3.9	3.46
MLPTMIN-2012-Casselton	3.5	3.66	4.19	3.28	2.56	5.53	2.97	3.38	3.27	3.06	3.46	5.09	4.86	3.63	3.65	4.96	5.56	3.33	3.44	5.09	4.3	2.6	5	3.46	5.42	5.08	5.06	4.11	5.61	6.14	5.97	0.8	3.74	4.74	2.88	3.87	3.02	4.68	4.32	3.67	3.89	5.2	2.89	3.67	5.45	4.3	5.88	3.8	2.84
MLPTMIN-2012-Prosper	4.35	4.22	4.38	4.52	2.98	8.02	3.35	5.07	4.29	4.38	4.3	7.8	6.35	4.25	4.63	7.59	6.19	3.73	4.59	5.65	5.02	3.54	5.61	4.73	6.43	6.55	6.61	6.39	7.12	8.66	7.67	4.06	4.83	5.67	3.89	5.75	4.75	6.99	6.15	6.23	4.42	6.23	4.04	5.36	8.37	5.93	9.3	6.57	4.99
MLPTMIN-2013-Prosper	2.61	2.96	3.75	2.95	2.26	3.47	2.48	3.41	2.98	2.82	3.45	4.44	3.58	3.6	2.61	3.41	3.36	2.47	2.91	3.58	2.67	3.35	3.33	2.53	3.71	4.23	4.01	3.21	3.34	4.14	4.37	2.89	3.05	3.02	2.33	3.63	2.95	3.91	3.66	4.17	3.44	3.66	2.54	3.03	4.04	3.33	3.26	3.35	3
MLPTMIN-2013-Carrington	3.2	3.67	3.59	3.22	2.03	4.49	2.81	4.13	3.37	3.78	3.27	4.98	8	3.56	3.36	3.75	4.05	2.58	2.96	4.2	3.39	3.4	3.17	3.4	3.43	4.17	4.26	4.22	6.59	6.97	4.68	4.05	4.77	3.52	3.99	6.06	3.18	4.1	3.67	3.62	4.04	6.12	3.28	3.52	4.87	4.16	4.48	3.13	3.98
MLPTMIN-2013-Minot	3.78	4.04	4.33	4.11	2.78	4.42	2.4	4.03	3.3	3.86	3.72	6.23	4.72	3.34	3.65	3.99	4.32	3.38	4.02	4.1	4.02	3.8	3.34	4.15	4.08	4.04	3.87	4.12	3.79	5.5	4.89	3.07	3.31	3.32	3.08	5.39	3.3	4.99	4.19	4.78	3.78	4.45	3.35	3.26	4.84	3.82	3.96	3.42	2.96
MLPTMIN-2014-Prosper	3.51	3.6	4.81	3.81	2.32	3.95	2.8	4.63	3.28	3.19	3.87	5.73	4.19	3.81	3.46	3.63	4.26	3.14	3.27	4.39	3.95	3.26	3.6	4.33	4.28	4.79	4.16	3.55	4.2	5.28	4.61	3.31	3.21	3.28	3.58	4.18	3.38	3.04	3.96	3.36	4.16	3.84	3.43	4.01	5.13	5.03	5.33	4.9	3.7
MLPTMIN-2014-Minot	2.75	4.14	4.59	4.29	2.37	5	2.66	3.95	3.53	3.43	3.31	5.2	3.73	3.32	3.12	3.64	4.04	3.19	3.53	4.38	3.56	4	3.46	3.21	3.63	4.38	3.91	3.7	3.72	4.68	3.81	2.94	3.25	3	2.86	4.53	3.18	3.58	3.58	3.78	3.23	4.08	3.03	2.96	5.27	3.84	4.22	3.75	3.79
MLPTMIN-2014-Carrington	3.66	3.63	5.63	2.88	2.18	4.89	2.51	3.97	3.27	3.67	3.2	4.56	5.02	3.34	2.51	3.48	3.32	3.75	4.12	5	4.01	4.42	5.23	3.59	6.96	4.71	4.36	3.79	5.15	4.75	3.76	3.92	3.41	4.4	3.71	6.47	3.31	4.5	4.05	3.52	3.54	4.09	3.06	3.41	4.69	4.15	4.62	3.61	3.74
MLPTMIN-Overall-(BLUP)	-0.5981	-0.2972	0.1851	-0.4593	-1.5261	0.9327	-1.1968	-0.05808	-0.671	-0.6011	-0.5403	1.3005	0.9672	-0.4704	-0.7115	0.1922	0.2995	-0.7136	-0.4309	0.4181	-0.2374	-0.5322	-0.1067	-0.3995	0.4789	0.5447	0.3269	-0.07024	0.7707	1.4272	0.6531	-0.9213	-0.4238	-0.3134	-0.8341	0.9915	-0.7419	0.2975	0.07768	0.1962	-0.2698	0.5528	-0.899	-0.4745	1.1242	0.1212	0.9621	-0.09759	-0.4998
MLPV-2013-Prosper	69.842	77.35	77.006	77.691	69.551	64.567	68.986	90.114	64.941	67.767	67.11	62.994	66.245	72.381	78.864	71.889	68.465	74.115	71.421	73.57	74.512	82.498	62.834	74.64	68.735	69.021	65.41	70.741	71.598	67.995	62.779	64.398	63.807	60.534	73.291	66.142	70.679	69.583	64.994	64.51	73.426	67.9	69.31	70.726	69.339	69.631	65.83	70.614	70.441
MLPV-2013-Carrington	71.861	78.116	82.782	76.371	72.499	67.075	72.772	76.826	67.064	72.844	80.945	70.681	26.109	69.665	75.816	70.185	71.896	76.749	68.405	70.451	68.756	83.71	67.409	71.787	72.817	75.393	68.428	69.929	63.288	60.485	67.07	66.699	66.625	67.956	68.671	73.71	74.662	74.106	69.107	71.68	70.582	68.902	65.201	69.149	72.096	72.772	70.763	73.625	72.911
MLPV-2013-Minot	60.974	65.325	68.403	61.883	60.332	60.406	72.759	70.6	63.17	64.617	61.942	56.816	52.394	60.91	63.227	60.892	62.852	65.582	57.131	61.788	63.501	77.367	68.582	62.285	61.441	63.156	62.213	57.478	64.145	57.725	53.247	55.992	55.097	46.859	57.162	56.453	59	52.21	48.802	49.384	57.314	58.565	56.628	63.186	62.739	64.558	59.269	63.879	57.702
MLPV-2014-Prosper	33.748	37.828	31.561	33.925	35.672	34.797	40.617	29.033	38.967	32.269	39.751	37.75	32.32	37.507	38.924	37.824	32.254	35.05	32.193	33.163	34.63	45.34	34.81	35.456	33.583	37.096	32.546	36.795	40.949	31.878	30.956	32.66	29.56	36.662	38.438	31.914	33.26	47.674	33.048	43.337	40.931	39.954	51.195	46.741	48.371	48.609	45.401	50.251	34.269
MLPV-2014-Minot	45.809	60.557	62.219	58.893	49.84	45.372	50.179	45.547	46.478	51.534	50.289	46.328	47.127	46.004	56.233	50.204	49.424	55.697	48.17	47.62	43.67	52.995	52.06	51.501	49.689	49.532	46.259	55.517	47.765	42.953	40.318	56.759	42.38	39.43	47.15	45.372	47.73	48.95	44.021	42.419	48.853	51.424	47.108	42.05	44.263	46.966	38.008	45.57	46.972
MLPV-2014-Carrington	58.791	64.792	48.241	62.3	56.617	49.044	57.35	55.11	55.853	56.004	66.803	59.617	50.203	54.536	60.208	57.721	60.157	58.206	50.266	51.295	53.398	60.403	52.811	59.518	47.763	58.463	59.598	66.674	66.412	64.2	62.921	55.073	62.516	56.654	60.765	56.02	75.571	62.799	62.26	69.708	70.415	68.029	64.863	69	64.633	65.497	58.396	68.194	65.682
MLPV-Overall-(BLUP)	-0.9886	2.7668	1.5638	1.6383	-0.6838	-2.717	0.9037	1.3031	-1.3867	-0.6379	1.2689	-1.5867	-6.8153	-0.9905	1.8314	-0.3161	-0.6368	1.1429	-2.1639	-1.263	-1.2123	4.3711	-1.2089	0.2499	-1.6005	0.02897	-1.5633	0.4201	0.1598	-2.3694	-3.0642	-1.8145	-2.8286	-3.8684	-0.5993	-1.9868	0.7497	0.2617	-2.6321	-0.9875	0.8038	0.2138	0.1727	0.7453	0.7968	1.3733	-1.2823	1.7318	-0.3807
MLTV-2013-Prosper	51.743	61.082	63.364	56.122	48.458	53.462	52.139	77.533	50.296	52.879	58.647	57.496	53.761	58.422	57.245	54.156	55.723	54.447	56.396	65.71	58.437	66.754	48.769	52.412	56.986	60.888	55.882	59.941	55.26	60.302	55.413	51.129	49.423	47.429	51.702	55.116	54.835	59.263	53.825	57.842	59.045	55.946	51.135	54.29	58.73	56.422	53.802	55.179	52.817
MLTV-2013-Carrington	60.958	69.842	74.153	63.201	51.548	65.554	60.68	73.797	56.706	65.002	71.654	70.684	19.772	60.94	65.789	61.778	67.842	58.631	56.668	68.949	61.6	75.639	56.588	60.688	62.902	71.267	63.892	68.817	46.478	42.485	66.464	63.152	66.404	59.896	62.456	63.363	61.536	69.598	60.454	64.238	66.623	52.149	55.873	59.389	71.8	68.185	69.324	60.596	65.732
MLTV-2013-Minot	53.656	61.485	67.651	56.951	48.531	58.511	56.237	67.807	53.84	60.059	58.6	54.345	52.159	52.438	55.82	56.253	60.576	54.814	53.374	59.885	60.826	70.055	59.91	59.216	57.758	60.26	57.083	55.917	57.392	57.289	53.127	48.585	48.726	42.712	47.724	55.896	50.36	52.213	46.373	49.172	53.592	56.969	49.585	55.575	62.696	59.527	54.8	53.788	46.63
MLTV-2014-Prosper	30.924	36.298	31.443	32.143	25.156	32.826	34.561	28.663	33.854	28.605	37.873	35.87	31.141	34.253	34.519	34.185	31.665	29.182	28.396	32.656	32.289	40.714	32.445	34.038	32.683	36.893	30.52	32.755	40.363	31.497	30.786	28.272	25.644	33.258	33.985	31.245	29.02	44.406	31.826	40.779	38.999	37.593	47.043	45.42	48.261	48.608	45.061	50.196	31.213
MLTV-2014-Minot	35.854	58.481	61.608	57.206	37.505	45.365	40.428	42.26	41.522	46.765	46.418	45.912	43.108	39.53	47.494	43.84	47.656	48.336	44.054	46.669	39.051	51.108	45.007	43.25	44.567	48.444	41.999	51.658	44.105	42.541	37.07	48.184	36.44	32.346	37.402	44.881	38.817	42.719	37.395	39.899	42.276	49.57	37.821	33.103	44.077	43.286	36.308	40.026	42.203
MLTV-2014-Carrington	51.487	58.513	46.564	48.929	42.766	49.016	48.893	52.767	48.291	50.809	62.918	59.133	50.198	50.017	49.111	50.073	54.031	52.839	48.647	51.295	51.538	59.7	52.334	51.343	42.072	58.212	59.278	63.439	66.226	63.641	60.068	52.495	56.616	54.991	53.72	44.186	64.318	62.254	59.239	62.505	61.717	64.759	52.657	56.424	64.422	62.287	57.714	58.606	57.768
MLTV-Overall-(BLUP)	-3.0474	3.0968	3.0045	-0.03658	-6.1314	-1.0242	-2.2108	2.8077	-3.0587	-1.0861	2.132	0.8575	-6.5162	-1.943	-0.4967	-1.4718	0.2593	-1.6766	-2.7543	1.0309	-1.1241	4.9346	-1.9981	-1.4052	-1.8054	2.1174	-0.6299	1.7716	-0.5122	-1.7263	-1.2059	-2.3236	-3.1851	-4.4547	-2.8093	-2.0349	-1.6125	1.563	-2.5957	-0.04835	0.738	0.2083	-2.0925	-1.0778	3.5279	2.3538	0.2106	0.3496	-1.8663
MLPW-2012-Carrington	14.002	15.805	15.436	10.703	9.505	10.535	12.354	12.111	11.557	10.506	14.369	15.069	10.589	12.635	11.838	12.128	10.058	11.291	11.986	11.526	14.238	15.751	15.965	11.322	15.551	14.778	14.902	16.781	16.881	11.061	13.204	13.193	15.151	17.569	11.004	10.998	10.682	13.014	12.075	12.193	19.826	11.06	16.956	15.234	16.209	13.246	16.97	16.702	15.777
MLPW-2012-Casselton	8.947	14.251	13.203	10.522	8.453	10.454	11.914	14.506	10.65	13.486	19.092	15.088	13.032	10.609	15.574	13.303	13.31	16.49	16.476	11.639	15.663	14.269	12.362	11.829	13.028	12.535	16.105	16.668	13.249	11.753	11.058	14.644	14.837	12.007	13.663	16.119	10.489	15.831	14.313	11.556	10.823	9.873	12.877	16.92	8.701	14.214	22.357	12.319	15.559
MLPW-2012-Prosper	16.303	13.949	16.563	14.481	9.969	12.172	14.86	13.676	10.194	11.391	14.159	10.79	9.472	11.984	10.353	11.662	12.474	13.44	11.391	12.073	13.499	17.154	11.037	13.511	11.459	13.861	16.132	11.804	10.692	11.434	9.776	11.798	11.291	11.737	11.726	13.113	12.623	12.39	12.185	12.312	12.415	9.558	13.932	13.607	13.427	14.266	10.149	12.095	11.743
MLPW-2013-Prosper	15.403	20.79	20.612	18.772	13.939	15.241	14.362	13.158	13.247	16.809	16.362	14.721	14.88	19.966	18.507	15.672	17.802	16.592	18.805	19.417	19.676	19.725	11.222	16.819	19.19	15.62	20.299	17.524	17.251	15.473	13.361	14.666	11.009	11.191	17.981	15.214	15.736	17.194	15.333	17.522	16.541	14.668	16.576	12.387	17.889	14.499	14.425	15.409	15.407
MLPW-2013-Carrington	18.838	22.666	22.669	23.542	24.375	18.559	20.788	25.889	22.226	19.27	25.843	24.305	6.006	22.449	22.535	21.184	24.668	20.993	17.074	18.899	26.905	26.157	19.394	21.12	21.947	19.371	23.82	17.292	19.345	21.6	19.474	21.604	20.031	19.132	18.114	21.622	22.816	20.937	17.549	23.894	19.53	17.016	18.794	19.756	23.764	21.49	20.819	19.845	20.7
MLPW-2013-Minot	14.809	19.124	27.193	16.463	14.503	15.149	18.713	24.449	15.531	17.438	19.363	15.238	13.828	16.087	16.777	16.282	17.81	20.052	16.577	15.809	23.359	24.05	23.213	19.196	19.708	18.474	16.215	18.905	15.468	14.331	14.705	17.347	14.81	12.625	15.757	13.212	15.192	14.575	11.848	20.117	16.945	15.202	17.981	20.268	19.663	20.148	15.344	16.415	15.131
MLPW-2014-Prosper	16.13	16.794	20.188	16.529	13.691	21.4	17.797	20.833	24.201	19.567	18.944	20.595	27.549	27.698	18.822	15.322	19.482	19.963	15.769	21.392	18.55	16.542	14.25	12.607	15.899	21.561	13.219	17.875	11.428	22.718	14.978	18.622	12.187	30.876	22.642	33.624	20.271	22.106	20.148	20.437	19.857	20.706	13.37	12.706	13.243	26.536	17.877	16.425	19.141
MLPW-2014-Minot	20.89	24.107	27.911	21.49	20.874	17.998	21.822	19.969	16.591	20.824	38.498	23.165	22.355	18.858	26.693	19.213	28.011	23.369	20.209	18.195	32.194	35.297	32.935	33.22	27.224	32.013	33.265	27.947	26.275	23.769	22.548	23.322	19.808	24.755	20.788	32.164	25.902	24.66	25.241	32.183	41.416	22.663	23.258	27.328	21.969	34.686	23.196	24.394	26.255
MLPW-2014-Carrington	13.561	15.634	10.738	15.196	10.964	9.123	13.245	14.303	12.745	12.027	19.738	16.352	10.199	13.911	14.921	14.371	14.512	13.68	12.248	11.687	16.648	14.598	10.857	13.66	9.612	15.408	21.752	20.504	19.716	13.747	17.938	13.028	15.256	12.009	14.396	15.069	22.443	21.307	16.715	21.66	20.033	16.643	17.717	16.495	18.525	20.243	16.47	17.599	15.718
MLPW-Overall-(BLUP)	-1.4026	0.0835	0.7821	-0.8621	-2.1758	-1.9086	-0.9751	-0.1756	-1.5216	-1.2533	1.509	-0.3946	-2.0754	-0.4636	-0.3518	-1.387	-0.2227	-0.361	-1.3013	-1.2951	1.1634	1.3357	-0.6452	-0.5196	-0.4991	0.1142	0.8554	0.2172	-0.7023	-0.9732	-1.5155	-0.8299	-1.6787	-0.6044	-0.9619	0.5749	-0.3436	0.01568	-1.0026	0.6203	0.9582	-1.4942	-0.6314	-0.4327	-0.5131	1.0773	-0.2545	-0.6472	-0.388
MLPI-2013-Prosper	126.1	160.03	199.234	153.715	106.518	151.701	118.564	245.652	127.768	134.467	162.614	185.439	155.047	167.236	142.392	163.355	159.038	128.751	145.708	145.668	193.18	190.673	134.94	128.71	171.845	174.67	163.045	159.88	185.135	156.878	175.572	129.265	135.949	126.713	116.984	163.938	149.51	176.826	156.671	173.348	162.804	118.883	146.484	126.258	184.416	159.141	149.89	163.117	140.041
MLPI-2013-Carrington	145.865	183.328	216.221	161.384	97.703	173.841	140.104	198.963	143.613	184.401	180.532	229.058	153.173	161.997	165.254	168.292	183.969	133.63	134.251	169.281	201.052	201.248	137.707	155.154	155.429	178.562	188.668	242.836	259.193	183.249	199.966	177.253	207.786	156.017	169.99	268.36	151.398	187.811	159.425	182.644	230.301	138.81	155.158	134.723	212.478	195.481	197.013	151.573	177.321
MLPI-2013-Minot	141.326	168.564	189.386	158.253	111.08	161.822	125.107	180.643	135.872	167.978	164.979	254.146	162.512	138.087	149.098	161.702	188.173	136.845	142.037	176.754	201.846	190.222	153.544	158.027	167.39	165.266	164.591	152.549	219.076	138.626	186.138	120.227	121.883	117.325	116.132	193.725	141.908	180.657	140.801	148.813	169.122	131.1	144.344	126.911	202.164	167.026	165.092	148.726	120.894
MLPI-2014-Prosper	114.976	113.265	109.326	133.634	150.638	124.07	148.449	115.449	193.535	139.45	84.606	81.042	155.88	108.212	166.115	114.208	137.724	108.227	176.685	69.824	130.891	120.668	130.049	209.269	109.501	91.458	167.612	124.419	175.133	101.189	153.776	188.739	71.904	123.868	189.858	165.379	171.329	150.721	131.169	137.269	169.862	116.22	129.248	143.095	213.15	92.492	85.92	97.049	86.224
MLPI-2014-Minot	78.249	166.105	199.632	158.053	75.654	132.457	82.816	103.201	99.884	112.474	107.546	133.043	105.969	94.522	108.618	107.846	126.232	109.659	101.96	91.978	137.184	125.512	113.177	104.834	122.071	101.606	131.02	100.103	119.565	96.358	90.601	110.373	81.455	67.705	83.494	113.684	88.778	101.956	90.223	88.598	130.448	86.63	72.146	87.037	137.098	108.608	97.095	98.606	99.412
MLPI-2014-Carrington	146.766	160.517	185.731	131.035	90.418	163.783	102.771	157.413	128.77	139.403	151.681	193.247	176.267	132.021	111.579	142.509	141.108	152.378	148.441	152.055	165.939	170.637	141.791	141.31	198.841	177.649	163.711	195.704	207.09	160.163	156.47	137.24	136.27	154.394	128.863	218.867	159.111	173.572	149.624	156.727	178.626	133.701	151.602	130.986	180.27	173.521	184.302	161.869	154.506
MLPI-Overall-(BLUP)	-9.9914	10.3973	25.5682	4.6733	-22.4459	5.8646	-13.6343	15.4821	-2.1698	2.8349	0.1426	23.1491	5.9852	-4.9804	-0.7716	0.7541	8.7987	-8.3268	-0.1528	-4.6225	18.4369	15.2397	-4.0424	4.7996	7.6519	3.9685	13.1535	12.8294	32.3116	-1.4487	11.4976	1.2866	-9.7896	-10.737	-4.647	28.0764	1.1774	12.4239	-2.3268	3.7824	19.5739	-12.8606	-5.298	-10.4301	28.6539	4.6933	2.9518	-3.0429	-7.412
DO-2013-Prosper	8	10	10	8	9	10	8	10	8	9	10	10	8	10	9	8	10	9	9	10	9	10	9	10	10	10	10	9	10	8	10	9	9	8	9	10	10	10	9	9	9	8	10	8	9	10	10	10	9
DO-2013-Carrington	10	9	10	10	9	9	10	10	9	10	10	9	9	9	10	10	9	10	10	10	10	9	10	10	10	10	9	9	8	8	10	10	9	9	10	10	10	10	8	10	10	8	10	8	9	10	10	9	10
DO-2013-Minot	10	9	9	10	10	10	9	9	10	10	10	9	9	10	8	10	10	10	10	10	9	10	10	10	9	9	10	10	9	10	10	10	9	10	8	10	10	10	10	10	10	9	10	8	9	10	9	10	10
DO-2014-Minot	9	8	9	9	8	10	8	10	9	9	10	9	9	9	10	9	10	9	10	10	10	9	10	10	9	10	9	9	8	8	10	10	10	9	8	9	9	10	9	9	9	10	9	9	9	10	9	10	9
DO-Overall-(BLUP)	0.007381	-0.0812	0.09596	0.007381	-0.0812	0.1845	-0.1698	0.1845	-0.0812	0.09596	0.2731	0.007381	-0.1698	0.09596	0.007381	0.007381	0.1845	0.09596	0.1845	0.2731	0.09596	0.09596	0.1845	0.2731	0.09596	0.1845	0.09596	0.007381	-0.1698	-0.2583	0.2731	0.1845	0.007381	-0.0812	-0.1698	0.1845	0.1845	0.2731	-0.0812	0.09596	0.09596	-0.1698	0.1845	-0.3469	-0.0812	0.2731	0.09596	0.1845	0.09596
[truncated: 78 more columns]
